# Supplementary material for: Rapid evaluation of COVID-19 vaccine effectiveness against VOC/VOIs by genetic mismatch
Source: bioRxiv or medRxiv preprint supplement (doi:10.1101/2021.04.22.21254079), 2021-11-26
Supplement: Supplementary file [file media-2.zip]

We gratefully acknowledge the following Authors from the Originating laboratories responsible for obtaining the specimens, as well as the Submitting laboratories where the genome data were generated and shared via GISAID, on which this research is based.

All Submitters of data may be contacted directly via [www.gisaid.org](http://www.gisaid.org)

Authors are sorted alphabetically.

| Accession ID                                                                                                                                                                                                                                                                                                                                                                                                                                                                                                                                   | Originating Laboratory                                                 | Submitting Laboratory                                                  | Authors                                                                                                                                                                                                                                                                                                |
|------------------------------------------------------------------------------------------------------------------------------------------------------------------------------------------------------------------------------------------------------------------------------------------------------------------------------------------------------------------------------------------------------------------------------------------------------------------------------------------------------------------------------------------------|------------------------------------------------------------------------|------------------------------------------------------------------------|--------------------------------------------------------------------------------------------------------------------------------------------------------------------------------------------------------------------------------------------------------------------------------------------------------|
| EPI_ISL_1109484, EPI_ISL_1109485, EPI_ISL_1109624                                                                                                                                                                                                                                                                                                                                                                                                                                                                                              | Medical Ain Shams Research Institute (MASRI), Ain Shams University     | Medical Ain Shams Research Institute (MASRI), Ain Shams University     | Hesham Elghazaly, Sara Hassan Agwa, Hala Hafez , Fatma Ebied, Manal Hamdy Elsaid, Mohamed Elhadidi, Aya Mohamed , Shimaa Moustafa, Reham Kassab, Iman Foda , Samia Abdou Girgis, Hoda Ezz Elarab, Hagar Elshora, Osama Mansour.                                                                        |
| EPI_ISL_524426                                                                                                                                                                                                                                                                                                                                                                                                                                                                                                                                 | Egyptian National Cancer Institute (ENCI)                              | Egyptian National Cancer Institute (ENCI)                              | Zekri, Abdel Rahman N., Amer,K.E., Ahmed,O.S., Soliman,H.K., Ali,M.A., Hassan,W.A., Mahmoud,A.A., Khattab,A.A., Hafez,M.M., Abouelhoda, Mohamed                                                                                                                                                        |
| EPI_ISL_524427                                                                                                                                                                                                                                                                                                                                                                                                                                                                                                                                 | Egyptian National Cancer Institute (ENCI)                              | Egyptian National Cancer Institute (ENCI)                              | Zekri, Abdel Rahman N, Amer,K.E., Ahmed,O.S., Soliman,H.K., Hafez,M.M., Bahnassy,A.A., Abdelhamid,W., Gad,A., Ali,M., Hassan,W., Samir,M., Raouf,A., Hamdy,M.S., Soliman,M.S., Elsissey,M.H., Elkhateeb,S.M., Ezzelarab,M.H., Abouelhoda, Mohamed                                                      |
| EPI_ISL_526975, EPI_ISL_526976, EPI_ISL_526977, EPI_ISL_526978, EPI_ISL_526979, EPI_ISL_526980, EPI_ISL_526981, EPI_ISL_526982, EPI_ISL_526983, EPI_ISL_526984, EPI_ISL_526985, EPI_ISL_526986, EPI_ISL_526987, EPI_ISL_526988, EPI_ISL_526989, EPI_ISL_526990, EPI_ISL_526991, EPI_ISL_526992, EPI_ISL_526993, EPI_ISL_526994, EPI_ISL_526995, EPI_ISL_526996                                                                                                                                                                                 |                                                                        |                                                                        |                                                                                                                                                                                                                                                                                                        |
| see above                                                                                                                                                                                                                                                                                                                                                                                                                                                                                                                                      | Biological prevention, army                                            | Biological prevention, army                                            | Seadawy, M.G., Gad, A.F., Harty, B.E., Elhoseny, M.F., Shamel, M.D.                                                                                                                                                                                                                                    |
| EPI_ISL_526997, EPI_ISL_526998                                                                                                                                                                                                                                                                                                                                                                                                                                                                                                                 | Biological prevention, army                                            | Biological prevention, army                                            | Seadawy, M.G., Harty,B.E., Gad,A.F., Elhoseiny,M.F., Shamel,M.D., Shabaan,A.E., Ageez,A.M.                                                                                                                                                                                                             |
| EPI_ISL_526999, EPI_ISL_527000, EPI_ISL_527001                                                                                                                                                                                                                                                                                                                                                                                                                                                                                                 | Biological prevention, army                                            | Biological prevention, army                                            | Seadawy,M.G., Harty,B.E., Gad,A.F., Elhoseiny,M.F., Shamel,M.D., Shabaan,A.E., Ageez,A.M.                                                                                                                                                                                                              |
| EPI_ISL_527002                                                                                                                                                                                                                                                                                                                                                                                                                                                                                                                                 | Biological prevention, army                                            | Biological prevention, army                                            | Seadawy, M.G., Harty,B.E., Gad,A.F., Elhoseiny,M.F., Shamel,M.D., Shabaan,A.E., Ageez,A.M.                                                                                                                                                                                                             |
| EPI_ISL_527003, EPI_ISL_527004, EPI_ISL_527005, EPI_ISL_527006                                                                                                                                                                                                                                                                                                                                                                                                                                                                                 | Biological prevention, army                                            | Biological prevention, army                                            | Seadawy,M.G., Harty,B.E., Gad,A.F., Elhoseiny,M.F., Shamel,M.D., Shabaan,A.E., Ageez,A.M.                                                                                                                                                                                                              |
| EPI_ISL_527007                                                                                                                                                                                                                                                                                                                                                                                                                                                                                                                                 | Biological Prevention, Army                                            | Biological Prevention, Army                                            | Seadawy, M.G., Harty,B.E., Gad,A.F., Elhoseiny,M.F., Shamel,M.D., Shabaan,A.E., Ageez,A.M.                                                                                                                                                                                                             |
| EPI_ISL_528386                                                                                                                                                                                                                                                                                                                                                                                                                                                                                                                                 | Viral vaccines, VSVRI- Veterinary serum and vaccine research institute | Viral vaccines, VSVRI- Veterinary serum and vaccine research institute | Saleh,A.A., Saad,M.A.                                                                                                                                                                                                                                                                                  |
| EPI_ISL_529141, EPI_ISL_529142, EPI_ISL_529143, EPI_ISL_529144, EPI_ISL_529145                                                                                                                                                                                                                                                                                                                                                                                                                                                                 | Egyptian National Cancer Institute (ENCI)                              | Egyptian National Cancer Institute (ENCI)                              | Zekri, Abdel Rahman N., Amer,K.E., Ahmed,O.S., Soliman,H.K., Ali,M.A., Hassan,W.A., Mahmoud,A.A., Khattab,A.A., Hafez,M.M., Abouelhoda, Mohamed                                                                                                                                                        |
| EPI_ISL_576371, EPI_ISL_576372, EPI_ISL_576373                                                                                                                                                                                                                                                                                                                                                                                                                                                                                                 | Cancer Biology Department, National Cancer Institute                   | Cancer Biology Department, National Cancer Institute                   | Zekri,A.N., Soliman,H.K., Ahmed,O.S., Hafez,M.M., Hamdy,M.S., Abouelhoda,M.                                                                                                                                                                                                                            |
| EPI_ISL_794634                                                                                                                                                                                                                                                                                                                                                                                                                                                                                                                                 | Biology, MCL                                                           | Biology, MCL                                                           | Seadawy,M.G., Shamel,M.D., EL-hosieny,M.F., Gad,A.F., EL-harty,B.S. and EL-Safty,A.S.                                                                                                                                                                                                                  |
| EPI_ISL_812802, EPI_ISL_812805, EPI_ISL_812807, EPI_ISL_812809, EPI_ISL_812810, EPI_ISL_812811, EPI_ISL_812812, EPI_ISL_812814, EPI_ISL_812815, EPI_ISL_812819, EPI_ISL_812821, EPI_ISL_812823, EPI_ISL_812825, EPI_ISL_812827, EPI_ISL_812828, EPI_ISL_812830, EPI_ISL_812834, EPI_ISL_812835, EPI_ISL_812841, EPI_ISL_812843, EPI_ISL_812844, EPI_ISL_812845, EPI_ISL_812846, EPI_ISL_812849, EPI_ISL_812851, EPI_ISL_812852, EPI_ISL_812857, EPI_ISL_812859, EPI_ISL_812865, EPI_ISL_812867, EPI_ISL_812869, EPI_ISL_812870, EPI_ISL_812871 |                                                                        |                                                                        |                                                                                                                                                                                                                                                                                                        |
| see above                                                                                                                                                                                                                                                                                                                                                                                                                                                                                                                                      | Genomics Program, Children Cancer Hospital                             | Genomics Program, Children Cancer Hospital                             | Hatem,A., Hadad,A., Abouelnaga,S., Amer,K., Salah,H., Farawyla,H., Halafawy,A., Mansour,T., shalaby,L., Hassan,W., Soliman,M., Gomaa,C., Hassan,R., Soliman,S., Monuir,G., Hammad,M., Hussein,S., Abdo,I., Jalal,D., El-Zayat,M., El-Shaqnqery,H., Diab,A., Bakry,U., Samir,O., Magdeldin,S., Sayed,A. |
| EPI_ISL_907076                                                                                                                                                                                                                                                                                                                                                                                                                                                                                                                                 | Biology, MCL                                                           | Biology, MCL                                                           | Seadawy,M.G., Zekri,A.N., Shamel,M.D., Gad,A.F., Elhoseiny,M.F.                                                                                                                                                                                                                                        |
| EPI_ISL_907077, EPI_ISL_907078, EPI_ISL_907079, EPI_ISL_907080, EPI_ISL_907081, EPI_ISL_907082, EPI_ISL_907083, EPI_ISL_907084, EPI_ISL_907085                                                                                                                                                                                                                                                                                                                                                                                                 | Biology, MCL                                                           | Biology, MCL                                                           | Seadawy,M.G., Shamel,M.D., Gad,A.F., Elhoseiny,M.F., Zekri,A.N.                                                                                                                                                                                                                                        |
