# Supplementary material for: Rapid evaluation of COVID-19 vaccine effectiveness against VOC/VOIs by genetic mismatch
Source: bioRxiv or medRxiv preprint supplement (doi:10.1101/2021.04.22.21254079), 2021-11-26
Supplement: Supplementary file [file media-2.zip]

We gratefully acknowledge the following Authors from the Originating laboratories responsible for obtaining the specimens, as well as the Submitting laboratories where the genome data were generated and shared via GISAID, on which this research is based.

All Submitters of data may be contacted directly via [www.gisaid.org](http://www.gisaid.org)

Authors are sorted alphabetically.

| Accession ID                   | Originating Laboratory                                             | Submitting Laboratory                                       | Authors                                                                                                                                  |
|--------------------------------|--------------------------------------------------------------------|-------------------------------------------------------------|------------------------------------------------------------------------------------------------------------------------------------------|
| EPI_ISL_709542                 | National Institute of Blood Diseases (NIBD), Molecular Biology Lab | Genomics Lab NIBD                                           | Samina Naz Mukry, Sayed Ali Raza, Shariq Ahmed, Aneeta Shahni, Gul Sufaida, Arshi Naz , Tahir Sultan Shamsi                              |
| EPI_ISL_757285, EPI_ISL_757286 | Department of Virology, Public Health Laboratories Division        | Department of Virology, Public Health Laboratories Division | Massab Umair, Aamer Ikram, Muhammad Salman                                                                                               |
| EPI_ISL_766055                 | Department of Virology                                             | Department of Virology                                      | Massab Umair, Muhammad Salman, Sana Tamim, Nazish Badar, Zaira Rehman, Adnan Khurshid, Samee Ullah, Abdul Ahad, Hamza Ahmed, Aamer Ikram |
