# Supplementary material for: Rapid evaluation of COVID-19 vaccine effectiveness against VOC/VOIs by genetic mismatch
Source: bioRxiv or medRxiv preprint supplement (doi:10.1101/2021.04.22.21254079), 2021-11-26
Supplement: Supplementary file [file media-2.zip]

We gratefully acknowledge the following Authors from the Originating laboratories responsible for obtaining the specimens, as well as the Submitting laboratories where the genome data were generated and shared via GISAID, on which this research is based.

All Submitters of data may be contacted directly via [www.gisaid.org](http://www.gisaid.org)

Authors are sorted alphabetically.

| Accession ID                                                                                                                                                                                                                                                                                                                                                                                                                                                                                                                                                                                                                                                                                                                                                                                                                                                                                                                                                                                                                                                                                                                                                                                                                                                                                                                                                                                                                                                                                                                                                                                                                                                                                                                                                                                                                                                                                                                                                                                                                                                                                                                                                                                                                                                                                                                                                                                                                                                                                                                                                                                                                                                                                                                                                                                                                                                                                                                                                                                                                                                                                                                                                                                                                                                                                                                                                                                                                                                                                                                                                                                                                                                                                       | Originating Laboratory                                                                      | Submitting Laboratory                                                                                      | Authors                                                                                                                                                                                                        |
|----------------------------------------------------------------------------------------------------------------------------------------------------------------------------------------------------------------------------------------------------------------------------------------------------------------------------------------------------------------------------------------------------------------------------------------------------------------------------------------------------------------------------------------------------------------------------------------------------------------------------------------------------------------------------------------------------------------------------------------------------------------------------------------------------------------------------------------------------------------------------------------------------------------------------------------------------------------------------------------------------------------------------------------------------------------------------------------------------------------------------------------------------------------------------------------------------------------------------------------------------------------------------------------------------------------------------------------------------------------------------------------------------------------------------------------------------------------------------------------------------------------------------------------------------------------------------------------------------------------------------------------------------------------------------------------------------------------------------------------------------------------------------------------------------------------------------------------------------------------------------------------------------------------------------------------------------------------------------------------------------------------------------------------------------------------------------------------------------------------------------------------------------------------------------------------------------------------------------------------------------------------------------------------------------------------------------------------------------------------------------------------------------------------------------------------------------------------------------------------------------------------------------------------------------------------------------------------------------------------------------------------------------------------------------------------------------------------------------------------------------------------------------------------------------------------------------------------------------------------------------------------------------------------------------------------------------------------------------------------------------------------------------------------------------------------------------------------------------------------------------------------------------------------------------------------------------------------------------------------------------------------------------------------------------------------------------------------------------------------------------------------------------------------------------------------------------------------------------------------------------------------------------------------------------------------------------------------------------------------------------------------------------------------------------------------------------|---------------------------------------------------------------------------------------------|------------------------------------------------------------------------------------------------------------|----------------------------------------------------------------------------------------------------------------------------------------------------------------------------------------------------------------|
| EPI_ISL_1092324, EPI_ISL_1092325, EPI_ISL_1092326, EPI_ISL_1092327, EPI_ISL_1092328, EPI_ISL_1092329, EPI_ISL_1092330, EPI_ISL_1092331, EPI_ISL_1092332, EPI_ISL_1092333, EPI_ISL_1092334, EPI_ISL_1092335, EPI_ISL_1092336, EPI_ISL_1092337, EPI_ISL_1092338, EPI_ISL_1092339, EPI_ISL_1092340, EPI_ISL_1092341, EPI_ISL_1092342, EPI_ISL_1092343, EPI_ISL_1092344, EPI_ISL_1092345, EPI_ISL_1092346, EPI_ISL_1092347, EPI_ISL_1092348, EPI_ISL_1092349, EPI_ISL_1092350, EPI_ISL_1092351, EPI_ISL_1092352, EPI_ISL_1092353, EPI_ISL_1092354, EPI_ISL_1092355, EPI_ISL_1092356, EPI_ISL_1092357, EPI_ISL_1092358, EPI_ISL_1092359, EPI_ISL_1093148, EPI_ISL_1093149, EPI_ISL_1093150, EPI_ISL_1093151, EPI_ISL_1093152, EPI_ISL_1093153, EPI_ISL_1093154, EPI_ISL_1093155, EPI_ISL_1093156, EPI_ISL_1093157, EPI_ISL_1093158, EPI_ISL_1093159, EPI_ISL_1093160, EPI_ISL_1093161, EPI_ISL_1093162, EPI_ISL_1093163, EPI_ISL_1093164, EPI_ISL_1093165, EPI_ISL_1093166, EPI_ISL_1093167, EPI_ISL_1093168, EPI_ISL_1093169, EPI_ISL_1093170, EPI_ISL_1093171, EPI_ISL_1093172, EPI_ISL_1093173, EPI_ISL_1093174, EPI_ISL_1093175                                                                                                                                                                                                                                                                                                                                                                                                                                                                                                                                                                                                                                                                                                                                                                                                                                                                                                                                                                                                                                                                                                                                                                                                                                                                                                                                                                                                                                                                                                                                                                                                                                                                                                                                                                                                                                                                                                                                                                                                                                                                                                                                                                                                                                                                                                                                                                                                                                                                                                                                                                     |                                                                                             |                                                                                                            |                                                                                                                                                                                                                |
| see above                                                                                                                                                                                                                                                                                                                                                                                                                                                                                                                                                                                                                                                                                                                                                                                                                                                                                                                                                                                                                                                                                                                                                                                                                                                                                                                                                                                                                                                                                                                                                                                                                                                                                                                                                                                                                                                                                                                                                                                                                                                                                                                                                                                                                                                                                                                                                                                                                                                                                                                                                                                                                                                                                                                                                                                                                                                                                                                                                                                                                                                                                                                                                                                                                                                                                                                                                                                                                                                                                                                                                                                                                                                                                          | Laboratorio de Referencia Nacional de Virus Respiratorio. Instituto Nacional de Salud Perú  | Laboratorio de Referencia Nacional de Biotecnología y Biología Molecular. Instituto Nacional de Salud Perú | Carlos Padilla Rojas, Karolyn Vega Chozo, Luis Barcena, Priscila Lope Pari, Omar Caceres Rey, Marco Galarza Perez, Maribel Huaranga Nuñez, Johanna Balbuena Torrez, Henri Bailon Calderon, Nancy Rojas Serrano |
| EPI_ISL_1111068                                                                                                                                                                                                                                                                                                                                                                                                                                                                                                                                                                                                                                                                                                                                                                                                                                                                                                                                                                                                                                                                                                                                                                                                                                                                                                                                                                                                                                                                                                                                                                                                                                                                                                                                                                                                                                                                                                                                                                                                                                                                                                                                                                                                                                                                                                                                                                                                                                                                                                                                                                                                                                                                                                                                                                                                                                                                                                                                                                                                                                                                                                                                                                                                                                                                                                                                                                                                                                                                                                                                                                                                                                                                                    | Laboratorio de Referencia Nacional de Enteropatógenos. Instituto Nacional de Salud del Perú | Laboratorio de Referencia Nacional de Enteropatógenos. Instituto Nacional de Salud del Perú                | Ronnie Gavilan Chavez, Junior Caro Castro, Willi Quino Sifuentes, Veronica Hurtado Vela, Iris Silva Molina, Fiorella Orellana Peralta                                                                          |
| EPI_ISL_1111069                                                                                                                                                                                                                                                                                                                                                                                                                                                                                                                                                                                                                                                                                                                                                                                                                                                                                                                                                                                                                                                                                                                                                                                                                                                                                                                                                                                                                                                                                                                                                                                                                                                                                                                                                                                                                                                                                                                                                                                                                                                                                                                                                                                                                                                                                                                                                                                                                                                                                                                                                                                                                                                                                                                                                                                                                                                                                                                                                                                                                                                                                                                                                                                                                                                                                                                                                                                                                                                                                                                                                                                                                                                                                    | Laboratorio de Referencia Nacional de Virus Respiratorio. Instituto Nacional de Salud Perú  | Laboratorio de Referencia Nacional de Enteropatógenos. Instituto Nacional de Salud del Perú                | Ronnie Gavilan Chavez, Junior Caro Castro, Willi Quino Sifuentes, Veronica Hurtado Vela, Iris Silva Molina, Fiorella Orellana Peralta                                                                          |
| EPI_ISL_1111070, EPI_ISL_1111071, EPI_ISL_1111072, EPI_ISL_1111073                                                                                                                                                                                                                                                                                                                                                                                                                                                                                                                                                                                                                                                                                                                                                                                                                                                                                                                                                                                                                                                                                                                                                                                                                                                                                                                                                                                                                                                                                                                                                                                                                                                                                                                                                                                                                                                                                                                                                                                                                                                                                                                                                                                                                                                                                                                                                                                                                                                                                                                                                                                                                                                                                                                                                                                                                                                                                                                                                                                                                                                                                                                                                                                                                                                                                                                                                                                                                                                                                                                                                                                                                                 | Laboratorio de Referencia Nacional de Enteropatógenos. Instituto Nacional de Salud del Perú | Laboratorio de Referencia Nacional de Enteropatógenos. Instituto Nacional de Salud del Perú                | Ronnie Gavilan Chavez, Junior Caro Castro, Willi Quino Sifuentes, Veronica Hurtado Vela, Iris Silva Molina, Fiorella Orellana Peralta                                                                          |
| EPI_ISL_1111132, EPI_ISL_1111133, EPI_ISL_1111134, EPI_ISL_1111135, EPI_ISL_1111136, EPI_ISL_1111137, EPI_ISL_1111138, EPI_ISL_1111139, EPI_ISL_1111140, EPI_ISL_1111141, EPI_ISL_1111142, EPI_ISL_1111143, EPI_ISL_1111144, EPI_ISL_1111145, EPI_ISL_1111146, EPI_ISL_1111147, EPI_ISL_1111148, EPI_ISL_1111149, EPI_ISL_1111150, EPI_ISL_1111151, EPI_ISL_1111152, EPI_ISL_1111153, EPI_ISL_1111154, EPI_ISL_1111155, EPI_ISL_1111156, EPI_ISL_1111157, EPI_ISL_1111158, EPI_ISL_1111159, EPI_ISL_1111160, EPI_ISL_1111161, EPI_ISL_1111162, EPI_ISL_1111163, EPI_ISL_1111164, EPI_ISL_1111165, EPI_ISL_1111166, EPI_ISL_1111167, EPI_ISL_1111168, EPI_ISL_1111169, EPI_ISL_1111170, EPI_ISL_1111171, EPI_ISL_1111172, EPI_ISL_1111173, EPI_ISL_1111174, EPI_ISL_1111175, EPI_ISL_1111176, EPI_ISL_1111177, EPI_ISL_1111178, EPI_ISL_1111179, EPI_ISL_1111180, EPI_ISL_1111181, EPI_ISL_1111182, EPI_ISL_1111183, EPI_ISL_1111184, EPI_ISL_1111185, EPI_ISL_1111186, EPI_ISL_1111187, EPI_ISL_1111188, EPI_ISL_1111189, EPI_ISL_1111190, EPI_ISL_1111191, EPI_ISL_1111192, EPI_ISL_1111193, EPI_ISL_1111194, EPI_ISL_1111195, EPI_ISL_1111196, EPI_ISL_1111197, EPI_ISL_1111198, EPI_ISL_1111199, EPI_ISL_1112000, EPI_ISL_1112001, EPI_ISL_1112002, EPI_ISL_1112003, EPI_ISL_1112004, EPI_ISL_1112005, EPI_ISL_1112006, EPI_ISL_1112007, EPI_ISL_1112008, EPI_ISL_1112009, EPI_ISL_1112010, EPI_ISL_1112011, EPI_ISL_1112012, EPI_ISL_1112013, EPI_ISL_1112014, EPI_ISL_1112015, EPI_ISL_1112016, EPI_ISL_1112017, EPI_ISL_1112018, EPI_ISL_1112019, EPI_ISL_1112020, EPI_ISL_1112021, EPI_ISL_1112022, EPI_ISL_1112023, EPI_ISL_1112024, EPI_ISL_1112025, EPI_ISL_1112026, EPI_ISL_1112027, EPI_ISL_1112028, EPI_ISL_1112029, EPI_ISL_1112030, EPI_ISL_1112031, EPI_ISL_1112032, EPI_ISL_1112033, EPI_ISL_1112034, EPI_ISL_1112035, EPI_ISL_1112036, EPI_ISL_1112037, EPI_ISL_1112038, EPI_ISL_1112039, EPI_ISL_1112040, EPI_ISL_1112041, EPI_ISL_1112042, EPI_ISL_1112043, EPI_ISL_1112044, EPI_ISL_1112045, EPI_ISL_1112046, EPI_ISL_1112047, EPI_ISL_1112048, EPI_ISL_1112049, EPI_ISL_1112050, EPI_ISL_1112051, EPI_ISL_1112052, EPI_ISL_1112053, EPI_ISL_1112054, EPI_ISL_1112055, EPI_ISL_1112056, EPI_ISL_1112057, EPI_ISL_1112058, EPI_ISL_1112059, EPI_ISL_1112060, EPI_ISL_1112061, EPI_ISL_1112062, EPI_ISL_1112063, EPI_ISL_1112064, EPI_ISL_1112065, EPI_ISL_1112066, EPI_ISL_1112067, EPI_ISL_1112068, EPI_ISL_1112069, EPI_ISL_1112070, EPI_ISL_1112071, EPI_ISL_1112072, EPI_ISL_1112073, EPI_ISL_1112074, EPI_ISL_1112075, EPI_ISL_1112076, EPI_ISL_1112077, EPI_ISL_1112078, EPI_ISL_1112079, EPI_ISL_1112080, EPI_ISL_1112081, EPI_ISL_1112082, EPI_ISL_1112083, EPI_ISL_1112084, EPI_ISL_1112085, EPI_ISL_1112086, EPI_ISL_1112087, EPI_ISL_1112088, EPI_ISL_1112089, EPI_ISL_1112090, EPI_ISL_1112091, EPI_ISL_1112092, EPI_ISL_1112093, EPI_ISL_1112094, EPI_ISL_1112095, EPI_ISL_1112096, EPI_ISL_1112097, EPI_ISL_1112098, EPI_ISL_1112099, EPI_ISL_1112100, EPI_ISL_1112101, EPI_ISL_1112102, EPI_ISL_1112103, EPI_ISL_1112104, EPI_ISL_1112105, EPI_ISL_1112106, EPI_ISL_1112107, EPI_ISL_1112108, EPI_ISL_1112109, EPI_ISL_1112110, EPI_ISL_1112111, EPI_ISL_1112112, EPI_ISL_1112113, EPI_ISL_1112114, EPI_ISL_1112115, EPI_ISL_1112116, EPI_ISL_1112117, EPI_ISL_1112118, EPI_ISL_1112119, EPI_ISL_1112120, EPI_ISL_1112121, EPI_ISL_1112122, EPI_ISL_1112123, EPI_ISL_1112124, EPI_ISL_1112125, EPI_ISL_1112126, EPI_ISL_1112127, EPI_ISL_1112128, EPI_ISL_1112129, EPI_ISL_1112130, EPI_ISL_1112131, EPI_ISL_1112132, EPI_ISL_1112133, EPI_ISL_1112134, EPI_ISL_1112135, EPI_ISL_1112136, EPI_ISL_1112137, EPI_ISL_1112138, EPI_ISL_1112139, EPI_ISL_1112140, E |                                                                                             |                                                                                                            |                                                                                                                                                                                                                |
