# Supplementary material for: Rapid evaluation of COVID-19 vaccine effectiveness against VOC/VOIs by genetic mismatch
Source: bioRxiv or medRxiv preprint supplement (doi:10.1101/2021.04.22.21254079), 2021-11-26
Supplement: Supplementary file [file media-2.zip]

We gratefully acknowledge the following Authors from the Originating laboratories responsible for obtaining the specimens, as well as the Submitting laboratories where the genome data were generated and shared via GISAID, on which this research is based.

All Submitters of data may be contacted directly via [www.gisaid.org](http://www.gisaid.org)

Authors are sorted alphabetically.

[illegible]
