# Supplementary material for: Rapid evaluation of COVID-19 vaccine effectiveness against VOC/VOIs by genetic mismatch
Source: bioRxiv or medRxiv preprint supplement (doi:10.1101/2021.04.22.21254079), 2021-11-26
Supplement: Supplementary file [file media-2.zip]

We gratefully acknowledge the following Authors from the Originating laboratories responsible for obtaining the specimens, as well as the Submitting laboratories where the genome data were generated and shared via GISAID, on which this research is based.

All Submitters of data may be contacted directly via [www.gisaid.org](http://www.gisaid.org)

Authors are sorted alphabetically.

| Accession ID                                                                                                                                                                                                                                                                                                                                                                                                                                                                                                                                                                                                                                                                                                                                                                                                                                                                                                                                                                                                                                                                                                                                                                                                                                          | Originating Laboratory                                                                                 | Submitting Laboratory                                                                                                                            | Authors                                                                                                                                                                                                                                                                                                                                |
|-------------------------------------------------------------------------------------------------------------------------------------------------------------------------------------------------------------------------------------------------------------------------------------------------------------------------------------------------------------------------------------------------------------------------------------------------------------------------------------------------------------------------------------------------------------------------------------------------------------------------------------------------------------------------------------------------------------------------------------------------------------------------------------------------------------------------------------------------------------------------------------------------------------------------------------------------------------------------------------------------------------------------------------------------------------------------------------------------------------------------------------------------------------------------------------------------------------------------------------------------------|--------------------------------------------------------------------------------------------------------|--------------------------------------------------------------------------------------------------------------------------------------------------|----------------------------------------------------------------------------------------------------------------------------------------------------------------------------------------------------------------------------------------------------------------------------------------------------------------------------------------|
| EPI_ISL_1005559, EPI_ISL_1005560, EPI_ISL_1005561, EPI_ISL_1005562, EPI_ISL_1005563, EPI_ISL_1005564, EPI_ISL_1005565, EPI_ISL_1005566, EPI_ISL_1005567, EPI_ISL_1005568, EPI_ISL_1005569, EPI_ISL_1005570, EPI_ISL_1005571, EPI_ISL_1005572, EPI_ISL_1005573, EPI_ISL_1005574, EPI_ISL_1005575, EPI_ISL_1005576, EPI_ISL_1005577, EPI_ISL_1005578, EPI_ISL_1005579, EPI_ISL_1005580, EPI_ISL_1005581, EPI_ISL_1005582, EPI_ISL_1005586, EPI_ISL_1005657, EPI_ISL_1005658, EPI_ISL_1005659, EPI_ISL_1005660, EPI_ISL_1005661, EPI_ISL_1005662, EPI_ISL_1005663, EPI_ISL_1005664, EPI_ISL_1005665, EPI_ISL_1005666, EPI_ISL_1005667, EPI_ISL_1005668, EPI_ISL_1005669, EPI_ISL_1005670, EPI_ISL_1005671, EPI_ISL_1005672, EPI_ISL_1005673                                                                                                                                                                                                                                                                                                                                                                                                                                                                                                              |                                                                                                        |                                                                                                                                                  |                                                                                                                                                                                                                                                                                                                                        |
| see above                                                                                                                                                                                                                                                                                                                                                                                                                                                                                                                                                                                                                                                                                                                                                                                                                                                                                                                                                                                                                                                                                                                                                                                                                                             | Instituto Nacional de Medicina Genómica                                                                | Instituto Nacional de Medicina Genómica                                                                                                          | Hidalgo-Miranda A, Mendoza-Vargas A, Reyes-Grajeda JP, Cisneros-Villanueva M, Cedro-Tanda A,Peñaloza-Figueroa F, Herrera-Montalvo LA                                                                                                                                                                                                   |
| EPI_ISL_1040544, EPI_ISL_1040545, EPI_ISL_1040546, EPI_ISL_1040547, EPI_ISL_1040548, EPI_ISL_1040549, EPI_ISL_1040550, EPI_ISL_1040551, EPI_ISL_1040552, EPI_ISL_1040553, EPI_ISL_1040554, EPI_ISL_1040555, EPI_ISL_1040556, EPI_ISL_1040557, EPI_ISL_1040558, EPI_ISL_1040559, EPI_ISL_1040560, EPI_ISL_1040561, EPI_ISL_1040562, EPI_ISL_1040563, EPI_ISL_1040564, EPI_ISL_1040565, EPI_ISL_1040566, EPI_ISL_1040567, EPI_ISL_1040568, EPI_ISL_1040569, EPI_ISL_1040570, EPI_ISL_1040571, EPI_ISL_1040572, EPI_ISL_1040573, EPI_ISL_1040574, EPI_ISL_1040575, EPI_ISL_1040576, EPI_ISL_1040577, EPI_ISL_1040578, EPI_ISL_1040579, EPI_ISL_1040580, EPI_ISL_1040581, EPI_ISL_1040582, EPI_ISL_1040583, EPI_ISL_1040584, EPI_ISL_1040585, EPI_ISL_1040586, EPI_ISL_1040587, EPI_ISL_1040588, EPI_ISL_1040589, EPI_ISL_1040590, EPI_ISL_1040591, EPI_ISL_1040592, EPI_ISL_1040593, EPI_ISL_1040594, EPI_ISL_1040595, EPI_ISL_1040596, EPI_ISL_1040597, EPI_ISL_1040598, EPI_ISL_1040599, EPI_ISL_1040600, EPI_ISL_1040602, EPI_ISL_1040603, EPI_ISL_1040611, EPI_ISL_1040612, EPI_ISL_1040613, EPI_ISL_1040614, EPI_ISL_1040615, EPI_ISL_1040616, EPI_ISL_1040617, EPI_ISL_1040618, EPI_ISL_1040619, EPI_ISL_1040620, EPI_ISL_1040621, EPI_ISL_1040622 |                                                                                                        |                                                                                                                                                  |                                                                                                                                                                                                                                                                                                                                        |
| see above                                                                                                                                                                                                                                                                                                                                                                                                                                                                                                                                                                                                                                                                                                                                                                                                                                                                                                                                                                                                                                                                                                                                                                                                                                             | Instituto Nacional de Medicina Genómica                                                                | Instituto Nacional de Medicina Genómica                                                                                                          | Hidalgo-Miranda A, Mendoza-Vargas A, Reyes-Grajeda JP, Cisneros-Villanueva M, Cedro-Tanda A,Peñaloza-Figueroa F, Alcaraz-Millman M,Herrera-Montalvo LA                                                                                                                                                                                 |
| EPI_ISL_1040927                                                                                                                                                                                                                                                                                                                                                                                                                                                                                                                                                                                                                                                                                                                                                                                                                                                                                                                                                                                                                                                                                                                                                                                                                                       | Biología molecular de enfermedades emergentes y EPOC, Instituto Nacional de Enfermedades Respiratorias | Biología molecular de enfermedades emergentes y EPOC, Instituto Nacional de Enfermedades Respiratorias                                           | Vazquez-Perez Joel Armando, Mejia-Nepomuceno Fidencio, Hernández-Teran Alejandra, Serna Ricardo, Salas-Hernández Jorge, Wong-Arambula Claudia, Rodríguez-Maldonado Abril, Perez-Padilla Rogelio, Ramirez-Gonzalez Ernesto                                                                                                              |
| EPI_ISL_1060612, EPI_ISL_1060613, EPI_ISL_1060614, EPI_ISL_1060615                                                                                                                                                                                                                                                                                                                                                                                                                                                                                                                                                                                                                                                                                                                                                                                                                                                                                                                                                                                                                                                                                                                                                                                    | Instituto Nacional de Medicina Genómica                                                                | Instituto Nacional de Medicina Genómica                                                                                                          | Hidalgo-Miranda A, Mendoza-Vargas A, Reyes-Grajeda JP, Cedro-Tanda A, Alcaraz N, Gonzalez-Barrera D, Rangel-DeLeon D, Ramirez-Vega O, Sifuentes-Rojas C, Cisneros-Villanueva M, Herrera-Montalvo LA                                                                                                                                    |
| EPI_ISL_1060676, EPI_ISL_1060677, EPI_ISL_1060678, EPI_ISL_1060679, EPI_ISL_1060680, EPI_ISL_1060681, EPI_ISL_1060682, EPI_ISL_1060683, EPI_ISL_1060686, EPI_ISL_1060688, EPI_ISL_1060689, EPI_ISL_1060690, EPI_ISL_1060691, EPI_ISL_1060692, EPI_ISL_1060693, EPI_ISL_1060694, EPI_ISL_1060696, EPI_ISL_1060697, EPI_ISL_1060699, EPI_ISL_1060701, EPI_ISL_1060703, EPI_ISL_1060704, EPI_ISL_1060705, EPI_ISL_1060706, EPI_ISL_1060707, EPI_ISL_1060709, EPI_ISL_1060710, EPI_ISL_1060712, EPI_ISL_1060713, EPI_ISL_1060718, EPI_ISL_1060719, EPI_ISL_1060720, EPI_ISL_1060721, EPI_ISL_1060722, EPI_ISL_1060723, EPI_ISL_1060724, EPI_ISL_1060725, EPI_ISL_1060726, EPI_ISL_1060727, EPI_ISL_1060728, EPI_ISL_1060729, EPI_ISL_1060730                                                                                                                                                                                                                                                                                                                                                                                                                                                                                                              |                                                                                                        |                                                                                                                                                  |                                                                                                                                                                                                                                                                                                                                        |
| see above                                                                                                                                                                                                                                                                                                                                                                                                                                                                                                                                                                                                                                                                                                                                                                                                                                                                                                                                                                                                                                                                                                                                                                                                                                             | Instituto de Diagnostico y Referencia Epidemiologicos (INDRE)_RNLS P                                   | Instituto de Diagnostico y Referencia Epidemiologicos (INDRE)                                                                                    | Claudia Wong-Arambula, Abril Rodriguez-Maldonado, Fabiola Garces-Ayala, Adnan Araiza-Rodriguez, David Fragoos-Fonseca, Sergio Rangel-Guerrero, Mayra Jimenez-Morales, Nancy Munoz-Hernandez, Natividad Cruz-Ortiz, Tatiana Nunez-Garcia, Gisela Barrera-Badillo, Lucia Hernandez-Rivas, Irma Lopez-Martinez, Ernesto Ramirez-Gonzalez. |
| EPI_ISL_1075657                                                                                                                                                                                                                                                                                                                                                                                                                                                                                                                                                                                                                                                                                                                                                                                                                                                                                                                                                                                                                                                                                                                                                                                                                                       | Instituto Nacional de Medicina Genómica                                                                | Instituto Nacional de Medicina Genómica                                                                                                          | Hidalgo-Miranda A, Mendoza-Vargas A, Reyes-Grajeda JP, Cedro-Tanda A, Alcaraz N, Gonzalez-Barrera D, Rangel-DeLeon D, Ramirez-Vega O, Sifuentes-Rojas C, Cisneros-Villanueva M, Herrera-Montalvo LA.                                                                                                                                   |
| EPI_ISL_1081416                                                                                                                                                                                                                                                                                                                                                                                                                                                                                                                                                                                                                                                                                                                                                                                                                                                                                                                                                                                                                                                                                                                                                                                                                                       | Sharp HealthCare Laboratory                                                                            | Andersen lab at Scripps Research                                                                                                                 | SEARCH Alliance San Diego with Aaron Harding, Jacquelyn Berumen, Cathy Woerle, Liam McGinnis, Art Mendoza, Omid Bakhtar                                                                                                                                                                                                                |
| EPI_ISL_1081423, EPI_ISL_1081424, EPI_ISL_1081425, EPI_ISL_1081426, EPI_ISL_1081427, EPI_ISL_1081428, EPI_ISL_1081429, EPI_ISL_1081430, EPI_ISL_1081431, EPI_ISL_1081432, EPI_ISL_1081433, EPI_ISL_1081434, EPI_ISL_1081435, EPI_ISL_1081436, EPI_ISL_1081437, EPI_ISL_1081438, EPI_ISL_1081439, EPI_ISL_1081440, EPI_ISL_1081441, EPI_ISL_1081442, EPI_ISL_1081443, EPI_ISL_1081444, EPI_ISL_1081445, EPI_ISL_1081446, EPI_ISL_1081447, EPI_ISL_1081448, EPI_ISL_1081449, EPI_ISL_1081450, EPI_ISL_1081451, EPI_ISL_1081452, EPI_ISL_1081453, EPI_ISL_1081454, EPI_ISL_1081455, EPI_ISL_1081456, EPI_ISL_1081473, EPI_ISL_1081474, EPI_ISL_1081475, EPI_ISL_1081476, EPI_ISL_1081477, EPI_ISL_1081478, EPI_ISL_1081479, EPI_ISL_1081480, EPI_ISL_1081481, EPI_ISL_1081482, EPI_ISL_1081483, EPI_ISL_1081484, EPI_ISL_1081485, EPI_ISL_1081486, EPI_ISL_1081487, EPI_ISL_1081488, EPI_ISL_1081489, EPI_ISL_1081490, EPI_ISL_1081491, EPI_ISL_1081492, EPI_ISL_1081493, EPI_ISL_1081494, EPI_ISL_1081495                                                                                                                                                                                                                                               |                                                                                                        |                                                                                                                                                  |                                                                                                                                                                                                                                                                                                                                        |
| see above                                                                                                                                                                                                                                                                                                                                                                                                                                                                                                                                                                                                                                                                                                                                                                                                                                                                                                                                                                                                                                                                                                                                                                                                                                             | Genómica Lab Molecular, MØxico                                                                         | Andersen lab at Scripps Research                                                                                                                 | SEARCH Alliance San Diego with Jonathan Gonzalez Garcia, Jose Roman Chavez Mendez, Jose Horacio Reyna Verdugo, Martin Gonzalez Ibarra, Luis Alberto Rangel Gonzalez                                                                                                                                                                    |
| EPI_ISL_1081506, EPI_ISL_1081544                                                                                                                                                                                                                                                                                                                                                                                                                                                                                                                                                                                                                                                                                                                                                                                                                                                                                                                                                                                                                                                                                                                                                                                                                      | Sharp HealthCare Laboratory                                                                            | Andersen lab at Scripps Research                                                                                                                 | SEARCH Alliance San Diego with Aaron Harding, Jacquelyn Berumen, Cathy Woerle, Liam McGinnis, Art Mendoza, Omid Bakhtar                                                                                                                                                                                                                |
| EPI_ISL_1091241, EPI_ISL_1091242, EPI_ISL_1091244, EPI_ISL_1091245                                                                                                                                                                                                                                                                                                                                                                                                                                                                                                                                                                                                                                                                                                                                                                                                                                                                                                                                                                                                                                                                                                                                                                                    | Laboratorio Estatal de Salud Pública de Nuevo León                                                     | Laboratorio de Infectología Molecular, Departamento de Bioquímica y Medicina Molecular,Facultad de Medicina - Universidad Autónoma de Nuevo León | Kame A. Galán-Huerta, María F. Herrera-Saldivar, Natalia Martínez-Acuña, Sonia A. Lozano-Sepúlveda, Daniel Arellanos-Soto, Ana M. Rivas-Estilla, Samuel Buentello-Wong, Else del Carmen García-García, Gloria A. Jasso-de-la-Peña, Roberto Montes-de-Oca, Consuelo Treviño-Garza, Manuel E. de-la-O-Cavazos                            |
| EPI_ISL_1091247, EPI_ISL_1091248                                                                                                                                                                                                                                                                                                                                                                                                                                                                                                                                                                                                                                                                                                                                                                                                                                                                                                                                                                                                                                                                                                                                                                                                                      | Laboratorio PGM                                                                                        | Laboratorio de Infectología Molecular, Departamento de Bioquímica y Medicina Molecular,Facultad de Medicina - Universidad Autónoma de Nuevo León | Kame A. Galán-Huerta, María F. Herrera-Saldivar, Natalia Martínez-Acuña, Sonia A. Lozano-Sepúlveda, Daniel Arellanos-Soto, Ana M. Rivas-Estilla, Javier Ramos-Jimenez, Gabriela Elizondo, Eduardo Garza-de-la-Peña                                                                                                                     |
| EPI_ISL_1091249                                                                                                                                                                                                                                                                                                                                                                                                                                                                                                                                                                                                                                                                                                                                                                                                                                                                                                                                                                                                                                                                                                                                                                                                                                       | Laboratorio Estatal de Salud Pública de Nuevo León                                                     | Laboratorio de Infectología Molecular, Departamento de Bioquímica y Medicina Molecular,Facultad de Medicina - Universidad Autónoma de Nuevo León | Kame A. Galán-Huerta, María F. Herrera-Saldivar, Natalia Martínez-Acuña, Sonia A. Lozano-Sepúlveda, Daniel Arellanos-Soto, Ana M. Rivas-Estilla, Samuel Buentello-Wong, Else del Carmen García-García, Gloria A. Jasso-de-la-Peña, Roberto Montes-de-Oca, Consuelo Treviño-Garza, Manuel E. de-la-O-Cavazos                            |
| EPI_ISL_1091250, EPI_ISL_1091251, EPI_ISL_1091252                                                                                                                                                                                                                                                                                                                                                                                                                                                                                                                                                                                                                                                                                                                                                                                                                                                                                                                                                                                                                                                                                                                                                                                                     | Laboratorio PGM                                                                                        | Laboratorio de Infectología Molecular, Departamento de Bioquímica y Medicina Molecular,Facultad de Medicina - Universidad Autónoma de Nuevo León | Kame A. Galán-Huerta, María F. Herrera-Saldivar, Natalia Martínez-Acuña, Sonia A. Lozano-Sepúlveda, Daniel Arellanos-Soto, Ana M. Rivas-Estilla, Javier Ramos-Jimenez, Gabriela Elizondo, Eduardo Garza-de-la-Peña                                                                                                                     |
| EPI_ISL_1091253, EPI_ISL_1091254, EPI_ISL_1091255, EPI_ISL_1091256, EPI_ISL_1091257                                                                                                                                                                                                                                                                                                                                                                                                                                                                                                                                                                                                                                                                                                                                                                                                                                                                                                                                                                                                                                                                                                                                                                   | Laboratorio Estatal de Salud Pública de Nuevo León                                                     | Laboratorio de Infectología Molecular, Departamento de Bioquímica y Medicina Molecular,Facultad de Medicina - Universidad Autónoma de Nuevo León | Kame A. Galán-Huerta, María F. Herrera-Saldivar, Natalia Martínez-Acuña, Sonia A. Lozano-Sepúlveda, Daniel Arellanos-Soto, Ana M. Rivas-Estilla, Samuel Buentello-Wong, Else del Carmen García-García, Gloria A. Jasso-de-la-Peña, Roberto Montes-de-Oca, Consuelo Treviño-Garza, Manuel E. de-la-O-Cavazos                            |
| EPI_ISL_1091258, EPI_ISL_1091259, EPI_ISL_1091260                                                                                                                                                                                                                                                                                                                                                                                                                                                                                                                                                                                                                                                                                                                                                                                                                                                                                                                                                                                                                                                                                                                                                                                                     | Laboratorio PGM                                                                                        | Laboratorio de Infectología Molecular, Departamento de Bioquímica y Medicina Molecular,Facultad de Medicina - Universidad Autónoma de Nuevo León | Kame A. Galán-Huerta, María F. Herrera-Saldivar, Natalia Martínez-Acuña, Sonia A. Lozano-Sepúlveda, Daniel Arellanos-Soto, Ana M. Rivas-Estilla, Javier Ramos-Jimenez, Gabriela Elizondo, Eduardo Garza-de-la-Peña                                                                                                                     |
| EPI_ISL_1091262                                                                                                                                                                                                                                                                                                                                                                                                                                                                                                                                                                                                                                                                                                                                                                                                                                                                                                                                                                                                                                                                                                                                                                                                                                       | Laboratorio Estatal de Salud Pública de Nuevo León                                                     | Laboratorio de Infectología Molecular, Departamento de Bioquímica y Medicina Molecular,Facultad de Medicina - Universidad Autónoma de Nuevo León | Kame A. Galán-Huerta, María F. Herrera-Saldivar, Natalia Martínez-Acuña, Sonia A. Lozano-Sepúlveda, Daniel Arellanos-Soto, Ana M. Rivas-Estilla, Samuel Buentello-Wong, Else del Carmen García-García, Gloria A. Jasso-de-la-Peña, Roberto Montes-de-Oca, Consuelo Treviño-Garza, Manuel E. de-la-O-Cavazos                            |
| EPI_ISL_1091263, EPI_ISL_1091264, EPI_ISL_1091265, EPI_ISL_1091266, EPI_ISL_1091267, EPI_ISL_1091268, EPI_ISL_1091269, EPI_ISL_1091270, EPI_ISL_1091271, EPI_ISL_1091273, EPI_ISL_1091274                                                                                                                                                                                                                                                                                                                                                                                                                                                                                                                                                                                                                                                                                                                                                                                                                                                                                                                                                                                                                                                             |                                                                                                        |                                                                                                                                                  |                                                                                                                                                                                                                                                                                                                                        |
| see above                                                                                                                                                                                                                                                                                                                                                                                                                                                                                                                                                                                                                                                                                                                                                                                                                                                                                                                                                                                                                                                                                                                                                                                                                                             | Laboratorio PGM                                                                                        | Laboratorio de Infectología Molecular, Departamento de Bioquímica y Medicina Molecular,Facultad de Medicina - Universidad Autónoma de Nuevo León | Kame A. Galán-Huerta, María F. Herrera-Saldivar, Natalia Martínez-Acuña, Sonia A. Lozano-Sepúlveda, Daniel Arellanos-Soto, Ana M. Rivas-Estilla, Javier Ramos-Jimenez, Gabriela Elizondo, Eduardo Garza-de-la-Peña                                                                                                                     |
| EPI_ISL_1092458                                                                                                                                                                                                                                                                                                                                                                                                                                                                                                                                                                                                                                                                                                                                                                                                                                                                                                                                                                                                                                                                                                                                                                                                                                       | Laboratorio Estatal de Salud Pública de Nuevo León                                                     | Laboratorio de Infectología Molecular, Departamento de Bioquímica y Medicina Molecular,Facultad de Medicina - Universidad Autónoma de Nuevo León | Kame A. Galán-Huerta, María F. Herrera-Saldivar, Natalia Martínez-Acuña, Sonia A. Lozano-Sepúlveda, Daniel Arellanos-Soto, Ana M. Rivas-Estilla, Samuel Buentello-Wong, Else del Carmen García-García, Gloria A. Jasso-de-la-Peña, Roberto Montes-de-Oca, Consuelo Treviño-Garza, Manuel E. de-la-O-Cavazos                            |
| EPI_ISL_1093145, EPI_ISL_1093146, EPI_ISL_1093147                                                                                                                                                                                                                                                                                                                                                                                                                                                                                                                                                                                                                                                                                                                                                                                                                                                                                                                                                                                                                                                                                                                                                                                                     | Laboratorio de Diagnostico de Enfermedades Emergentes y Reemergentes                                   | Instituto de Diagnostico y Referencia Epidemiologicos (INDRE)                                                                                    | Claudia Wong-Arambula, Abril Rodriguez-Maldonado, Fabiola Garces-Ayala, Natividad Cruz-Ortiz, Tatiana Nunez-Garcia, Natali Vega-Magana, Gisela Barrera-Badillo, Lucia Hernandez-Rivas, Irma Lopez-Martinez, Ernesto Ramirez-Gonzalez.                                                                                                  |
| EPI_ISL_1095516                                                                                                                                                                                                                                                                                                                                                                                                                                                                                                                                                                                                                                                                                                                                                                                                                                                                                                                                                                                                                                                                                                                                                                                                                                       | Instituto Nacional de Medicina Genómica                                                                | Instituto Nacional de Medicina Genómica                                                                                                          | Hidalgo-Miranda A, Mendoza-Vargas A, Reyes-Grajeda JP, Cedro-Tanda A, Alcaraz N, Gonzalez-Barrera D, Rangel-DeLeon D, Ramirez-Vega O, Sifuentes-Rojas C, Cisneros-Villanueva M, Herrera-Montalvo LA                                                                                                                                    |

|                                                                                                                                                                                                                                                                                                                                                                                                                                                                                                                                                                                                                                                                                                                                                                                                                                                                                                                                                                                                                                                                                                |                                                                                                                                                                                                                                             |                                                                                                                                                                                                                                                                           |                                                                                                                                                                                                                                                                                                                                                                                                                                                                                                                                                                              |                                                                                                                                                                                                                                                                                                                                        |
|------------------------------------------------------------------------------------------------------------------------------------------------------------------------------------------------------------------------------------------------------------------------------------------------------------------------------------------------------------------------------------------------------------------------------------------------------------------------------------------------------------------------------------------------------------------------------------------------------------------------------------------------------------------------------------------------------------------------------------------------------------------------------------------------------------------------------------------------------------------------------------------------------------------------------------------------------------------------------------------------------------------------------------------------------------------------------------------------|---------------------------------------------------------------------------------------------------------------------------------------------------------------------------------------------------------------------------------------------|---------------------------------------------------------------------------------------------------------------------------------------------------------------------------------------------------------------------------------------------------------------------------|------------------------------------------------------------------------------------------------------------------------------------------------------------------------------------------------------------------------------------------------------------------------------------------------------------------------------------------------------------------------------------------------------------------------------------------------------------------------------------------------------------------------------------------------------------------------------|----------------------------------------------------------------------------------------------------------------------------------------------------------------------------------------------------------------------------------------------------------------------------------------------------------------------------------------|
| EPI_ISL_1096141                                                                                                                                                                                                                                                                                                                                                                                                                                                                                                                                                                                                                                                                                                                                                                                                                                                                                                                                                                                                                                                                                | Departamento de Cuidados Intensivos-Unidad de Investigación Médica en Inmunuquímica, UMAE Hospital de Especialidades "Bernardo Sepúlveda Gutiérrez", Centro Médico Nacional Siglo XXI, Instituto Mexicano del Seguro Social (IMSS), México. | Laboratorio de Secuenciación-Centro de Instrumentos, IMSS México /Unidad de Investigación Médica en Inmunuquímica, UMAE Hospital de Especialidades "Bernardo Sepúlveda Gutiérrez", Centro Médico Nacional Siglo XXI, Instituto Mexicano del Seguro Social (IMSS), México. | Horacio Zamudio-Meza, Javier Gaytán-Cervantes, Carolina González-Torres, Alejandro Torres Flores, Lourdes Arriaga-Pizano, Eduardo Ferat-Osorio, Arturo Cébulo-Vázquez, Luis Sánchez Hurtado, Elizabeth Rubi Duran Castañeda, Jesús Mena López, Juan Carlos Guerrero Escobar, Zuleima Maldonado Galeana, Aura Angélica López García, José Manuel Ruiz Rincón, Joaquín González-Ibarra, César Raúl González-Bonilla, Constantino López-Macias.                                                                                                                                 |                                                                                                                                                                                                                                                                                                                                        |
| EPI_ISL_1096985                                                                                                                                                                                                                                                                                                                                                                                                                                                                                                                                                                                                                                                                                                                                                                                                                                                                                                                                                                                                                                                                                | Departamento de Cuidados Intensivos-Unidad de Investigación Médica en Inmunuquímica, UMAE Hospital de Especialidades "Bernardo Sepúlveda Gutiérrez", Centro Médico Nacional Siglo XXI, Instituto Mexicano del Seguro Social (IMSS) México.  | Laboratorio de Secuenciación-Centro de Instrumentos, IMSS México /Unidad de Investigación Médica en Inmunuquímica, UMAE Hospital de Especialidades "Bernardo Sepúlveda Gutiérrez", Centro Médico Nacional Siglo XXI, Instituto Mexicano del Seguro Social (IMSS), México. | Javier Gaytán-Cervantes, Carolina González-Torres, Horacio Zamudio-Meza, Alejandro Torres Flores, Lourdes Arriaga-Pizano, Eduardo Ferat-Osorio, Arturo Cébulo-Vázquez, Luis Sánchez Hurtado, Elizabeth Rubi Duran Castañeda, Jesús Mena López, Juan Carlos Guerrero Escobar, Zuleima Maldonado Galeana, Aura Angélica López García, José Manuel Ruiz Rincón, Joaquín González-Ibarra, César Raúl González-Bonilla, Constantino López-Macias.                                                                                                                                 |                                                                                                                                                                                                                                                                                                                                        |
| EPI_ISL_1137459, EPI_ISL_1137477                                                                                                                                                                                                                                                                                                                                                                                                                                                                                                                                                                                                                                                                                                                                                                                                                                                                                                                                                                                                                                                               | LABDIS-UAGro                                                                                                                                                                                                                                | Instituto Nacional de Medicina Genomica                                                                                                                                                                                                                                   | Hidalgo-Miranda A, Mendoza-Vargas A, Reyes-Grajeda JP, Cedro-Tanda A, Alcaraz N, Gonzalez-Barrera D, Rangel-DeLeon D, Ramirez-Vega O, Sifuentes-Rojas C, Cisneros-Villanueva M, Herrera-Montalvo LA, Berenice Illades-Aguair, Oscar del Moral-Hernandez, Adolfo Roman-Roman, Marco Antonio-Leyva, Daniel Hernandez-Sotelo, Hugo A. Rodríguez-Ruiz, Fredy O Beltran-Anaya, Roberto Dircio-Maldonado, Julio C. Azucar-Hesiquio, Azucena D. Alvarez-Diaz, Ciresthel Bello-Rios, Gladys W. Valente-Nio, Jaqueline Loeaza-Loaeza, Madian Valadez-Quinones, Luis I. Basilio-Leyva. |                                                                                                                                                                                                                                                                                                                                        |
| EPI_ISL_658863, EPI_ISL_658865, EPI_ISL_658868, EPI_ISL_658870                                                                                                                                                                                                                                                                                                                                                                                                                                                                                                                                                                                                                                                                                                                                                                                                                                                                                                                                                                                                                                 | Instituto de Diagnostico y Referencia Epidemiologicos (INDRE)                                                                                                                                                                               | Instituto de Diagnostico y Referencia Epidemiologicos (INDRE)                                                                                                                                                                                                             | Gisela Barrera-Badillo , Abril Rodriguez-Maldonado, Claudia Wong-Arambula , Natividad Cruz-Ortiz, Tatiana Nunez-Garcia, Dayanira Arellano-Suarez, Fabiola Garces-Ayala, Lucia Hernandez-Rivas, Irma Lopez-Martinez, Ernesto Ramirez-Gonzalez.                                                                                                                                                                                                                                                                                                                                |                                                                                                                                                                                                                                                                                                                                        |
| EPI_ISL_658873, EPI_ISL_658875                                                                                                                                                                                                                                                                                                                                                                                                                                                                                                                                                                                                                                                                                                                                                                                                                                                                                                                                                                                                                                                                 | Instituto de Diagnostico y Referencia Epidemiologicos (INDRE)                                                                                                                                                                               | Instituto de Diagnostico y Referencia Epidemiologicos (INDRE)                                                                                                                                                                                                             | Gisela Barrera-Badillo , Abril Rodriguez-Maldonado, Claudia Wong-Arambula , Natividad Cruz-Ortiz, Tatiana Nunez-Garcia, Dayanira Arellano-Suarez, Fabiola Garces-Ayala, Lucia Hernandez-Rivas, Irma Lopez-Martinez, Ernesto Ramirez-Gonzalez.                                                                                                                                                                                                                                                                                                                                |                                                                                                                                                                                                                                                                                                                                        |
| EPI_ISL_658878, EPI_ISL_658880, EPI_ISL_658883, EPI_ISL_658886, EPI_ISL_658888, EPI_ISL_658891, EPI_ISL_658893, EPI_ISL_658901                                                                                                                                                                                                                                                                                                                                                                                                                                                                                                                                                                                                                                                                                                                                                                                                                                                                                                                                                                 | Instituto de Diagnostico y Referencia Epidemiologicos (INDRE)                                                                                                                                                                               | Instituto de Diagnostico y Referencia Epidemiologicos (INDRE)                                                                                                                                                                                                             | Ernesto Ramirez-Gonzalez, Abril Rodriguez-Maldonado, Claudia Wong-Arambula , Natividad Cruz-Ortiz, Tatiana Nunez-Garcia, Dayanira Arellano-Suarez, Fabiola Garces-Ayala, Lucia Hernandez-Rivas, Irma Lopez-Martinez, Gisela Barrera-Badillo.                                                                                                                                                                                                                                                                                                                                 |                                                                                                                                                                                                                                                                                                                                        |
| EPI_ISL_660068                                                                                                                                                                                                                                                                                                                                                                                                                                                                                                                                                                                                                                                                                                                                                                                                                                                                                                                                                                                                                                                                                 | Instituto de Diagnostico y Referencia Epidemiologicos (INDRE)                                                                                                                                                                               | Instituto de diagnóstico y Referencia Epidemiologicos (INDRE) Departamento de Virología                                                                                                                                                                                   | Gisela Barrera-Badillo , Abril Rodríguez-Maldonado, Claudia Wong-Arambula , Natividad Cruz-Ortiz, Tatiana Nunez-Garcia, Dayanira Arellano-Suarez, Fabiola Garces-Ayala, Lucia Hernandez-Rivas, Irma Lopez-Martinez, Ernesto Ramirez-Gonzalez.                                                                                                                                                                                                                                                                                                                                |                                                                                                                                                                                                                                                                                                                                        |
| EPI_ISL_747243                                                                                                                                                                                                                                                                                                                                                                                                                                                                                                                                                                                                                                                                                                                                                                                                                                                                                                                                                                                                                                                                                 | General Hospital Laboratory                                                                                                                                                                                                                 | Pathogen Laboratory (BSL3), Biomedical Innovation Department, Experimental and Applied Biology Division, Scientific Research Center and High Education from Ensenada (CICESE)                                                                                             | Cervantes-Luevano K., Martinez M.A., Saavedra-Flores A., Galindo C. and Licea-Navarro A.                                                                                                                                                                                                                                                                                                                                                                                                                                                                                     |                                                                                                                                                                                                                                                                                                                                        |
| EPI_ISL_779185, EPI_ISL_779186, EPI_ISL_779187, EPI_ISL_779188, EPI_ISL_779189, EPI_ISL_779190, EPI_ISL_779191, EPI_ISL_779192, EPI_ISL_779193, EPI_ISL_779194, EPI_ISL_779195, EPI_ISL_779196, EPI_ISL_779197, EPI_ISL_779198                                                                                                                                                                                                                                                                                                                                                                                                                                                                                                                                                                                                                                                                                                                                                                                                                                                                 | see above                                                                                                                                                                                                                                   | Laboratorio Estatal de Salud Pública de Nuevo León                                                                                                                                                                                                                        | Kame A. Galán-Huerta, María F. Herrera-Saldivar, Natalia Martínez-Acuña, Sonia A. Lozano-Sepúlveda, Daniel Arellanos-Soto, Ana M. Rivas-Estilla, Samuel Buentello-Wong, Else del Carmen García-García, Gloria A. Jasso-de-la-Peña, Roberto Montes-de-Oca, Consuelo Treviño-Garza, Manuel E. de-la-O-Cavazos                                                                                                                                                                                                                                                                  |                                                                                                                                                                                                                                                                                                                                        |
| EPI_ISL_794592                                                                                                                                                                                                                                                                                                                                                                                                                                                                                                                                                                                                                                                                                                                                                                                                                                                                                                                                                                                                                                                                                 | Laboratorio Estatal de Salud Pública de Tamaulipas                                                                                                                                                                                          | Instituto de diagnóstico y Referencia Epidemiologicos (INDRE)                                                                                                                                                                                                             | Abril Rodríguez-Maldonado, Claudia Wong-Arambula, Fabiola Garces-Ayala, Gisela Barrera-Badillo, Ana Maria Cortez-Calderon, Bernardita Reyes-Berrones, Hilda del Carmen-Selvera, Gloria Molina-Gamboa, Lucia Hernandez-Rivas, Irma Lopez-Martinez, Celia Alpuche-Aranda, Jose Luis Alomia-Zegarra, Hugo Lopez Gatell-Ramirez, Ernesto Ramirez-Gonzalez.                                                                                                                                                                                                                       |                                                                                                                                                                                                                                                                                                                                        |
| EPI_ISL_878212, EPI_ISL_878226, EPI_ISL_878300, EPI_ISL_878367, EPI_ISL_878375, EPI_ISL_878390, EPI_ISL_878400, EPI_ISL_878401, EPI_ISL_878404, EPI_ISL_878408, EPI_ISL_878437, EPI_ISL_879950, EPI_ISL_879977                                                                                                                                                                                                                                                                                                                                                                                                                                                                                                                                                                                                                                                                                                                                                                                                                                                                                 | see above                                                                                                                                                                                                                                   | San Diego County Public Health Laboratory                                                                                                                                                                                                                                 | SEARCH Alliance San Diego with Tracy Basler, Jovan Shephard, Brett Austin                                                                                                                                                                                                                                                                                                                                                                                                                                                                                                    |                                                                                                                                                                                                                                                                                                                                        |
| EPI_ISL_913915, EPI_ISL_913916, EPI_ISL_913920, EPI_ISL_913921, EPI_ISL_913922, EPI_ISL_913923, EPI_ISL_913924, EPI_ISL_913925, EPI_ISL_913926, EPI_ISL_913927, EPI_ISL_913928, EPI_ISL_913929, EPI_ISL_913930, EPI_ISL_913931, EPI_ISL_913932, EPI_ISL_913933, EPI_ISL_913934, EPI_ISL_913935, EPI_ISL_913936, EPI_ISL_913937, EPI_ISL_913938, EPI_ISL_913939, EPI_ISL_913940, EPI_ISL_913941, EPI_ISL_913942, EPI_ISL_913943, EPI_ISL_913944, EPI_ISL_913945, EPI_ISL_913946, EPI_ISL_913947, EPI_ISL_913948, EPI_ISL_913949, EPI_ISL_913950, EPI_ISL_913951, EPI_ISL_913952, EPI_ISL_913953, EPI_ISL_913954, EPI_ISL_913955, EPI_ISL_913957, EPI_ISL_913958, EPI_ISL_913959, EPI_ISL_913960, EPI_ISL_913961, EPI_ISL_913962, EPI_ISL_913963, EPI_ISL_913964, EPI_ISL_913965, EPI_ISL_913966, EPI_ISL_913967, EPI_ISL_913968, EPI_ISL_913970, EPI_ISL_913971, EPI_ISL_913972, EPI_ISL_913973, EPI_ISL_913974, EPI_ISL_913975, EPI_ISL_913976, EPI_ISL_913977, EPI_ISL_913978, EPI_ISL_913979, EPI_ISL_913980, EPI_ISL_913981, EPI_ISL_913982, EPI_ISL_913983, EPI_ISL_913984, EPI_ISL_914880 | see above                                                                                                                                                                                                                                   | Instituto de Diagnostico y Referencia Epidemiologicos (INDRE)                                                                                                                                                                                                             | Claudia Wong-Arambula, Abril Rodriguez-Maldonado, Fabiola Garces-Ayala, Adnan Araiza-Rodriguez, David Fragofo-Fonseca, Sergio Rangel-Guerrero, Mayra Jimenez-Morales, Nancy Munoz-Hernandez, Natividad Cruz-Ortiz, Tatiana Nunez-Garcia, Gisela Barrera-Badillo, Lucia Hernandez-Rivas, Irma Lopez-Martinez, Ernesto Ramirez-Gonzalez.                                                                                                                                                                                                                                       |                                                                                                                                                                                                                                                                                                                                        |
| EPI_ISL_930783, EPI_ISL_933512, EPI_ISL_933513, EPI_ISL_933514, EPI_ISL_933515, EPI_ISL_933516, EPI_ISL_933517, EPI_ISL_933518, EPI_ISL_933519, EPI_ISL_933520, EPI_ISL_933521, EPI_ISL_933522, EPI_ISL_933523, EPI_ISL_933524, EPI_ISL_933525, EPI_ISL_933526, EPI_ISL_933527, EPI_ISL_933528, EPI_ISL_933529, EPI_ISL_933530, EPI_ISL_933531                                                                                                                                                                                                                                                                                                                                                                                                                                                                                                                                                                                                                                                                                                                                                 | see above                                                                                                                                                                                                                                   | Instituto Nacional de Medicina Genómica                                                                                                                                                                                                                                   | Instituto Nacional de Medicina Genómica                                                                                                                                                                                                                                                                                                                                                                                                                                                                                                                                      | Hidalgo-Miranda A, Mendoza-Vargas A, Reyes-Grajeda JP, Cisneros-Villanueva M, Cedro-Tanda A,Peñaloza-Figueroa F, Herrera-Montalvo LA                                                                                                                                                                                                   |
| EPI_ISL_933661, EPI_ISL_933662, EPI_ISL_933663, EPI_ISL_933666, EPI_ISL_933667, EPI_ISL_933668, EPI_ISL_933669, EPI_ISL_933670, EPI_ISL_933671, EPI_ISL_933672, EPI_ISL_933673, EPI_ISL_933674, EPI_ISL_933675, EPI_ISL_933676, EPI_ISL_933677, EPI_ISL_933678, EPI_ISL_933679, EPI_ISL_933680, EPI_ISL_933681, EPI_ISL_933682, EPI_ISL_933683, EPI_ISL_933684, EPI_ISL_933685, EPI_ISL_933686, EPI_ISL_933687, EPI_ISL_933688, EPI_ISL_933689, EPI_ISL_933690, EPI_ISL_933691, EPI_ISL_933692, EPI_ISL_933693, EPI_ISL_933694, EPI_ISL_933695, EPI_ISL_933696, EPI_ISL_933697, EPI_ISL_933698, EPI_ISL_933699, EPI_ISL_933700, EPI_ISL_933701, EPI_ISL_933702, EPI_ISL_933703, EPI_ISL_933704, EPI_ISL_933705, EPI_ISL_933706, EPI_ISL_933707, EPI_ISL_933708, EPI_ISL_933709, EPI_ISL_933710, EPI_ISL_933711, EPI_ISL_933712                                                                                                                                                                                                                                                                 | see above                                                                                                                                                                                                                                   | Instituto de Diagnostico y Referencia Epidemiologicos (INDRE_RNLSP)                                                                                                                                                                                                       | Instituto de Diagnostico y Referencia Epidemiologicos (INDRE)                                                                                                                                                                                                                                                                                                                                                                                                                                                                                                                | Claudia Wong-Arambula, Abril Rodriguez-Maldonado, Fabiola Garces-Ayala, Adnan Araiza-Rodriguez, David Fragofo-Fonseca, Sergio Rangel-Guerrero, Mayra Jimenez-Morales, Nancy Munoz-Hernandez, Natividad Cruz-Ortiz, Tatiana Nunez-Garcia, Gisela Barrera-Badillo, Lucia Hernandez-Rivas, Irma Lopez-Martinez, Ernesto Ramirez-Gonzalez. |
| EPI_ISL_942927                                                                                                                                                                                                                                                                                                                                                                                                                                                                                                                                                                                                                                                                                                                                                                                                                                                                                                                                                                                                                                                                                 | LESP Nuevo Leon/Grupo de Diagnostico ARIES                                                                                                                                                                                                  | Instituto de Diagnostico y Referencia Epidemiologicos (INDRE)                                                                                                                                                                                                             | Claudia Wong-Arambula, Abril Rodriguez-Maldonado, Fabiola Garces-Ayala, Natividad Cruz-Ortiz, Tatiana Nunez-Garcia, Gisela Barrera-Badillo, Lucia Hernandez-Rivas, Irma Lopez-Martinez, Ernesto Ramirez-Gonzalez.                                                                                                                                                                                                                                                                                                                                                            |                                                                                                                                                                                                                                                                                                                                        |
| EPI_ISL_942928                                                                                                                                                                                                                                                                                                                                                                                                                                                                                                                                                                                                                                                                                                                                                                                                                                                                                                                                                                                                                                                                                 | Instituto de Diagnostico y Referencia Epidemiologicos (INDRE_RNLSP)                                                                                                                                                                         | Instituto de Diagnostico y Referencia Epidemiologicos (INDRE)                                                                                                                                                                                                             | Claudia Wong-Arambula, Abril Rodriguez-Maldonado, Fabiola Garces-Ayala, Natividad Cruz-Ortiz, Tatiana Nunez-Garcia, Gisela Barrera-Badillo, Lucia Hernandez-Rivas, Irma Lopez-Martinez, Ernesto Ramirez-Gonzalez.                                                                                                                                                                                                                                                                                                                                                            |                                                                                                                                                                                                                                                                                                                                        |
| EPI_ISL_944611, EPI_ISL_944612, EPI_ISL_944613, EPI_ISL_944614, EPI_ISL_944615, EPI_ISL_944616, EPI_ISL_944617, EPI_ISL_944618, EPI_ISL_944619, EPI_ISL_944620, EPI_ISL_944621, EPI_ISL_944622, EPI_ISL_944623, EPI_ISL_944624, EPI_ISL_944625, EPI_ISL_944626, EPI_ISL_944627, EPI_ISL_944628, EPI_ISL_944629, EPI_ISL_944630, EPI_ISL_944631, EPI_ISL_944632, EPI_ISL_944633, EPI_ISL_955189, EPI_ISL_955190, EPI_ISL_955191, EPI_ISL_955192, EPI_ISL_955193, EPI_ISL_955194, EPI_ISL_955195, EPI_ISL_955196, EPI_ISL_955197, EPI_ISL_955198, EPI_ISL_955199, EPI_ISL_955200, EPI_ISL_955201, EPI_ISL_955202, EPI_ISL_955203, EPI_ISL_955204, EPI_ISL_955205, EPI_ISL_955206, EPI_ISL_955207, EPI_ISL_955208, EPI_ISL_955209                                                                                                                                                                                                                                                                                                                                                                 | see above                                                                                                                                                                                                                                   | Instituto Nacional de Medicina Genómica                                                                                                                                                                                                                                   | Hidalgo-Miranda A, Mendoza-Vargas A, Reyes-Grajeda JP, Cisneros-Villanueva M, Cedro-Tanda A,Peñaloza-Figueroa F, Herrera-Montalvo LA                                                                                                                                                                                                                                                                                                                                                                                                                                         |                                                                                                                                                                                                                                                                                                                                        |
| EPI_ISL_961466                                                                                                                                                                                                                                                                                                                                                                                                                                                                                                                                                                                                                                                                                                                                                                                                                                                                                                                                                                                                                                                                                 | Laboratorios Lister                                                                                                                                                                                                                         | Instituto de Diagnostico y Referencia Epidemiologicos (INDRE)                                                                                                                                                                                                             | Claudia Wong-Arambula, Abril Rodriguez-Maldonado, Fabiola Garces-Ayala, Natividad Cruz-Ortiz, Tatiana Nunez-Garcia, Gisela Barrera-Badillo, Lucia Hernandez-Rivas, Irma Lopez-Martinez, Ernesto Ramirez-Gonzalez.                                                                                                                                                                                                                                                                                                                                                            |                                                                                                                                                                                                                                                                                                                                        |
| EPI_ISL_961467, EPI_ISL_961468, EPI_ISL_961469                                                                                                                                                                                                                                                                                                                                                                                                                                                                                                                                                                                                                                                                                                                                                                                                                                                                                                                                                                                                                                                 | LESP Nuevo Leon/Grupo de Diagnostico ARIES                                                                                                                                                                                                  | Instituto de Diagnostico y Referencia Epidemiologicos (INDRE)                                                                                                                                                                                                             | Claudia Wong-Arambula, Abril Rodriguez-Maldonado, Fabiola Garces-Ayala, Natividad Cruz-Ortiz, Tatiana Nunez-Garcia, Gisela Barrera-Badillo, Lucia Hernandez-Rivas, Irma Lopez-Martinez, Ernesto Ramirez-Gonzalez.                                                                                                                                                                                                                                                                                                                                                            |                                                                                                                                                                                                                                                                                                                                        |
| EPI_ISL_962662, EPI_ISL_962663                                                                                                                                                                                                                                                                                                                                                                                                                                                                                                                                                                                                                                                                                                                                                                                                                                                                                                                                                                                                                                                                 | Sharp HealthCare Laboratory                                                                                                                                                                                                                 | Andersen lab at Scripps Research                                                                                                                                                                                                                                          | SEARCH Alliance San Diego with Aaron Harding, Jacquelyn Berumen, Cathy Woerle, Liam McGinnis, Art Mendoza, Omid Bakhtar                                                                                                                                                                                                                                                                                                                                                                                                                                                      |                                                                                                                                                                                                                                                                                                                                        |
| EPI_ISL_979327, EPI_ISL_979328, EPI_ISL_979329, EPI_ISL_979330, EPI_ISL_979331, EPI_ISL_979332, EPI_ISL_979333, EPI_ISL_979334, EPI_ISL_979335, EPI_ISL_979336, EPI_ISL_979337, EPI_ISL_979338, EPI_ISL_979339, EPI_ISL_979340, EPI_ISL_979341, EPI_ISL_979342, EPI_ISL_979343, EPI_ISL_979344, EPI_ISL_979345, EPI_ISL_979346, EPI_ISL_979347, EPI_ISL_979348, EPI_ISL_979349, EPI_ISL_979350, EPI_ISL_979351, EPI_ISL_979352                                                                                                                                                                                                                                                                                                                                                                                                                                                                                                                                                                                                                                                                 | see above                                                                                                                                                                                                                                   | Laboratorio de Infectología Molecular, Departamento de Bioquímica y Medicina Molecular, Facultad de Medicina - Universidad Autónoma de Nuevo León                                                                                                                         | Kame A. Galán-Huerta, María F. Herrera-Saldivar, Natalia Martínez-Acuña, Sonia A. Lozano-Sepúlveda, Daniel Arellanos-Soto, Ana M. Rivas-Estilla, Samuel Buentello-Wong, Else del Carmen García-García, Gloria A. Jasso-de-la-Peña, Roberto Montes-de-Oca, Consuelo Treviño-Garza, Manuel E. de-la-O-Cavazos                                                                                                                                                                                                                                                                  |                                                                                                                                                                                                                                                                                                                                        |
| EPI_ISL_985149, EPI_ISL_985150, EPI_ISL_985151, EPI_ISL_985152, EPI_ISL_985153, EPI_ISL_985154, EPI_ISL_985155, EPI_ISL_985156, EPI_ISL_985157, EPI_ISL_985158, EPI_ISL_985159, EPI_ISL_985160, EPI_ISL_985161, EPI_ISL_985162, EPI_ISL_985163, EPI_ISL_985164, EPI_ISL_985165, EPI_ISL_985166, EPI_ISL_985167                                                                                                                                                                                                                                                                                                                                                                                                                                                                                                                                                                                                                                                                                                                                                                                 |                                                                                                                                                                                                                                             |                                                                                                                                                                                                                                                                           |                                                                                                                                                                                                                                                                                                                                                                                                                                                                                                                                                                              |                                                                                                                                                                                                                                                                                                                                        |

see above

Instituto Nacional de Medicina Genomica

Instituto Nacional de Medicina Genomica

Hidalgo-Miranda A, Mendoza-Vargas A, Reyes-Grajeda JP, Cisneros-Villanueva M, Cedro-Tanda A,Peñaloza-Figueroa F, Herrera-Montalvo LA
