# Supplementary material for: Rapid evaluation of COVID-19 vaccine effectiveness against VOC/VOIs by genetic mismatch
Source: bioRxiv or medRxiv preprint supplement (doi:10.1101/2021.04.22.21254079), 2021-11-26
Supplement: Supplementary file [file media-2.zip]

We gratefully acknowledge the following Authors from the Originating laboratories responsible for obtaining the specimens, as well as the Submitting laboratories where the genome data were generated and shared via GISAID, on which this research is based.

All Submitters of data may be contacted directly via [www.gisaid.org](http://www.gisaid.org)

Authors are sorted alphabetically.

| Accession ID                                                                                                                                                                                                                                                                                                                                                                                                                                                                                                                                                                                                                                                                                                                                                                                                                                                                                                                                                                                                                                                                                                                                                                                                                                                                                                                   | Originating Laboratory                                                                                                                                                                                         | Submitting Laboratory                                                                        | Authors                                                                                                                                                                                                                                                                                                                                                                                                                                                |
|--------------------------------------------------------------------------------------------------------------------------------------------------------------------------------------------------------------------------------------------------------------------------------------------------------------------------------------------------------------------------------------------------------------------------------------------------------------------------------------------------------------------------------------------------------------------------------------------------------------------------------------------------------------------------------------------------------------------------------------------------------------------------------------------------------------------------------------------------------------------------------------------------------------------------------------------------------------------------------------------------------------------------------------------------------------------------------------------------------------------------------------------------------------------------------------------------------------------------------------------------------------------------------------------------------------------------------|----------------------------------------------------------------------------------------------------------------------------------------------------------------------------------------------------------------|----------------------------------------------------------------------------------------------|--------------------------------------------------------------------------------------------------------------------------------------------------------------------------------------------------------------------------------------------------------------------------------------------------------------------------------------------------------------------------------------------------------------------------------------------------------|
| EPI_ISL_1039008, EPI_ISL_1039009, EPI_ISL_1039010, EPI_ISL_1039011                                                                                                                                                                                                                                                                                                                                                                                                                                                                                                                                                                                                                                                                                                                                                                                                                                                                                                                                                                                                                                                                                                                                                                                                                                                             | WHO National Influenza Centre Russian Federation                                                                                                                                                               | WHO National Influenza Centre Russian Federation                                             | Andrey Komissarov, Artem Fadeev, Anna Ivanova, Kseniya Komissarova, Dmitry Bazhenov, Tamila Musaeva, Maria Timofeeva, Veronika Eder, Maria Pisareva, Daria Danilenko, Ksenia Safina, Elena Nabieva, Georgii Bazykin, Dmitry Lioznov                                                                                                                                                                                                                    |
| EPI_ISL_1039012, EPI_ISL_1039013, EPI_ISL_1039014, EPI_ISL_1039015, EPI_ISL_1039016, EPI_ISL_1039017, EPI_ISL_1039018, EPI_ISL_1039019, EPI_ISL_1039020, EPI_ISL_1039021, EPI_ISL_1039022, EPI_ISL_1039023, EPI_ISL_1039024, EPI_ISL_1039025, EPI_ISL_1039026, EPI_ISL_1039027, EPI_ISL_1039028, EPI_ISL_1039029, EPI_ISL_1039030, EPI_ISL_1039031, EPI_ISL_1039032, EPI_ISL_1039033, EPI_ISL_1039034, EPI_ISL_1039035, EPI_ISL_1039036, EPI_ISL_1039037, EPI_ISL_1039038, EPI_ISL_1039039, EPI_ISL_1039040, EPI_ISL_1039041, EPI_ISL_1039042, EPI_ISL_1039043, EPI_ISL_1039044, EPI_ISL_1039045, EPI_ISL_1039046, EPI_ISL_1039047, EPI_ISL_1039048, EPI_ISL_1039049, EPI_ISL_1039050, EPI_ISL_1039051, EPI_ISL_1039052, EPI_ISL_1039053, EPI_ISL_1039054, EPI_ISL_1039055, EPI_ISL_1039056                                                                                                                                                                                                                                                                                                                                                                                                                                                                                                                                    | WHO National Influenza Centre Russian Federation                                                                                                                                                               | WHO National Influenza Centre Russian Federation                                             | Andrey Komissarov, Artem Fadeev, Anna Ivanova, Kseniya Komissarova, Dmitry Bazhenov, Tamila Musaeva, Maria Timofeeva, Veronika Eder, Maria Pisareva, Daria Danilenko, Ksenia Safina, Elena Nabieva, Georgii Bazykin, Dmitry Lioznov                                                                                                                                                                                                                    |
| see above                                                                                                                                                                                                                                                                                                                                                                                                                                                                                                                                                                                                                                                                                                                                                                                                                                                                                                                                                                                                                                                                                                                                                                                                                                                                                                                      | Kamchatka Regional Children's Infectious Diseases Hospital                                                                                                                                                     | WHO National Influenza Centre Russian Federation                                             | Andrey Komissarov, Artem Fadeev, Anna Ivanova, Kseniya Komissarova, Dmitry Bazhenov, Tamila Musaeva, Maria Timofeeva, Veronika Eder, Maria Pisareva, Daria Danilenko, Ksenia Safina, Elena Nabieva, Georgii Bazykin, Dmitry Lioznov                                                                                                                                                                                                                    |
| EPI_ISL_1039057, EPI_ISL_1039058, EPI_ISL_1039059, EPI_ISL_1039060, EPI_ISL_1039061, EPI_ISL_1039062, EPI_ISL_1039063, EPI_ISL_1039064, EPI_ISL_1039065, EPI_ISL_1039066, EPI_ISL_1039067, EPI_ISL_1039068, EPI_ISL_1039069, EPI_ISL_1039070, EPI_ISL_1039071, EPI_ISL_1039072, EPI_ISL_1039073, EPI_ISL_1039074, EPI_ISL_1039075, EPI_ISL_1039076, EPI_ISL_1039077, EPI_ISL_1039078, EPI_ISL_1039079, EPI_ISL_1039080, EPI_ISL_1039081, EPI_ISL_1039082, EPI_ISL_1039083, EPI_ISL_1039084, EPI_ISL_1039085, EPI_ISL_1039086, EPI_ISL_1039087, EPI_ISL_1039088, EPI_ISL_1039089, EPI_ISL_1039090, EPI_ISL_1039091, EPI_ISL_1039092, EPI_ISL_1039093, EPI_ISL_1039094, EPI_ISL_1039095, EPI_ISL_1039096, EPI_ISL_1039097, EPI_ISL_1039098, EPI_ISL_1039099, EPI_ISL_1039100, EPI_ISL_1039101, EPI_ISL_1039102, EPI_ISL_1039103, EPI_ISL_1039104, EPI_ISL_1039105, EPI_ISL_1039106, EPI_ISL_1039107, EPI_ISL_1039108, EPI_ISL_1039109, EPI_ISL_1039110, EPI_ISL_1039111, EPI_ISL_1039112, EPI_ISL_1039113, EPI_ISL_1039114, EPI_ISL_1039115, EPI_ISL_1039116, EPI_ISL_1039117, EPI_ISL_1039118, EPI_ISL_1039119, EPI_ISL_1039120, EPI_ISL_1039121, EPI_ISL_1039122, EPI_ISL_1039123                                                                                                                                              | WHO National Influenza Centre Russian Federation                                                                                                                                                               | WHO National Influenza Centre Russian Federation                                             | Andrey Komissarov, Artem Fadeev, Lyudmila Berdinskikh, Anna Ivanova, Kseniya Komissarova, Dmitry Bazhenov, Tamila Musaeva, Maria Timofeeva, Veronika Eder, Maria Pisareva, Daria Danilenko, Ksenia Safina, Elena Nabieva, Georgii Bazykin, Dmitry Lioznov                                                                                                                                                                                              |
| see above                                                                                                                                                                                                                                                                                                                                                                                                                                                                                                                                                                                                                                                                                                                                                                                                                                                                                                                                                                                                                                                                                                                                                                                                                                                                                                                      | Center of Hygiene and Epidemiology in Belgorod Region                                                                                                                                                          | WHO National Influenza Centre Russian Federation                                             | Andrey Komissarov, Artem Fadeev, Lyudmila Berdinskikh, Anna Ivanova, Kseniya Komissarova, Dmitry Bazhenov, Tamila Musaeva, Maria Timofeeva, Veronika Eder, Maria Pisareva, Daria Danilenko, Ksenia Safina, Elena Nabieva, Georgii Bazykin, Dmitry Lioznov                                                                                                                                                                                              |
| EPI_ISL_1039124, EPI_ISL_1039125, EPI_ISL_1039126, EPI_ISL_1039127, EPI_ISL_1039128, EPI_ISL_1039129, EPI_ISL_1039130, EPI_ISL_1039131, EPI_ISL_1039132, EPI_ISL_1039133, EPI_ISL_1039134, EPI_ISL_1039135, EPI_ISL_1039136, EPI_ISL_1039137                                                                                                                                                                                                                                                                                                                                                                                                                                                                                                                                                                                                                                                                                                                                                                                                                                                                                                                                                                                                                                                                                   |                                                                                                                                                                                                                |                                                                                              |                                                                                                                                                                                                                                                                                                                                                                                                                                                        |
| see above                                                                                                                                                                                                                                                                                                                                                                                                                                                                                                                                                                                                                                                                                                                                                                                                                                                                                                                                                                                                                                                                                                                                                                                                                                                                                                                      | HELIX LLC                                                                                                                                                                                                      | WHO National Influenza Centre Russian Federation                                             | Andrey Komissarov, Artem Fadeev, Anna Ivanova, Kseniya Komissarova, Dmitry Bazhenov, Tamila Musaeva, Maria Timofeeva, Veronika Eder, Maria Pisareva, Daria Danilenko, Ksenia Safina, Elena Nabieva, Georgii Bazykin, Dmitry Lioznov                                                                                                                                                                                                                    |
| EPI_ISL_1039138, EPI_ISL_1039139, EPI_ISL_1039140, EPI_ISL_1039141, EPI_ISL_1039142, EPI_ISL_1039143, EPI_ISL_1039144, EPI_ISL_1039145, EPI_ISL_1039147, EPI_ISL_1039148, EPI_ISL_1039149, EPI_ISL_1039150, EPI_ISL_1039151, EPI_ISL_1039152, EPI_ISL_1039153, EPI_ISL_1039154, EPI_ISL_1039155                                                                                                                                                                                                                                                                                                                                                                                                                                                                                                                                                                                                                                                                                                                                                                                                                                                                                                                                                                                                                                |                                                                                                                                                                                                                |                                                                                              |                                                                                                                                                                                                                                                                                                                                                                                                                                                        |
| see above                                                                                                                                                                                                                                                                                                                                                                                                                                                                                                                                                                                                                                                                                                                                                                                                                                                                                                                                                                                                                                                                                                                                                                                                                                                                                                                      | Pathogenic Microorganisms Variability Laboratory                                                                                                                                                               | WHO National Influenza Centre Russian Federation                                             | Andrey Komissarov, Artem Fadeev, Anna Ivanova, Kseniya Komissarova, Dmitry Bazhenov, Daria Danilenko, Ksenia Safina, Elena Nabieva, Georgii Bazykin, Nadezhda Kuznetsova, Elena Shidlovskaya, Sergey Alkhovsky, Tatyana Vishnevskaya, Elizaveta Divisenko, Alexey Shchetinin, Maria Nikiforova, Andrey Pochtovyv, Evgeny Usachev, Elena Vokalova, Maxim Rubalsky, Oleg Rubalsky, Artem Tkachuk, Vladimir Gushchik, Alexander Gintsburg, Dmitry Lioznov |
| EPI_ISL_1039156, EPI_ISL_1039157, EPI_ISL_1039158, EPI_ISL_1039159                                                                                                                                                                                                                                                                                                                                                                                                                                                                                                                                                                                                                                                                                                                                                                                                                                                                                                                                                                                                                                                                                                                                                                                                                                                             | WHO National Influenza Centre Russian Federation                                                                                                                                                               | WHO National Influenza Centre Russian Federation                                             | Andrey Komissarov, Artem Fadeev, Anna Ivanova, Kseniya Komissarova, Dmitry Bazhenov, Tamila Musaeva, Maria Timofeeva, Veronika Eder, Maria Pisareva, Daria Danilenko, Ksenia Safina, Elena Nabieva, Georgii Bazykin, Dmitry Lioznov                                                                                                                                                                                                                    |
| EPI_ISL_1082298, EPI_ISL_1082299, EPI_ISL_1082300, EPI_ISL_1082301, EPI_ISL_1082302, EPI_ISL_1082303, EPI_ISL_1082304, EPI_ISL_1082305, EPI_ISL_1082306, EPI_ISL_1082307, EPI_ISL_1082308, EPI_ISL_1082309, EPI_ISL_1082310, EPI_ISL_1082311, EPI_ISL_1082312, EPI_ISL_1082313, EPI_ISL_1082314, EPI_ISL_1082315, EPI_ISL_1082316, EPI_ISL_1082317, EPI_ISL_1082318, EPI_ISL_1082319                                                                                                                                                                                                                                                                                                                                                                                                                                                                                                                                                                                                                                                                                                                                                                                                                                                                                                                                           |                                                                                                                                                                                                                |                                                                                              |                                                                                                                                                                                                                                                                                                                                                                                                                                                        |
| see above                                                                                                                                                                                                                                                                                                                                                                                                                                                                                                                                                                                                                                                                                                                                                                                                                                                                                                                                                                                                                                                                                                                                                                                                                                                                                                                      | Laboratory of Virology of Federal Budget Health Care Institution "Center of Hygiene and Epidemiology in Arkhangelsk region"                                                                                    | Group of Genomics and Postgenomic Technologies of Central Research Institute of Epidemiology | Samoilov AE, Kaptelova VV, Korneenko EV, Valdokhina AV, Bulanenko VP, Saenko SS, Semyina LV, Ponomareva YA, Shishko LA, Cherkashina AS, Golubeva AG, Speranskaya AS, Tivanova EV, Kondrasheva LV, Akimkin VG                                                                                                                                                                                                                                           |
| EPI_ISL_596232                                                                                                                                                                                                                                                                                                                                                                                                                                                                                                                                                                                                                                                                                                                                                                                                                                                                                                                                                                                                                                                                                                                                                                                                                                                                                                                 | WHO National Influenza Centre Russian Federation                                                                                                                                                               | WHO National Influenza Centre Russian Federation                                             | Andrey Komissarov, Artem Fadeev, Anna Ivanova, Mariia Sergeeva, Kseniya Komissarova, Dmitry Bazhenov, Daria Danilenko                                                                                                                                                                                                                                                                                                                                  |
| EPI_ISL_596235, EPI_ISL_596236, EPI_ISL_596237, EPI_ISL_596238, EPI_ISL_596239, EPI_ISL_596240, EPI_ISL_596241, EPI_ISL_596242, EPI_ISL_596243, EPI_ISL_596244, EPI_ISL_596245, EPI_ISL_596246, EPI_ISL_596247, EPI_ISL_596248, EPI_ISL_596249                                                                                                                                                                                                                                                                                                                                                                                                                                                                                                                                                                                                                                                                                                                                                                                                                                                                                                                                                                                                                                                                                 |                                                                                                                                                                                                                |                                                                                              |                                                                                                                                                                                                                                                                                                                                                                                                                                                        |
| see above                                                                                                                                                                                                                                                                                                                                                                                                                                                                                                                                                                                                                                                                                                                                                                                                                                                                                                                                                                                                                                                                                                                                                                                                                                                                                                                      | WHO National Influenza Centre Russian Federation                                                                                                                                                               | WHO National Influenza Centre Russian Federation                                             | Andrey Komissarov, Artem Fadeev, Anna Ivanova, Kseniya Komissarova, Dmitry Bazhenov, Daria Danilenko                                                                                                                                                                                                                                                                                                                                                   |
| EPI_ISL_596268, EPI_ISL_596269, EPI_ISL_596271, EPI_ISL_596272, EPI_ISL_596273, EPI_ISL_596274, EPI_ISL_596277, EPI_ISL_596278, EPI_ISL_596279, EPI_ISL_596280, EPI_ISL_596281, EPI_ISL_596282, EPI_ISL_596283, EPI_ISL_596284, EPI_ISL_596285, EPI_ISL_596286, EPI_ISL_596287, EPI_ISL_596288, EPI_ISL_596289, EPI_ISL_596290, EPI_ISL_596291, EPI_ISL_596292, EPI_ISL_596293, EPI_ISL_596294, EPI_ISL_596295, EPI_ISL_596296, EPI_ISL_596297, EPI_ISL_596298, EPI_ISL_596299, EPI_ISL_596300, EPI_ISL_596301, EPI_ISL_596302, EPI_ISL_596303, EPI_ISL_596304, EPI_ISL_596307, EPI_ISL_596308, EPI_ISL_596309, EPI_ISL_596315                                                                                                                                                                                                                                                                                                                                                                                                                                                                                                                                                                                                                                                                                                 |                                                                                                                                                                                                                |                                                                                              |                                                                                                                                                                                                                                                                                                                                                                                                                                                        |
| see above                                                                                                                                                                                                                                                                                                                                                                                                                                                                                                                                                                                                                                                                                                                                                                                                                                                                                                                                                                                                                                                                                                                                                                                                                                                                                                                      | HELIX LCC                                                                                                                                                                                                      | WHO National Influenza Centre Russian Federation                                             | Andrey Komissarov, Artem Fadeev, Anna Ivanova, Kseniya Komissarova, Dmitry Bazhenov, Daria Danilenko                                                                                                                                                                                                                                                                                                                                                   |
| EPI_ISL_602332, EPI_ISL_602333, EPI_ISL_602334, EPI_ISL_602335, EPI_ISL_602336, EPI_ISL_602337, EPI_ISL_602338, EPI_ISL_602339, EPI_ISL_602340, EPI_ISL_602341, EPI_ISL_602342, EPI_ISL_602343, EPI_ISL_602344, EPI_ISL_602345, EPI_ISL_602346, EPI_ISL_602347, EPI_ISL_602348, EPI_ISL_602349, EPI_ISL_602350, EPI_ISL_602351, EPI_ISL_602352, EPI_ISL_602353, EPI_ISL_602354, EPI_ISL_602355, EPI_ISL_602356, EPI_ISL_602357, EPI_ISL_602358, EPI_ISL_602359, EPI_ISL_602360, EPI_ISL_602361, EPI_ISL_602362, EPI_ISL_602363, EPI_ISL_602364, EPI_ISL_602365, EPI_ISL_602366, EPI_ISL_602367, EPI_ISL_602368, EPI_ISL_602369, EPI_ISL_602370, EPI_ISL_602371, EPI_ISL_602372, EPI_ISL_602373, EPI_ISL_602374, EPI_ISL_602375, EPI_ISL_602376, EPI_ISL_602377, EPI_ISL_602378, EPI_ISL_602379, EPI_ISL_602380, EPI_ISL_602381, EPI_ISL_602382, EPI_ISL_602383, EPI_ISL_602384, EPI_ISL_602385, EPI_ISL_602386, EPI_ISL_602387, EPI_ISL_602388, EPI_ISL_602389, EPI_ISL_602390, EPI_ISL_602391, EPI_ISL_602392, EPI_ISL_602393, EPI_ISL_602394, EPI_ISL_602395, EPI_ISL_602396, EPI_ISL_602397, EPI_ISL_602398, EPI_ISL_602399, EPI_ISL_602400, EPI_ISL_602401, EPI_ISL_602402, EPI_ISL_602403, EPI_ISL_602404, EPI_ISL_602405, EPI_ISL_602406, EPI_ISL_602407, EPI_ISL_602408, EPI_ISL_602409, EPI_ISL_602410, EPI_ISL_602411 |                                                                                                                                                                                                                |                                                                                              |                                                                                                                                                                                                                                                                                                                                                                                                                                                        |
| see above                                                                                                                                                                                                                                                                                                                                                                                                                                                                                                                                                                                                                                                                                                                                                                                                                                                                                                                                                                                                                                                                                                                                                                                                                                                                                                                      | HELIX LLC                                                                                                                                                                                                      | WHO National Influenza Centre Russian Federation                                             | Andrey Komissarov, Artem Fadeev, Kseniya Komissarova, Anna Ivanova, Dmitry Bazhenov, Daria Danilenko                                                                                                                                                                                                                                                                                                                                                   |
| EPI_ISL_602413, EPI_ISL_602414, EPI_ISL_602415, EPI_ISL_602416                                                                                                                                                                                                                                                                                                                                                                                                                                                                                                                                                                                                                                                                                                                                                                                                                                                                                                                                                                                                                                                                                                                                                                                                                                                                 | WHO National Influenza Centre Russian Federation                                                                                                                                                               | WHO National Influenza Centre Russian Federation                                             | Andrey Komissarov, Artem Fadeev, Kseniya Komissarova, Anna Ivanova, Dmitry Bazhenov, Daria Danilenko                                                                                                                                                                                                                                                                                                                                                   |
| EPI_ISL_602417, EPI_ISL_602418, EPI_ISL_602419, EPI_ISL_602420, EPI_ISL_602421, EPI_ISL_602422, EPI_ISL_602423, EPI_ISL_602424, EPI_ISL_602425, EPI_ISL_602426, EPI_ISL_602427, EPI_ISL_602428, EPI_ISL_602429, EPI_ISL_602430, EPI_ISL_602431, EPI_ISL_602432, EPI_ISL_602433, EPI_ISL_602434, EPI_ISL_602435, EPI_ISL_602436, EPI_ISL_602437, EPI_ISL_602438, EPI_ISL_602439, EPI_ISL_602440, EPI_ISL_602441, EPI_ISL_602442, EPI_ISL_602443, EPI_ISL_602444, EPI_ISL_602445, EPI_ISL_602446, EPI_ISL_602447, EPI_ISL_602448, EPI_ISL_602449, EPI_ISL_602450, EPI_ISL_602451, EPI_ISL_602452, EPI_ISL_602453, EPI_ISL_602454, EPI_ISL_602455, EPI_ISL_602456, EPI_ISL_602457, EPI_ISL_602458, EPI_ISL_602459, EPI_ISL_602460, EPI_ISL_602461, EPI_ISL_639948, EPI_ISL_639949, EPI_ISL_639951, EPI_ISL_639952, EPI_ISL_639953, EPI_ISL_639954, EPI_ISL_639955, EPI_ISL_639956, EPI_ISL_639957, EPI_ISL_639958, EPI_ISL_639959, EPI_ISL_639960, EPI_ISL_639961, EPI_ISL_639962, EPI_ISL_639963, EPI_ISL_639964, EPI_ISL_639965, EPI_ISL_639966, EPI_ISL_639967, EPI_ISL_639968, EPI_ISL_639969, EPI_ISL_639970, EPI_ISL_639971, EPI_ISL_639972, EPI_ISL_639973                                                                                                                                                                 |                                                                                                                                                                                                                |                                                                                              |                                                                                                                                                                                                                                                                                                                                                                                                                                                        |
| see above                                                                                                                                                                                                                                                                                                                                                                                                                                                                                                                                                                                                                                                                                                                                                                                                                                                                                                                                                                                                                                                                                                                                                                                                                                                                                                                      | HELIX LLC                                                                                                                                                                                                      | WHO National Influenza Centre Russian Federation                                             | Andrey Komissarov, Artem Fadeev, Kseniya Komissarova, Anna Ivanova, Dmitry Bazhenov, Daria Danilenko                                                                                                                                                                                                                                                                                                                                                   |
| EPI_ISL_717965, EPI_ISL_717966, EPI_ISL_717967, EPI_ISL_717968, EPI_ISL_717969, EPI_ISL_717970, EPI_ISL_717971, EPI_ISL_717972, EPI_ISL_717973, EPI_ISL_717974                                                                                                                                                                                                                                                                                                                                                                                                                                                                                                                                                                                                                                                                                                                                                                                                                                                                                                                                                                                                                                                                                                                                                                 | Molecular diagnostic laboratory of Federal Budget Institution of Science "Central Research Institute of Epidemiology" of The Federal Service on Customers' Rights Protection and Human Well-being Surveillance | Group of Genomics and Postgenomic Technologies of Central Research Institute of Epidemiology | Samoilov AE, Kaptelova VV, Dudorova AV, Korneenko EV, Speranskaya AS, Tivanova EV, Shipulina OY, Akimkin VG                                                                                                                                                                                                                                                                                                                                            |
| EPI_ISL_732659, EPI_ISL_732660, EPI_ISL_732661, EPI_ISL_732662, EPI_ISL_732663, EPI_ISL_732664, EPI_ISL_732665, EPI_ISL_732666, EPI_ISL_732667, EPI_ISL_732668, EPI_ISL_732669, EPI_ISL_732670, EPI_ISL_732671, EPI_ISL_732672, EPI_ISL_732673, EPI_ISL_732674, EPI_ISL_732675, EPI_ISL_732676                                                                                                                                                                                                                                                                                                                                                                                                                                                                                                                                                                                                                                                                                                                                                                                                                                                                                                                                                                                                                                 |                                                                                                                                                                                                                |                                                                                              |                                                                                                                                                                                                                                                                                                                                                                                                                                                        |
| see above                                                                                                                                                                                                                                                                                                                                                                                                                                                                                                                                                                                                                                                                                                                                                                                                                                                                                                                                                                                                                                                                                                                                                                                                                                                                                                                      | Molecular diagnostic laboratory of Federal Budget Institution of Science "Central Research Institute of Epidemiology" of The Federal Service on Customers' Rights Protection and Human Well-being Surveillance | Group of Genomics and Postgenomic Technologies of Central Research Institute of Epidemiology | Samoilov AE, Kaptelova VV, Dudorova AV, Korneenko EV, Saenko SS, Speranskaya AS, Tivanova EV, Shipulina OY, Akimkin VG                                                                                                                                                                                                                                                                                                                                 |
| EPI_ISL_732974, EPI_ISL_732975, EPI_ISL_732976, EPI_ISL_732977, EPI_ISL_732978, EPI_ISL_732979, EPI_ISL_732980, EPI_ISL_732981, EPI_ISL_732982, EPI_ISL_732983, EPI_ISL_732984, EPI_ISL_732985, EPI_ISL_732986, EPI_ISL_732987, EPI_ISL_732988, EPI_ISL_732989                                                                                                                                                                                                                                                                                                                                                                                                                                                                                                                                                                                                                                                                                                                                                                                                                                                                                                                                                                                                                                                                 |                                                                                                                                                                                                                |                                                                                              |                                                                                                                                                                                                                                                                                                                                                                                                                                                        |
| see above                                                                                                                                                                                                                                                                                                                                                                                                                                                                                                                                                                                                                                                                                                                                                                                                                                                                                                                                                                                                                                                                                                                                                                                                                                                                                                                      | WHO National Influenza Centre Russian Federation                                                                                                                                                               | WHO National Influenza Centre Russian Federation                                             | Andrey Komissarov, Artem Fadeev, Anna Ivanova, Kseniya Komissarova, Dmitry Bazhenov, Daria Danilenko, Ksenia Safina, Elena Nabieva, Georgii Bazykin, Dmitry Lioznov                                                                                                                                                                                                                                                                                    |
| EPI_ISL_733023, EPI_ISL_733024, EPI_ISL_733025, EPI_ISL_733026, EPI_ISL_733027, EPI_ISL_733028, EPI_ISL_733029, EPI_ISL_733030, EPI_ISL_733031, EPI_ISL_733032, EPI_ISL_733033, EPI_ISL_733034, EPI_ISL_733035, EPI_ISL_733036, EPI_ISL_733037, EPI_ISL_733038, EPI_ISL_733039, EPI_ISL_733040,                                                                                                                                                                                                                                                                                                                                                                                                                                                                                                                                                                                                                                                                                                                                                                                                                                                                                                                                                                                                                                |                                                                                                                                                                                                                |                                                                                              |                                                                                                                                                                                                                                                                                                                                                                                                                                                        |

|                                                                                                                                                                                                                                                                                                                                                                                                                                                                                                                                                                                                                                                                                                                                                                                                                                                                                                                                                                                                                                                                                                                                                                                                                                                                                                                                                                                                                                                                                                                                                                                                                                                                                                                                                                                                                                |                                                                                                                                                                                                                |                                                                                              |                                                                                                                                                                                                                                                                                                                                                                                                                                                        |
|--------------------------------------------------------------------------------------------------------------------------------------------------------------------------------------------------------------------------------------------------------------------------------------------------------------------------------------------------------------------------------------------------------------------------------------------------------------------------------------------------------------------------------------------------------------------------------------------------------------------------------------------------------------------------------------------------------------------------------------------------------------------------------------------------------------------------------------------------------------------------------------------------------------------------------------------------------------------------------------------------------------------------------------------------------------------------------------------------------------------------------------------------------------------------------------------------------------------------------------------------------------------------------------------------------------------------------------------------------------------------------------------------------------------------------------------------------------------------------------------------------------------------------------------------------------------------------------------------------------------------------------------------------------------------------------------------------------------------------------------------------------------------------------------------------------------------------|----------------------------------------------------------------------------------------------------------------------------------------------------------------------------------------------------------------|----------------------------------------------------------------------------------------------|--------------------------------------------------------------------------------------------------------------------------------------------------------------------------------------------------------------------------------------------------------------------------------------------------------------------------------------------------------------------------------------------------------------------------------------------------------|
| EPI_ISL_733041, EPI_ISL_733042, EPI_ISL_733043, EPI_ISL_733044, EPI_ISL_733045, EPI_ISL_733046, EPI_ISL_733047, EPI_ISL_733048, EPI_ISL_733049, EPI_ISL_733050, EPI_ISL_733051, EPI_ISL_733052, EPI_ISL_733053, EPI_ISL_733054, EPI_ISL_733055, EPI_ISL_733056, EPI_ISL_733057, EPI_ISL_733058, EPI_ISL_733059, EPI_ISL_733060, EPI_ISL_733061, EPI_ISL_733062, EPI_ISL_733063, EPI_ISL_733064, EPI_ISL_733065, EPI_ISL_733066, EPI_ISL_733067, EPI_ISL_733068, EPI_ISL_733069, EPI_ISL_733070, EPI_ISL_733071, EPI_ISL_733072, EPI_ISL_733073, EPI_ISL_733074, EPI_ISL_733075, EPI_ISL_733076, EPI_ISL_733079, EPI_ISL_733080, EPI_ISL_733081, EPI_ISL_733082, EPI_ISL_733083, EPI_ISL_733084, EPI_ISL_733085, EPI_ISL_733086, EPI_ISL_733087, EPI_ISL_733088, EPI_ISL_733089, EPI_ISL_733090, EPI_ISL_733091, EPI_ISL_733092, EPI_ISL_733093, EPI_ISL_733094, EPI_ISL_733095, EPI_ISL_733096, EPI_ISL_733097, EPI_ISL_733098, EPI_ISL_733099, EPI_ISL_733100, EPI_ISL_733101, EPI_ISL_733102, EPI_ISL_733103, EPI_ISL_733104, EPI_ISL_733105, EPI_ISL_733106, EPI_ISL_733107, EPI_ISL_733108, EPI_ISL_733109, EPI_ISL_733110, EPI_ISL_733111, EPI_ISL_733112, EPI_ISL_733113, EPI_ISL_733114, EPI_ISL_733115, EPI_ISL_733116, EPI_ISL_733117, EPI_ISL_733118, EPI_ISL_733119, EPI_ISL_733120, EPI_ISL_733121, EPI_ISL_733122, EPI_ISL_733123, EPI_ISL_733124, EPI_ISL_733125, EPI_ISL_733126, EPI_ISL_733127, EPI_ISL_733128, EPI_ISL_733129, EPI_ISL_733130, EPI_ISL_733131, EPI_ISL_733132, EPI_ISL_733133, EPI_ISL_733134, EPI_ISL_733135, EPI_ISL_733136, EPI_ISL_733137, EPI_ISL_733138, EPI_ISL_733139, EPI_ISL_733140, EPI_ISL_733141, EPI_ISL_733142, EPI_ISL_733143, EPI_ISL_733144, EPI_ISL_733145, EPI_ISL_733146, EPI_ISL_733147, EPI_ISL_733148, EPI_ISL_733149, EPI_ISL_733150, EPI_ISL_733152, EPI_ISL_733153 |                                                                                                                                                                                                                |                                                                                              |                                                                                                                                                                                                                                                                                                                                                                                                                                                        |
| see above                                                                                                                                                                                                                                                                                                                                                                                                                                                                                                                                                                                                                                                                                                                                                                                                                                                                                                                                                                                                                                                                                                                                                                                                                                                                                                                                                                                                                                                                                                                                                                                                                                                                                                                                                                                                                      | HELIX LLC                                                                                                                                                                                                      | WHO National Influenza Centre Russian Federation                                             | Andrey Komissarov, Artem Fadeev, Anna Ivanova, Kseniya Komissarova, Dmitry Bazhenov, Daria Danilenko, Ksenia Safina, Elena Nabieva, Georgii Bazykin, Dmitry Lioznov                                                                                                                                                                                                                                                                                    |
| EPI_ISL_733154, EPI_ISL_733155, EPI_ISL_733183, EPI_ISL_733184                                                                                                                                                                                                                                                                                                                                                                                                                                                                                                                                                                                                                                                                                                                                                                                                                                                                                                                                                                                                                                                                                                                                                                                                                                                                                                                                                                                                                                                                                                                                                                                                                                                                                                                                                                 | WHO National Influenza Centre Russian Federation                                                                                                                                                               | WHO National Influenza Centre Russian Federation                                             | Andrey Komissarov, Artem Fadeev, Anna Ivanova, Kseniya Komissarova, Dmitry Bazhenov, Daria Danilenko, Ksenia Safina, Elena Nabieva, Georgii Bazykin, Dmitry Lioznov                                                                                                                                                                                                                                                                                    |
| EPI_ISL_733185, EPI_ISL_733186, EPI_ISL_733190, EPI_ISL_733191, EPI_ISL_733192, EPI_ISL_733194, EPI_ISL_733203, EPI_ISL_733204, EPI_ISL_733205, EPI_ISL_733206, EPI_ISL_733207, EPI_ISL_733208, EPI_ISL_733214, EPI_ISL_733216, EPI_ISL_733217, EPI_ISL_733218, EPI_ISL_733219, EPI_ISL_733220                                                                                                                                                                                                                                                                                                                                                                                                                                                                                                                                                                                                                                                                                                                                                                                                                                                                                                                                                                                                                                                                                                                                                                                                                                                                                                                                                                                                                                                                                                                                 |                                                                                                                                                                                                                |                                                                                              |                                                                                                                                                                                                                                                                                                                                                                                                                                                        |
| see above                                                                                                                                                                                                                                                                                                                                                                                                                                                                                                                                                                                                                                                                                                                                                                                                                                                                                                                                                                                                                                                                                                                                                                                                                                                                                                                                                                                                                                                                                                                                                                                                                                                                                                                                                                                                                      | Pathogenic Microorganisms Variability Laboratory                                                                                                                                                               | WHO National Influenza Centre Russian Federation                                             | Andrey Komissarov, Artem Fadeev, Anna Ivanova, Kseniya Komissarova, Dmitry Bazhenov, Daria Danilenko, Ksenia Safina, Elena Nabieva, Georgii Bazykin, Nadezhda Kuznetsova, Elena Shidlovskaya, Sergey Alkhovsky, Tatyana Vishnevskaya, Elizaveta Divisenko, Alexey Shchetinin, Maria Nikiforova, Andrey Pochtovyy, Evgeny Usachev, Elena Vokalova, Maxim Rubalsky, Oleg Rubalsky, Artem Tkachuk, Vladimir Gushchin, Alexander Gintsburg, Dmitry Lioznov |
| EPI_ISL_733228, EPI_ISL_733229, EPI_ISL_733230, EPI_ISL_733231, EPI_ISL_733232, EPI_ISL_733233, EPI_ISL_733234, EPI_ISL_733235, EPI_ISL_733236, EPI_ISL_733237, EPI_ISL_733238, EPI_ISL_733239, EPI_ISL_733240                                                                                                                                                                                                                                                                                                                                                                                                                                                                                                                                                                                                                                                                                                                                                                                                                                                                                                                                                                                                                                                                                                                                                                                                                                                                                                                                                                                                                                                                                                                                                                                                                 |                                                                                                                                                                                                                |                                                                                              |                                                                                                                                                                                                                                                                                                                                                                                                                                                        |
| see above                                                                                                                                                                                                                                                                                                                                                                                                                                                                                                                                                                                                                                                                                                                                                                                                                                                                                                                                                                                                                                                                                                                                                                                                                                                                                                                                                                                                                                                                                                                                                                                                                                                                                                                                                                                                                      | UMMC-Health                                                                                                                                                                                                    | WHO National Influenza Centre Russian Federation                                             | Andrey Komissarov, Artem Fadeev, Anna Ivanova, Kseniya Komissarova, Dmitry Bazhenov, Tatiana Platonova, Daria Danilenko, Ksenia Safina, Elena Nabieva, Georgii Bazykin, Dmitry Lioznov                                                                                                                                                                                                                                                                 |
| EPI_ISL_733241, EPI_ISL_733242, EPI_ISL_733243, EPI_ISL_733244, EPI_ISL_733245, EPI_ISL_733246, EPI_ISL_733247, EPI_ISL_733248, EPI_ISL_733249, EPI_ISL_733250, EPI_ISL_733251, EPI_ISL_733252, EPI_ISL_733253, EPI_ISL_733254, EPI_ISL_733255, EPI_ISL_733256, EPI_ISL_733257, EPI_ISL_733258, EPI_ISL_733259, EPI_ISL_733260, EPI_ISL_733261, EPI_ISL_733262, EPI_ISL_733263, EPI_ISL_733264, EPI_ISL_733265, EPI_ISL_733266, EPI_ISL_733267, EPI_ISL_733268, EPI_ISL_733269, EPI_ISL_733270, EPI_ISL_733271, EPI_ISL_733272, EPI_ISL_733273, EPI_ISL_733274, EPI_ISL_733275, EPI_ISL_733276, EPI_ISL_733277, EPI_ISL_733278, EPI_ISL_733279, EPI_ISL_733280, EPI_ISL_733281, EPI_ISL_733282, EPI_ISL_733283, EPI_ISL_733284, EPI_ISL_733285, EPI_ISL_733286, EPI_ISL_733287, EPI_ISL_733288, EPI_ISL_733289, EPI_ISL_733290, EPI_ISL_733291, EPI_ISL_733292, EPI_ISL_733293, EPI_ISL_733294, EPI_ISL_733295, EPI_ISL_733296, EPI_ISL_733297, EPI_ISL_733298, EPI_ISL_733299, EPI_ISL_733300                                                                                                                                                                                                                                                                                                                                                                                                                                                                                                                                                                                                                                                                                                                                                                                                                                 |                                                                                                                                                                                                                |                                                                                              |                                                                                                                                                                                                                                                                                                                                                                                                                                                        |
| see above                                                                                                                                                                                                                                                                                                                                                                                                                                                                                                                                                                                                                                                                                                                                                                                                                                                                                                                                                                                                                                                                                                                                                                                                                                                                                                                                                                                                                                                                                                                                                                                                                                                                                                                                                                                                                      | WHO National Influenza Centre Russian Federation                                                                                                                                                               | WHO National Influenza Centre Russian Federation                                             | Andrey Komissarov, Artem Fadeev, Anna Ivanova, Kseniya Komissarova, Dmitry Bazhenov, Daria Danilenko, Ksenia Safina, Elena Nabieva, Georgii Bazykin, Dmitry Lioznov                                                                                                                                                                                                                                                                                    |
| EPI_ISL_733301, EPI_ISL_733302, EPI_ISL_733303, EPI_ISL_733304, EPI_ISL_733305, EPI_ISL_733306, EPI_ISL_733307, EPI_ISL_733308, EPI_ISL_733309, EPI_ISL_733310, EPI_ISL_733311, EPI_ISL_733312, EPI_ISL_733313, EPI_ISL_733314, EPI_ISL_733315, EPI_ISL_733316, EPI_ISL_733317, EPI_ISL_733318, EPI_ISL_733319, EPI_ISL_733320, EPI_ISL_733321, EPI_ISL_733322, EPI_ISL_733323, EPI_ISL_733324, EPI_ISL_733325, EPI_ISL_733326, EPI_ISL_733327, EPI_ISL_733328, EPI_ISL_733329, EPI_ISL_733330, EPI_ISL_733331, EPI_ISL_733332, EPI_ISL_733333, EPI_ISL_733334, EPI_ISL_733335, EPI_ISL_733336, EPI_ISL_733337, EPI_ISL_733338, EPI_ISL_733339, EPI_ISL_733340, EPI_ISL_733341, EPI_ISL_733342, EPI_ISL_733343, EPI_ISL_733344, EPI_ISL_733345, EPI_ISL_733346, EPI_ISL_733347, EPI_ISL_733348, EPI_ISL_733349, EPI_ISL_733350, EPI_ISL_733351, EPI_ISL_733352, EPI_ISL_733353, EPI_ISL_733354, EPI_ISL_733355, EPI_ISL_733356, EPI_ISL_733357, EPI_ISL_733358, EPI_ISL_733359, EPI_ISL_733360, EPI_ISL_733361, EPI_ISL_733362, EPI_ISL_733363, EPI_ISL_733364, EPI_ISL_733365, EPI_ISL_733366, EPI_ISL_733367, EPI_ISL_733368, EPI_ISL_733369, EPI_ISL_733370, EPI_ISL_733371, EPI_ISL_733372, EPI_ISL_733373, EPI_ISL_733374, EPI_ISL_733375, EPI_ISL_733376, EPI_ISL_733377, EPI_ISL_733378, EPI_ISL_733379, EPI_ISL_733380, EPI_ISL_733381, EPI_ISL_733382, EPI_ISL_733383, EPI_ISL_733384, EPI_ISL_733385, EPI_ISL_733386, EPI_ISL_733387, EPI_ISL_733388, EPI_ISL_733389, EPI_ISL_733390, EPI_ISL_733391                                                                                                                                                                                                                                                                                                                 |                                                                                                                                                                                                                |                                                                                              |                                                                                                                                                                                                                                                                                                                                                                                                                                                        |
| see above                                                                                                                                                                                                                                                                                                                                                                                                                                                                                                                                                                                                                                                                                                                                                                                                                                                                                                                                                                                                                                                                                                                                                                                                                                                                                                                                                                                                                                                                                                                                                                                                                                                                                                                                                                                                                      | HELIX LLC                                                                                                                                                                                                      | WHO National Influenza Centre Russian Federation                                             | Andrey Komissarov, Artem Fadeev, Anna Ivanova, Kseniya Komissarova, Dmitry Bazhenov, Daria Danilenko, Ksenia Safina, Elena Nabieva, Georgii Bazykin, Dmitry Lioznov                                                                                                                                                                                                                                                                                    |
| EPI_ISL_733394, EPI_ISL_733395                                                                                                                                                                                                                                                                                                                                                                                                                                                                                                                                                                                                                                                                                                                                                                                                                                                                                                                                                                                                                                                                                                                                                                                                                                                                                                                                                                                                                                                                                                                                                                                                                                                                                                                                                                                                 | WHO National Influenza Centre Russian Federation                                                                                                                                                               | WHO National Influenza Centre Russian Federation                                             | Andrey Komissarov, Artem Fadeev, Anna Ivanova, Kseniya Komissarova, Dmitry Bazhenov, Daria Danilenko, Ksenia Safina, Elena Nabieva, Georgii Bazykin, Dmitry Lioznov                                                                                                                                                                                                                                                                                    |
| EPI_ISL_733396, EPI_ISL_733397, EPI_ISL_733398, EPI_ISL_733399, EPI_ISL_733400, EPI_ISL_733401                                                                                                                                                                                                                                                                                                                                                                                                                                                                                                                                                                                                                                                                                                                                                                                                                                                                                                                                                                                                                                                                                                                                                                                                                                                                                                                                                                                                                                                                                                                                                                                                                                                                                                                                 | HELIX LLC                                                                                                                                                                                                      | WHO National Influenza Centre Russian Federation                                             | Andrey Komissarov, Artem Fadeev, Anna Ivanova, Kseniya Komissarova, Dmitry Bazhenov, Daria Danilenko, Ksenia Safina, Elena Nabieva, Georgii Bazykin, Dmitry Lioznov                                                                                                                                                                                                                                                                                    |
| EPI_ISL_733403                                                                                                                                                                                                                                                                                                                                                                                                                                                                                                                                                                                                                                                                                                                                                                                                                                                                                                                                                                                                                                                                                                                                                                                                                                                                                                                                                                                                                                                                                                                                                                                                                                                                                                                                                                                                                 | WHO National Influenza Centre Russian Federation                                                                                                                                                               | WHO National Influenza Centre Russian Federation                                             | Andrey Komissarov, Artem Fadeev, Anna Ivanova, Kseniya Komissarova, Dmitry Bazhenov, Daria Danilenko, Ksenia Safina, Elena Nabieva, Georgii Bazykin, Dmitry Lioznov                                                                                                                                                                                                                                                                                    |
| EPI_ISL_733405, EPI_ISL_733406, EPI_ISL_733407, EPI_ISL_733408, EPI_ISL_733409, EPI_ISL_733410, EPI_ISL_733411, EPI_ISL_733412, EPI_ISL_733413, EPI_ISL_733414, EPI_ISL_733415, EPI_ISL_733416                                                                                                                                                                                                                                                                                                                                                                                                                                                                                                                                                                                                                                                                                                                                                                                                                                                                                                                                                                                                                                                                                                                                                                                                                                                                                                                                                                                                                                                                                                                                                                                                                                 |                                                                                                                                                                                                                |                                                                                              |                                                                                                                                                                                                                                                                                                                                                                                                                                                        |
| see above                                                                                                                                                                                                                                                                                                                                                                                                                                                                                                                                                                                                                                                                                                                                                                                                                                                                                                                                                                                                                                                                                                                                                                                                                                                                                                                                                                                                                                                                                                                                                                                                                                                                                                                                                                                                                      | UMMC-Health                                                                                                                                                                                                    | WHO National Influenza Centre Russian Federation                                             | Andrey Komissarov, Artem Fadeev, Anna Ivanova, Kseniya Komissarova, Dmitry Bazhenov, Tatiana Platonova, Daria Danilenko, Ksenia Safina, Elena Nabieva, Georgii Bazykin, Dmitry Lioznov                                                                                                                                                                                                                                                                 |
| EPI_ISL_733417, EPI_ISL_733418, EPI_ISL_733419, EPI_ISL_733420, EPI_ISL_733421, EPI_ISL_733422, EPI_ISL_733423, EPI_ISL_733424, EPI_ISL_733425, EPI_ISL_733426, EPI_ISL_733427, EPI_ISL_733428, EPI_ISL_733429, EPI_ISL_733430, EPI_ISL_733431, EPI_ISL_733432, EPI_ISL_733433, EPI_ISL_733434, EPI_ISL_733435, EPI_ISL_733436, EPI_ISL_733437, EPI_ISL_733438, EPI_ISL_733439, EPI_ISL_733440, EPI_ISL_733441, EPI_ISL_733442, EPI_ISL_733443, EPI_ISL_733444, EPI_ISL_733445, EPI_ISL_733446, EPI_ISL_733447, EPI_ISL_733448, EPI_ISL_733449, EPI_ISL_733450, EPI_ISL_733451, EPI_ISL_733452, EPI_ISL_733453, EPI_ISL_733454, EPI_ISL_733455, EPI_ISL_733456, EPI_ISL_733457, EPI_ISL_733458                                                                                                                                                                                                                                                                                                                                                                                                                                                                                                                                                                                                                                                                                                                                                                                                                                                                                                                                                                                                                                                                                                                                 |                                                                                                                                                                                                                |                                                                                              |                                                                                                                                                                                                                                                                                                                                                                                                                                                        |
| see above                                                                                                                                                                                                                                                                                                                                                                                                                                                                                                                                                                                                                                                                                                                                                                                                                                                                                                                                                                                                                                                                                                                                                                                                                                                                                                                                                                                                                                                                                                                                                                                                                                                                                                                                                                                                                      | HELIX LLC                                                                                                                                                                                                      | WHO National Influenza Centre Russian Federation                                             | Andrey Komissarov, Artem Fadeev, Anna Ivanova, Kseniya Komissarova, Dmitry Bazhenov, Daria Danilenko, Ksenia Safina, Elena Nabieva, Georgii Bazykin, Dmitry Lioznov                                                                                                                                                                                                                                                                                    |
| EPI_ISL_733459, EPI_ISL_733460, EPI_ISL_733461, EPI_ISL_733462, EPI_ISL_733463, EPI_ISL_733464, EPI_ISL_733465, EPI_ISL_733466, EPI_ISL_733467, EPI_ISL_733468, EPI_ISL_733469, EPI_ISL_733470, EPI_ISL_733471, EPI_ISL_733472, EPI_ISL_733473, EPI_ISL_733474, EPI_ISL_733475, EPI_ISL_733476, EPI_ISL_733477                                                                                                                                                                                                                                                                                                                                                                                                                                                                                                                                                                                                                                                                                                                                                                                                                                                                                                                                                                                                                                                                                                                                                                                                                                                                                                                                                                                                                                                                                                                 |                                                                                                                                                                                                                |                                                                                              |                                                                                                                                                                                                                                                                                                                                                                                                                                                        |
| see above                                                                                                                                                                                                                                                                                                                                                                                                                                                                                                                                                                                                                                                                                                                                                                                                                                                                                                                                                                                                                                                                                                                                                                                                                                                                                                                                                                                                                                                                                                                                                                                                                                                                                                                                                                                                                      | WHO National Influenza Centre Russian Federation                                                                                                                                                               | WHO National Influenza Centre Russian Federation                                             | Andrey Komissarov, Artem Fadeev, Anna Ivanova, Kseniya Komissarova, Dmitry Bazhenov, Daria Danilenko, Ksenia Safina, Elena Nabieva, Georgii Bazykin, Dmitry Lioznov                                                                                                                                                                                                                                                                                    |
| EPI_ISL_733478, EPI_ISL_733479, EPI_ISL_733480, EPI_ISL_733481                                                                                                                                                                                                                                                                                                                                                                                                                                                                                                                                                                                                                                                                                                                                                                                                                                                                                                                                                                                                                                                                                                                                                                                                                                                                                                                                                                                                                                                                                                                                                                                                                                                                                                                                                                 | SOGAZ PROFMEDICINA LLC                                                                                                                                                                                         | WHO National Influenza Centre Russian Federation                                             | Andrey Komissarov, Artem Fadeev, Anna Ivanova, Kseniya Komissarova, Dmitry Bazhenov, Daria Danilenko, Ksenia Safina, Elena Nabieva, Georgii Bazykin, Dmitry Lioznov                                                                                                                                                                                                                                                                                    |
| EPI_ISL_733483, EPI_ISL_733484, EPI_ISL_733485, EPI_ISL_733486, EPI_ISL_733487, EPI_ISL_733488, EPI_ISL_733489, EPI_ISL_733490, EPI_ISL_733491, EPI_ISL_733492, EPI_ISL_733493                                                                                                                                                                                                                                                                                                                                                                                                                                                                                                                                                                                                                                                                                                                                                                                                                                                                                                                                                                                                                                                                                                                                                                                                                                                                                                                                                                                                                                                                                                                                                                                                                                                 |                                                                                                                                                                                                                |                                                                                              |                                                                                                                                                                                                                                                                                                                                                                                                                                                        |
| see above                                                                                                                                                                                                                                                                                                                                                                                                                                                                                                                                                                                                                                                                                                                                                                                                                                                                                                                                                                                                                                                                                                                                                                                                                                                                                                                                                                                                                                                                                                                                                                                                                                                                                                                                                                                                                      | Omsk Research Institute of Natural Focal Infections                                                                                                                                                            | WHO National Influenza Centre Russian Federation                                             | Andrey Komissarov, Artem Fadeev, Anna Ivanova, Kseniya Komissarova, Dmitry Bazhenov, Daria Danilenko, Ekaterina Gradoboeva, Elena Poleshchuk, Aleksei Vasilenko, Valery Yakimenko, Ksenia Safina, Elena Nabieva, Georgii Bazykin, Dmitry Lioznov                                                                                                                                                                                                       |
| EPI_ISL_733494, EPI_ISL_733495                                                                                                                                                                                                                                                                                                                                                                                                                                                                                                                                                                                                                                                                                                                                                                                                                                                                                                                                                                                                                                                                                                                                                                                                                                                                                                                                                                                                                                                                                                                                                                                                                                                                                                                                                                                                 | WHO National Influenza Centre Russian Federation                                                                                                                                                               | WHO National Influenza Centre Russian Federation                                             | Andrey Komissarov, Artem Fadeev, Anna Ivanova, Kseniya Komissarova, Dmitry Bazhenov, Daria Danilenko, Ksenia Safina, Elena Nabieva, Georgii Bazykin, Dmitry Lioznov                                                                                                                                                                                                                                                                                    |
| EPI_ISL_745224, EPI_ISL_745225, EPI_ISL_745226, EPI_ISL_745227, EPI_ISL_745228, EPI_ISL_745229, EPI_ISL_745230, EPI_ISL_745231, EPI_ISL_745232, EPI_ISL_745233, EPI_ISL_745234, EPI_ISL_745235, EPI_ISL_745236, EPI_ISL_745237, EPI_ISL_745238, EPI_ISL_745239, EPI_ISL_745240, EPI_ISL_745241, EPI_ISL_745242, EPI_ISL_745243, EPI_ISL_745244, EPI_ISL_745245, EPI_ISL_745246, EPI_ISL_745247, EPI_ISL_745248, EPI_ISL_745249, EPI_ISL_745250, EPI_ISL_745251, EPI_ISL_745252, EPI_ISL_745253, EPI_ISL_745254, EPI_ISL_745255, EPI_ISL_745256, EPI_ISL_745257, EPI_ISL_745258                                                                                                                                                                                                                                                                                                                                                                                                                                                                                                                                                                                                                                                                                                                                                                                                                                                                                                                                                                                                                                                                                                                                                                                                                                                 |                                                                                                                                                                                                                |                                                                                              |                                                                                                                                                                                                                                                                                                                                                                                                                                                        |
| see above                                                                                                                                                                                                                                                                                                                                                                                                                                                                                                                                                                                                                                                                                                                                                                                                                                                                                                                                                                                                                                                                                                                                                                                                                                                                                                                                                                                                                                                                                                                                                                                                                                                                                                                                                                                                                      | Molecular diagnostic laboratory of Federal Budget Institution of Science "Central Research Institute of Epidemiology" of The Federal Service on Customers' Rights Protection and Human Well-being Surveillance | Group of Genomics and Postgenomic Technologies of Central Research Institute of Epidemiology | Samoilov AE, Kapteleva VV, Korneenko EV, Dudorova AV, Saenko SS, Speranskaya AS, Tivanova EV, Shipulina OY, Akimkin VG                                                                                                                                                                                                                                                                                                                                 |
| EPI_ISL_754196, EPI_ISL_754197, EPI_ISL_754198, EPI_ISL_754199, EPI_ISL_754200, EPI_ISL_754201, EPI_ISL_754202, EPI_ISL_754203, EPI_ISL_754204, EPI_ISL_754205, EPI_ISL_754206, EPI_ISL_754207, EPI_ISL_754208, EPI_ISL_754209, EPI_ISL_754210, EPI_ISL_754211, EPI_ISL_754212, EPI_ISL_754213, EPI_ISL_754214                                                                                                                                                                                                                                                                                                                                                                                                                                                                                                                                                                                                                                                                                                                                                                                                                                                                                                                                                                                                                                                                                                                                                                                                                                                                                                                                                                                                                                                                                                                 |                                                                                                                                                                                                                |                                                                                              |                                                                                                                                                                                                                                                                                                                                                                                                                                                        |
| see above                                                                                                                                                                                                                                                                                                                                                                                                                                                                                                                                                                                                                                                                                                                                                                                                                                                                                                                                                                                                                                                                                                                                                                                                                                                                                                                                                                                                                                                                                                                                                                                                                                                                                                                                                                                                                      | Molecular diagnostic laboratory of Federal Budget Institution of Science "Central Research Institute of Epidemiology" of The Federal Service on Customers' Rights Protection and Human Well-being Surveillance | Group of Genomics and Postgenomic Technologies of Central Research Institute of Epidemiology | Samoilov AE, Kapteleva VV, Korneenko EV, Saenko SS, Dudorova AV, Speranskaya AS, Tivanova EV, Shipulina OY, Akimkin VG                                                                                                                                                                                                                                                                                                                                 |
| EPI_ISL_770633, EPI_ISL_770634, EPI_ISL_770635, EPI_ISL_770636,                                                                                                                                                                                                                                                                                                                                                                                                                                                                                                                                                                                                                                                                                                                                                                                                                                                                                                                                                                                                                                                                                                                                                                                                                                                                                                                                                                                                                                                                                                                                                                                                                                                                                                                                                                | WHO National Influenza Centre Russian Federation                                                                                                                                                               | WHO National Influenza Centre Russian Federation                                             | Andrey Komissarov, Artem Fadeev, Anna Ivanova, Kseniya Komissarova, Dmitry Bazhenov, Daria Danilenko, Ksenia Safina, Elena Nabieva, Georgii Bazykin, Dmitry Lioznov                                                                                                                                                                                                                                                                                    |

[illegible]

|                                                                                                                                                                                                                                                                                                                                                                                                                                                                                                                |                                                                                                                                   |                                                                                                 |                                                                                                                                                                                  |  |
|----------------------------------------------------------------------------------------------------------------------------------------------------------------------------------------------------------------------------------------------------------------------------------------------------------------------------------------------------------------------------------------------------------------------------------------------------------------------------------------------------------------|-----------------------------------------------------------------------------------------------------------------------------------|-------------------------------------------------------------------------------------------------|----------------------------------------------------------------------------------------------------------------------------------------------------------------------------------|--|
| EPI_ISL_984628, EPI_ISL_984629, EPI_ISL_984630, EPI_ISL_984631, EPI_ISL_984632, EPI_ISL_984633, EPI_ISL_984634, EPI_ISL_984635, EPI_ISL_984636, EPI_ISL_984637, EPI_ISL_984638, EPI_ISL_984639, EPI_ISL_984640, EPI_ISL_984641, EPI_ISL_984642, EPI_ISL_984643, EPI_ISL_984644, EPI_ISL_984645, EPI_ISL_984646, EPI_ISL_984647, EPI_ISL_984648, EPI_ISL_984649, EPI_ISL_984650, EPI_ISL_984651, EPI_ISL_984652, EPI_ISL_984653, EPI_ISL_984654, EPI_ISL_984655, EPI_ISL_984656, EPI_ISL_984657, EPI_ISL_984658 |                                                                                                                                   |                                                                                                 |                                                                                                                                                                                  |  |
| see above                                                                                                                                                                                                                                                                                                                                                                                                                                                                                                      | Laboratory of Virology of Federal Budget Health Care<br>Institution Center of Hygiene and Epidemiology in Arkhangelsk<br>region   | Group of Genomics and Postgenomic Technologies of Central<br>Research Institute of Epidemiology | Samoilov AE, Kaptelova VV, Korneenko EV, Valdokhina AV, Bulanenko VP, Saenko SS, Semyina LV,Ponomareva YA,Shishko LA, Speranskaya AS,<br>Tivanova EV, Kondrasheva LV, Akimkin VG |  |
| EPI_ISL_984682                                                                                                                                                                                                                                                                                                                                                                                                                                                                                                 | Laboratory of Virology of Federal Budget Health Care<br>Institution "Center of Hygiene and Epidemiology in<br>Arkhangelsk region" | Group of Genomics and Postgenomic Technologies of Central<br>Research Institute of Epidemiology | Samoilov AE, Kaptelova VV, Korneenko EV, Valdokhina AV, Bulanenko VP, Saenko SS, Semyina LV,Ponomareva YA,Shishko LA, Speranskaya AS,<br>Tivanova EV, Kondrasheva LV, Akimkin VG |  |
