# Supplementary material for: Rapid evaluation of COVID-19 vaccine effectiveness against VOC/VOIs by genetic mismatch
Source: bioRxiv or medRxiv preprint supplement (doi:10.1101/2021.04.22.21254079), 2021-11-26
Supplement: Supplementary file [file media-2.zip]

We gratefully acknowledge the following Authors from the Originating laboratories responsible for obtaining the specimens, as well as the Submitting laboratories where the genome data were generated and shared via GISAID, on which this research is based.

All Submitters of data may be contacted directly via [www.gisaid.org](http://www.gisaid.org)

Authors are sorted alphabetically.

| Accession ID                                                                                                                                                                                                                                                                                                                                                                                                                                                                                                                                                                                                                                                                                                                                                                                                                                                                                                                                                                                                                                                                                                                                                                                                                                                                                                                                                                                                                                                                                                                                                                                                                                                                                                                                                                                                                                                                                                                                                                                                                                                                                                                                                                                                                                                                                                                                                                                                                                                                                                                                                                                                                                                                                                                                                                                                                                                                                                                                                                                                                                                                                                                                                                                                                                                                                                                                                                                                                                                                                                                                                                                                                                                                                                                                                                                                                                                                                                                                                                                                                                                                                                                                                                                                                                                                                                                                                                                                                                                                                                                                                                                                                                                                                                                                                                                                                | Originating Laboratory                                                                                                                                                                                                                                                                                                                                                                                                                                 | Submitting Laboratory                                                                                                                                                                                                                                                                                                                          | Authors                                                                                                                                                                                                                                                                                                                                                                                                                                                                                                                                                                                                                                                                                                                                                                                                                                                                                                                                                                                                                                                                                                                                                                                                                                                                                                                                                                                                                                                                                                                                                     |
|-----------------------------------------------------------------------------------------------------------------------------------------------------------------------------------------------------------------------------------------------------------------------------------------------------------------------------------------------------------------------------------------------------------------------------------------------------------------------------------------------------------------------------------------------------------------------------------------------------------------------------------------------------------------------------------------------------------------------------------------------------------------------------------------------------------------------------------------------------------------------------------------------------------------------------------------------------------------------------------------------------------------------------------------------------------------------------------------------------------------------------------------------------------------------------------------------------------------------------------------------------------------------------------------------------------------------------------------------------------------------------------------------------------------------------------------------------------------------------------------------------------------------------------------------------------------------------------------------------------------------------------------------------------------------------------------------------------------------------------------------------------------------------------------------------------------------------------------------------------------------------------------------------------------------------------------------------------------------------------------------------------------------------------------------------------------------------------------------------------------------------------------------------------------------------------------------------------------------------------------------------------------------------------------------------------------------------------------------------------------------------------------------------------------------------------------------------------------------------------------------------------------------------------------------------------------------------------------------------------------------------------------------------------------------------------------------------------------------------------------------------------------------------------------------------------------------------------------------------------------------------------------------------------------------------------------------------------------------------------------------------------------------------------------------------------------------------------------------------------------------------------------------------------------------------------------------------------------------------------------------------------------------------------------------------------------------------------------------------------------------------------------------------------------------------------------------------------------------------------------------------------------------------------------------------------------------------------------------------------------------------------------------------------------------------------------------------------------------------------------------------------------------------------------------------------------------------------------------------------------------------------------------------------------------------------------------------------------------------------------------------------------------------------------------------------------------------------------------------------------------------------------------------------------------------------------------------------------------------------------------------------------------------------------------------------------------------------------------------------------------------------------------------------------------------------------------------------------------------------------------------------------------------------------------------------------------------------------------------------------------------------------------------------------------------------------------------------------------------------------------------------------------------------------------------------------------------|--------------------------------------------------------------------------------------------------------------------------------------------------------------------------------------------------------------------------------------------------------------------------------------------------------------------------------------------------------------------------------------------------------------------------------------------------------|------------------------------------------------------------------------------------------------------------------------------------------------------------------------------------------------------------------------------------------------------------------------------------------------------------------------------------------------|-------------------------------------------------------------------------------------------------------------------------------------------------------------------------------------------------------------------------------------------------------------------------------------------------------------------------------------------------------------------------------------------------------------------------------------------------------------------------------------------------------------------------------------------------------------------------------------------------------------------------------------------------------------------------------------------------------------------------------------------------------------------------------------------------------------------------------------------------------------------------------------------------------------------------------------------------------------------------------------------------------------------------------------------------------------------------------------------------------------------------------------------------------------------------------------------------------------------------------------------------------------------------------------------------------------------------------------------------------------------------------------------------------------------------------------------------------------------------------------------------------------------------------------------------------------|
| EPI_ISL_1000244, EPI_ISL_1000245, EPI_ISL_1000246, EPI_ISL_1000258, EPI_ISL_1000270, EPI_ISL_1000272, EPI_ISL_1000417, EPI_ISL_1000418, EPI_ISL_1000420<br>EPI_ISL_1000665                                                                                                                                                                                                                                                                                                                                                                                                                                                                                                                                                                                                                                                                                                                                                                                                                                                                                                                                                                                                                                                                                                                                                                                                                                                                                                                                                                                                                                                                                                                                                                                                                                                                                                                                                                                                                                                                                                                                                                                                                                                                                                                                                                                                                                                                                                                                                                                                                                                                                                                                                                                                                                                                                                                                                                                                                                                                                                                                                                                                                                                                                                                                                                                                                                                                                                                                                                                                                                                                                                                                                                                                                                                                                                                                                                                                                                                                                                                                                                                                                                                                                                                                                                                                                                                                                                                                                                                                                                                                                                                                                                                                                                                  | Centre for Enzyme Innovation, University of Portsmouth / Translational Research Laboratory, Portsmouth Hospitals NHS Trust<br><br>Virology Department, Sheffield Teaching Hospitals NHS Foundation Trust/Department of Infection, Immunity and Cardiovascular Disease, The Medical School, University of Sheffield                                                                                                                                     | COVID-19 Genomics UK (COG-UK) Consortium<br><br>COVID-19 Genomics UK (COG-UK) Consortium                                                                                                                                                                                                                                                       | Angela Beckett,Salman Goudarzi,Christopher Fearn,Kate Cook,Katie Loveson,Sharon Glaysher,Scott Elliott,Samuel Robson<br><br>Thushan de Silva, Matthew Parker, Nikki Smith, Adri Anygal, Rebecca Brown, Luke Green, Rachel Tucker, Paul Parsons, Danielle Groves, Katie Johnson, Laura Carrilero, Alex Keeley, Dave Partridge, Matthew Wyles, Benjamin Lindsey, Mehmet Yavuz, Mohammad Raza, Cariad Evans                                                                                                                                                                                                                                                                                                                                                                                                                                                                                                                                                                                                                                                                                                                                                                                                                                                                                                                                                                                                                                                                                                                                                    |
| EPI_ISL_1000881, EPI_ISL_1000883, EPI_ISL_1000884, EPI_ISL_1000885, EPI_ISL_1000886, EPI_ISL_1000887, EPI_ISL_1000889, EPI_ISL_1000890, EPI_ISL_1000892, EPI_ISL_1000893, EPI_ISL_1000898, EPI_ISL_1000899, EPI_ISL_1000900, EPI_ISL_1000901, EPI_ISL_1000903, EPI_ISL_1000904, EPI_ISL_1000905, EPI_ISL_1000907, EPI_ISL_1000908, EPI_ISL_1000912<br>see above                                                                                                                                                                                                                                                                                                                                                                                                                                                                                                                                                                                                                                                                                                                                                                                                                                                                                                                                                                                                                                                                                                                                                                                                                                                                                                                                                                                                                                                                                                                                                                                                                                                                                                                                                                                                                                                                                                                                                                                                                                                                                                                                                                                                                                                                                                                                                                                                                                                                                                                                                                                                                                                                                                                                                                                                                                                                                                                                                                                                                                                                                                                                                                                                                                                                                                                                                                                                                                                                                                                                                                                                                                                                                                                                                                                                                                                                                                                                                                                                                                                                                                                                                                                                                                                                                                                                                                                                                                                             | Bioinformatics and Biostatistics Lab, Advanced Sequencing Facility<br><br>Lighthouse Lab in Cambridge<br><br>Lighthouse Lab in Cambridge<br><br>Lighthouse Lab in Milton Keynes<br><br>University of Birmingham                                                                                                                                                                                                                                        | COVID-19 Genomics UK (COG-UK) Consortium<br><br>Wellcome Sanger Institute for the COVID-19 Genomics UK (COG-UK) Consortium<br><br>Wellcome Sanger Institute for the COVID-19 Genomics UK (COG-UK) Consortium<br><br>Wellcome Sanger Institute for the COVID-19 Genomics UK (COG-UK) Consortium<br><br>COVID-19 Genomics UK (COG-UK) Consortium | Aengus Stewart,Jerome Nicod,Chelsea Sawyer,Laura Cubitt,Harshil Patel,Margaret Crawford<br><br>Rob Howes, The Lighthouse Lab in Cambridge and Alex Alderton, Roberto Amato, Sonia Goncalves, Ewan Harrison, David K. Jackson, Ian Johnston, Dominic Kwiatkowski, Cordelia Langford, John Sillitoe on behalf of the Wellcome Sanger Institute COVID-19 Surveillance Team<br><br>Rob Howes, The Lighthouse Lab in Cambridge and Alex Alderton, Roberto Amato, Jeffrey Barrett, Sonia Goncalves, Ewan Harrison, David K. Jackson, Ian Johnston, Dominic Kwiatkowski, Cordelia Langford, John Sillitoe on behalf of the Wellcome Sanger Institute COVID-19 Surveillance Team<br><br>The Lighthouse Lab in Milton Keynes and Alex Alderton, Roberto Amato, Jeffrey Barrett, Sonia Goncalves, Ewan Harrison, David K. Jackson, Ian Johnston, Dominic Kwiatkowski, Cordelia Langford, John Sillitoe on behalf of the Wellcome Sanger Institute COVID-19 Surveillance Team<br><br>Institute of Microbiology, University of Birmingham: Claire McMurray, Joanne Stockton, Samuel Nicholls, Radoslaw Poplawski, Will Rowe, Josh Quick, Nicholas Loman. University of Birmingham Testing Laboratory: Celina M Whalley, Andrew Bosworth, Charlotte Poxon, Kasun Wanigasooriya, Oliver Pickles, Mike Kidd, Alex Richter, Andrew D Beggs PHE Heartlands Lab: Husam Osman, Andrew Bosworth. Queen Elizabeth Hospital: Anna Casey<br><br>McHugh M, Dewar R, Cotton S, Rooke S, O'Toole Á, Scher E, Hill V, McCrone JT, Colquhoun R, Yu X, Jackson B, Rambaut A, Templeton K |
| EPI_ISL_1047858<br><br>EPI_ISL_1048056, EPI_ISL_1048096<br>EPI_ISL_1050235, EPI_ISL_1050238                                                                                                                                                                                                                                                                                                                                                                                                                                                                                                                                                                                                                                                                                                                                                                                                                                                                                                                                                                                                                                                                                                                                                                                                                                                                                                                                                                                                                                                                                                                                                                                                                                                                                                                                                                                                                                                                                                                                                                                                                                                                                                                                                                                                                                                                                                                                                                                                                                                                                                                                                                                                                                                                                                                                                                                                                                                                                                                                                                                                                                                                                                                                                                                                                                                                                                                                                                                                                                                                                                                                                                                                                                                                                                                                                                                                                                                                                                                                                                                                                                                                                                                                                                                                                                                                                                                                                                                                                                                                                                                                                                                                                                                                                                                                 | Virology Department, Royal Infirmary of Edinburgh, NHS Lothian / School of Biological Sciences, University of Edinburgh<br><br>Barts Health NHS Trust<br><br>West of Scotland Specialist Virology Centre, NHSGGC / MRC-University of Glasgow Centre for Virus Research                                                                                                                                                                                 | COVID-19 Genomics UK (COG-UK) Consortium<br><br>COVID-19 Genomics UK (COG-UK) Consortium<br><br>COVID-19 Genomics UK (COG-UK) Consortium                                                                                                                                                                                                       | <br><br>CUTINO-MOQUEL, Maria-Teresa; HARRINGTON, David; OWOYEMI, Dola; KULASEGARAN-SHYLINI, Raghavendran; BROAD, Claire; KELE, Beatrix<br><br>Ana da Silva Filipe, Natasha Johnson, Kathy Smollett, Daniel Mair, Stephen Carmichael, Alice Broos, Lily Tong, Jenna Nichols, Kyriaki Nomikou; Sarah McDonald; Richard Orton, Joseph Hughes, Sreenu Vattipally, David L Robertson; Alasdair MacLean, Rory Gunson; Sharif Shaaban, Matthew Holden; Rachel Blacow, Guy Mollett, Kathy Li, James Shepherd, Antonia Ho, Emma Thomson                                                                                                                                                                                                                                                                                                                                                                                                                                                                                                                                                                                                                                                                                                                                                                                                                                                                                                                                                                                                                              |
| EPI_ISL_1050438, EPI_ISL_1050445, EPI_ISL_1050446, EPI_ISL_1050447, EPI_ISL_1050448, EPI_ISL_1050449, EPI_ISL_1050450, EPI_ISL_1050451, EPI_ISL_1050452, EPI_ISL_1050453, EPI_ISL_1050454, EPI_ISL_1050455, EPI_ISL_1050456, EPI_ISL_1050457, EPI_ISL_1050460, EPI_ISL_1050461, EPI_ISL_1050463, EPI_ISL_1050467, EPI_ISL_1050468, EPI_ISL_1050469, EPI_ISL_1050470, EPI_ISL_1050471, EPI_ISL_1050472, EPI_ISL_1050473, EPI_ISL_1050474, EPI_ISL_1050475, EPI_ISL_1050476, EPI_ISL_1050477, EPI_ISL_1050478, EPI_ISL_1050479, EPI_ISL_1050480, EPI_ISL_1050481, EPI_ISL_1050482, EPI_ISL_1050483, EPI_ISL_1050484, EPI_ISL_1050485, EPI_ISL_1050486, EPI_ISL_1050487, EPI_ISL_1050488, EPI_ISL_1050489, EPI_ISL_1050490, EPI_ISL_1050491, EPI_ISL_1050492, EPI_ISL_1050493, EPI_ISL_1050494, EPI_ISL_1050495, EPI_ISL_1050496, EPI_ISL_1050497, EPI_ISL_1050499, EPI_ISL_1050500, EPI_ISL_1050501, EPI_ISL_1050503, EPI_ISL_1050504, EPI_ISL_1050505, EPI_ISL_1050506, EPI_ISL_1050507, EPI_ISL_1050509, EPI_ISL_1050510, EPI_ISL_1050511, EPI_ISL_1050512, EPI_ISL_1050513, EPI_ISL_1050514, EPI_ISL_1050515, EPI_ISL_1050516, EPI_ISL_1050517, EPI_ISL_1050518, EPI_ISL_1050519, EPI_ISL_1050520, EPI_ISL_1050521, EPI_ISL_1050522, EPI_ISL_1050523, EPI_ISL_1050524, EPI_ISL_1050525<br>see above                                                                                                                                                                                                                                                                                                                                                                                                                                                                                                                                                                                                                                                                                                                                                                                                                                                                                                                                                                                                                                                                                                                                                                                                                                                                                                                                                                                                                                                                                                                                                                                                                                                                                                                                                                                                                                                                                                                                                                                                                                                                                                                                                                                                                                                                                                                                                                                                                                                                                                                                                                                                                                                                                                                                                                                                                                                                                                                                                                                                                                                                                                                                                                                                                                                                                                                                                                                                                                                                                                                        | University College London, Great Ormond Street Hospital for Children NHS Foundation Trust, Imperial College Healthcare NHS Trust<br><br><br><br>University College London, Great Ormond Street Hospital for Children NHS Foundation Trust, Imperial College Healthcare NHS Trust                                                                                                                                                                       | COVID-19 Genomics UK (COG-UK) Consortium<br><br><br><br>COVID-19 Genomics UK (COG-UK) Consortium                                                                                                                                                                                                                                               | Sergi Castellano, Rachel Williams, Mark Kristiansen, Paola Resende Silva, Sunando Roy, Tony Brooks, Helena Tutill, Paola Niola, Patricia Dyal, Charlotte Williams, Leysa Forrest, Yasmin Panchbhaya, Jacqueline Findlay, Samuel Weeks, Julianne Brown, Kathryn Harris, Paul Randell, James Price, Alison Holmes, Judith Breuer                                                                                                                                                                                                                                                                                                                                                                                                                                                                                                                                                                                                                                                                                                                                                                                                                                                                                                                                                                                                                                                                                                                                                                                                                              |
| EPI_ISL_1051103, EPI_ISL_1051125, EPI_ISL_1051126, EPI_ISL_1051127, EPI_ISL_1051128, EPI_ISL_1051129, EPI_ISL_1051130, EPI_ISL_1051131, EPI_ISL_1051132, EPI_ISL_1051133, EPI_ISL_1051134, EPI_ISL_1051135, EPI_ISL_1051136, EPI_ISL_1051137, EPI_ISL_1051138, EPI_ISL_1051139, EPI_ISL_1051140, EPI_ISL_1051141, EPI_ISL_1051142, EPI_ISL_1051143, EPI_ISL_1051144, EPI_ISL_1051145, EPI_ISL_1051146, EPI_ISL_1051147, EPI_ISL_1051148, EPI_ISL_1051149, EPI_ISL_1051150, EPI_ISL_1051151, EPI_ISL_1051152, EPI_ISL_1051153, EPI_ISL_1051154, EPI_ISL_1051156, EPI_ISL_1051157, EPI_ISL_1051158, EPI_ISL_1051159, EPI_ISL_1051161, EPI_ISL_1051163, EPI_ISL_1051164, EPI_ISL_1051165, EPI_ISL_1051166, EPI_ISL_1051167, EPI_ISL_1051168, EPI_ISL_1051169, EPI_ISL_1051170, EPI_ISL_1051171, EPI_ISL_1051172, EPI_ISL_1051174, EPI_ISL_1051175, EPI_ISL_1051177, EPI_ISL_1051178, EPI_ISL_1051179, EPI_ISL_1051180, EPI_ISL_1051181, EPI_ISL_1051182, EPI_ISL_1051183, EPI_ISL_1051184, EPI_ISL_1051185, EPI_ISL_1051186, EPI_ISL_1051188, EPI_ISL_1051189, EPI_ISL_1051190, EPI_ISL_1051191, EPI_ISL_1051192, EPI_ISL_1051193, EPI_ISL_1051194, EPI_ISL_1051195, EPI_ISL_1051196, EPI_ISL_1051197, EPI_ISL_1051198, EPI_ISL_1051199, EPI_ISL_1051200, EPI_ISL_1051201, EPI_ISL_1051202, EPI_ISL_1051203, EPI_ISL_1051204, EPI_ISL_1051205, EPI_ISL_1051206, EPI_ISL_1051207, EPI_ISL_1051208, EPI_ISL_1051209, EPI_ISL_1051210, EPI_ISL_1051211, EPI_ISL_1051212, EPI_ISL_1051213, EPI_ISL_1051214, EPI_ISL_1051215, EPI_ISL_1051216, EPI_ISL_1051217, EPI_ISL_1051218, EPI_ISL_1051219, EPI_ISL_1051220, EPI_ISL_1051221, EPI_ISL_1051222, EPI_ISL_1051223, EPI_ISL_1051224, EPI_ISL_1051225, EPI_ISL_1051226, EPI_ISL_1051227, EPI_ISL_1051228, EPI_ISL_1051229, EPI_ISL_1051230, EPI_ISL_1051231, EPI_ISL_1051232, EPI_ISL_1051233, EPI_ISL_1051234, EPI_ISL_1051235, EPI_ISL_1051236, EPI_ISL_1051237, EPI_ISL_1051238, EPI_ISL_1051239, EPI_ISL_1051240, EPI_ISL_1051241, EPI_ISL_1051242, EPI_ISL_1051243, EPI_ISL_1051244, EPI_ISL_1051245, EPI_ISL_1051246, EPI_ISL_1051247, EPI_ISL_1051248, EPI_ISL_1051249, EPI_ISL_1051250, EPI_ISL_1051251, EPI_ISL_1051252, EPI_ISL_1051253, EPI_ISL_1051254, EPI_ISL_1051255, EPI_ISL_1051256, EPI_ISL_1051257, EPI_ISL_1051258, EPI_ISL_1051259, EPI_ISL_1051260, EPI_ISL_1051261, EPI_ISL_1051262, EPI_ISL_1051263, EPI_ISL_1051264, EPI_ISL_1051265, EPI_ISL_1051266, EPI_ISL_1051267, EPI_ISL_1051268, EPI_ISL_1051269, EPI_ISL_1051270, EPI_ISL_1051271, EPI_ISL_1051272, EPI_ISL_1051273, EPI_ISL_1051274, EPI_ISL_1051275, EPI_ISL_1051276, EPI_ISL_1051277, EPI_ISL_1051278, EPI_ISL_1051279, EPI_ISL_1051280, EPI_ISL_1051281, EPI_ISL_1051282, EPI_ISL_1051283, EPI_ISL_1051284, EPI_ISL_1051285, EPI_ISL_1051286, EPI_ISL_1051287, EPI_ISL_1051288, EPI_ISL_1051289, EPI_ISL_1051290, EPI_ISL_1051291, EPI_ISL_1051292, EPI_ISL_1051293, EPI_ISL_1051294, EPI_ISL_1051295, EPI_ISL_1051296, EPI_ISL_1051297, EPI_ISL_1051298, EPI_ISL_1051299, EPI_ISL_1051300, EPI_ISL_1051301, EPI_ISL_1051302, EPI_ISL_1051303, EPI_ISL_1051304, EPI_ISL_1051305, EPI_ISL_1051306, EPI_ISL_1051307, EPI_ISL_1051308, EPI_ISL_1051309, EPI_ISL_1051310, EPI_ISL_1051311, EPI_ISL_1051312, EPI_ISL_1051313, EPI_ISL_1051314, EPI_ISL_1051315, EPI_ISL_1051316, EPI_ISL_1051317, EPI_ISL_1051318, EPI_ISL_1051319, EPI_ISL_1051320, EPI_ISL_1051321, EPI_ISL_1051322, EPI_ISL_1051323, EPI_ISL_1051324, EPI_ISL_1051325, EPI_ISL_1051326, EPI_ISL_1051327, EPI_ISL_1051328, EPI_ISL_1051329, EPI_ISL_1051330, EPI_ISL_1051331, EPI_ISL_1051332, EPI_ISL_1051333, EPI_ISL_1051334, EPI_ISL_1051335, EPI_ISL_1051336, EPI_ISL_1051337, EPI_ISL_1051338, EPI_ISL_1051339, EPI_ISL_1051340, EPI_ISL_1051341, EPI_ISL_1051342, EPI_ISL_1051343, EPI_ISL_1051344, EPI_ISL_1051345, EPI_ISL_1051346, EPI_ISL_1051347, EPI_ISL_1051348, EPI_ISL_1051349, EPI_ISL_1051350, EPI_ISL_1051351, EPI_ISL_1051352, EPI_ISL_1051353, EPI_ISL_1051354, EPI_ISL_1051355, EPI_ISL_1051356, EPI_ISL_1051357, EPI_ISL_1051358, EPI_ISL_1051359, EPI_ISL_1051360, EPI_ISL_1051361, EPI_ISL_1051362, EPI_ISL_1051363, EPI_ISL_1051364, EPI_ISL_1051365, EPI_ISL_1051366, EPI_ISL_1051367, EPI_ISL_1051368, EPI_ISL_1051369, EPI_ISL_1051370, EPI_ISL_1051371, EPI_ISL_1051372, EPI_ISL_1051373, EPI_ISL_1051374, EPI_ISL_1051375, EPI_ISL_1051376, EPI_ISL_1051377, EPI_ISL_1051378, EPI_ISL_1051379, EPI_ISL_1051380, EPI_ISL_1051381, EPI_ISL_1051382, EPI_ISL_1051383, EPI_ISL_1051384, EPI_ISL_1051385, EPI_ISL_1051386, EPI_ISL_1051387, EPI_ISL_1051388, EPI_ISL_1051389, EPI_ISL_1051390, EPI_ISL_1051391, EPI_ISL_1051392, EPI_ISL_1051393, EPI_ISL_1051394, EPI_ISL_1051395, EPI_ISL_1051396, EPI_ISL_1051397, EPI_ISL_1051398, EPI_ISL_1051399, EPI_ISL_1051400, EPI_ISL_1051401<br>see above | Northumbria University / South Tees Hospitals NHS Foundation Trust / North Cumbria Integrated Care NHS Foundation Trust / North Tees and Hartlepool NHS Foundation Trust / Newcastle Hospitals NHS Foundation Trust<br><br><br><br>Northumbria University / South Tees Hospitals NHS Foundation Trust / North Cumbria Integrated Care NHS Foundation Trust / North Tees and Hartlepool NHS Foundation Trust / Newcastle Hospitals NHS Foundation Trust | COVID-19 Genomics UK (COG-UK) Consortium<br><br><br><br>COVID-19 Genomics UK (COG-UK) Consortium                                                                                                                                                                                                                                               | Darren L Smith,Andrew Nelson,Matthew Bashton,Greg R Young,Joshua Loh,John Allan,Mohammad A Tariq,Giles S Holt,Gary Black,Wen C Yew,Lynn Dover,Paul Baker,Steve Liggett,Sarah Essex,Jane Greenaway,Debra Padgett,Clive Graham,Garren Scott,Edward Barton,Emma Swindells,Brendan Payne,Jennifer Collins,Yusri Taha,Gary Eltringham                                                                                                                                                                                                                                                                                                                                                                                                                                                                                                                                                                                                                                                                                                                                                                                                                                                                                                                                                                                                                                                                                                                                                                                                                            |
| EPI_ISL_1051427, EPI_ISL_1051430, EPI_ISL_1051447, EPI_ISL_1051449, EPI_ISL_1051450, EPI_ISL_1051454, EPI_ISL_1051469, EPI_ISL_1051474, EPI_ISL_1051478, EPI_ISL_1051493, EPI_ISL_1051495, EPI_ISL_1051500, EPI_ISL_1051515<br>see above                                                                                                                                                                                                                                                                                                                                                                                                                                                                                                                                                                                                                                                                                                                                                                                                                                                                                                                                                                                                                                                                                                                                                                                                                                                                                                                                                                                                                                                                                                                                                                                                                                                                                                                                                                                                                                                                                                                                                                                                                                                                                                                                                                                                                                                                                                                                                                                                                                                                                                                                                                                                                                                                                                                                                                                                                                                                                                                                                                                                                                                                                                                                                                                                                                                                                                                                                                                                                                                                                                                                                                                                                                                                                                                                                                                                                                                                                                                                                                                                                                                                                                                                                                                                                                                                                                                                                                                                                                                                                                                                                                                    | Quadram Institute Bioscience                                                                                                                                                                                                                                                                                                                                                                                                                           | COVID-19 Genomics UK (COG-UK) Consortium                                                                                                                                                                                                                                                                                                       | Dave J. Baker, Gemma L. Kay, Alp Aydin, Thanh Le-Viet, Steven Rudder, Ana P. Tedim, Anastasia Kolyva, Maria Diaz, Leonardo de Oliveira Martins, Nabil-Fareed Alikhan, Lizzie Meadows, Rachael Stanley, Ngozi Elumogo, Muhammed Yasir, Nicholas M. Thomson, Alexander J Trotter, Rachel Gilroy, Samuel Bloomfield, Claire Stuart, Andrew Bell, Reenesh Prakash, Samir Dervisevic, Alison E. Mather, John Wain, Mark Webber, Andrew J. Page, Justin O'Grady                                                                                                                                                                                                                                                                                                                                                                                                                                                                                                                                                                                                                                                                                                                                                                                                                                                                                                                                                                                                                                                                                                   |
| EPI_ISL_1051788, EPI_ISL_1051789, EPI_ISL_1051790, EPI_ISL_1051791, EPI_ISL_1051792, EPI_ISL_1051794, EPI_ISL_1051797, EPI_ISL_1051803, EPI_ISL_1051808, EPI_ISL_1051810, EPI_ISL_1051811, EPI_ISL_1051812, EPI_ISL_1051814, EPI_ISL_1051827, EPI_ISL_1051828, EPI_ISL_1051844, EPI_ISL_1051874<br>see above                                                                                                                                                                                                                                                                                                                                                                                                                                                                                                                                                                                                                                                                                                                                                                                                                                                                                                                                                                                                                                                                                                                                                                                                                                                                                                                                                                                                                                                                                                                                                                                                                                                                                                                                                                                                                                                                                                                                                                                                                                                                                                                                                                                                                                                                                                                                                                                                                                                                                                                                                                                                                                                                                                                                                                                                                                                                                                                                                                                                                                                                                                                                                                                                                                                                                                                                                                                                                                                                                                                                                                                                                                                                                                                                                                                                                                                                                                                                                                                                                                                                                                                                                                                                                                                                                                                                                                                                                                                                                                                | Oxford Viromics, NDM, University of Oxford: Oxford University Hospitals; Basingstoke and North Hampshire Hospital                                                                                                                                                                                                                                                                                                                                      | COVID-19 Genomics UK (COG-UK) Consortium                                                                                                                                                                                                                                                                                                       | Tanya Golubchik, David Bonsall, George Macintyre, Amy Trebes, Mariateresa de Cesare, Catrin Moore, Alex Mobbs, Anita Justice, Robert Shaw, Monique Andersson, Timothy Peto, Emma Wise, Nathan Moore, Jessica Lynch, Nick Cortes, Matilde Mori, Stephen Kidd, David Buck, John Todd, Christophe Fraser                                                                                                                                                                                                                                                                                                                                                                                                                                                                                                                                                                                                                                                                                                                                                                                                                                                                                                                                                                                                                                                                                                                                                                                                                                                       |
| EPI_ISL_1054779                                                                                                                                                                                                                                                                                                                                                                                                                                                                                                                                                                                                                                                                                                                                                                                                                                                                                                                                                                                                                                                                                                                                                                                                                                                                                                                                                                                                                                                                                                                                                                                                                                                                                                                                                                                                                                                                                                                                                                                                                                                                                                                                                                                                                                                                                                                                                                                                                                                                                                                                                                                                                                                                                                                                                                                                                                                                                                                                                                                                                                                                                                                                                                                                                                                                                                                                                                                                                                                                                                                                                                                                                                                                                                                                                                                                                                                                                                                                                                                                                                                                                                                                                                                                                                                                                                                                                                                                                                                                                                                                                                                                                                                                                                                                                                                                             | Bioinformatics and Biostatistics Lab, Advanced Sequencing Facility                                                                                                                                                                                                                                                                                                                                                                                     | COVID-19 Genomics UK (COG-UK) Consortium                                                                                                                                                                                                                                                                                                       | Aengus Stewart,Jerome Nicod,Chelsea Sawyer,Laura Cubitt,Harshil Patel,Margaret Crawford                                                                                                                                                                                                                                                                                                                                                                                                                                                                                                                                                                                                                                                                                                                                                                                                                                                                                                                                                                                                                                                                                                                                                                                                                                                                                                                                                                                                                                                                     |
| EPI_ISL_1104197, EPI_ISL_1104220, EPI_ISL_1104221, EPI_ISL_1104231, EPI_ISL_1104235, EPI_ISL_1104236, EPI_ISL_1104241, EPI_ISL_1104242, EPI_ISL_1104243<br>EPI_ISL_1104305                                                                                                                                                                                                                                                                                                                                                                                                                                                                                                                                                                                                                                                                                                                                                                                                                                                                                                                                                                                                                                                                                                                                                                                                                                                                                                                                                                                                                                                                                                                                                                                                                                                                                                                                                                                                                                                                                                                                                                                                                                                                                                                                                                                                                                                                                                                                                                                                                                                                                                                                                                                                                                                                                                                                                                                                                                                                                                                                                                                                                                                                                                                                                                                                                                                                                                                                                                                                                                                                                                                                                                                                                                                                                                                                                                                                                                                                                                                                                                                                                                                                                                                                                                                                                                                                                                                                                                                                                                                                                                                                                                                                                                                  | Virology Department, Royal Infirmary of Edinburgh, NHS Lothian / School of Biological Sciences, University of Edinburgh<br><br>University Hospitals Of Leicester NHS Trust and DeepSeq                                                                                                                                                                                                                                                                 | COVID-19 Genomics UK (COG-UK) Consortium<br><br>COVID-19 Genomics UK (COG-UK) Consortium                                                                                                                                                                                                                                                       | McHugh M, Dewar R, Cotton S, Rooke S, O'Toole Á, Scher E, Hill V, McCrone JT, Colquhoun R, Yu X, Jackson B, Rambaut A, Templeton K<br><br>Christopher Holmes, Paul Bird, Thomas Helmer, Karlie Fallon, Julian Tang, Jonathan Ball, Patrick McClure, Joeseph Chappell, Nadine Holmes, Matthew                                                                                                                                                                                                                                                                                                                                                                                                                                                                                                                                                                                                                                                                                                                                                                                                                                                                                                                                                                                                                                                                                                                                                                                                                                                                |

|                                                                                                                                                                                                                                                                                                                                                                                                                                                                                                                                                                                                                                                                                                                                                                                                                                                                                                                                                                                                                                                                                                                                                                                                                                                                                                                                                                                                                                                                                                                                                                                                                                                                                                                                                                                                                                                                                                                                                                                                                                                                                                                                                                                                                                                                                                                                                                                                                                                                                                                |            |                                                                                                                                                                                                                     |                                                                                      |                                                                                                                                                                                                                                                                                                                                                                                                                                                                                                                                                                                                                                                                                            |
|----------------------------------------------------------------------------------------------------------------------------------------------------------------------------------------------------------------------------------------------------------------------------------------------------------------------------------------------------------------------------------------------------------------------------------------------------------------------------------------------------------------------------------------------------------------------------------------------------------------------------------------------------------------------------------------------------------------------------------------------------------------------------------------------------------------------------------------------------------------------------------------------------------------------------------------------------------------------------------------------------------------------------------------------------------------------------------------------------------------------------------------------------------------------------------------------------------------------------------------------------------------------------------------------------------------------------------------------------------------------------------------------------------------------------------------------------------------------------------------------------------------------------------------------------------------------------------------------------------------------------------------------------------------------------------------------------------------------------------------------------------------------------------------------------------------------------------------------------------------------------------------------------------------------------------------------------------------------------------------------------------------------------------------------------------------------------------------------------------------------------------------------------------------------------------------------------------------------------------------------------------------------------------------------------------------------------------------------------------------------------------------------------------------------------------------------------------------------------------------------------------------|------------|---------------------------------------------------------------------------------------------------------------------------------------------------------------------------------------------------------------------|--------------------------------------------------------------------------------------|--------------------------------------------------------------------------------------------------------------------------------------------------------------------------------------------------------------------------------------------------------------------------------------------------------------------------------------------------------------------------------------------------------------------------------------------------------------------------------------------------------------------------------------------------------------------------------------------------------------------------------------------------------------------------------------------|
|                                                                                                                                                                                                                                                                                                                                                                                                                                                                                                                                                                                                                                                                                                                                                                                                                                                                                                                                                                                                                                                                                                                                                                                                                                                                                                                                                                                                                                                                                                                                                                                                                                                                                                                                                                                                                                                                                                                                                                                                                                                                                                                                                                                                                                                                                                                                                                                                                                                                                                                | Nottingham |                                                                                                                                                                                                                     | Carlisle, Christopher Moore, Fei Sang, Johnny Debebe, Victoria Wright, Matthew Loose |                                                                                                                                                                                                                                                                                                                                                                                                                                                                                                                                                                                                                                                                                            |
| EPI_ISL_1104333, EPI_ISL_1104334, EPI_ISL_1104335, EPI_ISL_1104336, EPI_ISL_1104346, EPI_ISL_1104347, EPI_ISL_1104348, EPI_ISL_1104359, EPI_ISL_1104360, EPI_ISL_1104361, EPI_ISL_1104362, EPI_ISL_1104380, EPI_ISL_1104381, EPI_ISL_1104382, EPI_ISL_1104383, EPI_ISL_1104384                                                                                                                                                                                                                                                                                                                                                                                                                                                                                                                                                                                                                                                                                                                                                                                                                                                                                                                                                                                                                                                                                                                                                                                                                                                                                                                                                                                                                                                                                                                                                                                                                                                                                                                                                                                                                                                                                                                                                                                                                                                                                                                                                                                                                                 | see above  | Liverpool Clinical Laboratories                                                                                                                                                                                     | COVID-19 Genomics UK (COG-UK) Consortium                                             | Sam Haldenby, Anita Lucetti, Steve Paterson, Julian Hiscox, Alistair Darby, M Almsaud, A Alrezaihi, Muhannad Alruwaili, Stuart D Armstrong, Jones Benjamin, Eleanor G Bentley, Anu Chawla, Jordan J Clark, Angela Cowell, Richard Eccles, Isabel Garcia-Dorival, Matthew Gemmell, Alessandro Gerada, PKF Gilmore, Richard Gregory, Ximeng Han, Catherine Hartley, Margaret Hughes, Miren Iturriza-Gomara, James Johnson, L Luu, Jenifer Manson, Charlotte Nelson, Elaine O'Toole, Cassie Olateju, Rebekah Penrice-Randal , Lucille Rainbow, N P Randle, Trevor Ian Robinson, Parul Sharma, Ghada T Shawli, James P Stewart, Neil Swainston, Ecaterina Varnos, Joanne Watts, Mark Whitehead |
| EPI_ISL_1105149, EPI_ISL_1105184, EPI_ISL_1105265, EPI_ISL_1105284, EPI_ISL_1105297, EPI_ISL_1105303                                                                                                                                                                                                                                                                                                                                                                                                                                                                                                                                                                                                                                                                                                                                                                                                                                                                                                                                                                                                                                                                                                                                                                                                                                                                                                                                                                                                                                                                                                                                                                                                                                                                                                                                                                                                                                                                                                                                                                                                                                                                                                                                                                                                                                                                                                                                                                                                           |            | University College London Hospital                                                                                                                                                                                  | COVID-19 Genomics UK (COG-UK) Consortium                                             | Judith Heaney, Matthew Byott, Catherine Houlihan, Dan Frampton, Stuart Kirk, Moira Spyer and Eleni Nastouli                                                                                                                                                                                                                                                                                                                                                                                                                                                                                                                                                                                |
| EPI_ISL_1105667, EPI_ISL_1105668, EPI_ISL_1105669, EPI_ISL_1105670, EPI_ISL_1105671, EPI_ISL_1105672, EPI_ISL_1105673, EPI_ISL_1105674, EPI_ISL_1105675, EPI_ISL_1105676, EPI_ISL_1105677, EPI_ISL_1105678, EPI_ISL_1105679, EPI_ISL_1105680, EPI_ISL_1105681, EPI_ISL_1105682, EPI_ISL_1105683, EPI_ISL_1105684, EPI_ISL_1105685, EPI_ISL_1105686, EPI_ISL_1105687, EPI_ISL_1105688, EPI_ISL_1105689, EPI_ISL_1105690, EPI_ISL_1105691, EPI_ISL_1105692, EPI_ISL_1105693, EPI_ISL_1105694, EPI_ISL_1105695, EPI_ISL_1105696, EPI_ISL_1105697, EPI_ISL_1105698, EPI_ISL_1105699, EPI_ISL_1105701, EPI_ISL_1105702, EPI_ISL_1105703, EPI_ISL_1105704, EPI_ISL_1105705                                                                                                                                                                                                                                                                                                                                                                                                                                                                                                                                                                                                                                                                                                                                                                                                                                                                                                                                                                                                                                                                                                                                                                                                                                                                                                                                                                                                                                                                                                                                                                                                                                                                                                                                                                                                                                           | see above  | Northumbria University / South Tees Hospitals NHS Foundation Trust / North Cumbria Integrated Care NHS Foundation Trust / North Tees and Hartlepool NHS Foundation Trust / Newcastle Hospitals NHS Foundation Trust | COVID-19 Genomics UK (COG-UK) Consortium                                             | Darren L Smith, Andrew Nelson, Matthew Bashton, Greg R Young, Joshua Loh, John Allan, Mohammad A Tariq, Giles S Holt, Gary Black, Wen C Yew, Lynn Dover, Paul Baker, Steve Liggett, Sarah Essex, Jane Greenaway, Debra Padgett, Clive Graham, Garren Scott, Edward Barton, Emma Swindells, Brendan Payne, Jennifer Collins, Yusrli Taha, Gary Eltringham                                                                                                                                                                                                                                                                                                                                   |
| EPI_ISL_1107587, EPI_ISL_1107631, EPI_ISL_1107750                                                                                                                                                                                                                                                                                                                                                                                                                                                                                                                                                                                                                                                                                                                                                                                                                                                                                                                                                                                                                                                                                                                                                                                                                                                                                                                                                                                                                                                                                                                                                                                                                                                                                                                                                                                                                                                                                                                                                                                                                                                                                                                                                                                                                                                                                                                                                                                                                                                              |            | Centre for Enzyme Innovation, University of Portsmouth / Translational Research Laboratory, Portsmouth Hospitals NHS Trust                                                                                          | COVID-19 Genomics UK (COG-UK) Consortium                                             | Angela Beckett, Salman Goudarzi, Christopher Fearn, Kate Cook, Katie Loveson, Sharon Glaysher, Scott Elliott, Samuel Robson                                                                                                                                                                                                                                                                                                                                                                                                                                                                                                                                                                |
| EPI_ISL_811123, EPI_ISL_811124, EPI_ISL_811125, EPI_ISL_811126, EPI_ISL_811150, EPI_ISL_825491, EPI_ISL_825550, EPI_ISL_825551, EPI_ISL_825573, EPI_ISL_825574, EPI_ISL_825616, EPI_ISL_826282                                                                                                                                                                                                                                                                                                                                                                                                                                                                                                                                                                                                                                                                                                                                                                                                                                                                                                                                                                                                                                                                                                                                                                                                                                                                                                                                                                                                                                                                                                                                                                                                                                                                                                                                                                                                                                                                                                                                                                                                                                                                                                                                                                                                                                                                                                                 | see above  | Respiratory Virus Unit, National Infection Service, Public Health England                                                                                                                                           | COVID-19 Genomics UK (COG-UK) Consortium                                             | PHE Covid Sequencing Team                                                                                                                                                                                                                                                                                                                                                                                                                                                                                                                                                                                                                                                                  |
| EPI_ISL_833585, EPI_ISL_833587, EPI_ISL_833588, EPI_ISL_833589, EPI_ISL_833591, EPI_ISL_833592, EPI_ISL_833594, EPI_ISL_833595, EPI_ISL_833598, EPI_ISL_833600, EPI_ISL_833601, EPI_ISL_833603, EPI_ISL_833605, EPI_ISL_833608, EPI_ISL_833613, EPI_ISL_833622, EPI_ISL_833623, EPI_ISL_833624, EPI_ISL_833625, EPI_ISL_833627, EPI_ISL_833628, EPI_ISL_833633, EPI_ISL_833637, EPI_ISL_833638, EPI_ISL_833639, EPI_ISL_833641, EPI_ISL_833642, EPI_ISL_833644, EPI_ISL_833645, EPI_ISL_833649, EPI_ISL_833653, EPI_ISL_833655, EPI_ISL_833657, EPI_ISL_833659, EPI_ISL_833660, EPI_ISL_833661, EPI_ISL_833663, EPI_ISL_833664, EPI_ISL_833666, EPI_ISL_833669, EPI_ISL_833672, EPI_ISL_833674, EPI_ISL_833675, EPI_ISL_833677, EPI_ISL_833681, EPI_ISL_833682, EPI_ISL_833688, EPI_ISL_833690, EPI_ISL_833692, EPI_ISL_833694, EPI_ISL_833697, EPI_ISL_833698, EPI_ISL_833699, EPI_ISL_833701, EPI_ISL_833711, EPI_ISL_833713, EPI_ISL_833715, EPI_ISL_833717, EPI_ISL_833718, EPI_ISL_833720, EPI_ISL_833722, EPI_ISL_833723, EPI_ISL_833729, EPI_ISL_833730, EPI_ISL_833731, EPI_ISL_833732, EPI_ISL_833737, EPI_ISL_833739, EPI_ISL_833740, EPI_ISL_833744, EPI_ISL_833747, EPI_ISL_833751, EPI_ISL_833752, EPI_ISL_833754, EPI_ISL_833757, EPI_ISL_833760, EPI_ISL_833761, EPI_ISL_833763, EPI_ISL_833764, EPI_ISL_833765, EPI_ISL_833769, EPI_ISL_833772, EPI_ISL_833775, EPI_ISL_833776, EPI_ISL_833777, EPI_ISL_833781, EPI_ISL_833782, EPI_ISL_833783, EPI_ISL_833785, EPI_ISL_833786, EPI_ISL_833787, EPI_ISL_833788, EPI_ISL_833790, EPI_ISL_833793, EPI_ISL_833798, EPI_ISL_833799, EPI_ISL_833802, EPI_ISL_833805, EPI_ISL_833808, EPI_ISL_833811, EPI_ISL_833819, EPI_ISL_833820, EPI_ISL_833822, EPI_ISL_833824, EPI_ISL_833825, EPI_ISL_833826, EPI_ISL_833827, EPI_ISL_833828, EPI_ISL_833836, EPI_ISL_833837, EPI_ISL_833838, EPI_ISL_833839, EPI_ISL_833843, EPI_ISL_833847, EPI_ISL_833850, EPI_ISL_833851, EPI_ISL_833857, EPI_ISL_833858, EPI_ISL_833867, EPI_ISL_833869, EPI_ISL_833870, EPI_ISL_833871, EPI_ISL_833873, EPI_ISL_833874, EPI_ISL_833875, EPI_ISL_833878, EPI_ISL_833880, EPI_ISL_833883, EPI_ISL_833885, EPI_ISL_833887, EPI_ISL_833891, EPI_ISL_833893, EPI_ISL_833897, EPI_ISL_833899, EPI_ISL_833900, EPI_ISL_833902, EPI_ISL_833904, EPI_ISL_833905, EPI_ISL_833906, EPI_ISL_833911, EPI_ISL_833913, EPI_ISL_833914, EPI_ISL_833915, EPI_ISL_833920, EPI_ISL_833921, EPI_ISL_833923, EPI_ISL_833925, EPI_ISL_833926, EPI_ISL_833927, EPI_ISL_833928, EPI_ISL_833929 | see above  | Lighthouse Lab in Cambridge                                                                                                                                                                                         | Wellcome Sanger Institute for the COVID-19 Genomics UK (COG-UK) Consortium           | Rob Howes, The Lighthouse Lab in Cambridge and Alex Alderton, Roberto Amato, Sonia Goncalves, Ewan Harrison, David K. Jackson, Ian Johnston, Dominic Kwiatkowski, Cordelia Langford, John Sillitoe on behalf of the Wellcome Sanger Institute COVID-19 Surveillance Team                                                                                                                                                                                                                                                                                                                                                                                                                   |
| EPI_ISL_835041                                                                                                                                                                                                                                                                                                                                                                                                                                                                                                                                                                                                                                                                                                                                                                                                                                                                                                                                                                                                                                                                                                                                                                                                                                                                                                                                                                                                                                                                                                                                                                                                                                                                                                                                                                                                                                                                                                                                                                                                                                                                                                                                                                                                                                                                                                                                                                                                                                                                                                 |            | Lighthouse Lab in Alderley Park                                                                                                                                                                                     | Wellcome Sanger Institute for the COVID-19 Genomics UK (COG-UK) Consortium           | Jacquelyn Wynn, Mairead Hyland, The Lighthouse Lab in Alderley Park and Alex Alderton, Roberto Amato, Sonia Goncalves, Ewan Harrison, David K. Jackson, Ian Johnston, Dominic Kwiatkowski, Cordelia Langford, John Sillitoe on behalf of the Wellcome Sanger Institute COVID-19 Surveillance Team                                                                                                                                                                                                                                                                                                                                                                                          |
| EPI_ISL_837056, EPI_ISL_837057, EPI_ISL_837059, EPI_ISL_837060, EPI_ISL_837063, EPI_ISL_837069, EPI_ISL_837073, EPI_ISL_837181, EPI_ISL_837182, EPI_ISL_837196, EPI_ISL_837197, EPI_ISL_837243, EPI_ISL_837244, EPI_ISL_837245                                                                                                                                                                                                                                                                                                                                                                                                                                                                                                                                                                                                                                                                                                                                                                                                                                                                                                                                                                                                                                                                                                                                                                                                                                                                                                                                                                                                                                                                                                                                                                                                                                                                                                                                                                                                                                                                                                                                                                                                                                                                                                                                                                                                                                                                                 | see above  | Respiratory Virus Unit, National Infection Service, Public Health England                                                                                                                                           | COVID-19 Genomics UK (COG-UK) Consortium                                             | PHE Covid Sequencing Team                                                                                                                                                                                                                                                                                                                                                                                                                                                                                                                                                                                                                                                                  |
| EPI_ISL_837957, EPI_ISL_837959, EPI_ISL_837973, EPI_ISL_837974, EPI_ISL_837975, EPI_ISL_837976, EPI_ISL_837977, EPI_ISL_837978, EPI_ISL_837979, EPI_ISL_837980, EPI_ISL_837982, EPI_ISL_837983, EPI_ISL_837984, EPI_ISL_837985, EPI_ISL_837986, EPI_ISL_837987, EPI_ISL_837988, EPI_ISL_837990, EPI_ISL_837991, EPI_ISL_837993, EPI_ISL_837997, EPI_ISL_838000, EPI_ISL_838001, EPI_ISL_838003, EPI_ISL_838004, EPI_ISL_838005, EPI_ISL_838006, EPI_ISL_838007, EPI_ISL_838008, EPI_ISL_838009, EPI_ISL_838010, EPI_ISL_838011, EPI_ISL_838012, EPI_ISL_838013, EPI_ISL_838014, EPI_ISL_838015, EPI_ISL_838016, EPI_ISL_838017, EPI_ISL_838018, EPI_ISL_838019, EPI_ISL_838020, EPI_ISL_838021, EPI_ISL_838022, EPI_ISL_838023, EPI_ISL_838024, EPI_ISL_838025, EPI_ISL_838026, EPI_ISL_838027, EPI_ISL_838028, EPI_ISL_838029, EPI_ISL_838030, EPI_ISL_838031, EPI_ISL_838032, EPI_ISL_838033, EPI_ISL_838035, EPI_ISL_838036, EPI_ISL_838038, EPI_ISL_838039, EPI_ISL_838040, EPI_ISL_838041, EPI_ISL_838042, EPI_ISL_838043, EPI_ISL_838044, EPI_ISL_838045, EPI_ISL_838046, EPI_ISL_838047, EPI_ISL_838048, EPI_ISL_838049, EPI_ISL_838050, EPI_ISL_838051, EPI_ISL_838052, EPI_ISL_838053, EPI_ISL_838054                                                                                                                                                                                                                                                                                                                                                                                                                                                                                                                                                                                                                                                                                                                                                                                                                                                                                                                                                                                                                                                                                                                                                                                                                                                                                                 | see above  | Department of Pathology, University of Cambridge                                                                                                                                                                    | COVID-19 Genomics UK (COG-UK) Consortium                                             | Aminu S. Jahun, Yasmin Chaudhry, Grant Hall, Iliana Georgana, Myra Hosmillo, Martin D. Curran, Malte Pinckert, Surendra Parmar, Ian Goodfellow                                                                                                                                                                                                                                                                                                                                                                                                                                                                                                                                             |
| EPI_ISL_838315                                                                                                                                                                                                                                                                                                                                                                                                                                                                                                                                                                                                                                                                                                                                                                                                                                                                                                                                                                                                                                                                                                                                                                                                                                                                                                                                                                                                                                                                                                                                                                                                                                                                                                                                                                                                                                                                                                                                                                                                                                                                                                                                                                                                                                                                                                                                                                                                                                                                                                 |            | University of Exeter                                                                                                                                                                                                | COVID-19 Genomics UK (COG-UK) Consortium                                             | Ben Temperton, Aaron Jeffries, Michelle Michelsen, Joanna Warwick-Dugdale, Audrey Farbos, Robyn Manley, Stephen Michell, Jane Masoli                                                                                                                                                                                                                                                                                                                                                                                                                                                                                                                                                       |
| EPI_ISL_838960, EPI_ISL_838961, EPI_ISL_838962, EPI_ISL_838963, EPI_ISL_838964, EPI_ISL_838965, EPI_ISL_838966, EPI_ISL_838967, EPI_ISL_838968, EPI_ISL_838970, EPI_ISL_838971, EPI_ISL_838972, EPI_ISL_838973, EPI_ISL_838974, EPI_ISL_838975, EPI_ISL_838976, EPI_ISL_838977, EPI_ISL_838978, EPI_ISL_838979, EPI_ISL_838980, EPI_ISL_838982, EPI_ISL_838983, EPI_ISL_838984, EPI_ISL_838985, EPI_ISL_838986, EPI_ISL_838987, EPI_ISL_838991, EPI_ISL_838992, EPI_ISL_838993, EPI_ISL_838994, EPI_ISL_838995, EPI_ISL_838996, EPI_ISL_838997, EPI_ISL_838998, EPI_ISL_838999, EPI_ISL_839000, EPI_ISL_839002, EPI_ISL_839003, EPI_ISL_839004, EPI_ISL_839005, EPI_ISL_839006, EPI_ISL_839007, EPI_ISL_839008, EPI_ISL_839009, EPI_ISL_839010, EPI_ISL_839011, EPI_ISL_839012, EPI_ISL_839014, EPI_ISL_839016, EPI_ISL_839017, EPI_ISL_839018, EPI_ISL_839019, EPI_ISL_839020, EPI_ISL_839021, EPI_ISL_839022, EPI_ISL_839023, EPI_ISL_839024, EPI_ISL_839025, EPI_ISL_839126, EPI_ISL_839127, EPI_ISL_839129, EPI_ISL_839130, EPI_ISL_839131, EPI_ISL_839132, EPI_ISL_839233, EPI_ISL_839234, EPI_ISL_839235, EPI_ISL_839236, EPI_ISL_839237, EPI_ISL_839238, EPI_ISL_839239, EPI_ISL_839240, EPI_ISL_839241, EPI_ISL_839242, EPI_ISL_839244, EPI_ISL_839245, EPI_ISL_839246, EPI_ISL_839247, EPI_ISL_839248, EPI_ISL_839249, EPI_ISL_839250, EPI_ISL_839251, EPI_ISL_839252, EPI_ISL_839293, EPI_ISL_839294, EPI_ISL_839295, EPI_ISL_839296, EPI_ISL_839297, EPI_ISL_839298, EPI_ISL_839299, EPI_ISL_839300                                                                                                                                                                                                                                                                                                                                                                                                                                                                                                                                                                                                                                                                                                                                                                                                                                                                                                                                                                                                 | see above  | University College London, Great Ormond Street Hospital for Children NHS Foundation Trust, Imperial College Healthcare NHS Trust                                                                                    | COVID-19 Genomics UK (COG-UK) Consortium                                             | Sergi Castellano, Rachel Williams, Mark Kristiansen, Paola Resende Silva, Sunando Roy, Tony Brooks, Helena Tutili, Paola Niola, Patricia Dyal, Charlotte Williams, Leysa Forrest, Yasmin Panchbhaya, Jacqueline Findlay, Samuel Weeks, Julianne Brown, Kathryn Harris, Paul Randell, James Price, Alison Holmes, Judith Breuer                                                                                                                                                                                                                                                                                                                                                             |
| EPI_ISL_840053, EPI_ISL_840054, EPI_ISL_840055, EPI_ISL_840056, EPI_ISL_840057, EPI_ISL_840058, EPI_ISL_840059, EPI_ISL_840060, EPI_ISL_840061                                                                                                                                                                                                                                                                                                                                                                                                                                                                                                                                                                                                                                                                                                                                                                                                                                                                                                                                                                                                                                                                                                                                                                                                                                                                                                                                                                                                                                                                                                                                                                                                                                                                                                                                                                                                                                                                                                                                                                                                                                                                                                                                                                                                                                                                                                                                                                 |            | Queens Medical Centre, Clinical Microbiology Department / DeepSeq Nottingham                                                                                                                                        | COVID-19 Genomics UK (COG-UK) Consortium                                             | Gemma Clark, Wendy Smith, Manjinder Khakh, Vicki M Fleming, Michelle M Lister, Hannah Howson-Wells, Jonathan Ball, Patrick McClure, Joseph Chappell, Theocharis Tsoileridis, Nadine Holmes, Matthew Carlisle, Christopher Moore, Fei Sang, Johnny Debebe, Victoria Wright, Matthew Loose                                                                                                                                                                                                                                                                                                                                                                                                   |
| EPI_ISL_841326, EPI_ISL_841328, EPI_ISL_841330, EPI_ISL_841331, EPI_ISL_841340, EPI_ISL_841349, EPI_ISL_841350, EPI_ISL_841351, EPI_ISL_841352, EPI_ISL_841426, EPI_ISL_841427, EPI_ISL_841430, EPI_ISL_841457, EPI_ISL_841484, EPI_ISL_841487, EPI_ISL_841488, EPI_ISL_841489, EPI_ISL_841492, EPI_ISL_841493, EPI_ISL_841494, EPI_ISL_841495, EPI_ISL_841496, EPI_ISL_841497, EPI_ISL_841523, EPI_ISL_841524, EPI_ISL_841525, EPI_ISL_841526, EPI_ISL_841527, EPI_ISL_841528, EPI_ISL_841530, EPI_ISL_841532, EPI_ISL_841533, EPI_ISL_841534, EPI_ISL_841535, EPI_ISL_841536, EPI_ISL_841537, EPI_ISL_841538, EPI_ISL_841539, EPI_ISL_841540, EPI_ISL_841541, EPI_ISL_841542, EPI_ISL_841543, EPI_ISL_841544, EPI_ISL_841545, EPI_ISL_841546, EPI_ISL_841547, EPI_ISL_841549, EPI_ISL_841550, EPI_ISL_841551, EPI_ISL_841552, EPI_ISL_841553, EPI_ISL_841554, EPI_ISL_841555, EPI_ISL_841556, EPI_ISL_841557, EPI_ISL_841558, EPI_ISL_841559, EPI_ISL_841614, EPI_ISL_841625, EPI_ISL_841659, EPI_ISL_841661, EPI_ISL_841665, EPI_ISL_841667, EPI_ISL_841669, EPI_ISL_841670, EPI_ISL_841673, EPI_ISL_841676, EPI_ISL_841677, EPI_ISL_841679, EPI_ISL_841684, EPI_ISL_841685, EPI_ISL_841686, EPI_ISL_841687, EPI_ISL_841688, EPI_ISL_841689, EPI_ISL_841690, EPI_ISL_841694, EPI_ISL_841695, EPI_ISL_841700, EPI_ISL_841702, EPI_ISL_841704, EPI_ISL_841705, EPI_ISL_841706, EPI_ISL_841707, EPI_ISL_841709, EPI_ISL_841710, EPI_ISL_841711, EPI_ISL_841712, EPI_ISL_841713, EPI_ISL_841714, EPI_ISL_841715, EPI_ISL_841716, EPI_ISL_841717, EPI_ISL_841718, EPI_ISL_841719, EPI_ISL_841720, EPI_ISL_841721, EPI_ISL_841722, EPI_ISL_841723, EPI_ISL_841724, EPI_ISL_841725, EPI_ISL_841726, EPI_ISL_841727, EPI_ISL_841728, EPI_ISL_841729, EPI_ISL_841730, EPI_ISL_841733, EPI_ISL_841734, EPI_ISL_841735, EPI_ISL_841736, EPI_ISL_841738, EPI_ISL_841739, EPI_ISL_841740, EPI_ISL_841741, EPI_ISL_841742, EPI_ISL_841743, EPI_ISL_841744, EPI_ISL_841745, EPI_ISL_841746, EPI_ISL_841747, EPI_ISL_841748, EPI_ISL_841749, EPI_ISL_841750, EPI_ISL_841751, EPI_ISL_841752, EPI_ISL_841753                                                                                                                                                                                                                                                                                                                                                                                                                 | see above  | Originating lab: Wales Specialist Virology Centre Sequencing lab: Pathogen Genomics Unit                                                                                                                            | Public Health Wales Microbiology Cardiff Wales Specialist Virology Centre            | Catherine Moore, Johnathan Evans, Laura Gifford, Malorie Perry, Simon Cottrell, Angela Marchbank, Alec Bircley, Alexander Adams, Amy Gaskin, Bree Gatica-Wilcox, Jason Coombes, Joel Southgate, Lauren Gilbert, Lee Graham, Nicole Pacchiarini, Sara Kumzienne-Summerhayes, Sarah Taylor, Sophie Jones, Sara Rey, Matthew Bull, Joanne Watkins, Sally Corden, Tom Connor                                                                                                                                                                                                                                                                                                                   |
| EPI_ISL_841921                                                                                                                                                                                                                                                                                                                                                                                                                                                                                                                                                                                                                                                                                                                                                                                                                                                                                                                                                                                                                                                                                                                                                                                                                                                                                                                                                                                                                                                                                                                                                                                                                                                                                                                                                                                                                                                                                                                                                                                                                                                                                                                                                                                                                                                                                                                                                                                                                                                                                                 |            | Centre for Enzyme Innovation, University of Portsmouth / Translational Research Laboratory, Portsmouth Hospitals NHS Trust                                                                                          | COVID-19 Genomics UK (COG-UK) Consortium                                             | Angela Beckett, Yann Bourgeois, Garry Scarlett, Sharon Glaysher, Scott Elliott, Kelly Bicknell, Robert Impey, Allyson Lloyd, Sarah Wyllie, Ethan Butcher, Anoop Chauhan, Samuel Robson                                                                                                                                                                                                                                                                                                                                                                                                                                                                                                     |
| EPI_ISL_842201, EPI_ISL_842207, EPI_ISL_842210, EPI_ISL_842213, EPI_ISL_842222, EPI_ISL_842223, EPI_ISL_842225, EPI_ISL_842229, EPI_ISL_842234, EPI_ISL_842236, EPI_ISL_842237, EPI_ISL_842238, EPI_ISL_842239, EPI_ISL_842302, EPI_ISL_842309, EPI_ISL_842310, EPI_ISL_842314, EPI_ISL_842320, EPI_ISL_842321, EPI_ISL_842323, EPI_ISL_842328, EPI_ISL_842331, EPI_ISL_842333, EPI_ISL_842336, EPI_ISL_842337, EPI_ISL_842343                                                                                                                                                                                                                                                                                                                                                                                                                                                                                                                                                                                                                                                                                                                                                                                                                                                                                                                                                                                                                                                                                                                                                                                                                                                                                                                                                                                                                                                                                                                                                                                                                                                                                                                                                                                                                                                                                                                                                                                                                                                                                 |            |                                                                                                                                                                                                                     |                                                                                      |                                                                                                                                                                                                                                                                                                                                                                                                                                                                                                                                                                                                                                                                                            |

|                                                                                                                                                                                                                                                                                                                                                                                                                                                                                                                                                                                                                                                                                                                                                                                                                                                                                                                                                                                                                                                                                                                                                                                                                                                                                                                                                                                                                                                                                                                                                                                                                                                                                                                                                                                                                                                                                                                                                                                                                                                                                                                                                                                                                                                                                                                                                                                                                                                                                                                                                                                                                                                                                                                                                                                                                                                                                                                                                                                                                                                                                                                                                                                                                                                                                                                                                                                                                                                                                                                                                                                                                                                                                                                                                                                                                                                                                                                                                                                                                                                                                                                                                                                                                                                                                                                                                                                                                                                                                                                                                                                                                                                                                                                                                                                                                                                                                                |                                                                                                                                                                                  |                                                                            |                                                                                                                                                                                                                                                                              |
|------------------------------------------------------------------------------------------------------------------------------------------------------------------------------------------------------------------------------------------------------------------------------------------------------------------------------------------------------------------------------------------------------------------------------------------------------------------------------------------------------------------------------------------------------------------------------------------------------------------------------------------------------------------------------------------------------------------------------------------------------------------------------------------------------------------------------------------------------------------------------------------------------------------------------------------------------------------------------------------------------------------------------------------------------------------------------------------------------------------------------------------------------------------------------------------------------------------------------------------------------------------------------------------------------------------------------------------------------------------------------------------------------------------------------------------------------------------------------------------------------------------------------------------------------------------------------------------------------------------------------------------------------------------------------------------------------------------------------------------------------------------------------------------------------------------------------------------------------------------------------------------------------------------------------------------------------------------------------------------------------------------------------------------------------------------------------------------------------------------------------------------------------------------------------------------------------------------------------------------------------------------------------------------------------------------------------------------------------------------------------------------------------------------------------------------------------------------------------------------------------------------------------------------------------------------------------------------------------------------------------------------------------------------------------------------------------------------------------------------------------------------------------------------------------------------------------------------------------------------------------------------------------------------------------------------------------------------------------------------------------------------------------------------------------------------------------------------------------------------------------------------------------------------------------------------------------------------------------------------------------------------------------------------------------------------------------------------------------------------------------------------------------------------------------------------------------------------------------------------------------------------------------------------------------------------------------------------------------------------------------------------------------------------------------------------------------------------------------------------------------------------------------------------------------------------------------------------------------------------------------------------------------------------------------------------------------------------------------------------------------------------------------------------------------------------------------------------------------------------------------------------------------------------------------------------------------------------------------------------------------------------------------------------------------------------------------------------------------------------------------------------------------------------------------------------------------------------------------------------------------------------------------------------------------------------------------------------------------------------------------------------------------------------------------------------------------------------------------------------------------------------------------------------------------------------------------------------------------------------------------------------------|----------------------------------------------------------------------------------------------------------------------------------------------------------------------------------|----------------------------------------------------------------------------|------------------------------------------------------------------------------------------------------------------------------------------------------------------------------------------------------------------------------------------------------------------------------|
| see above                                                                                                                                                                                                                                                                                                                                                                                                                                                                                                                                                                                                                                                                                                                                                                                                                                                                                                                                                                                                                                                                                                                                                                                                                                                                                                                                                                                                                                                                                                                                                                                                                                                                                                                                                                                                                                                                                                                                                                                                                                                                                                                                                                                                                                                                                                                                                                                                                                                                                                                                                                                                                                                                                                                                                                                                                                                                                                                                                                                                                                                                                                                                                                                                                                                                                                                                                                                                                                                                                                                                                                                                                                                                                                                                                                                                                                                                                                                                                                                                                                                                                                                                                                                                                                                                                                                                                                                                                                                                                                                                                                                                                                                                                                                                                                                                                                                                                      | Virology Department, Sheffield Teaching Hospitals NHS Foundation Trust/Department of Infection, Immunity and Cardiovascular Disease, The Medical School, University of Sheffield | COVID-19 Genomics UK (COG-UK) Consortium                                   | Thushan de Silva, Matthew Parker, Nikki Smith, Adri Anygal, Rebecca Brown, Luke Green, Rachel Tucker, Paul Parsons, Danielle Groves, Katie Johnson, Laura Carrilero, Alex Keeley, Dave Partridge, Matthew Wyles, Benjamin Lindsey, Mehmet Yavuz, Mohammad Raza, Carlad Evans |
| EPI_ISL_845894, EPI_ISL_845895, EPI_ISL_845897, EPI_ISL_845898, EPI_ISL_845899, EPI_ISL_845900, EPI_ISL_845901, EPI_ISL_845902, EPI_ISL_845903, EPI_ISL_845904, EPI_ISL_845905, EPI_ISL_845906, EPI_ISL_845907, EPI_ISL_845908, EPI_ISL_845909, EPI_ISL_845910, EPI_ISL_845911, EPI_ISL_845912, EPI_ISL_845913, EPI_ISL_845914, EPI_ISL_845915, EPI_ISL_845916, EPI_ISL_845917, EPI_ISL_845918, EPI_ISL_845919, EPI_ISL_845920, EPI_ISL_845921, EPI_ISL_845922, EPI_ISL_845923, EPI_ISL_845924, EPI_ISL_845925, EPI_ISL_845926, EPI_ISL_845927, EPI_ISL_845928, EPI_ISL_845929, EPI_ISL_845930, EPI_ISL_845931, EPI_ISL_845932, EPI_ISL_845933, EPI_ISL_845934, EPI_ISL_845935, EPI_ISL_845936, EPI_ISL_845937, EPI_ISL_845938, EPI_ISL_845939, EPI_ISL_845940, EPI_ISL_845941, EPI_ISL_845942, EPI_ISL_845943, EPI_ISL_845944, EPI_ISL_845945, EPI_ISL_845946, EPI_ISL_845947, EPI_ISL_845948, EPI_ISL_845949, EPI_ISL_845950, EPI_ISL_845951, EPI_ISL_845952, EPI_ISL_845953, EPI_ISL_845954, EPI_ISL_845955, EPI_ISL_845956, EPI_ISL_845957, EPI_ISL_845958, EPI_ISL_845959, EPI_ISL_845960, EPI_ISL_845961, EPI_ISL_845962, EPI_ISL_845963, EPI_ISL_845964, EPI_ISL_845965, EPI_ISL_845966, EPI_ISL_845967, EPI_ISL_845968, EPI_ISL_845969, EPI_ISL_845970, EPI_ISL_845971, EPI_ISL_845972, EPI_ISL_845974, EPI_ISL_845975, EPI_ISL_845976, EPI_ISL_845977, EPI_ISL_845978, EPI_ISL_845979, EPI_ISL_845980, EPI_ISL_845981, EPI_ISL_845982, EPI_ISL_845983, EPI_ISL_845984, EPI_ISL_845985, EPI_ISL_845986, EPI_ISL_845987, EPI_ISL_845988, EPI_ISL_845989, EPI_ISL_845990, EPI_ISL_845991, EPI_ISL_845992, EPI_ISL_845993, EPI_ISL_845994, EPI_ISL_845995, EPI_ISL_845996, EPI_ISL_845997, EPI_ISL_845998, EPI_ISL_845999, EPI_ISL_846000, EPI_ISL_846001, EPI_ISL_846002, EPI_ISL_846003, EPI_ISL_846004, EPI_ISL_846005, EPI_ISL_846006, EPI_ISL_846008, EPI_ISL_846009, EPI_ISL_846010, EPI_ISL_846011, EPI_ISL_846012, EPI_ISL_846013, EPI_ISL_846014, EPI_ISL_846015, EPI_ISL_846016, EPI_ISL_846017, EPI_ISL_846018, EPI_ISL_846019, EPI_ISL_846020, EPI_ISL_846021, EPI_ISL_846024, EPI_ISL_846025, EPI_ISL_846026, EPI_ISL_846027, EPI_ISL_846028, EPI_ISL_846029, EPI_ISL_846030, EPI_ISL_846031, EPI_ISL_846032, EPI_ISL_846033, EPI_ISL_846034, EPI_ISL_846035, EPI_ISL_846036, EPI_ISL_846037, EPI_ISL_846038, EPI_ISL_846039, EPI_ISL_846040, EPI_ISL_846041, EPI_ISL_846042, EPI_ISL_846043, EPI_ISL_846044, EPI_ISL_846045, EPI_ISL_846046, EPI_ISL_846047, EPI_ISL_846048, EPI_ISL_846049, EPI_ISL_846050, EPI_ISL_846051, EPI_ISL_846052, EPI_ISL_846053, EPI_ISL_846054, EPI_ISL_846055, EPI_ISL_846056, EPI_ISL_846057, EPI_ISL_846058, EPI_ISL_846060, EPI_ISL_846061, EPI_ISL_846062, EPI_ISL_846063, EPI_ISL_846064, EPI_ISL_846065, EPI_ISL_846066, EPI_ISL_846067, EPI_ISL_846068, EPI_ISL_846069, EPI_ISL_846071, EPI_ISL_846072, EPI_ISL_846073, EPI_ISL_846074, EPI_ISL_846075, EPI_ISL_846076, EPI_ISL_846077, EPI_ISL_846078, EPI_ISL_846079, EPI_ISL_846079, EPI_ISL_846080, EPI_ISL_846081, EPI_ISL_846082, EPI_ISL_846083, EPI_ISL_846085, EPI_ISL_846086, EPI_ISL_846087, EPI_ISL_846088, EPI_ISL_846089, EPI_ISL_846090, EPI_ISL_846091, EPI_ISL_846092, EPI_ISL_846093, EPI_ISL_846094, EPI_ISL_846095, EPI_ISL_846096, EPI_ISL_846097, EPI_ISL_846098, EPI_ISL_846099, EPI_ISL_846100, EPI_ISL_846101, EPI_ISL_846102, EPI_ISL_846103, EPI_ISL_846104, EPI_ISL_846105, EPI_ISL_846106, EPI_ISL_846107, EPI_ISL_846108, EPI_ISL_846109, EPI_ISL_846110, EPI_ISL_846111, EPI_ISL_846112, EPI_ISL_846113, EPI_ISL_846114, EPI_ISL_846115, EPI_ISL_846116, EPI_ISL_846117, EPI_ISL_846118, EPI_ISL_846119, EPI_ISL_846120, EPI_ISL_846121, EPI_ISL_846122, EPI_ISL_846123, EPI_ISL_846124, EPI_ISL_846125, EPI_ISL_846126, EPI_ISL_846127, EPI_ISL_846128, EPI_ISL_846129, EPI_ISL_846130, EPI_ISL_846131, EPI_ISL_846132, EPI_ISL_846133, EPI_ISL_846134, EPI_ISL_846135, EPI_ISL_846136, EPI_ISL_846137, EPI_ISL_846138, EPI_ISL_846140, EPI_ISL_846141, EPI_ISL_846142, EPI_ISL_846143, EPI_ISL_846144, EPI_ISL_846145, EPI_ISL_846146, EPI_ISL_846148, EPI_ISL_846149, EPI_ISL_846150, EPI_ISL_846151, EPI_ISL_846153, EPI_ISL_846154, EPI_ISL_846155, EPI_ISL_846156, EPI_ISL_846157, EPI_ISL_846158, EPI_ISL_846159, EPI_ISL_846160, EPI_ISL_846161, EPI_ISL_846162, EPI_ISL_846163, EPI_ISL_846164, EPI_ISL_846165, EPI_ISL_846166, EPI_ISL_846167, EPI_ISL_846169, EPI_ISL_846170, EPI_ISL_846172, EPI_ISL_846173, EPI_ISL_846174, EPI_ISL_846175, EPI_ISL_846176, EPI_ISL_846177, EPI_ISL_846178, EPI_ISL_846179, EPI_ISL_846180, EPI_ISL_846181, EPI_ISL_846182, EPI_ISL_846183, EPI_ISL_846184, EPI_ISL_846185, EPI_ISL_846186, EPI_ISL_846187, EPI_ISL_846188, EPI_ISL_846189, EPI_ISL_846190, EPI_ISL_846191, EPI_ISL_846192, EPI_ISL_846193, EPI_ISL_846194, EPI_ISL_846195, EPI_ISL_846196, EPI_ISL_846197, EPI_ISL_846198, EPI_ISL_846199 |                                                                                                                                                                                  |                                                                            |                                                                                                                                                                                                                                                                              |
| see above                                                                                                                                                                                                                                                                                                                                                                                                                                                                                                                                                                                                                                                                                                                                                                                                                                                                                                                                                                                                                                                                                                                                                                                                                                                                                                                                                                                                                                                                                                                                                                                                                                                                                                                                                                                                                                                                                                                                                                                                                                                                                                                                                                                                                                                                                                                                                                                                                                                                                                                                                                                                                                                                                                                                                                                                                                                                                                                                                                                                                                                                                                                                                                                                                                                                                                                                                                                                                                                                                                                                                                                                                                                                                                                                                                                                                                                                                                                                                                                                                                                                                                                                                                                                                                                                                                                                                                                                                                                                                                                                                                                                                                                                                                                                                                                                                                                                                      | Lighthouse Lab in Cambridge                                                                                                                                                      | Wellcome Sanger Institute for the COVID-19 Genomics UK (COG-UK) Consortium | Rob Howes, The Lighthouse Lab in Cambridge and Alex Alderton, Roberto Amato, Sonia Goncalves, Ewan Harrison, David K. Jackson, Ian Johnston, Dominic Kwiatkowski, Cordelia Langford, John Sillitoe on behalf of the Wellcome Sanger Institute COVID-19 Surveillance Team     |
| EPI_ISL_846200, EPI_ISL_846201, EPI_ISL_846202, EPI_ISL_846203, EPI_ISL_846204, EPI_ISL_846205, EPI_ISL_846206, EPI_ISL_846207, EPI_ISL_846208, EPI_ISL_846209, EPI_ISL_846210, EPI_ISL_846211, EPI_ISL_846212, EPI_ISL_846213, EPI_ISL_846214, EPI_ISL_846215, EPI_ISL_846216, EPI_ISL_846217, EPI_ISL_846218, EPI_ISL_846219, EPI_ISL_846220, EPI_ISL_846221, EPI_ISL_846222, EPI_ISL_846223, EPI_ISL_8462                                                                                                                                                                                                                                                                                                                                                                                                                                                                                                                                                                                                                                                                                                                                                                                                                                                                                                                                                                                                                                                                                                                                                                                                                                                                                                                                                                                                                                                                                                                                                                                                                                                                                                                                                                                                                                                                                                                                                                                                                                                                                                                                                                                                                                                                                                                                                                                                                                                                                                                                                                                                                                                                                                                                                                                                                                                                                                                                                                                                                                                                                                                                                                                                                                                                                                                                                                                                                                                                                                                                                                                                                                                                                                                                                                                                                                                                                                                                                                                                                                                                                                                                                                                                                                                                                                                                                                                                                                                                                   |                                                                                                                                                                                  |                                                                            |                                                                                                                                                                                                                                                                              |

[illegible]

[illegible]

[illegible]

[illegible]

[illegible]



[illegible]

[illegible]

[illegible]

[illegible]

[illegible]

|                                                                                                                                                                                                                                                                                                                                                                                                                                                                                                                                                                                                                                                                                                                                                                                                                                                                                                                                                                                                                                                                                                                                                                                                                                                                                                                                                                                                                                                                                                                                                                                                                                                                                                                                                                                                                                                                                                                                                                                                                                                                                                                                                                                                                                                                                                                                                                                                                                                                                                                                                                                                                                                                                                                                                                                                                                                                                                                                                                                                                                                                                                                                                                                                                                                                                                                                                                                                                                                                                                                                                                                                                                                |                                 |                                                                            |                                                                                                                                                                                                                                                                                                             |
|------------------------------------------------------------------------------------------------------------------------------------------------------------------------------------------------------------------------------------------------------------------------------------------------------------------------------------------------------------------------------------------------------------------------------------------------------------------------------------------------------------------------------------------------------------------------------------------------------------------------------------------------------------------------------------------------------------------------------------------------------------------------------------------------------------------------------------------------------------------------------------------------------------------------------------------------------------------------------------------------------------------------------------------------------------------------------------------------------------------------------------------------------------------------------------------------------------------------------------------------------------------------------------------------------------------------------------------------------------------------------------------------------------------------------------------------------------------------------------------------------------------------------------------------------------------------------------------------------------------------------------------------------------------------------------------------------------------------------------------------------------------------------------------------------------------------------------------------------------------------------------------------------------------------------------------------------------------------------------------------------------------------------------------------------------------------------------------------------------------------------------------------------------------------------------------------------------------------------------------------------------------------------------------------------------------------------------------------------------------------------------------------------------------------------------------------------------------------------------------------------------------------------------------------------------------------------------------------------------------------------------------------------------------------------------------------------------------------------------------------------------------------------------------------------------------------------------------------------------------------------------------------------------------------------------------------------------------------------------------------------------------------------------------------------------------------------------------------------------------------------------------------------------------------------------------------------------------------------------------------------------------------------------------------------------------------------------------------------------------------------------------------------------------------------------------------------------------------------------------------------------------------------------------------------------------------------------------------------------------------------------------------|---------------------------------|----------------------------------------------------------------------------|-------------------------------------------------------------------------------------------------------------------------------------------------------------------------------------------------------------------------------------------------------------------------------------------------------------|
| EPI_ISL_863450                                                                                                                                                                                                                                                                                                                                                                                                                                                                                                                                                                                                                                                                                                                                                                                                                                                                                                                                                                                                                                                                                                                                                                                                                                                                                                                                                                                                                                                                                                                                                                                                                                                                                                                                                                                                                                                                                                                                                                                                                                                                                                                                                                                                                                                                                                                                                                                                                                                                                                                                                                                                                                                                                                                                                                                                                                                                                                                                                                                                                                                                                                                                                                                                                                                                                                                                                                                                                                                                                                                                                                                                                                 | Lighthouse Lab in Glasgow       | Wellcome Sanger Institute for the COVID-19 Genomics UK (COG-UK) Consortium | Harper VanSteenhouse, Yumi Kasai, David Gray, Carol Clugston, Anna Dominiczak and Alex Alderton, Roberto Amato, Sonia Goncalves, Ewan Harrison, David K. Jackson, Ian Johnston, Dominic Kwiatkowski, Cordelia Langford, John Sillitoe on behalf of the Wellcome Sanger Institute COVID-19 Surveillance Team |
| EPI_ISL_863454, EPI_ISL_863461, EPI_ISL_863467, EPI_ISL_863470, EPI_ISL_863477, EPI_ISL_863479, EPI_ISL_863484, EPI_ISL_863491, EPI_ISL_863503, EPI_ISL_863504, EPI_ISL_863506, EPI_ISL_863514, EPI_ISL_863515, EPI_ISL_863516                                                                                                                                                                                                                                                                                                                                                                                                                                                                                                                                                                                                                                                                                                                                                                                                                                                                                                                                                                                                                                                                                                                                                                                                                                                                                                                                                                                                                                                                                                                                                                                                                                                                                                                                                                                                                                                                                                                                                                                                                                                                                                                                                                                                                                                                                                                                                                                                                                                                                                                                                                                                                                                                                                                                                                                                                                                                                                                                                                                                                                                                                                                                                                                                                                                                                                                                                                                                                 |                                 |                                                                            |                                                                                                                                                                                                                                                                                                             |
| see above                                                                                                                                                                                                                                                                                                                                                                                                                                                                                                                                                                                                                                                                                                                                                                                                                                                                                                                                                                                                                                                                                                                                                                                                                                                                                                                                                                                                                                                                                                                                                                                                                                                                                                                                                                                                                                                                                                                                                                                                                                                                                                                                                                                                                                                                                                                                                                                                                                                                                                                                                                                                                                                                                                                                                                                                                                                                                                                                                                                                                                                                                                                                                                                                                                                                                                                                                                                                                                                                                                                                                                                                                                      | Lighthouse Lab in Alderley Park | Wellcome Sanger Institute for the COVID-19 Genomics UK (COG-UK) Consortium | Jacquelyn Wynn, Mairead Hyland, The Lighthouse Lab in Alderley Park and Alex Alderton, Roberto Amato, Sonia Goncalves, Ewan Harrison, David K. Jackson, Ian Johnston, Dominic Kwiatkowski, Cordelia Langford, John Sillitoe on behalf of the Wellcome Sanger Institute COVID-19 Surveillance Team           |
| EPI_ISL_863518                                                                                                                                                                                                                                                                                                                                                                                                                                                                                                                                                                                                                                                                                                                                                                                                                                                                                                                                                                                                                                                                                                                                                                                                                                                                                                                                                                                                                                                                                                                                                                                                                                                                                                                                                                                                                                                                                                                                                                                                                                                                                                                                                                                                                                                                                                                                                                                                                                                                                                                                                                                                                                                                                                                                                                                                                                                                                                                                                                                                                                                                                                                                                                                                                                                                                                                                                                                                                                                                                                                                                                                                                                 | Lighthouse Lab in Glasgow       | Wellcome Sanger Institute for the COVID-19 Genomics UK (COG-UK) Consortium | Harper VanSteenhouse, Yumi Kasai, David Gray, Carol Clugston, Anna Dominiczak and Alex Alderton, Roberto Amato, Sonia Goncalves, Ewan Harrison, David K. Jackson, Ian Johnston, Dominic Kwiatkowski, Cordelia Langford, John Sillitoe on behalf of the Wellcome Sanger Institute COVID-19 Surveillance Team |
| EPI_ISL_863519, EPI_ISL_863520, EPI_ISL_863524, EPI_ISL_863527, EPI_ISL_863529                                                                                                                                                                                                                                                                                                                                                                                                                                                                                                                                                                                                                                                                                                                                                                                                                                                                                                                                                                                                                                                                                                                                                                                                                                                                                                                                                                                                                                                                                                                                                                                                                                                                                                                                                                                                                                                                                                                                                                                                                                                                                                                                                                                                                                                                                                                                                                                                                                                                                                                                                                                                                                                                                                                                                                                                                                                                                                                                                                                                                                                                                                                                                                                                                                                                                                                                                                                                                                                                                                                                                                 | Lighthouse Lab in Alderley Park | Wellcome Sanger Institute for the COVID-19 Genomics UK (COG-UK) Consortium | Jacquelyn Wynn, Mairead Hyland, The Lighthouse Lab in Alderley Park and Alex Alderton, Roberto Amato, Sonia Goncalves, Ewan Harrison, David K. Jackson, Ian Johnston, Dominic Kwiatkowski, Cordelia Langford, John Sillitoe on behalf of the Wellcome Sanger Institute COVID-19 Surveillance Team           |
| EPI_ISL_863531, EPI_ISL_863533, EPI_ISL_863537, EPI_ISL_863539, EPI_ISL_863540, EPI_ISL_863542, EPI_ISL_863543, EPI_ISL_863544, EPI_ISL_863546, EPI_ISL_863547, EPI_ISL_863549, EPI_ISL_863551, EPI_ISL_863552, EPI_ISL_863553, EPI_ISL_863555, EPI_ISL_863556, EPI_ISL_863557, EPI_ISL_863558, EPI_ISL_863560, EPI_ISL_863561, EPI_ISL_863562, EPI_ISL_863565, EPI_ISL_863566, EPI_ISL_863567, EPI_ISL_863570, EPI_ISL_863572, EPI_ISL_863574, EPI_ISL_863576, EPI_ISL_863577, EPI_ISL_863578, EPI_ISL_863579, EPI_ISL_863580, EPI_ISL_863581, EPI_ISL_863582, EPI_ISL_863583, EPI_ISL_863584, EPI_ISL_863586, EPI_ISL_863587, EPI_ISL_863588, EPI_ISL_863589, EPI_ISL_863591, EPI_ISL_863592, EPI_ISL_863593, EPI_ISL_863594, EPI_ISL_863595, EPI_ISL_863599, EPI_ISL_863601, EPI_ISL_863603, EPI_ISL_863604, EPI_ISL_863605, EPI_ISL_863606, EPI_ISL_863608, EPI_ISL_863609, EPI_ISL_863610, EPI_ISL_863612, EPI_ISL_863614, EPI_ISL_863616, EPI_ISL_863618, EPI_ISL_863619, EPI_ISL_863621, EPI_ISL_863622, EPI_ISL_863623, EPI_ISL_863625, EPI_ISL_863626, EPI_ISL_863627, EPI_ISL_863628, EPI_ISL_863629, EPI_ISL_863630, EPI_ISL_863633, EPI_ISL_863636, EPI_ISL_863640, EPI_ISL_863641, EPI_ISL_863643, EPI_ISL_863644, EPI_ISL_863647, EPI_ISL_863648, EPI_ISL_863649, EPI_ISL_863650, EPI_ISL_863652, EPI_ISL_863654, EPI_ISL_863655, EPI_ISL_863656, EPI_ISL_863658, EPI_ISL_863659, EPI_ISL_863661, EPI_ISL_863662, EPI_ISL_863663, EPI_ISL_863664, EPI_ISL_863665, EPI_ISL_863666, EPI_ISL_863667, EPI_ISL_863668, EPI_ISL_863670, EPI_ISL_863671, EPI_ISL_863672, EPI_ISL_863673, EPI_ISL_863674, EPI_ISL_863675, EPI_ISL_863676, EPI_ISL_863680, EPI_ISL_863682, EPI_ISL_863683, EPI_ISL_863684, EPI_ISL_863685, EPI_ISL_863686, EPI_ISL_863687, EPI_ISL_863688, EPI_ISL_863689, EPI_ISL_863691, EPI_ISL_863692, EPI_ISL_863693, EPI_ISL_863694, EPI_ISL_863695, EPI_ISL_863696, EPI_ISL_863697, EPI_ISL_863698, EPI_ISL_863701, EPI_ISL_863702, EPI_ISL_863703, EPI_ISL_863704, EPI_ISL_863706, EPI_ISL_863708, EPI_ISL_863710, EPI_ISL_863712, EPI_ISL_863713, EPI_ISL_863714, EPI_ISL_863716, EPI_ISL_863717, EPI_ISL_863718, EPI_ISL_863719, EPI_ISL_863720, EPI_ISL_863722, EPI_ISL_863724, EPI_ISL_863727, EPI_ISL_863728, EPI_ISL_863730, EPI_ISL_863731, EPI_ISL_863735, EPI_ISL_863736, EPI_ISL_863737, EPI_ISL_863738, EPI_ISL_863739, EPI_ISL_863740, EPI_ISL_863743, EPI_ISL_863744, EPI_ISL_863745, EPI_ISL_863748, EPI_ISL_863749, EPI_ISL_863750, EPI_ISL_863751, EPI_ISL_863752, EPI_ISL_863753, EPI_ISL_863754, EPI_ISL_863755, EPI_ISL_863756, EPI_ISL_863757, EPI_ISL_863758, EPI_ISL_863760, EPI_ISL_863763, EPI_ISL_863764, EPI_ISL_863765, EPI_ISL_863767, EPI_ISL_863768, EPI_ISL_863769, EPI_ISL_863770, EPI_ISL_863771, EPI_ISL_863772, EPI_ISL_863773, EPI_ISL_863774, EPI_ISL_863775, EPI_ISL_863777, EPI_ISL_863778, EPI_ISL_863779, EPI_ISL_863780, EPI_ISL_863800, EPI_ISL_863801, EPI_ISL_863802, EPI_ISL_863807, EPI_ISL_863808, EPI_ISL_863813, EPI_ISL_863814, EPI_ISL_863815, EPI_ISL_863816, EPI_ISL_863817, EPI_ISL_863818, EPI_ISL_863819, EPI_ISL_863820, EPI_ISL_863821, EPI_ISL_863822, EPI_ISL_863823, EPI_ISL_863824, EPI_ISL_863825, EPI_ISL_863826, EPI_ISL_863827, EPI_ISL_863828, EPI_ISL_863829, EPI_ISL_863832, EPI_ISL_863833, EPI_ISL_863834, EPI_ISL_863835, EPI_ISL_863836, EPI_ISL_863837, EPI_ISL_863839, EPI_ISL_863840, EPI_ISL_863843, EPI_ISL_863844, EPI_ISL_863846, EPI_ISL_863849, EPI_ISL_863852, EPI_ISL_863854, EPI_ISL_863855, EPI_ISL_863857, EPI_ISL_863859, EPI_ISL_863861, EPI_ISL_863862, EPI_ISL_863864, EPI_ISL_863866, EPI_ISL_863867, EPI_ISL_863868 |                                 |                                                                            |                                                                                                                                                                                                                                                                                                             |
| see above                                                                                                                                                                                                                                                                                                                                                                                                                                                                                                                                                                                                                                                                                                                                                                                                                                                                                                                                                                                                                                                                                                                                                                                                                                                                                                                                                                                                                                                                                                                                                                                                                                                                                                                                                                                                                                                                                                                                                                                                                                                                                                                                                                                                                                                                                                                                                                                                                                                                                                                                                                                                                                                                                                                                                                                                                                                                                                                                                                                                                                                                                                                                                                                                                                                                                                                                                                                                                                                                                                                                                                                                                                      | Lighthouse Lab in Milton Keynes | Wellcome Sanger Institute for the COVID-19 Genomics UK (COG-UK) Consortium | The Lighthouse Lab in Milton Keynes and Alex Alderton, Roberto Amato, Sonia Goncalves, Ewan Harrison, David K. Jackson, Ian Johnston, Dominic Kwiatkowski, Cordelia Langford, John Sillitoe on behalf of the Wellcome Sanger Institute COVID-19 Surveillance Team                                           |
| EPI_ISL_863869, EPI_ISL_863870, EPI_ISL_863871, EPI_ISL_863872, EPI_ISL_863873, EPI_ISL_863875, EPI_ISL_863876, EPI_ISL_863877, EPI_ISL_863878, EPI_ISL_863879, EPI_ISL_863880, EPI_ISL_863881, EPI_ISL_863882, EPI_ISL_863884, EPI_ISL_863885, EPI_ISL_863886, EPI_ISL_863887, EPI_ISL_863888, EPI_ISL_863889, EPI_ISL_863890, EPI_ISL_863891, EPI_ISL_863892, EPI_ISL_863893, EPI_ISL_863894, EPI_ISL_863895, EPI_ISL_863897, EPI_ISL_863898                                                                                                                                                                                                                                                                                                                                                                                                                                                                                                                                                                                                                                                                                                                                                                                                                                                                                                                                                                                                                                                                                                                                                                                                                                                                                                                                                                                                                                                                                                                                                                                                                                                                                                                                                                                                                                                                                                                                                                                                                                                                                                                                                                                                                                                                                                                                                                                                                                                                                                                                                                                                                                                                                                                                                                                                                                                                                                                                                                                                                                                                                                                                                                                                 |                                 |                                                                            |                                                                                                                                                                                                                                                                                                             |
| see above                                                                                                                                                                                                                                                                                                                                                                                                                                                                                                                                                                                                                                                                                                                                                                                                                                                                                                                                                                                                                                                                                                                                                                                                                                                                                                                                                                                                                                                                                                                                                                                                                                                                                                                                                                                                                                                                                                                                                                                                                                                                                                                                                                                                                                                                                                                                                                                                                                                                                                                                                                                                                                                                                                                                                                                                                                                                                                                                                                                                                                                                                                                                                                                                                                                                                                                                                                                                                                                                                                                                                                                                                                      | Lighthouse Lab in Alderley Park | Wellcome Sanger Institute for the COVID-19 Genomics UK (COG-UK) Consortium | Jacquelyn Wynn, Mairead Hyland, The Lighthouse Lab in Alderley Park and Alex Alderton, Roberto Amato, Sonia Goncalves, Ewan Harrison, David K. Jackson, Ian Johnston, Dominic Kwiatkowski, Cordelia Langford, John Sillitoe on behalf of the Wellcome Sanger Institute COVID-19 Surveillance Team           |
| EPI_ISL_863899                                                                                                                                                                                                                                                                                                                                                                                                                                                                                                                                                                                                                                                                                                                                                                                                                                                                                                                                                                                                                                                                                                                                                                                                                                                                                                                                                                                                                                                                                                                                                                                                                                                                                                                                                                                                                                                                                                                                                                                                                                                                                                                                                                                                                                                                                                                                                                                                                                                                                                                                                                                                                                                                                                                                                                                                                                                                                                                                                                                                                                                                                                                                                                                                                                                                                                                                                                                                                                                                                                                                                                                                                                 | Lighthouse Lab in Milton Keynes | Wellcome Sanger Institute for the COVID-19 Genomics UK (COG-UK) Consortium | The Lighthouse Lab in Milton Keynes and Alex Alderton, Roberto Amato, Sonia Goncalves, Ewan Harrison, David K.                                                                                                                                                                                              |

[illegible]

|                                                                                                                                                                                                                                                                                                                                                                                                                                                                                                                                                                                                                                                                                                                                                                                                                                                                                                                                                                                                                                                                                                                                                                                                                                                                                                                                                                                                                                                                                                                                                                                                                                                                                                                                                                                                                                                                                                                                                                                                                                                                                                                                                                                                                                                                                                                                                                                                                                                                                                                                                                                                                                                                                                                                                                                                                                                                                                |                                |                                                                                                                                                                                                 |                                                                            |                                                                                                                                                                                                                                                                                                                                                                                                                                                                                                                                                                                                                                                                                          |
|------------------------------------------------------------------------------------------------------------------------------------------------------------------------------------------------------------------------------------------------------------------------------------------------------------------------------------------------------------------------------------------------------------------------------------------------------------------------------------------------------------------------------------------------------------------------------------------------------------------------------------------------------------------------------------------------------------------------------------------------------------------------------------------------------------------------------------------------------------------------------------------------------------------------------------------------------------------------------------------------------------------------------------------------------------------------------------------------------------------------------------------------------------------------------------------------------------------------------------------------------------------------------------------------------------------------------------------------------------------------------------------------------------------------------------------------------------------------------------------------------------------------------------------------------------------------------------------------------------------------------------------------------------------------------------------------------------------------------------------------------------------------------------------------------------------------------------------------------------------------------------------------------------------------------------------------------------------------------------------------------------------------------------------------------------------------------------------------------------------------------------------------------------------------------------------------------------------------------------------------------------------------------------------------------------------------------------------------------------------------------------------------------------------------------------------------------------------------------------------------------------------------------------------------------------------------------------------------------------------------------------------------------------------------------------------------------------------------------------------------------------------------------------------------------------------------------------------------------------------------------------------------|--------------------------------|-------------------------------------------------------------------------------------------------------------------------------------------------------------------------------------------------|----------------------------------------------------------------------------|------------------------------------------------------------------------------------------------------------------------------------------------------------------------------------------------------------------------------------------------------------------------------------------------------------------------------------------------------------------------------------------------------------------------------------------------------------------------------------------------------------------------------------------------------------------------------------------------------------------------------------------------------------------------------------------|
| EPI_ISL_864203, EPI_ISL_864205, EPI_ISL_864206, EPI_ISL_864207, EPI_ISL_864208, EPI_ISL_864209, EPI_ISL_864210, EPI_ISL_864212, EPI_ISL_864214, EPI_ISL_864215, EPI_ISL_864218, EPI_ISL_864219, EPI_ISL_864220, EPI_ISL_864222, EPI_ISL_864223, EPI_ISL_864224, EPI_ISL_864225                                                                                                                                                                                                                                                                                                                                                                                                                                                                                                                                                                                                                                                                                                                                                                                                                                                                                                                                                                                                                                                                                                                                                                                                                                                                                                                                                                                                                                                                                                                                                                                                                                                                                                                                                                                                                                                                                                                                                                                                                                                                                                                                                                                                                                                                                                                                                                                                                                                                                                                                                                                                                 | see above                      | Lighthouse Lab in Milton Keynes                                                                                                                                                                 | Wellcome Sanger Institute for the COVID-19 Genomics UK (COG-UK) Consortium | The Lighthouse Lab in Milton Keynes and Alex Alderton, Roberto Amato, Sonia Goncalves, Ewan Harrison, David K. Jackson, Ian Johnston, Dominic Kwiatkowski, Cordelia Langford, John Sillitoe on behalf of the Wellcome Sanger Institute COVID-19 Surveillance Team                                                                                                                                                                                                                                                                                                                                                                                                                        |
| EPI_ISL_864226                                                                                                                                                                                                                                                                                                                                                                                                                                                                                                                                                                                                                                                                                                                                                                                                                                                                                                                                                                                                                                                                                                                                                                                                                                                                                                                                                                                                                                                                                                                                                                                                                                                                                                                                                                                                                                                                                                                                                                                                                                                                                                                                                                                                                                                                                                                                                                                                                                                                                                                                                                                                                                                                                                                                                                                                                                                                                 | EPI_ISL_864226                 | Lighthouse Lab in Alderley Park                                                                                                                                                                 | Wellcome Sanger Institute for the COVID-19 Genomics UK (COG-UK) Consortium | Jacquelyn Wynn, Mairead Hyland, The Lighthouse Lab in Alderley Park and Alex Alderton, Roberto Amato, Sonia Goncalves, Ewan Harrison, David K. Jackson, Ian Johnston, Dominic Kwiatkowski, Cordelia Langford, John Sillitoe on behalf of the Wellcome Sanger Institute COVID-19 Surveillance Team                                                                                                                                                                                                                                                                                                                                                                                        |
| EPI_ISL_864229, EPI_ISL_864231, EPI_ISL_864232, EPI_ISL_864233, EPI_ISL_864234, EPI_ISL_864235, EPI_ISL_864236, EPI_ISL_864237, EPI_ISL_864238, EPI_ISL_864240, EPI_ISL_864241, EPI_ISL_864242, EPI_ISL_864243, EPI_ISL_864245, EPI_ISL_864246, EPI_ISL_864247, EPI_ISL_864248, EPI_ISL_864249, EPI_ISL_864250, EPI_ISL_864251, EPI_ISL_864252, EPI_ISL_864253, EPI_ISL_864254, EPI_ISL_864256, EPI_ISL_864257, EPI_ISL_864258, EPI_ISL_864259, EPI_ISL_864260, EPI_ISL_864261, EPI_ISL_864263, EPI_ISL_864264, EPI_ISL_864265                                                                                                                                                                                                                                                                                                                                                                                                                                                                                                                                                                                                                                                                                                                                                                                                                                                                                                                                                                                                                                                                                                                                                                                                                                                                                                                                                                                                                                                                                                                                                                                                                                                                                                                                                                                                                                                                                                                                                                                                                                                                                                                                                                                                                                                                                                                                                                 | see above                      | Lighthouse Lab in Milton Keynes                                                                                                                                                                 | Wellcome Sanger Institute for the COVID-19 Genomics UK (COG-UK) Consortium | The Lighthouse Lab in Milton Keynes and Alex Alderton, Roberto Amato, Sonia Goncalves, Ewan Harrison, David K. Jackson, Ian Johnston, Dominic Kwiatkowski, Cordelia Langford, John Sillitoe on behalf of the Wellcome Sanger Institute COVID-19 Surveillance Team                                                                                                                                                                                                                                                                                                                                                                                                                        |
| EPI_ISL_864267                                                                                                                                                                                                                                                                                                                                                                                                                                                                                                                                                                                                                                                                                                                                                                                                                                                                                                                                                                                                                                                                                                                                                                                                                                                                                                                                                                                                                                                                                                                                                                                                                                                                                                                                                                                                                                                                                                                                                                                                                                                                                                                                                                                                                                                                                                                                                                                                                                                                                                                                                                                                                                                                                                                                                                                                                                                                                 | EPI_ISL_864267                 | Lighthouse Lab in Alderley Park                                                                                                                                                                 | Wellcome Sanger Institute for the COVID-19 Genomics UK (COG-UK) Consortium | Jacquelyn Wynn, Mairead Hyland, The Lighthouse Lab in Alderley Park and Alex Alderton, Roberto Amato, Sonia Goncalves, Ewan Harrison, David K. Jackson, Ian Johnston, Dominic Kwiatkowski, Cordelia Langford, John Sillitoe on behalf of the Wellcome Sanger Institute COVID-19 Surveillance Team                                                                                                                                                                                                                                                                                                                                                                                        |
| EPI_ISL_864268, EPI_ISL_864269, EPI_ISL_864270, EPI_ISL_864271, EPI_ISL_864272, EPI_ISL_864273, EPI_ISL_864275, EPI_ISL_864277, EPI_ISL_864278, EPI_ISL_864279, EPI_ISL_864280, EPI_ISL_864282, EPI_ISL_864283, EPI_ISL_864284, EPI_ISL_864285, EPI_ISL_864286, EPI_ISL_864287, EPI_ISL_864289, EPI_ISL_864290, EPI_ISL_864292, EPI_ISL_864293, EPI_ISL_864294, EPI_ISL_864295, EPI_ISL_864296, EPI_ISL_864298, EPI_ISL_864299, EPI_ISL_864300, EPI_ISL_864302, EPI_ISL_864303, EPI_ISL_864304, EPI_ISL_864306, EPI_ISL_864307                                                                                                                                                                                                                                                                                                                                                                                                                                                                                                                                                                                                                                                                                                                                                                                                                                                                                                                                                                                                                                                                                                                                                                                                                                                                                                                                                                                                                                                                                                                                                                                                                                                                                                                                                                                                                                                                                                                                                                                                                                                                                                                                                                                                                                                                                                                                                                 | see above                      | Lighthouse Lab in Milton Keynes                                                                                                                                                                 | Wellcome Sanger Institute for the COVID-19 Genomics UK (COG-UK) Consortium | The Lighthouse Lab in Milton Keynes and Alex Alderton, Roberto Amato, Sonia Goncalves, Ewan Harrison, David K. Jackson, Ian Johnston, Dominic Kwiatkowski, Cordelia Langford, John Sillitoe on behalf of the Wellcome Sanger Institute COVID-19 Surveillance Team                                                                                                                                                                                                                                                                                                                                                                                                                        |
| EPI_ISL_864308                                                                                                                                                                                                                                                                                                                                                                                                                                                                                                                                                                                                                                                                                                                                                                                                                                                                                                                                                                                                                                                                                                                                                                                                                                                                                                                                                                                                                                                                                                                                                                                                                                                                                                                                                                                                                                                                                                                                                                                                                                                                                                                                                                                                                                                                                                                                                                                                                                                                                                                                                                                                                                                                                                                                                                                                                                                                                 | EPI_ISL_864308                 | Lighthouse Lab in Alderley Park                                                                                                                                                                 | Wellcome Sanger Institute for the COVID-19 Genomics UK (COG-UK) Consortium | Jacquelyn Wynn, Mairead Hyland, The Lighthouse Lab in Alderley Park and Alex Alderton, Roberto Amato, Sonia Goncalves, Ewan Harrison, David K. Jackson, Ian Johnston, Dominic Kwiatkowski, Cordelia Langford, John Sillitoe on behalf of the Wellcome Sanger Institute COVID-19 Surveillance Team                                                                                                                                                                                                                                                                                                                                                                                        |
| EPI_ISL_864310, EPI_ISL_864312, EPI_ISL_864314, EPI_ISL_864315, EPI_ISL_864316, EPI_ISL_864318, EPI_ISL_864319, EPI_ISL_864320, EPI_ISL_864322, EPI_ISL_864323, EPI_ISL_864325, EPI_ISL_864326, EPI_ISL_864327, EPI_ISL_864329, EPI_ISL_864330, EPI_ISL_864331, EPI_ISL_864332, EPI_ISL_864333, EPI_ISL_864334, EPI_ISL_864335, EPI_ISL_864337, EPI_ISL_864338, EPI_ISL_864339, EPI_ISL_864340, EPI_ISL_864341, EPI_ISL_864342, EPI_ISL_864343, EPI_ISL_864344, EPI_ISL_864345, EPI_ISL_864346, EPI_ISL_864347, EPI_ISL_864349, EPI_ISL_864350, EPI_ISL_864351, EPI_ISL_864353, EPI_ISL_864355, EPI_ISL_864357, EPI_ISL_864358, EPI_ISL_864359, EPI_ISL_864360, EPI_ISL_864362, EPI_ISL_864363, EPI_ISL_864364, EPI_ISL_864366, EPI_ISL_864367, EPI_ISL_864369, EPI_ISL_864371, EPI_ISL_864372, EPI_ISL_864373, EPI_ISL_864374, EPI_ISL_864375, EPI_ISL_864376, EPI_ISL_864377, EPI_ISL_864378, EPI_ISL_864379, EPI_ISL_864380, EPI_ISL_864381, EPI_ISL_864382, EPI_ISL_864385, EPI_ISL_864386, EPI_ISL_864387, EPI_ISL_864388, EPI_ISL_864389, EPI_ISL_864391, EPI_ISL_864392, EPI_ISL_864393, EPI_ISL_864394, EPI_ISL_864395, EPI_ISL_864397, EPI_ISL_864398, EPI_ISL_864401, EPI_ISL_864404, EPI_ISL_864405, EPI_ISL_864406, EPI_ISL_864407, EPI_ISL_864408, EPI_ISL_864410, EPI_ISL_864412, EPI_ISL_864413, EPI_ISL_864415, EPI_ISL_864416, EPI_ISL_864417, EPI_ISL_864418, EPI_ISL_864420, EPI_ISL_864421, EPI_ISL_864423, EPI_ISL_864424, EPI_ISL_864425, EPI_ISL_864426, EPI_ISL_864427, EPI_ISL_864428, EPI_ISL_864429, EPI_ISL_864430, EPI_ISL_864431, EPI_ISL_864432, EPI_ISL_864433, EPI_ISL_864434, EPI_ISL_864435, EPI_ISL_864437, EPI_ISL_864438, EPI_ISL_864441, EPI_ISL_864442, EPI_ISL_864444, EPI_ISL_864446, EPI_ISL_864448, EPI_ISL_864449, EPI_ISL_864450, EPI_ISL_864451, EPI_ISL_864453, EPI_ISL_864454, EPI_ISL_864455, EPI_ISL_864456, EPI_ISL_864457, EPI_ISL_864458, EPI_ISL_864459, EPI_ISL_864460, EPI_ISL_864462, EPI_ISL_864463, EPI_ISL_864464, EPI_ISL_864466, EPI_ISL_864468, EPI_ISL_864470, EPI_ISL_864471, EPI_ISL_864473, EPI_ISL_864474, EPI_ISL_864476, EPI_ISL_864477, EPI_ISL_864479, EPI_ISL_864480, EPI_ISL_864481, EPI_ISL_864482, EPI_ISL_864486, EPI_ISL_864488, EPI_ISL_864489, EPI_ISL_864490, EPI_ISL_864491, EPI_ISL_864492, EPI_ISL_864494, EPI_ISL_864495, EPI_ISL_864496, EPI_ISL_864497, EPI_ISL_864498, EPI_ISL_864499, EPI_ISL_864500, EPI_ISL_864503, EPI_ISL_864504, EPI_ISL_864505, EPI_ISL_864506, EPI_ISL_864507, EPI_ISL_864508, EPI_ISL_864509, EPI_ISL_864510, EPI_ISL_864511, EPI_ISL_864512, EPI_ISL_864514, EPI_ISL_864515, EPI_ISL_864517, EPI_ISL_864518, EPI_ISL_864519, EPI_ISL_864521, EPI_ISL_864522, EPI_ISL_864523, EPI_ISL_864524, EPI_ISL_864525, EPI_ISL_864526, EPI_ISL_864530, EPI_ISL_864531, EPI_ISL_864532, EPI_ISL_864533, EPI_ISL_864535, EPI_ISL_864536, EPI_ISL_864537, EPI_ISL_864538, EPI_ISL_864541 | see above                      | Lighthouse Lab in Milton Keynes                                                                                                                                                                 | Wellcome Sanger Institute for the COVID-19 Genomics UK (COG-UK) Consortium | The Lighthouse Lab in Milton Keynes and Alex Alderton, Roberto Amato, Sonia Goncalves, Ewan Harrison, David K. Jackson, Ian Johnston, Dominic Kwiatkowski, Cordelia Langford, John Sillitoe on behalf of the Wellcome Sanger Institute COVID-19 Surveillance Team                                                                                                                                                                                                                                                                                                                                                                                                                        |
| EPI_ISL_864896, EPI_ISL_864897, EPI_ISL_864898, EPI_ISL_864899, EPI_ISL_864900, EPI_ISL_864901, EPI_ISL_864902, EPI_ISL_864903, EPI_ISL_864904, EPI_ISL_864905, EPI_ISL_864906, EPI_ISL_864907, EPI_ISL_864908, EPI_ISL_864909, EPI_ISL_864910, EPI_ISL_864911, EPI_ISL_864912, EPI_ISL_864913, EPI_ISL_864915, EPI_ISL_864916, EPI_ISL_864919, EPI_ISL_864920, EPI_ISL_864921, EPI_ISL_864922, EPI_ISL_864923, EPI_ISL_864924, EPI_ISL_864926, EPI_ISL_864935, EPI_ISL_864936, EPI_ISL_864937, EPI_ISL_864938, EPI_ISL_864941, EPI_ISL_864942, EPI_ISL_864944                                                                                                                                                                                                                                                                                                                                                                                                                                                                                                                                                                                                                                                                                                                                                                                                                                                                                                                                                                                                                                                                                                                                                                                                                                                                                                                                                                                                                                                                                                                                                                                                                                                                                                                                                                                                                                                                                                                                                                                                                                                                                                                                                                                                                                                                                                                                 | see above                      | Department of Pathology, University of Cambridge                                                                                                                                                | COVID-19 Genomics UK (COG-UK) Consortium                                   | Aminu S. Jahun, Yasmin Chaudhry, Grant Hall, Iliana Georgana, Myra Hosmillo, Martin D. Curran, Malte Pinkert, Surendra Parmar, Ian Goodfellow                                                                                                                                                                                                                                                                                                                                                                                                                                                                                                                                            |
| EPI_ISL_865019, EPI_ISL_865021, EPI_ISL_865022, EPI_ISL_865023, EPI_ISL_865024, EPI_ISL_865025, EPI_ISL_865026, EPI_ISL_865027, EPI_ISL_865028, EPI_ISL_865029, EPI_ISL_865030, EPI_ISL_865031, EPI_ISL_865032, EPI_ISL_865033, EPI_ISL_865034, EPI_ISL_865035, EPI_ISL_865036, EPI_ISL_865037, EPI_ISL_865038, EPI_ISL_865039, EPI_ISL_865040, EPI_ISL_865041, EPI_ISL_865042, EPI_ISL_865043, EPI_ISL_865044, EPI_ISL_865045, EPI_ISL_865046, EPI_ISL_865047, EPI_ISL_865048, EPI_ISL_865049, EPI_ISL_865050, EPI_ISL_865051, EPI_ISL_865052, EPI_ISL_865053, EPI_ISL_865054, EPI_ISL_865055, EPI_ISL_865056, EPI_ISL_865057, EPI_ISL_865058, EPI_ISL_865059, EPI_ISL_865060, EPI_ISL_865061, EPI_ISL_865062, EPI_ISL_865063, EPI_ISL_865064, EPI_ISL_865065                                                                                                                                                                                                                                                                                                                                                                                                                                                                                                                                                                                                                                                                                                                                                                                                                                                                                                                                                                                                                                                                                                                                                                                                                                                                                                                                                                                                                                                                                                                                                                                                                                                                                                                                                                                                                                                                                                                                                                                                                                                                                                                                 | see above                      | West of Scotland Specialist Virology Centre, NHSGCC / MRC-University of Glasgow Centre for Virus Research                                                                                       | COVID-19 Genomics UK (COG-UK) Consortium                                   | Ana da Silva Filipe, Natasha Johnson, Kathy Smollett, Daniel Mair, Stephen Carmichael, Alice Broos, Lily Tong, Jenna Nichols, Kyriaki Nomikou; Sarah McDonald; Richard Orton, Joseph Hughes, Sreenu Vattipally, David L Robertson; Alasdair MacLean, Rory Gunson; Sharif Shaaban, Matthew Holden; Rachel Blacow, Guy Mollett, Kathy Li, James Shepherd, Antonia Ho, Emma Thomson                                                                                                                                                                                                                                                                                                         |
| EPI_ISL_865068                                                                                                                                                                                                                                                                                                                                                                                                                                                                                                                                                                                                                                                                                                                                                                                                                                                                                                                                                                                                                                                                                                                                                                                                                                                                                                                                                                                                                                                                                                                                                                                                                                                                                                                                                                                                                                                                                                                                                                                                                                                                                                                                                                                                                                                                                                                                                                                                                                                                                                                                                                                                                                                                                                                                                                                                                                                                                 | EPI_ISL_865068                 | Lighthouse Lab in Glasgow / MRC-University of Glasgow Centre for Virus Research                                                                                                                 | COVID-19 Genomics UK (COG-UK) Consortium                                   | Ana da Silva Filipe, Natasha Johnson, Kathy Smollett, Daniel Mair, Stephen Carmichael, Alice Broos, Lily Tong, Jenna Nichols, Kyriaki Nomikou; Sarah McDonald; Harper VanSteenhouse, Yumi Kasai, David Gray, Carol Clugston, Anna Dominiczak, Alasdair MacLean, Rory Gunson; Richard Orton, Joseph Hughes, Sreenu Vattipally, David L Robertson; Sharif Shaaban, Matthew Holden; Kathy Li, James Shepherd, Antonia Ho, Emma Thomson                                                                                                                                                                                                                                                      |
| EPI_ISL_865092, EPI_ISL_865093, EPI_ISL_865105, EPI_ISL_865106, EPI_ISL_865107, EPI_ISL_865108, EPI_ISL_865109, EPI_ISL_865110, EPI_ISL_865111, EPI_ISL_865112, EPI_ISL_865113, EPI_ISL_865114, EPI_ISL_865116, EPI_ISL_865118, EPI_ISL_865119, EPI_ISL_865120, EPI_ISL_865121, EPI_ISL_865122, EPI_ISL_865123, EPI_ISL_865124, EPI_ISL_865125, EPI_ISL_865126, EPI_ISL_865127, EPI_ISL_865128, EPI_ISL_865129, EPI_ISL_865130, EPI_ISL_865132, EPI_ISL_865133, EPI_ISL_865134, EPI_ISL_865135, EPI_ISL_865136, EPI_ISL_865138, EPI_ISL_865139, EPI_ISL_865140, EPI_ISL_865145                                                                                                                                                                                                                                                                                                                                                                                                                                                                                                                                                                                                                                                                                                                                                                                                                                                                                                                                                                                                                                                                                                                                                                                                                                                                                                                                                                                                                                                                                                                                                                                                                                                                                                                                                                                                                                                                                                                                                                                                                                                                                                                                                                                                                                                                                                                 | see above                      | Virology Department, Royal Infirmary of Edinburgh, NHS Lothian / School of Biological Sciences, University of Edinburgh / Institute of Genetics and Molecular Medicine, University of Edinburgh | COVID-19 Genomics UK (COG-UK) Consortium                                   | McHugh M, Dewar R, Rooke S, Gallagher M, Balcaza C, O'Toole A, Scher E, Hill V, McCrone JT, Colquhoun R, Yu X, Jackson B, Rambaut A, Williams TC, Templeton K                                                                                                                                                                                                                                                                                                                                                                                                                                                                                                                            |
| EPI_ISL_865272, EPI_ISL_865273, EPI_ISL_865274, EPI_ISL_865275, EPI_ISL_865276, EPI_ISL_865277, EPI_ISL_865280, EPI_ISL_865281, EPI_ISL_865282, EPI_ISL_865284, EPI_ISL_865285, EPI_ISL_865286, EPI_ISL_865287, EPI_ISL_865288, EPI_ISL_865289, EPI_ISL_865290, EPI_ISL_865291, EPI_ISL_865292, EPI_ISL_865293, EPI_ISL_865294, EPI_ISL_865295, EPI_ISL_865296, EPI_ISL_865297, EPI_ISL_865298, EPI_ISL_865300, EPI_ISL_865301, EPI_ISL_865302, EPI_ISL_865303, EPI_ISL_865304, EPI_ISL_865305, EPI_ISL_865306, EPI_ISL_865307, EPI_ISL_865308, EPI_ISL_865309, EPI_ISL_865310, EPI_ISL_865311, EPI_ISL_865312, EPI_ISL_865313, EPI_ISL_865314, EPI_ISL_865315, EPI_ISL_865317, EPI_ISL_865318, EPI_ISL_865319, EPI_ISL_865320, EPI_ISL_865321, EPI_ISL_865322, EPI_ISL_865323, EPI_ISL_865324, EPI_ISL_865325, EPI_ISL_865326, EPI_ISL_865327, EPI_ISL_865328, EPI_ISL_865341, EPI_ISL_865342, EPI_ISL_865343, EPI_ISL_865344, EPI_ISL_865345, EPI_ISL_865346, EPI_ISL_865347, EPI_ISL_865348, EPI_ISL_865349, EPI_ISL_865350, EPI_ISL_865351, EPI_ISL_865353, EPI_ISL_865449                                                                                                                                                                                                                                                                                                                                                                                                                                                                                                                                                                                                                                                                                                                                                                                                                                                                                                                                                                                                                                                                                                                                                                                                                                                                                                                                                                                                                                                                                                                                                                                                                                                                                                                                                                                                                 | see above                      | Liverpool Clinical Laboratories                                                                                                                                                                 | COVID-19 Genomics UK (COG-UK) Consortium                                   | Sam Haldenby, Anita Lucaci, Steve Paterson, Julian Hiscox, Alistair Darby, M Almsaud, A Alrezaihi, Muhannad Alruwaili, Stuart D Armstrong, Jones Benjamin, Eleanor G Bentley, Anu Chawla, Jordan J Clark, Angela Cowell, Richard Eccles, Isabel Garcia-Dorival, Matthew Gemmell, Alessandro Gerada, PKF Gilmore, Richard Gregory, Ximeng Han, Catherine Hartley, Margaret Hughes, Miren Iturriza-Gomara, James Johnson, L Luu, Jenifer Manson, Charlotte Nelson, Elaine O'Toole, Cassie Olateju, Rebekah Penrice-Randal , Lucille Rainbow, N.P Randle, Trevor Ian Robinson, Parul Sharma, Ghada T Shawli, James P Stewart, Neil Swainston, Ecaterina Vamos, Joanne Watts, Mark Whitehead |
| EPI_ISL_865487, EPI_ISL_865587, EPI_ISL_865590, EPI_ISL_865592, EPI_ISL_865847, EPI_ISL_865852, EPI_ISL_865880, EPI_ISL_865891, EPI_ISL_865905, EPI_ISL_865906, EPI_ISL_865910, EPI_ISL_865913, EPI_ISL_865914, EPI_ISL_865915                                                                                                                                                                                                                                                                                                                                                                                                                                                                                                                                                                                                                                                                                                                                                                                                                                                                                                                                                                                                                                                                                                                                                                                                                                                                                                                                                                                                                                                                                                                                                                                                                                                                                                                                                                                                                                                                                                                                                                                                                                                                                                                                                                                                                                                                                                                                                                                                                                                                                                                                                                                                                                                                 | see above                      | University College London, Great Ormond Street Hospital for Children NHS Foundation Trust, Imperial College Healthcare NHS Trust                                                                | COVID-19 Genomics UK (COG-UK) Consortium                                   | Sergi Castellano, Rachel Williams, Mark Kristiansen, Paola Resende Silva, Sunando Roy, Tony Brooks, Helena Tutill, Paola Niola, Patricia Dyal, Charlotte Williams, Leysa Forrest, Yasmin Panchbhaya, Jacqueline Findlay, Samuel Weeks, Julianne Brown, Kathryn Harris, Paul Randell, James Price, Alison Holmes, Judith Breuer                                                                                                                                                                                                                                                                                                                                                           |
| EPI_ISL_866082, EPI_ISL_866083, EPI_ISL_866085, EPI_ISL_866086, EPI_ISL_866087, EPI_ISL_866088, EPI_ISL_866089, EPI_ISL_866090, EPI_ISL_866091, EPI_ISL_866092, EPI_ISL_866093, EPI_ISL_866094, EPI_ISL_866095, EPI_ISL_866096, EPI_ISL_866097, EPI_ISL_866098, EPI_ISL_866099, EPI_ISL_866100, EPI_ISL_866101, EPI_ISL_866102, EPI_ISL_866103, EPI_ISL_866104, EPI_ISL_866105, EPI_ISL_866112, EPI_ISL_866113, EPI_ISL_866114, EPI_ISL_866117, EPI_ISL_866120, EPI_ISL_866125, EPI_ISL_866126, EPI_ISL_866134, EPI_ISL_866142, EPI_ISL_866143, EPI_ISL_866146, EPI_ISL_866150, EPI_ISL_866152, EPI_ISL_866153, EPI_ISL_866154, EPI_ISL_866155, EPI_ISL_866156, EPI_ISL_866158, EPI_ISL_866159, EPI_ISL_866160, EPI_ISL_866161, EPI_ISL_866163, EPI_ISL_866165, EPI_ISL_866166, EPI_ISL_866167, EPI_ISL_866169, EPI_ISL_866171, EPI_ISL_866173, EPI_ISL_866174, EPI_ISL_866175, EPI_ISL_866176, EPI_ISL_866177, EPI_ISL_866178, EPI_ISL_866181, EPI_ISL_866182, EPI_ISL_866185, EPI_ISL_866186                                                                                                                                                                                                                                                                                                                                                                                                                                                                                                                                                                                                                                                                                                                                                                                                                                                                                                                                                                                                                                                                                                                                                                                                                                                                                                                                                                                                                                                                                                                                                                                                                                                                                                                                                                                                                                                                                                 | see above                      | University College London Hospital                                                                                                                                                              | COVID-19 Genomics UK (COG-UK) Consortium                                   | Judith Heaney, Matthew Byott, Catherine Houlihan, Dan Frampton, Stuart Kirk, Moira Spyer and Eleni Nastouli                                                                                                                                                                                                                                                                                                                                                                                                                                                                                                                                                                              |
| EPI_ISL_866194, EPI_ISL_866195, EPI_ISL_866196, EPI_ISL_866197, EPI_ISL_866198, EPI_ISL_866199, EPI_ISL_866200, EPI_ISL_866201, EPI_ISL_866202, EPI_ISL_866203, EPI_ISL_866204, EPI_ISL_866205, EPI_ISL_866206, EPI_ISL_866207, EPI_ISL_866208, EPI_ISL_866209, EPI_ISL_866210, EPI_ISL_866211, EPI_ISL_866212, EPI_ISL_866213, EPI_ISL_866214, EPI_ISL_866215, EPI_ISL_866216, EPI_ISL_866217, EPI_ISL_866218, EPI_ISL_866219, EPI_ISL_866220, EPI_ISL_866221, EPI_ISL_866222, EPI_ISL_866223, EPI_ISL_866224, EPI_ISL_866225, EPI_ISL_866226, EPI_ISL_866227, EPI_ISL_866228, EPI_ISL_866229, EPI_ISL_866230, EPI_ISL_866231, EPI_ISL_866232, EPI_ISL_866233, EPI_ISL_866234, EPI_ISL_866235, EPI_ISL_866236, EPI_ISL_866237, EPI_ISL_866238, EPI_ISL_866239, EPI_ISL_866240, EPI_ISL_866241, EPI_ISL_866242, EPI_ISL_866243, EPI_ISL_866244, EPI_ISL_866245, EPI_ISL_866246, EPI_ISL_866247, EPI_ISL_866248, EPI_ISL_866249, EPI_ISL_866250, EPI_ISL_866251, EPI_ISL_866252, EPI_ISL_866253, EPI_ISL_866254, EPI_ISL_866255, EPI_ISL_866256, EPI_ISL_866257, EPI_ISL_866258, EPI_ISL_866259, EPI_ISL_866260, EPI_ISL_866261, EPI_ISL_866262, EPI_ISL_866267, EPI_ISL_866268, EPI_ISL_866269, EPI_ISL_866271, EPI_ISL_866272, EPI_ISL_866274, EPI_ISL_866275, EPI_ISL_866287                                                                                                                                                                                                                                                                                                                                                                                                                                                                                                                                                                                                                                                                                                                                                                                                                                                                                                                                                                                                                                                                                                                                                                                                                                                                                                                                                                                                                                                                                                                                                                                                                 | see above                      | University College London, Great Ormond Street Hospital for Children NHS Foundation Trust, Imperial College Healthcare NHS Trust                                                                | COVID-19 Genomics UK (COG-UK) Consortium                                   | Sergi Castellano, Rachel Williams, Mark Kristiansen, Paola Resende Silva, Sunando Roy, Tony Brooks, Helena Tutill, Paola Niola, Patricia Dyal, Charlotte Williams, Leysa Forrest, Yasmin Panchbhaya, Jacqueline Findlay, Samuel Weeks, Julianne Brown, Kathryn Harris, Paul Randell, James Price, Alison Holmes, Judith Breuer                                                                                                                                                                                                                                                                                                                                                           |
| EPI_ISL_866393, EPI_ISL_866394                                                                                                                                                                                                                                                                                                                                                                                                                                                                                                                                                                                                                                                                                                                                                                                                                                                                                                                                                                                                                                                                                                                                                                                                                                                                                                                                                                                                                                                                                                                                                                                                                                                                                                                                                                                                                                                                                                                                                                                                                                                                                                                                                                                                                                                                                                                                                                                                                                                                                                                                                                                                                                                                                                                                                                                                                                                                 | EPI_ISL_866393, EPI_ISL_866394 | Regional Virus Laboratory, Belfast Health and Social Care Trust                                                                                                                                 | COVID-19 Genomics UK (COG-UK) Consortium                                   | Conall McCaughey, James McKenna, Tanya Curran, Susan Feeoney, Alison Watt, Ciara Cox, Mairead Connor, Zoltan Molnar, David Simpson, Derek Fairley                                                                                                                                                                                                                                                                                                                                                                                                                                                                                                                                        |



[illegible]

[illegible]

[illegible]

[illegible]

[illegible]

[illegible]

|                                                                                                                                                                                                                                                                                                                                                                                                                                                                                                                                                                                                                                                                                                                                                                                                                                                                                                                                                                                                                                                                                                                                                                                                                                                          |                                |                                 |                                                                            |                                                                                                                                                                                                                                                                                                             |
|----------------------------------------------------------------------------------------------------------------------------------------------------------------------------------------------------------------------------------------------------------------------------------------------------------------------------------------------------------------------------------------------------------------------------------------------------------------------------------------------------------------------------------------------------------------------------------------------------------------------------------------------------------------------------------------------------------------------------------------------------------------------------------------------------------------------------------------------------------------------------------------------------------------------------------------------------------------------------------------------------------------------------------------------------------------------------------------------------------------------------------------------------------------------------------------------------------------------------------------------------------|--------------------------------|---------------------------------|----------------------------------------------------------------------------|-------------------------------------------------------------------------------------------------------------------------------------------------------------------------------------------------------------------------------------------------------------------------------------------------------------|
| EPI_ISL_874929, EPI_ISL_874931,<br>EPI_ISL_874932, EPI_ISL_874933                                                                                                                                                                                                                                                                                                                                                                                                                                                                                                                                                                                                                                                                                                                                                                                                                                                                                                                                                                                                                                                                                                                                                                                        | EPI_ISL_874935                 | Lighthouse Lab in Glasgow       | Wellcome Sanger Institute for the COVID-19 Genomics UK (COG-UK) Consortium | Harper VanSteenhouse, Yumi Kasai, David Gray, Carol Clugston, Anna Dominiczak and Alex Alderton, Roberto Amato, Sonia Goncalves, Ewan Harrison, David K. Jackson, Ian Johnston, Dominic Kwiatkowski, Cordelia Langford, John Sillitoe on behalf of the Wellcome Sanger Institute COVID-19 Surveillance Team |
| EPI_ISL_874936, EPI_ISL_874937, EPI_ISL_874938, EPI_ISL_874939, EPI_ISL_874940, EPI_ISL_874941, EPI_ISL_874942, EPI_ISL_874962, EPI_ISL_874963, EPI_ISL_874964, EPI_ISL_874966, EPI_ISL_874968, EPI_ISL_874969, EPI_ISL_874970, EPI_ISL_874972, EPI_ISL_874973, EPI_ISL_874974, EPI_ISL_874975, EPI_ISL_874976, EPI_ISL_874978, EPI_ISL_874979, EPI_ISL_874980, EPI_ISL_874981, EPI_ISL_874983, EPI_ISL_874984, EPI_ISL_874985, EPI_ISL_874987, EPI_ISL_874988, EPI_ISL_874989, EPI_ISL_877913, EPI_ISL_877955, EPI_ISL_878126                                                                                                                                                                                                                                                                                                                                                                                                                                                                                                                                                                                                                                                                                                                           | see above                      | Lighthouse Lab in Alderley Park | Wellcome Sanger Institute for the COVID-19 Genomics UK (COG-UK) Consortium | Jacquelyn Wynn, Mairead Hyland, The Lighthouse Lab in Alderley Park and Alex Alderton, Roberto Amato, Sonia Goncalves, Ewan Harrison, David K. Jackson, Ian Johnston, Dominic Kwiatkowski, Cordelia Langford, John Sillitoe on behalf of the Wellcome Sanger Institute COVID-19 Surveillance Team           |
| EPI_ISL_878769, EPI_ISL_878792, EPI_ISL_878833, EPI_ISL_878842                                                                                                                                                                                                                                                                                                                                                                                                                                                                                                                                                                                                                                                                                                                                                                                                                                                                                                                                                                                                                                                                                                                                                                                           | EPI_ISL_878844                 | Lighthouse Lab in Milton Keynes | Wellcome Sanger Institute for the COVID-19 Genomics UK (COG-UK) Consortium | The Lighthouse Lab in Milton Keynes and Alex Alderton, Roberto Amato, Sonia Goncalves, Ewan Harrison, David K. Jackson, Ian Johnston, Dominic Kwiatkowski, Cordelia Langford, John Sillitoe on behalf of the Wellcome Sanger Institute COVID-19 Surveillance Team                                           |
| EPI_ISL_878860, EPI_ISL_878884, EPI_ISL_878906, EPI_ISL_878934, EPI_ISL_878943, EPI_ISL_878971, EPI_ISL_878982, EPI_ISL_878990, EPI_ISL_879014, EPI_ISL_879023, EPI_ISL_879037, EPI_ISL_879043, EPI_ISL_879049, EPI_ISL_879050, EPI_ISL_879052, EPI_ISL_879064, EPI_ISL_879089                                                                                                                                                                                                                                                                                                                                                                                                                                                                                                                                                                                                                                                                                                                                                                                                                                                                                                                                                                           | see above                      | Lighthouse Lab in Alderley Park | Wellcome Sanger Institute for the COVID-19 Genomics UK (COG-UK) Consortium | Jacquelyn Wynn, Mairead Hyland, The Lighthouse Lab in Alderley Park and Alex Alderton, Roberto Amato, Sonia Goncalves, Ewan Harrison, David K. Jackson, Ian Johnston, Dominic Kwiatkowski, Cordelia Langford, John Sillitoe on behalf of the Wellcome Sanger Institute COVID-19 Surveillance Team           |
| EPI_ISL_879379, EPI_ISL_879380, EPI_ISL_879396, EPI_ISL_879397, EPI_ISL_879404, EPI_ISL_879409, EPI_ISL_879412, EPI_ISL_879413, EPI_ISL_879424, EPI_ISL_879426, EPI_ISL_879429, EPI_ISL_879442, EPI_ISL_879448, EPI_ISL_879449, EPI_ISL_879450, EPI_ISL_879457, EPI_ISL_879458, EPI_ISL_879459, EPI_ISL_879467, EPI_ISL_879471, EPI_ISL_879477, EPI_ISL_879492, EPI_ISL_879496, EPI_ISL_879502, EPI_ISL_879526, EPI_ISL_879532, EPI_ISL_879538, EPI_ISL_879540, EPI_ISL_879548, EPI_ISL_879552, EPI_ISL_879553, EPI_ISL_879560, EPI_ISL_879566, EPI_ISL_879571, EPI_ISL_879572, EPI_ISL_879576, EPI_ISL_879581, EPI_ISL_879585, EPI_ISL_879586, EPI_ISL_879591, EPI_ISL_879594, EPI_ISL_879597, EPI_ISL_879600, EPI_ISL_879601, EPI_ISL_879608, EPI_ISL_879611, EPI_ISL_879618, EPI_ISL_879621, EPI_ISL_879642, EPI_ISL_879653, EPI_ISL_879654, EPI_ISL_879656, EPI_ISL_879663, EPI_ISL_879664, EPI_ISL_879675, EPI_ISL_879678, EPI_ISL_879679, EPI_ISL_879681, EPI_ISL_879686, EPI_ISL_879689, EPI_ISL_879707, EPI_ISL_879710, EPI_ISL_879711, EPI_ISL_879713, EPI_ISL_879717                                                                                                                                                                           | see above                      | Lighthouse Lab in Alderley Park | Wellcome Sanger Institute for the COVID-19 Genomics UK (COG-UK) Consortium | Jacquelyn Wynn, Mairead Hyland, The Lighthouse Lab in Alderley Park and Alex Alderton, Roberto Amato, Sonia Goncalves, Ewan Harrison, David K. Jackson, Ian Johnston, Dominic Kwiatkowski, Cordelia Langford, John Sillitoe on behalf of the Wellcome Sanger Institute COVID-19 Surveillance Team           |
| EPI_ISL_879737, EPI_ISL_879750, EPI_ISL_879761                                                                                                                                                                                                                                                                                                                                                                                                                                                                                                                                                                                                                                                                                                                                                                                                                                                                                                                                                                                                                                                                                                                                                                                                           | EPI_ISL_879763, EPI_ISL_879776 | Lighthouse Lab in Alderley Park | Wellcome Sanger Institute for the COVID-19 Genomics UK (COG-UK) Consortium | Jacquelyn Wynn, Mairead Hyland, The Lighthouse Lab in Alderley Park and Alex Alderton, Roberto Amato, Sonia Goncalves, Ewan Harrison, David K. Jackson, Ian Johnston, Dominic Kwiatkowski, Cordelia Langford, John Sillitoe on behalf of the Wellcome Sanger Institute COVID-19 Surveillance Team           |
| EPI_ISL_879787, EPI_ISL_879794, EPI_ISL_879800, EPI_ISL_879810                                                                                                                                                                                                                                                                                                                                                                                                                                                                                                                                                                                                                                                                                                                                                                                                                                                                                                                                                                                                                                                                                                                                                                                           | EPI_ISL_879820                 | Lighthouse Lab in Cambridge     | Wellcome Sanger Institute for the COVID-19 Genomics UK (COG-UK) Consortium | Rob Howes, The Lighthouse Lab in Cambridge and Alex Alderton, Roberto Amato, Sonia Goncalves, Ewan Harrison, David K. Jackson, Ian Johnston, Dominic Kwiatkowski, Cordelia Langford, John Sillitoe on behalf of the Wellcome Sanger Institute COVID-19 Surveillance Team                                    |
| EPI_ISL_879826                                                                                                                                                                                                                                                                                                                                                                                                                                                                                                                                                                                                                                                                                                                                                                                                                                                                                                                                                                                                                                                                                                                                                                                                                                           | EPI_ISL_879862                 | Lighthouse Lab in Alderley Park | Wellcome Sanger Institute for the COVID-19 Genomics UK (COG-UK) Consortium | Jacquelyn Wynn, Mairead Hyland, The Lighthouse Lab in Alderley Park and Alex Alderton, Roberto Amato, Sonia Goncalves, Ewan Harrison, David K. Jackson, Ian Johnston, Dominic Kwiatkowski, Cordelia Langford, John Sillitoe on behalf of the Wellcome Sanger Institute COVID-19 Surveillance Team           |
| EPI_ISL_879894, EPI_ISL_879915, EPI_ISL_879933, EPI_ISL_879955, EPI_ISL_879974, EPI_ISL_879978, EPI_ISL_879986, EPI_ISL_879991, EPI_ISL_880023                                                                                                                                                                                                                                                                                                                                                                                                                                                                                                                                                                                                                                                                                                                                                                                                                                                                                                                                                                                                                                                                                                           | EPI_ISL_880035, EPI_ISL_880038 | Lighthouse Lab in Cambridge     | Wellcome Sanger Institute for the COVID-19 Genomics UK (COG-UK) Consortium | Rob Howes, The Lighthouse Lab in Cambridge and Alex Alderton, Roberto Amato, Sonia Goncalves, Ewan Harrison, David K. Jackson, Ian Johnston, Dominic Kwiatkowski, Cordelia Langford, John Sillitoe on behalf of the Wellcome Sanger Institute COVID-19 Surveillance Team                                    |
| EPI_ISL_880043                                                                                                                                                                                                                                                                                                                                                                                                                                                                                                                                                                                                                                                                                                                                                                                                                                                                                                                                                                                                                                                                                                                                                                                                                                           | EPI_ISL_880054                 | Lighthouse Lab in Alderley Park | Wellcome Sanger Institute for the COVID-19 Genomics UK (COG-UK) Consortium | Jacquelyn Wynn, Mairead Hyland, The Lighthouse Lab in Alderley Park and Alex Alderton, Roberto Amato, Sonia Goncalves, Ewan Harrison, David K. Jackson, Ian Johnston, Dominic Kwiatkowski, Cordelia Langford, John Sillitoe on behalf of the Wellcome Sanger Institute COVID-19 Surveillance Team           |
| EPI_ISL_880055, EPI_ISL_880062                                                                                                                                                                                                                                                                                                                                                                                                                                                                                                                                                                                                                                                                                                                                                                                                                                                                                                                                                                                                                                                                                                                                                                                                                           |                                | Lighthouse Lab in Cambridge     | Wellcome Sanger Institute for the COVID-19 Genomics UK (COG-UK) Consortium | Rob Howes, The Lighthouse Lab in Cambridge and Alex Alderton, Roberto Amato, Sonia Goncalves, Ewan Harrison, David K. Jackson, Ian Johnston, Dominic Kwiatkowski, Cordelia Langford, John Sillitoe on behalf of the Wellcome Sanger Institute COVID-19 Surveillance Team                                    |
| EPI_ISL_880584, EPI_ISL_880585, EPI_ISL_880586, EPI_ISL_880587, EPI_ISL_880588, EPI_ISL_880589, EPI_ISL_880590, EPI_ISL_880591, EPI_ISL_880592, EPI_ISL_880593, EPI_ISL_880594, EPI_ISL_880595, EPI_ISL_880596, EPI_ISL_880597, EPI_ISL_880598, EPI_ISL_880599, EPI_ISL_880600, EPI_ISL_880601, EPI_ISL_880602, EPI_ISL_880603, EPI_ISL_880604, EPI_ISL_880605, EPI_ISL_880606, EPI_ISL_880607, EPI_ISL_880608, EPI_ISL_880609, EPI_ISL_880610, EPI_ISL_880611, EPI_ISL_880612, EPI_ISL_880613, EPI_ISL_880614, EPI_ISL_880615, EPI_ISL_880616, EPI_ISL_880617, EPI_ISL_880618, EPI_ISL_880619, EPI_ISL_880620, EPI_ISL_880621, EPI_ISL_880622, EPI_ISL_880623, EPI_ISL_880624, EPI_ISL_880625, EPI_ISL_880626, EPI_ISL_880627, EPI_ISL_880628, EPI_ISL_880629, EPI_ISL_880630, EPI_ISL_880631, EPI_ISL_880632, EPI_ISL_880633, EPI_ISL_880634, EPI_ISL_880635, EPI_ISL_880636, EPI_ISL_880637, EPI_ISL_880638, EPI_ISL_880639, EPI_ISL_880640, EPI_ISL_880641, EPI_ISL_880642, EPI_ISL_880643, EPI_ISL_880644, EPI_ISL_880645, EPI_ISL_880646, EPI_ISL_880647, EPI_ISL_880648, EPI_ISL_880649, EPI_ISL_880650, EPI_ISL_880651, EPI_ISL_880652, EPI_ISL_880653, EPI_ISL_880654, EPI_ISL_880655, EPI_ISL_880656, EPI_ISL_880657, EPI_ISL_880658, EPI_ISL_ |                                |                                 |                                                                            |                                                                                                                                                                                                                                                                                                             |

|                                                                                                                                                                                                                                                                                                                                                                                                                                                                                                                                                                                                                                                                                                                                                                                                                                                                                                                                                                                                                                                                                                                                                                                                                                                                                                                                                                                                                                                                                                                                                                                                                                                                                                                                                                                                                                                                                                                                                                                                                                                                                                                                                                                                                                                                                                                                                                                                                                                                                                                                                                                                                                                                                                                                                                                                                                                                |                |                                 |                                                                            |                                                                                                                                                                                                                                                                                                   |
|----------------------------------------------------------------------------------------------------------------------------------------------------------------------------------------------------------------------------------------------------------------------------------------------------------------------------------------------------------------------------------------------------------------------------------------------------------------------------------------------------------------------------------------------------------------------------------------------------------------------------------------------------------------------------------------------------------------------------------------------------------------------------------------------------------------------------------------------------------------------------------------------------------------------------------------------------------------------------------------------------------------------------------------------------------------------------------------------------------------------------------------------------------------------------------------------------------------------------------------------------------------------------------------------------------------------------------------------------------------------------------------------------------------------------------------------------------------------------------------------------------------------------------------------------------------------------------------------------------------------------------------------------------------------------------------------------------------------------------------------------------------------------------------------------------------------------------------------------------------------------------------------------------------------------------------------------------------------------------------------------------------------------------------------------------------------------------------------------------------------------------------------------------------------------------------------------------------------------------------------------------------------------------------------------------------------------------------------------------------------------------------------------------------------------------------------------------------------------------------------------------------------------------------------------------------------------------------------------------------------------------------------------------------------------------------------------------------------------------------------------------------------------------------------------------------------------------------------------------------|----------------|---------------------------------|----------------------------------------------------------------------------|---------------------------------------------------------------------------------------------------------------------------------------------------------------------------------------------------------------------------------------------------------------------------------------------------|
| EPI_ISL_881328, EPI_ISL_881340, EPI_ISL_881341, EPI_ISL_881342, EPI_ISL_881343, EPI_ISL_881344, EPI_ISL_881346, EPI_ISL_881347, EPI_ISL_881348, EPI_ISL_881349, EPI_ISL_881350, EPI_ISL_881351, EPI_ISL_881352, EPI_ISL_881353, EPI_ISL_881355, EPI_ISL_881357, EPI_ISL_881359, EPI_ISL_881360, EPI_ISL_881361, EPI_ISL_881362, EPI_ISL_881366, EPI_ISL_881369, EPI_ISL_881371, EPI_ISL_881372, EPI_ISL_881373, EPI_ISL_881374, EPI_ISL_881375, EPI_ISL_881377, EPI_ISL_881378, EPI_ISL_881380, EPI_ISL_881381, EPI_ISL_881382, EPI_ISL_881383, EPI_ISL_881384, EPI_ISL_881385, EPI_ISL_881386, EPI_ISL_881387, EPI_ISL_881388, EPI_ISL_881389, EPI_ISL_881390, EPI_ISL_881391, EPI_ISL_881392, EPI_ISL_881393, EPI_ISL_881394, EPI_ISL_881395, EPI_ISL_881396, EPI_ISL_881397, EPI_ISL_881398, EPI_ISL_881399, EPI_ISL_881400, EPI_ISL_881401, EPI_ISL_881402, EPI_ISL_881403, EPI_ISL_881410, EPI_ISL_881411, EPI_ISL_881412, EPI_ISL_881414, EPI_ISL_881417, EPI_ISL_881418, EPI_ISL_881419, EPI_ISL_881421, EPI_ISL_881423, EPI_ISL_881425, EPI_ISL_881426, EPI_ISL_881429, EPI_ISL_881430, EPI_ISL_881432, EPI_ISL_881434, EPI_ISL_881435, EPI_ISL_881436, EPI_ISL_881437, EPI_ISL_881439, EPI_ISL_881442, EPI_ISL_881444, EPI_ISL_881451, EPI_ISL_881452, EPI_ISL_881453, EPI_ISL_881455, EPI_ISL_881456, EPI_ISL_881458, EPI_ISL_881461, EPI_ISL_881465, EPI_ISL_881466, EPI_ISL_881473, EPI_ISL_881474, EPI_ISL_881475, EPI_ISL_881477, EPI_ISL_881480, EPI_ISL_881481, EPI_ISL_881482, EPI_ISL_881485, EPI_ISL_881486, EPI_ISL_881487, EPI_ISL_881488, EPI_ISL_881491, EPI_ISL_881492, EPI_ISL_881494, EPI_ISL_881495, EPI_ISL_881496, EPI_ISL_881497, EPI_ISL_881498, EPI_ISL_881501, EPI_ISL_881505, EPI_ISL_881507, EPI_ISL_881508, EPI_ISL_881509, EPI_ISL_881510, EPI_ISL_881511, EPI_ISL_881513, EPI_ISL_881517, EPI_ISL_881518, EPI_ISL_881521, EPI_ISL_881522, EPI_ISL_881525, EPI_ISL_881528, EPI_ISL_881530, EPI_ISL_881531, EPI_ISL_881533, EPI_ISL_881535, EPI_ISL_881536, EPI_ISL_881539, EPI_ISL_881541, EPI_ISL_881542, EPI_ISL_881543, EPI_ISL_881544, EPI_ISL_881546, EPI_ISL_881548, EPI_ISL_881550, EPI_ISL_881554, EPI_ISL_881557, EPI_ISL_881558, EPI_ISL_881559, EPI_ISL_881560, EPI_ISL_881564, EPI_ISL_881565, EPI_ISL_881567, EPI_ISL_881569, EPI_ISL_881570, EPI_ISL_881571, EPI_ISL_881572, EPI_ISL_881574, EPI_ISL_881575, EPI_ISL_881576, EPI_ISL_881577, EPI_ISL_881578, EPI_ISL_881579, EPI_ISL_881580, EPI_ISL_881581, EPI_ISL_881582, EPI_ISL_881584, EPI_ISL_881586, EPI_ISL_881587, EPI_ISL_881588, EPI_ISL_881589, EPI_ISL_881591, EPI_ISL_881592, EPI_ISL_881593, EPI_ISL_881595, EPI_ISL_881597, EPI_ISL_881598, EPI_ISL_881599, EPI_ISL_881600, EPI_ISL_881601, EPI_ISL_881603, EPI_ISL_881605, EPI_ISL_881606, EPI_ISL_881607, EPI_ISL_881608, EPI_ISL_881610, EPI_ISL_881611, EPI_ISL_881612, EPI_ISL_881615 | see above      | Lighthouse Lab in Alderley Park | Wellcome Sanger Institute for the COVID-19 Genomics UK (COG-UK) Consortium | Jacquelyn Wynn, Mairead Hyland, The Lighthouse Lab in Alderley Park and Alex Alderton, Roberto Amato, Sonia Goncalves, Ewan Harrison, David K. Jackson, Ian Johnston, Dominic Kwiatkowski, Cordelia Langford, John Sillitoe on behalf of the Wellcome Sanger Institute COVID-19 Surveillance Team |
| EPI_ISL_881618                                                                                                                                                                                                                                                                                                                                                                                                                                                                                                                                                                                                                                                                                                                                                                                                                                                                                                                                                                                                                                                                                                                                                                                                                                                                                                                                                                                                                                                                                                                                                                                                                                                                                                                                                                                                                                                                                                                                                                                                                                                                                                                                                                                                                                                                                                                                                                                                                                                                                                                                                                                                                                                                                                                                                                                                                                                 | EPI_ISL_881618 | Lighthouse Lab in Milton Keynes | Wellcome Sanger Institute for the COVID-19 Genomics UK (COG-UK) Consortium | The Lighthouse Lab in Milton Keynes and Alex Alderton, Roberto Amato, Sonia Goncalves, Ewan Harrison, David K. Jackson, Ian Johnston, Dominic Kwiatkowski, Cordelia Langford, John Sillitoe on behalf of the Wellcome Sanger Institute COVID-19 Surveillance Team                                 |
| EPI_ISL_881619                                                                                                                                                                                                                                                                                                                                                                                                                                                                                                                                                                                                                                                                                                                                                                                                                                                                                                                                                                                                                                                                                                                                                                                                                                                                                                                                                                                                                                                                                                                                                                                                                                                                                                                                                                                                                                                                                                                                                                                                                                                                                                                                                                                                                                                                                                                                                                                                                                                                                                                                                                                                                                                                                                                                                                                                                                                 | EPI_ISL_881619 | Lighthouse Lab in Cambridge     | Wellcome Sanger Institute for the COVID-19 Genomics UK (COG-UK) Consortium | Rob Howes, The Lighthouse Lab in Cambridge and Alex Alderton, Roberto Amato, Sonia Goncalves, Ewan Harrison, David K. Jackson, Ian Johnston, Dominic Kwiatkowski, Cordelia Langford, John Sillitoe on behalf of the Wellcome Sanger Institute COVID-19 Surveillance Team                          |
| EPI_ISL_881621                                                                                                                                                                                                                                                                                                                                                                                                                                                                                                                                                                                                                                                                                                                                                                                                                                                                                                                                                                                                                                                                                                                                                                                                                                                                                                                                                                                                                                                                                                                                                                                                                                                                                                                                                                                                                                                                                                                                                                                                                                                                                                                                                                                                                                                                                                                                                                                                                                                                                                                                                                                                                                                                                                                                                                                                                                                 | EPI_ISL_881621 | Lighthouse Lab in Milton Keynes | Wellcome Sanger Institute for the COVID-19 Genomics UK (COG-UK) Consortium | The Lighthouse Lab in Milton Keynes and Alex Alderton, Roberto Amato, Sonia Goncalves, Ewan Harrison, David K. Jackson, Ian Johnston, Dominic Kwiatkowski, Cordelia Langford, John Sillitoe on behalf of the Wellcome Sanger Institute COVID-19 Surveillance Team                                 |
| EPI_ISL_881622, EPI_ISL_881624, EPI_ISL_881625, EPI_ISL_881626, EPI_ISL_881627, EPI_ISL_881628, EPI_ISL_881629, EPI_ISL_881630, EPI_ISL_881631, EPI_ISL_881632, EPI_ISL_881633, EPI_ISL_881634, EPI_ISL_881635, EPI_ISL_881636, EPI_ISL_881637, EPI_ISL_881639, EPI_ISL_881640, EPI_ISL_881641, EPI_ISL_881642, EPI_ISL_881643, EPI_ISL_881644, EPI_ISL_881645, EPI_ISL_881646, EPI_ISL_881647, EPI_ISL_881648, EPI_ISL_881649, EPI_ISL_881650, EPI_ISL_881651, EPI_ISL_881652, EPI_ISL_881653, EPI_ISL_881654, EPI_ISL_881655, EPI_ISL_881656, EPI_ISL_881657, EPI_ISL_881658, EPI_ISL_881659, EPI_ISL_881660, EPI_ISL_881661, EPI_ISL_881662, EPI_ISL_881663, EPI_ISL_881664, EPI_ISL_881665, EPI_ISL_881666, EPI_ISL_881667, EPI_ISL_881668, EPI_ISL_881669, EPI_ISL_881670, EPI_ISL_881671, EPI_ISL_881672, EPI_ISL_881673, EPI_ISL_881674, EPI_ISL_881675, EPI_ISL_881676, EPI_ISL_881677, EPI_ISL_881678, EPI_ISL_881679, EPI_ISL_881680, EPI_ISL_881681, EPI_ISL_881682, EPI_ISL_881683, EPI_ISL_881684, EPI_ISL_881685, EPI_ISL_881686, EPI_ISL_881687, EPI_ISL_881688, EPI_ISL_881689, EPI_ISL_881690, EPI_ISL_881691, EPI_ISL_881692, EPI_ISL_881693, EPI_ISL_881694, EPI_ISL_881695, EPI_ISL_881696, EPI_ISL_881697, EPI_ISL_881698, EPI_ISL_881699, EPI_ISL_881700, EPI_ISL_881701, EPI_ISL_881702, EPI_ISL_881703, EPI_ISL_881704, EPI_ISL_881705, EPI_ISL_881706, EPI_ISL_881707, EPI_ISL_881708, EPI_ISL_881709, EPI_ISL_881710, EPI_ISL_881711, EPI_ISL_881712, EPI_ISL_881713, EPI_ISL_881714, EPI_ISL_881715, EPI_ISL_881716, EPI_ISL_881717, EPI_ISL_881718, EPI_ISL_881719, EPI_ISL_881720, EPI_ISL_881721, EPI_ISL_881722, EPI_ISL_881723, EPI_ISL_881724, EPI_ISL_881725, EPI_ISL_881726, EPI_ISL_881727, EPI_ISL_881728, EPI_ISL_881729, EPI_ISL_881730, EPI_ISL_881731, EPI_ISL_881732, EPI_ISL_881733, EPI_ISL_881734, EPI_ISL_881735, EPI_ISL_881736, EPI_ISL_881737, EPI_ISL_881738, EPI_ISL_881739, EPI_ISL_881740, EPI_ISL_881741, EPI_ISL_881742, EPI_ISL_881743, EPI_ISL_881744, EPI_ISL_881745, EPI_ISL                                                                                                                                                                                                                                                                                                                                                                                                                                                                                                                                                                                                                                                                                                                                                                                                                        |                |                                 |                                                                            |                                                                                                                                                                                                                                                                                                   |



|                                                                                                                                                                                                                                                                                                                                                                                                                                                                                                                                                                                                                                                                                                                                                                                                                                                                                                                                                                                                                                                                                                                                                                                                                                                                                                                                                                                                                                                                                                                                                                |                                                                                                                                                                                                                     |                                                                            |                                                                                                                                                                                                                                                                                                                                                                                                                                                                                                                                                                                                                                                                                         |
|----------------------------------------------------------------------------------------------------------------------------------------------------------------------------------------------------------------------------------------------------------------------------------------------------------------------------------------------------------------------------------------------------------------------------------------------------------------------------------------------------------------------------------------------------------------------------------------------------------------------------------------------------------------------------------------------------------------------------------------------------------------------------------------------------------------------------------------------------------------------------------------------------------------------------------------------------------------------------------------------------------------------------------------------------------------------------------------------------------------------------------------------------------------------------------------------------------------------------------------------------------------------------------------------------------------------------------------------------------------------------------------------------------------------------------------------------------------------------------------------------------------------------------------------------------------|---------------------------------------------------------------------------------------------------------------------------------------------------------------------------------------------------------------------|----------------------------------------------------------------------------|-----------------------------------------------------------------------------------------------------------------------------------------------------------------------------------------------------------------------------------------------------------------------------------------------------------------------------------------------------------------------------------------------------------------------------------------------------------------------------------------------------------------------------------------------------------------------------------------------------------------------------------------------------------------------------------------|
| EPI_ISL_916801, EPI_ISL_916805, EPI_ISL_916831, EPI_ISL_916835, EPI_ISL_916836, EPI_ISL_916839, EPI_ISL_916843, EPI_ISL_916844, EPI_ISL_916846, EPI_ISL_916849, EPI_ISL_916851, EPI_ISL_916852, EPI_ISL_916854, EPI_ISL_916857, EPI_ISL_916861, EPI_ISL_916864, EPI_ISL_916866, EPI_ISL_916872, EPI_ISL_916885, EPI_ISL_916919, EPI_ISL_916920, EPI_ISL_916927, EPI_ISL_916934, EPI_ISL_916939, EPI_ISL_916950, EPI_ISL_916962, EPI_ISL_916982, EPI_ISL_916992, EPI_ISL_917001, EPI_ISL_917011, EPI_ISL_917015, EPI_ISL_917034, EPI_ISL_917060, EPI_ISL_917064, EPI_ISL_917069, EPI_ISL_917094, EPI_ISL_917095, EPI_ISL_917103, EPI_ISL_917117, EPI_ISL_917121, EPI_ISL_917131, EPI_ISL_917153, EPI_ISL_917792, EPI_ISL_918061                                                                                                                                                                                                                                                                                                                                                                                                                                                                                                                                                                                                                                                                                                                                                                                                                                 |                                                                                                                                                                                                                     |                                                                            |                                                                                                                                                                                                                                                                                                                                                                                                                                                                                                                                                                                                                                                                                         |
| see above                                                                                                                                                                                                                                                                                                                                                                                                                                                                                                                                                                                                                                                                                                                                                                                                                                                                                                                                                                                                                                                                                                                                                                                                                                                                                                                                                                                                                                                                                                                                                      | Lighthouse Lab in Alderley Park                                                                                                                                                                                     | Wellcome Sanger Institute for the COVID-19 Genomics UK (COG-UK) Consortium | Jacquelyn Wynn, Mairead Hyland, The Lighthouse Lab in Alderley Park and Alex Alderton, Roberto Amato, Sonia Goncalves, Ewan Harrison, David K. Jackson, Ian Johnston, Dominic Kwiatkowski, Cordelia Langford, John Sillitoe on behalf of the Wellcome Sanger Institute COVID-19 Surveillance Team                                                                                                                                                                                                                                                                                                                                                                                       |
| EPI_ISL_918064, EPI_ISL_918066, EPI_ISL_918081, EPI_ISL_918084, EPI_ISL_918085                                                                                                                                                                                                                                                                                                                                                                                                                                                                                                                                                                                                                                                                                                                                                                                                                                                                                                                                                                                                                                                                                                                                                                                                                                                                                                                                                                                                                                                                                 | Lighthouse Lab in Glasgow                                                                                                                                                                                           | Wellcome Sanger Institute for the COVID-19 Genomics UK (COG-UK) Consortium | Harper VanSteenhouse, Yumi Kasai, David Gray, Carol Clugston, Anna Dominiczak and Alex Alderton, Roberto Amato, Sonia Goncalves, Ewan Harrison, David K. Jackson, Ian Johnston, Dominic Kwiatkowski, Cordelia Langford, John Sillitoe on behalf of the Wellcome Sanger Institute COVID-19 Surveillance Team                                                                                                                                                                                                                                                                                                                                                                             |
| EPI_ISL_918686, EPI_ISL_918687, EPI_ISL_918688, EPI_ISL_918689, EPI_ISL_918690, EPI_ISL_918691, EPI_ISL_918692, EPI_ISL_918693, EPI_ISL_918694, EPI_ISL_918695, EPI_ISL_918696, EPI_ISL_918697, EPI_ISL_918701, EPI_ISL_918733, EPI_ISL_918734, EPI_ISL_918788, EPI_ISL_918789, EPI_ISL_918790, EPI_ISL_918842, EPI_ISL_918843, EPI_ISL_918844, EPI_ISL_918845, EPI_ISL_918856, EPI_ISL_918859, EPI_ISL_918860, EPI_ISL_918861, EPI_ISL_918862, EPI_ISL_918863, EPI_ISL_918864, EPI_ISL_918866, EPI_ISL_918867, EPI_ISL_918868, EPI_ISL_918871, EPI_ISL_918872, EPI_ISL_918873, EPI_ISL_918874, EPI_ISL_918875, EPI_ISL_918876, EPI_ISL_918877, EPI_ISL_918878, EPI_ISL_918879, EPI_ISL_918880, EPI_ISL_918881, EPI_ISL_918882, EPI_ISL_918884, EPI_ISL_918885, EPI_ISL_918886, EPI_ISL_918887, EPI_ISL_918888, EPI_ISL_918889, EPI_ISL_918891, EPI_ISL_918892, EPI_ISL_918893, EPI_ISL_918894, EPI_ISL_918895, EPI_ISL_918896, EPI_ISL_918897, EPI_ISL_918898, EPI_ISL_918899, EPI_ISL_918912, EPI_ISL_918913, EPI_ISL_918914, EPI_ISL_918915, EPI_ISL_918916, EPI_ISL_918917, EPI_ISL_918918, EPI_ISL_918919, EPI_ISL_918920, EPI_ISL_918921, EPI_ISL_918922, EPI_ISL_918923, EPI_ISL_918924, EPI_ISL_918925, EPI_ISL_918926, EPI_ISL_918927, EPI_ISL_918928, EPI_ISL_918929, EPI_ISL_918930, EPI_ISL_918931, EPI_ISL_918932, EPI_ISL_918933, EPI_ISL_918934, EPI_ISL_918935, EPI_ISL_918936, EPI_ISL_918937, EPI_ISL_918938, EPI_ISL_918939, EPI_ISL_918973, EPI_ISL_918974, EPI_ISL_918975, EPI_ISL_918976, EPI_ISL_918978, EPI_ISL_918981, EPI_ISL_918983 |                                                                                                                                                                                                                     |                                                                            |                                                                                                                                                                                                                                                                                                                                                                                                                                                                                                                                                                                                                                                                                         |
| see above                                                                                                                                                                                                                                                                                                                                                                                                                                                                                                                                                                                                                                                                                                                                                                                                                                                                                                                                                                                                                                                                                                                                                                                                                                                                                                                                                                                                                                                                                                                                                      | University of Birmingham                                                                                                                                                                                            | COVID-19 Genomics UK (COG-UK) Consortium                                   | Institute of Microbiology, University of Birmingham: Claire McMurray, Joanne Stockton, Samuel Nicholls, Radoslaw Poplawski, Will Rowe, Josh Quick, Nicholas Loman. University of Birmingham Testing Laboratory: Celina M Whalley, Andrew Bosworth, Charlotte Poxon, Kasun Wanigasooriya, Oliver Pickles, Mike Kidd, Alex Richter, Andrew D Beggs PHE Heartlands Lab: Husam Osman, Andrew Bosworth. Queen Elizabeth Hospital: Anna Casey                                                                                                                                                                                                                                                 |
| EPI_ISL_919011, EPI_ISL_919012, EPI_ISL_919017, EPI_ISL_919029, EPI_ISL_919037, EPI_ISL_919039, EPI_ISL_919041, EPI_ISL_919043, EPI_ISL_919044, EPI_ISL_919045, EPI_ISL_919046, EPI_ISL_919047, EPI_ISL_919048, EPI_ISL_919049, EPI_ISL_919050, EPI_ISL_919051, EPI_ISL_919052, EPI_ISL_919056, EPI_ISL_919076, EPI_ISL_919078, EPI_ISL_919086, EPI_ISL_919088, EPI_ISL_919089, EPI_ISL_919090, EPI_ISL_919094, EPI_ISL_919096, EPI_ISL_919098, EPI_ISL_919105                                                                                                                                                                                                                                                                                                                                                                                                                                                                                                                                                                                                                                                                                                                                                                                                                                                                                                                                                                                                                                                                                                 |                                                                                                                                                                                                                     |                                                                            |                                                                                                                                                                                                                                                                                                                                                                                                                                                                                                                                                                                                                                                                                         |
| see above                                                                                                                                                                                                                                                                                                                                                                                                                                                                                                                                                                                                                                                                                                                                                                                                                                                                                                                                                                                                                                                                                                                                                                                                                                                                                                                                                                                                                                                                                                                                                      | Department of Pathology, University of Cambridge                                                                                                                                                                    | COVID-19 Genomics UK (COG-UK) Consortium                                   | Aminu S. Jahun, Yasmin Chaudhry, Iliana Georgana, Myra Hosmillo, Rhys Izu, Martin D. Curran, Surendra Parmar, Ian Goodfellow                                                                                                                                                                                                                                                                                                                                                                                                                                                                                                                                                            |
| EPI_ISL_919190, EPI_ISL_919191, EPI_ISL_919192, EPI_ISL_919193, EPI_ISL_919194, EPI_ISL_919195, EPI_ISL_919197, EPI_ISL_919198, EPI_ISL_919200                                                                                                                                                                                                                                                                                                                                                                                                                                                                                                                                                                                                                                                                                                                                                                                                                                                                                                                                                                                                                                                                                                                                                                                                                                                                                                                                                                                                                 | West of Scotland Specialist Virology Centre, NHSGGC / MRC-University of Glasgow Centre for Virus Research                                                                                                           | COVID-19 Genomics UK (COG-UK) Consortium                                   | Ana da Silva Filipe, Natasha Johnson, Kathy Smollett, Daniel Mair, Stephen Carmichael, Alice Brooks, Lily Tong, Jenna Nichols, Kyriaki Nomikou; Sarah McDonald; Richard Orton, Joseph Hughes, Sreenu Vattipally, David L Robertson; Alasdair MacLean, Rory Gunson; Sharif Shaaban, Matthew Holden; Rachel Blacow, Guy Mollett, Kathy Li, James Shepherd, Antonia Ho, Emma Thomson                                                                                                                                                                                                                                                                                                       |
| EPI_ISL_919337, EPI_ISL_919338                                                                                                                                                                                                                                                                                                                                                                                                                                                                                                                                                                                                                                                                                                                                                                                                                                                                                                                                                                                                                                                                                                                                                                                                                                                                                                                                                                                                                                                                                                                                 | Virology Department, Royal Infirmary of Edinburgh, NHS Lothian / School of Biological Sciences, University of Edinburgh / Institute of Genetics and Molecular Medicine, University of Edinburgh                     | COVID-19 Genomics UK (COG-UK) Consortium                                   | McHugh M, Dewar R, Rooke S, Gallagher M, Balcaza C, O'Toole Á, Scher E, Hill V, McCrone JT, Colquhoun R, Yu X, Jackson B, Rambaut A, Williams TC, Templeton K                                                                                                                                                                                                                                                                                                                                                                                                                                                                                                                           |
| EPI_ISL_919467, EPI_ISL_919468, EPI_ISL_919469, EPI_ISL_919470, EPI_ISL_919471, EPI_ISL_919472, EPI_ISL_919473, EPI_ISL_919474, EPI_ISL_919475, EPI_ISL_919478, EPI_ISL_919479, EPI_ISL_919480, EPI_ISL_919481, EPI_ISL_919482, EPI_ISL_919483, EPI_ISL_919484, EPI_ISL_919515, EPI_ISL_919516, EPI_ISL_919517, EPI_ISL_919539, EPI_ISL_919591, EPI_ISL_919592, EPI_ISL_919593, EPI_ISL_919632, EPI_ISL_919634, EPI_ISL_919641, EPI_ISL_919642, EPI_ISL_919643, EPI_ISL_919644, EPI_ISL_919646                                                                                                                                                                                                                                                                                                                                                                                                                                                                                                                                                                                                                                                                                                                                                                                                                                                                                                                                                                                                                                                                 |                                                                                                                                                                                                                     |                                                                            |                                                                                                                                                                                                                                                                                                                                                                                                                                                                                                                                                                                                                                                                                         |
| see above                                                                                                                                                                                                                                                                                                                                                                                                                                                                                                                                                                                                                                                                                                                                                                                                                                                                                                                                                                                                                                                                                                                                                                                                                                                                                                                                                                                                                                                                                                                                                      | Liverpool Clinical Laboratories                                                                                                                                                                                     | COVID-19 Genomics UK (COG-UK) Consortium                                   | Sam Haldenby, Anita Lucaci, Steve Paterson, Julian Hiscox, Alistair Darby, M Almsaud, A Alrezaihi, Muhannad Alruwaili, Stuart D Armstrong, Jones Benjamin, Eleanor G Bentley, Anu Chawla, Jordan J Clark, Angela Cowell, Richard Eccles, Isabel Garcia-Dorival, Matthew Gemmell, Alessandro Gerada, PKF Gilmore, Richard Gregory, Ximeng Han, Catherine Hartley, Margaret Hughes, Miren Iturriza-Gomara, James Johnson, L Luu, Jenifer Manson, Charlotte Nelson, Elaine O'Toole, Cassie Olateju, Rebekah Penrice-Randal , Lucille Rainbow, N.P Randle, Trevor Ian Robinson, Parul Sharma, Ghada T Shawli, James P Stewart, Neil Swainston, Eaterina Vamos, Joanne Watts, Mark Whitehead |
| EPI_ISL_919852                                                                                                                                                                                                                                                                                                                                                                                                                                                                                                                                                                                                                                                                                                                                                                                                                                                                                                                                                                                                                                                                                                                                                                                                                                                                                                                                                                                                                                                                                                                                                 | Barts Health NHS Trust                                                                                                                                                                                              | COVID-19 Genomics UK (COG-UK) Consortium                                   | CUTINO-MOGUEL, Maria-Teresa; HARRINGTON, David; OWOYEMI, Dola; KULASEGARAN-SHYLINI, Raghavendran; BROAD, Claire; KELE, Beatrix                                                                                                                                                                                                                                                                                                                                                                                                                                                                                                                                                          |
| EPI_ISL_920000, EPI_ISL_920001, EPI_ISL_920002, EPI_ISL_920003, EPI_ISL_920004, EPI_ISL_920005, EPI_ISL_920006, EPI_ISL_920007, EPI_ISL_920008, EPI_ISL_920009, EPI_ISL_920010, EPI_ISL_920011, EPI_ISL_920012, EPI_ISL_920013, EPI_ISL_920014, EPI_ISL_920015, EPI_ISL_920016, EPI_ISL_920017, EPI_ISL_920018, EPI_ISL_920019, EPI_ISL_920020, EPI_ISL_920021, EPI_ISL_920022, EPI_ISL_920023, EPI_ISL_920024, EPI_ISL_920025, EPI_ISL_920027, EPI_ISL_920028, EPI_ISL_920029, EPI_ISL_920030, EPI_ISL_920031, EPI_ISL_920032, EPI_ISL_920033, EPI_ISL_920034, EPI_ISL_920043, EPI_ISL_920044, EPI_ISL_920050                                                                                                                                                                                                                                                                                                                                                                                                                                                                                                                                                                                                                                                                                                                                                                                                                                                                                                                                                 |                                                                                                                                                                                                                     |                                                                            |                                                                                                                                                                                                                                                                                                                                                                                                                                                                                                                                                                                                                                                                                         |
| see above                                                                                                                                                                                                                                                                                                                                                                                                                                                                                                                                                                                                                                                                                                                                                                                                                                                                                                                                                                                                                                                                                                                                                                                                                                                                                                                                                                                                                                                                                                                                                      | University College London, Great Ormond Street Hospital for Children NHS Foundation Trust, Imperial College Healthcare NHS Trust                                                                                    | COVID-19 Genomics UK (COG-UK) Consortium                                   | Sergi Castellano, Rachel Williams, Mark Kristiansen, Paola Resende Silva, Sunando Roy, Tony Brooks, Helena Tutill, Paola Niola, Patricia Dyal, Charlotte Williams, Leysa Forrest, Yasmin Panchbhaya, Jacqueline Findlay, Samuel Weeks, Julianne Brown, Kathryn Harris, Paul Randell, James Price, Alison Holmes, Judith Breuer                                                                                                                                                                                                                                                                                                                                                          |
| EPI_ISL_920188, EPI_ISL_920191, EPI_ISL_920193, EPI_ISL_920241, EPI_ISL_920298, EPI_ISL_920299, EPI_ISL_920309, EPI_ISL_920310, EPI_ISL_920318, EPI_ISL_920327, EPI_ISL_920328, EPI_ISL_920329, EPI_ISL_920330, EPI_ISL_920337, EPI_ISL_920338, EPI_ISL_920339, EPI_ISL_920345, EPI_ISL_920353, EPI_ISL_920357, EPI_ISL_920362, EPI_ISL_920363, EPI_ISL_920371, EPI_ISL_920458, EPI_ISL_920466, EPI_ISL_920467, EPI_ISL_920501                                                                                                                                                                                                                                                                                                                                                                                                                                                                                                                                                                                                                                                                                                                                                                                                                                                                                                                                                                                                                                                                                                                                 |                                                                                                                                                                                                                     |                                                                            |                                                                                                                                                                                                                                                                                                                                                                                                                                                                                                                                                                                                                                                                                         |
| see above                                                                                                                                                                                                                                                                                                                                                                                                                                                                                                                                                                                                                                                                                                                                                                                                                                                                                                                                                                                                                                                                                                                                                                                                                                                                                                                                                                                                                                                                                                                                                      | University College London Hospital                                                                                                                                                                                  | COVID-19 Genomics UK (COG-UK) Consortium                                   | Judith Heaney, Matthew Byott, Catherine Houlihan, Dan Frampton, Stuart Kirk, Moira Spyer and Eleni Nastouli                                                                                                                                                                                                                                                                                                                                                                                                                                                                                                                                                                             |
| EPI_ISL_920851, EPI_ISL_920860, EPI_ISL_920861, EPI_ISL_920862, EPI_ISL_920863, EPI_ISL_920864, EPI_ISL_920865, EPI_ISL_920866, EPI_ISL_920867, EPI_ISL_920868, EPI_ISL_920869, EPI_ISL_920870, EPI_ISL_920871, EPI_ISL_920872, EPI_ISL_920873, EPI_ISL_920874, EPI_ISL_920875, EPI_ISL_920876, EPI_ISL_920877, EPI_ISL_920878, EPI_ISL_920879, EPI_ISL_920880, EPI_ISL_920881, EPI_ISL_920882, EPI_ISL_920883, EPI_ISL_920884, EPI_ISL_920885, EPI_ISL_920886                                                                                                                                                                                                                                                                                                                                                                                                                                                                                                                                                                                                                                                                                                                                                                                                                                                                                                                                                                                                                                                                                                 |                                                                                                                                                                                                                     |                                                                            |                                                                                                                                                                                                                                                                                                                                                                                                                                                                                                                                                                                                                                                                                         |
| see above                                                                                                                                                                                                                                                                                                                                                                                                                                                                                                                                                                                                                                                                                                                                                                                                                                                                                                                                                                                                                                                                                                                                                                                                                                                                                                                                                                                                                                                                                                                                                      | University College London, Great Ormond Street Hospital for Children NHS Foundation Trust, Imperial College Healthcare NHS Trust                                                                                    | COVID-19 Genomics UK (COG-UK) Consortium                                   | Sergi Castellano, Rachel Williams, Mark Kristiansen, Paola Resende Silva, Sunando Roy, Tony Brooks, Helena Tutill, Paola Niola, Patricia Dyal, Charlotte Williams, Leysa Forrest, Yasmin Panchbhaya, Jacqueline Findlay, Samuel Weeks, Julianne Brown, Kathryn Harris, Paul Randell, James Price, Alison Holmes, Judith Breuer                                                                                                                                                                                                                                                                                                                                                          |
| EPI_ISL_920894, EPI_ISL_920895, EPI_ISL_920896, EPI_ISL_920897, EPI_ISL_920898, EPI_ISL_920899, EPI_ISL_920900, EPI_ISL_920901, EPI_ISL_920902, EPI_ISL_920903, EPI_ISL_920904, EPI_ISL_920905, EPI_ISL_920906, EPI_ISL_920907, EPI_ISL_920908, EPI_ISL_920909, EPI_ISL_920911, EPI_ISL_920912, EPI_ISL_920913, EPI_ISL_920914, EPI_ISL_920915, EPI_ISL_920916, EPI_ISL_920917, EPI_ISL_920918, EPI_ISL_920919, EPI_ISL_920920, EPI_ISL_920921, EPI_ISL_920922, EPI_ISL_920923, EPI_ISL_920925, EPI_ISL_920926, EPI_ISL_920927, EPI_ISL_920928, EPI_ISL_920929, EPI_ISL_920930, EPI_ISL_920931, EPI_ISL_920932, EPI_ISL_920933, EPI_ISL_920935, EPI_ISL_920936, EPI_ISL_920937, EPI_ISL_920938, EPI_ISL_920939, EPI_ISL_920940, EPI_ISL_920941, EPI_ISL_920942, EPI_ISL_920944, EPI_ISL_920945, EPI_ISL_920947, EPI_ISL_920948, EPI_ISL_920949, EPI_ISL_920950, EPI_ISL_920951, EPI_ISL_920952, EPI_ISL_920953, EPI_ISL_920954, EPI_ISL_920955, EPI_ISL_920956, EPI_ISL_920957, EPI_ISL_920958, EPI_ISL_920959, EPI_ISL_920960, EPI_ISL_920961, EPI_ISL_920962, EPI_ISL_920963, EPI_ISL_920964, EPI_ISL_920965, EPI_ISL_920966, EPI_ISL_920967, EPI_ISL_920969, EPI_ISL_920970, EPI_ISL_920971, EPI_ISL_920972, EPI_ISL_920973, EPI_ISL_920974                                                                                                                                                                                                                                                                                                                 |                                                                                                                                                                                                                     |                                                                            |                                                                                                                                                                                                                                                                                                                                                                                                                                                                                                                                                                                                                                                                                         |
| see above                                                                                                                                                                                                                                                                                                                                                                                                                                                                                                                                                                                                                                                                                                                                                                                                                                                                                                                                                                                                                                                                                                                                                                                                                                                                                                                                                                                                                                                                                                                                                      | Department of Pathology, University of Cambridge                                                                                                                                                                    | COVID-19 Genomics UK (COG-UK) Consortium                                   | Aminu S. Jahun, Yasmin Chaudhry, Iliana Georgana, Myra Hosmillo, Rhys Izu, Martin D. Curran, Surendra Parmar, Ian Goodfellow                                                                                                                                                                                                                                                                                                                                                                                                                                                                                                                                                            |
| EPI_ISL_920976, EPI_ISL_920977, EPI_ISL_920978, EPI_ISL_920979, EPI_ISL_920981, EPI_ISL_920982, EPI_ISL_920983, EPI_ISL_920984, EPI_ISL_920985, EPI_ISL_920986, EPI_ISL_920987, EPI_ISL_920988, EPI_ISL_920989, EPI_ISL_920990, EPI_ISL_920991, EPI_ISL_920992, EPI_ISL_920993, EPI_ISL_920994, EPI_ISL_920995, EPI_ISL_920996, EPI_ISL_920997, EPI_ISL_920998, EPI_ISL_920999, EPI_ISL_921000, EPI_ISL_921001, EPI_ISL_921002, EPI_ISL_921003, EPI_ISL_921004, EPI_ISL_921005, EPI_ISL_921006, EPI_ISL_921007, EPI_ISL_921008, EPI_ISL_921009, EPI_ISL_921010, EPI_ISL_921018                                                                                                                                                                                                                                                                                                                                                                                                                                                                                                                                                                                                                                                                                                                                                                                                                                                                                                                                                                                 |                                                                                                                                                                                                                     |                                                                            |                                                                                                                                                                                                                                                                                                                                                                                                                                                                                                                                                                                                                                                                                         |
| see above                                                                                                                                                                                                                                                                                                                                                                                                                                                                                                                                                                                                                                                                                                                                                                                                                                                                                                                                                                                                                                                                                                                                                                                                                                                                                                                                                                                                                                                                                                                                                      | Regional Virus Laboratory, Belfast Health and Social Care Trust                                                                                                                                                     | COVID-19 Genomics UK (COG-UK) Consortium                                   | Conall McCaughey, James McKenna, Tanya Curran, Susan Feeney, Alison Watt, Ciara Cox, Mairead Connor, Zoltan Molnar, David Simpson, Derek Fairley                                                                                                                                                                                                                                                                                                                                                                                                                                                                                                                                        |
| EPI_ISL_921488, EPI_ISL_921489, EPI_ISL_921490, EPI_ISL_921491, EPI_ISL_921492, EPI_ISL_921493, EPI_ISL_921495, EPI_ISL_921496, EPI_ISL_921497, EPI_ISL_921498, EPI_ISL_921499, EPI_ISL_921500, EPI_ISL_921501, EPI_ISL_921503, EPI_ISL_921504, EPI_ISL_921505, EPI_ISL_921506, EPI_ISL_921507, EPI_ISL_921508, EPI_ISL_921509, EPI_ISL_921510, EPI_ISL_921511, EPI_ISL_921512, EPI_ISL_921513, EPI_ISL_921514, EPI_ISL_921515, EPI_ISL_921516, EPI_ISL_921517, EPI_ISL_921518, EPI_ISL_921519, EPI_ISL_921520, EPI_ISL_921521, EPI_ISL_921522, EPI_ISL_921523, EPI_ISL_921524, EPI_ISL_921525, EPI_ISL_921526, EPI_ISL_921527, EPI_ISL_921528, EPI_ISL_921529, EPI_ISL_921530, EPI_ISL_921531, EPI_ISL_921532, EPI_ISL_921533, EPI_ISL_921534, EPI_ISL_921535, EPI_ISL_921536, EPI_ISL_921537, EPI_ISL_921538, EPI_ISL_921539, EPI_ISL_921540, EPI_ISL_921541, EPI_ISL_921542, EPI_ISL_921543, EPI_ISL_921544, EPI_ISL_921545, EPI_ISL_921546, EPI_ISL_921547, EPI_ISL_921548, EPI_ISL_921549, EPI_ISL_921550, EPI_ISL_921551, EPI_ISL_921552, EPI_ISL_921553                                                                                                                                                                                                                                                                                                                                                                                                                                                                                                 |                                                                                                                                                                                                                     |                                                                            |                                                                                                                                                                                                                                                                                                                                                                                                                                                                                                                                                                                                                                                                                         |
| see above                                                                                                                                                                                                                                                                                                                                                                                                                                                                                                                                                                                                                                                                                                                                                                                                                                                                                                                                                                                                                                                                                                                                                                                                                                                                                                                                                                                                                                                                                                                                                      | Northumbria University / South Tees Hospitals NHS Foundation Trust / North Cumbria Integrated Care NHS Foundation Trust / North Tees and Hartlepool NHS Foundation Trust / Newcastle Hospitals NHS Foundation Trust | COVID-19 Genomics UK (COG-UK) Consortium                                   | Darren L Smith,Andrew Nelson,Matthew Bashton,Greg R Young,Joshua Loh,John Allan,Mohammad A Tariq,Giles S Holt,Gary Black,Wen C Yew,Lynn Dover,Paul Baker,Steve Liggett,Sarah Essex,Jane Greenaway,Debra Padgett,Clive Graham,Garren Scott,Edward Barton,Emma Swindells,Brendan Payne,Jennifer Collins,Yusri Taha,Gary Eltringham                                                                                                                                                                                                                                                                                                                                                        |
| EPI_ISL_922071, EPI_ISL_922072, EPI_ISL_922074, EPI_ISL_922075, EPI_ISL_922077, EPI_ISL_922078, EPI_ISL_922079, EPI_ISL_922080, EPI_ISL_922081, EPI_ISL_922082, EPI_ISL_922084, EPI_ISL_922085, EPI_ISL_922086, EPI_ISL_922087, EPI_ISL_922088, EPI_ISL_922089, EPI_ISL_922090, EPI_ISL_922091, EPI_ISL_922092, EPI_ISL_922093, EPI_ISL_922094, EPI_ISL_922095, EPI_ISL_922096, EPI_ISL_922097, EPI_ISL_922098, EPI_ISL_922099, EPI_ISL_922100, EPI_ISL_922101, EPI_ISL_922102, EPI_ISL_922103, EPI_ISL_922104, EPI_ISL_922105, EPI_ISL_922106, EPI_ISL_922107, EPI_ISL_922108, EPI_ISL_922109, EPI_ISL_922110, EPI_ISL_922111, EPI_ISL_922112, EPI_ISL_922113, EPI_ISL_922114, EPI_ISL_922115, EPI_ISL_922116, EPI_ISL_922117, EPI_ISL_922118, EPI_ISL_922119, EPI_ISL_922120, EPI_ISL_922121, EPI_ISL_922122, EPI_ISL_922123, EPI_ISL_922124, EPI_ISL_922125                                                                                                                                                                                                                                                                                                                                                                                                                                                                                                                                                                                                                                                                                                 |                                                                                                                                                                                                                     |                                                                            |                                                                                                                                                                                                                                                                                                                                                                                                                                                                                                                                                                                                                                                                                         |
| see above                                                                                                                                                                                                                                                                                                                                                                                                                                                                                                                                                                                                                                                                                                                                                                                                                                                                                                                                                                                                                                                                                                                                                                                                                                                                                                                                                                                                                                                                                                                                                      | Lincolnshire Hospitals and DeepSeq Nottingham                                                                                                                                                                       | COVID-19 Genomics UK (COG-UK) Consortium                                   | Nichola Duckworth, Tim Sloan, Sarah Walsh, Jonathan Ball, Patrick McClure, Joseph Chappell, Nadine Holmes, Matthew Carlisle, Christopher Moore, Fei Sang, Johnny Debebe, Victoria Wright, Matthew Loose                                                                                                                                                                                                                                                                                                                                                                                                                                                                                 |

|                                                                                                                                                                                                                                                                                                                                                                                                                                                                                                                                                                                                                                                                                                                                                                                                                                                                                                                                                                                                                                                                                                                                                                                                                                                                                                                                                                                                                                                                                                                                                                                                                                                                                                                                                                                                                                                                                                                                                                                                                                                                                                                                                                                                                                                                                                                                                                                                                                |           |                                                                                                                                                                                                                     |                                                                            |                                                                                                                                                                                                                                                                                                                                                                           |
|--------------------------------------------------------------------------------------------------------------------------------------------------------------------------------------------------------------------------------------------------------------------------------------------------------------------------------------------------------------------------------------------------------------------------------------------------------------------------------------------------------------------------------------------------------------------------------------------------------------------------------------------------------------------------------------------------------------------------------------------------------------------------------------------------------------------------------------------------------------------------------------------------------------------------------------------------------------------------------------------------------------------------------------------------------------------------------------------------------------------------------------------------------------------------------------------------------------------------------------------------------------------------------------------------------------------------------------------------------------------------------------------------------------------------------------------------------------------------------------------------------------------------------------------------------------------------------------------------------------------------------------------------------------------------------------------------------------------------------------------------------------------------------------------------------------------------------------------------------------------------------------------------------------------------------------------------------------------------------------------------------------------------------------------------------------------------------------------------------------------------------------------------------------------------------------------------------------------------------------------------------------------------------------------------------------------------------------------------------------------------------------------------------------------------------|-----------|---------------------------------------------------------------------------------------------------------------------------------------------------------------------------------------------------------------------|----------------------------------------------------------------------------|---------------------------------------------------------------------------------------------------------------------------------------------------------------------------------------------------------------------------------------------------------------------------------------------------------------------------------------------------------------------------|
| EPI_ISL_922206, EPI_ISL_922207, EPI_ISL_922211, EPI_ISL_922212, EPI_ISL_922213, EPI_ISL_922214, EPI_ISL_922215, EPI_ISL_922216, EPI_ISL_922217, EPI_ISL_922218, EPI_ISL_922219, EPI_ISL_922220, EPI_ISL_922223, EPI_ISL_922224, EPI_ISL_922225, EPI_ISL_922226, EPI_ISL_922227, EPI_ISL_922228, EPI_ISL_922229, EPI_ISL_922230, EPI_ISL_922231, EPI_ISL_922232, EPI_ISL_922233, EPI_ISL_922234, EPI_ISL_922237, EPI_ISL_922238, EPI_ISL_922239, EPI_ISL_922240, EPI_ISL_922259, EPI_ISL_922294, EPI_ISL_922349                                                                                                                                                                                                                                                                                                                                                                                                                                                                                                                                                                                                                                                                                                                                                                                                                                                                                                                                                                                                                                                                                                                                                                                                                                                                                                                                                                                                                                                                                                                                                                                                                                                                                                                                                                                                                                                                                                                 | see above | Oxford Viromics, NDM, University of Oxford; Oxford University Hospitals; Basingstoke and North Hampshire Hospital                                                                                                   | COVID-19 Genomics UK (COG-UK) Consortium                                   | Tanya Golubchik, David Bonsall, George Macintyre, Amy Trebes, Mariateresa de Cesare, Catrin Moore, Alex Mobbs, Anita Justice, Robert Shaw, Monique Andersson, Timothy Peto, Emma Wise, Nathan Moore, Jessica Lynch, Nick Cortes, Matilde Mori, Stephen Kidd, David Buck, John Todd, Christophe Fraser                                                                     |
| EPI_ISL_922360, EPI_ISL_922361, EPI_ISL_922362, EPI_ISL_922363, EPI_ISL_922364, EPI_ISL_922380, EPI_ISL_922384, EPI_ISL_922387, EPI_ISL_922388, EPI_ISL_922392, EPI_ISL_922393, EPI_ISL_922395, EPI_ISL_922396, EPI_ISL_922397, EPI_ISL_922398, EPI_ISL_922399, EPI_ISL_922401, EPI_ISL_922402, EPI_ISL_922403, EPI_ISL_922404, EPI_ISL_922410, EPI_ISL_922413, EPI_ISL_922458, EPI_ISL_922567, EPI_ISL_922580, EPI_ISL_922582, EPI_ISL_922588, EPI_ISL_922589, EPI_ISL_922590, EPI_ISL_922640, EPI_ISL_922644, EPI_ISL_922645, EPI_ISL_922647, EPI_ISL_922648, EPI_ISL_922649, EPI_ISL_922650, EPI_ISL_922651, EPI_ISL_922652, EPI_ISL_922653, EPI_ISL_922654, EPI_ISL_922655, EPI_ISL_922659, EPI_ISL_922974, EPI_ISL_922975                                                                                                                                                                                                                                                                                                                                                                                                                                                                                                                                                                                                                                                                                                                                                                                                                                                                                                                                                                                                                                                                                                                                                                                                                                                                                                                                                                                                                                                                                                                                                                                                                                                                                                 | see above | Wales Specialist Virology Centre Sequencing lab: Pathogen Genomics Unit                                                                                                                                             | Public Health Wales Microbiology Cardiff Wales Specialist Virology Centre  | Catherine Moore, Johnathan Evans, Laura Gifford, Malorie Perry, Simon Cottrell, Angela Marchbank, Alec Birchley, Alexander Adams, Amy Gaskin, Bree Gatica-Wilcox, Jason Coombes, Joel Southgate, Lauren Gilbert, Lee Graham, Nicole Pacchiarini, Sara Kumzienne-Summerhayes, Sarah Taylor, Sophie Jones, Sara Rey, Matthew Bull, Joanne Watkins, Sally Corden, Tom Connor |
| EPI_ISL_923262, EPI_ISL_923276, EPI_ISL_923279, EPI_ISL_923280, EPI_ISL_923281, EPI_ISL_923284, EPI_ISL_923287, EPI_ISL_923290, EPI_ISL_923291, EPI_ISL_923292, EPI_ISL_923293, EPI_ISL_923294, EPI_ISL_923298, EPI_ISL_923301, EPI_ISL_923302, EPI_ISL_923303, EPI_ISL_923304, EPI_ISL_923305, EPI_ISL_923306, EPI_ISL_923307, EPI_ISL_923308, EPI_ISL_923309, EPI_ISL_923310, EPI_ISL_923311, EPI_ISL_923373, EPI_ISL_923375, EPI_ISL_923376, EPI_ISL_923378, EPI_ISL_923390, EPI_ISL_923392, EPI_ISL_923393, EPI_ISL_923394, EPI_ISL_923395, EPI_ISL_923396, EPI_ISL_923397, EPI_ISL_923398, EPI_ISL_923399, EPI_ISL_923401, EPI_ISL_923402, EPI_ISL_923403, EPI_ISL_923404, EPI_ISL_923405, EPI_ISL_923406, EPI_ISL_923407, EPI_ISL_923408, EPI_ISL_923409, EPI_ISL_923410, EPI_ISL_923411, EPI_ISL_923412, EPI_ISL_923413, EPI_ISL_923438, EPI_ISL_923439, EPI_ISL_923539, EPI_ISL_923593, EPI_ISL_923605, EPI_ISL_923611, EPI_ISL_923613, EPI_ISL_923628, EPI_ISL_923665, EPI_ISL_923666, EPI_ISL_923667, EPI_ISL_923670, EPI_ISL_923671, EPI_ISL_923676, EPI_ISL_923678, EPI_ISL_923679, EPI_ISL_923681                                                                                                                                                                                                                                                                                                                                                                                                                                                                                                                                                                                                                                                                                                                                                                                                                                                                                                                                                                                                                                                                                                                                                                                                                                                                                                                 | see above | Centre for Enzyme Innovation, University of Portsmouth / Translational Research Laboratory, Portsmouth Hospitals NHS Trust                                                                                          | COVID-19 Genomics UK (COG-UK) Consortium                                   | Angela Beckett, Salman Goudarzi, Christopher Fearn, Kate Cook, Katie Loveson, Sharon Glaysheer, Scott Elliott, Samuel Robson                                                                                                                                                                                                                                              |
| EPI_ISL_923742, EPI_ISL_923748                                                                                                                                                                                                                                                                                                                                                                                                                                                                                                                                                                                                                                                                                                                                                                                                                                                                                                                                                                                                                                                                                                                                                                                                                                                                                                                                                                                                                                                                                                                                                                                                                                                                                                                                                                                                                                                                                                                                                                                                                                                                                                                                                                                                                                                                                                                                                                                                 |           | Department of Pathology, University of Cambridge                                                                                                                                                                    | COVID-19 Genomics UK (COG-UK) Consortium                                   | Aminu S. Jahun, Yasmin Chaudhry, Iliana Georgana, Myra Hosmillo, Rhys Izu, Martin D. Curran, Surendra Parmar, Ian Goodfellow                                                                                                                                                                                                                                              |
| EPI_ISL_924083, EPI_ISL_924091, EPI_ISL_924177, EPI_ISL_924182, EPI_ISL_924230, EPI_ISL_924270, EPI_ISL_924325                                                                                                                                                                                                                                                                                                                                                                                                                                                                                                                                                                                                                                                                                                                                                                                                                                                                                                                                                                                                                                                                                                                                                                                                                                                                                                                                                                                                                                                                                                                                                                                                                                                                                                                                                                                                                                                                                                                                                                                                                                                                                                                                                                                                                                                                                                                 |           | Virology Department, Sheffield Teaching Hospitals NHS Foundation Trust/Department of Infection, Immunity and Cardiovascular Disease, The Medical School, University of Sheffield                                    | COVID-19 Genomics UK (COG-UK) Consortium                                   | Thushan de Silva, Matthew Parker, Nikki Smith, Adri Angyal, Rebecca Brown, Luke Green, Rachel Tucker, Paul Parsons, Danielle Groves, Katie Johnson, Laura Carriero, Alex Keeley, Dave Partridge, Matthew Wyles, Benjamin Lindsey, Mehmet Yavuz, Mohammad Raza, Cariad Evans                                                                                               |
| EPI_ISL_924729, EPI_ISL_924731, EPI_ISL_924746, EPI_ISL_924749, EPI_ISL_924764, EPI_ISL_924770, EPI_ISL_924774, EPI_ISL_924794, EPI_ISL_924795, EPI_ISL_924796, EPI_ISL_924797, EPI_ISL_924798, EPI_ISL_924800, EPI_ISL_924801, EPI_ISL_924802, EPI_ISL_924803, EPI_ISL_924804, EPI_ISL_924805, EPI_ISL_924806, EPI_ISL_924807, EPI_ISL_924808, EPI_ISL_924809, EPI_ISL_924810, EPI_ISL_924811, EPI_ISL_924812, EPI_ISL_924813, EPI_ISL_924814, EPI_ISL_924815, EPI_ISL_924816, EPI_ISL_924817, EPI_ISL_924818, EPI_ISL_924819, EPI_ISL_924820, EPI_ISL_924821, EPI_ISL_924822, EPI_ISL_924823, EPI_ISL_924824, EPI_ISL_924825, EPI_ISL_924826, EPI_ISL_924827, EPI_ISL_924828, EPI_ISL_924830, EPI_ISL_924832, EPI_ISL_924834, EPI_ISL_924836, EPI_ISL_924838, EPI_ISL_924839, EPI_ISL_924841, EPI_ISL_924842, EPI_ISL_924843, EPI_ISL_924845, EPI_ISL_924846, EPI_ISL_924848, EPI_ISL_924849, EPI_ISL_924850, EPI_ISL_924851, EPI_ISL_924855, EPI_ISL_924857, EPI_ISL_924859, EPI_ISL_924860, EPI_ISL_924863, EPI_ISL_924864, EPI_ISL_924865, EPI_ISL_924867, EPI_ISL_924871, EPI_ISL_924877, EPI_ISL_924879, EPI_ISL_924880, EPI_ISL_924883, EPI_ISL_924886, EPI_ISL_924887, EPI_ISL_924890, EPI_ISL_924891, EPI_ISL_924892, EPI_ISL_924895, EPI_ISL_924899, EPI_ISL_924902, EPI_ISL_924904, EPI_ISL_924905, EPI_ISL_924907, EPI_ISL_924908, EPI_ISL_924909, EPI_ISL_924910, EPI_ISL_924911, EPI_ISL_924912, EPI_ISL_924913, EPI_ISL_924914, EPI_ISL_924915, EPI_ISL_924916, EPI_ISL_924917, EPI_ISL_924918, EPI_ISL_924919, EPI_ISL_924921, EPI_ISL_924922, EPI_ISL_924923, EPI_ISL_924924, EPI_ISL_924925, EPI_ISL_924926, EPI_ISL_924927, EPI_ISL_924928, EPI_ISL_924929, EPI_ISL_924930, EPI_ISL_924931, EPI_ISL_924933, EPI_ISL_924935, EPI_ISL_924936, EPI_ISL_924937, EPI_ISL_924938, EPI_ISL_924939, EPI_ISL_924940, EPI_ISL_924941, EPI_ISL_924942, EPI_ISL_924943, EPI_ISL_924944, EPI_ISL_924945, EPI_ISL_924946, EPI_ISL_924947, EPI_ISL_924949, EPI_ISL_924950, EPI_ISL_924952, EPI_ISL_924956, EPI_ISL_924968, EPI_ISL_924969, EPI_ISL_924972, EPI_ISL_924975, EPI_ISL_924976, EPI_ISL_924977, EPI_ISL_924978, EPI_ISL_924980, EPI_ISL_924986, EPI_ISL_924989, EPI_ISL_924990, EPI_ISL_924991, EPI_ISL_924992, EPI_ISL_924996, EPI_ISL_925000, EPI_ISL_925001, EPI_ISL_925002, EPI_ISL_925003, EPI_ISL_925005, EPI_ISL_925008, EPI_ISL_925009, EPI_ISL_925010, EPI_ISL_925011, EPI_ISL_925012, EPI_ISL_925013 | see above | Bioinformatics and Biostatistics Lab, Advanced Sequencing Facility                                                                                                                                                  | COVID-19 Genomics UK (COG-UK) Consortium                                   | Aengus Stewart, Jerome Nicod, Chelsea Sawyer, Laura Cubitt, Harshil Patel, Margaret Crawford                                                                                                                                                                                                                                                                              |
| EPI_ISL_937818                                                                                                                                                                                                                                                                                                                                                                                                                                                                                                                                                                                                                                                                                                                                                                                                                                                                                                                                                                                                                                                                                                                                                                                                                                                                                                                                                                                                                                                                                                                                                                                                                                                                                                                                                                                                                                                                                                                                                                                                                                                                                                                                                                                                                                                                                                                                                                                                                 |           | Lighthouse Lab in Alderley Park                                                                                                                                                                                     | Wellcome Sanger Institute for the COVID-19 Genomics UK (COG-UK) Consortium | Jacquelyn Wynn, Mairead Hyland, The Lighthouse Lab in Alderley Park and Alex Alderton, Roberto Amato, Sonia Goncalves, Ewan Harrison, David K. Jackson, Ian Johnston, Dominic Kwiatkowski, Cordelia Langford, John Sillitoe on behalf of the Wellcome Sanger Institute COVID-19 Surveillance Team                                                                         |
| EPI_ISL_945049, EPI_ISL_945056, EPI_ISL_945061, EPI_ISL_945072, EPI_ISL_945084, EPI_ISL_945095, EPI_ISL_945114, EPI_ISL_945115, EPI_ISL_945122, EPI_ISL_945125, EPI_ISL_945130, EPI_ISL_945142, EPI_ISL_945143, EPI_ISL_945146, EPI_ISL_945147, EPI_ISL_945152, EPI_ISL_945155, EPI_ISL_945163, EPI_ISL_945169, EPI_ISL_945181, EPI_ISL_945190, EPI_ISL_945197, EPI_ISL_945207, EPI_ISL_945208, EPI_ISL_945212, EPI_ISL_945217, EPI_ISL_945221, EPI_ISL_945236, EPI_ISL_945238, EPI_ISL_945241, EPI_ISL_945243, EPI_ISL_945244, EPI_ISL_945248, EPI_ISL_945250, EPI_ISL_945254, EPI_ISL_945275, EPI_ISL_945279, EPI_ISL_945285, EPI_ISL_945288, EPI_ISL_945297, EPI_ISL_945304, EPI_ISL_945311, EPI_ISL_945319, EPI_ISL_945324, EPI_ISL_945332, EPI_ISL_945334, EPI_ISL_945337, EPI_ISL_945345, EPI_ISL_945347, EPI_ISL_945363, EPI_ISL_945364, EPI_ISL_945366                                                                                                                                                                                                                                                                                                                                                                                                                                                                                                                                                                                                                                                                                                                                                                                                                                                                                                                                                                                                                                                                                                                                                                                                                                                                                                                                                                                                                                                                                                                                                                 | see above | Lighthouse Lab in Cambridge                                                                                                                                                                                         | Wellcome Sanger Institute for the COVID-19 Genomics UK (COG-UK) Consortium | Rob Howes, The Lighthouse Lab in Cambridge and Alex Alderton, Roberto Amato, Sonia Goncalves, Ewan Harrison, David K. Jackson, Ian Johnston, Dominic Kwiatkowski, Cordelia Langford, John Sillitoe on behalf of the Wellcome Sanger Institute COVID-19 Surveillance Team                                                                                                  |
| EPI_ISL_946701, EPI_ISL_946780                                                                                                                                                                                                                                                                                                                                                                                                                                                                                                                                                                                                                                                                                                                                                                                                                                                                                                                                                                                                                                                                                                                                                                                                                                                                                                                                                                                                                                                                                                                                                                                                                                                                                                                                                                                                                                                                                                                                                                                                                                                                                                                                                                                                                                                                                                                                                                                                 |           | Lighthouse Lab in Alderley Park                                                                                                                                                                                     | Wellcome Sanger Institute for the COVID-19 Genomics UK (COG-UK) Consortium | Jacquelyn Wynn, Mairead Hyland, The Lighthouse Lab in Alderley Park and Alex Alderton, Roberto Amato, Sonia Goncalves, Ewan Harrison, David K. Jackson, Ian Johnston, Dominic Kwiatkowski, Cordelia Langford, John Sillitoe on behalf of the Wellcome Sanger Institute COVID-19 Surveillance Team                                                                         |
| EPI_ISL_949640                                                                                                                                                                                                                                                                                                                                                                                                                                                                                                                                                                                                                                                                                                                                                                                                                                                                                                                                                                                                                                                                                                                                                                                                                                                                                                                                                                                                                                                                                                                                                                                                                                                                                                                                                                                                                                                                                                                                                                                                                                                                                                                                                                                                                                                                                                                                                                                                                 |           | Virology Department, Royal Infirmary of Edinburgh, NHS Lothian / School of Biological Sciences, University of Edinburgh / Institute of Genetics and Molecular Medicine, University of Edinburgh                     | COVID-19 Genomics UK (COG-UK) Consortium                                   | McHugh M, Dewar R, Rooke S, Gallagher M, Balcaza C, O'Toole A, Scher E, Hill V, McCrone JT, Colquhoun R, Yu X, Jackson B, Rambaut A, Williams TC, Templeton K                                                                                                                                                                                                             |
| EPI_ISL_949750, EPI_ISL_949757, EPI_ISL_949759, EPI_ISL_949760, EPI_ISL_949762, EPI_ISL_949763, EPI_ISL_949765, EPI_ISL_949766, EPI_ISL_949768, EPI_ISL_949772, EPI_ISL_949774, EPI_ISL_949776, EPI_ISL_949777, EPI_ISL_949778, EPI_ISL_949779, EPI_ISL_949780, EPI_ISL_949782, EPI_ISL_949783                                                                                                                                                                                                                                                                                                                                                                                                                                                                                                                                                                                                                                                                                                                                                                                                                                                                                                                                                                                                                                                                                                                                                                                                                                                                                                                                                                                                                                                                                                                                                                                                                                                                                                                                                                                                                                                                                                                                                                                                                                                                                                                                 | see above | Barts Health NHS Trust                                                                                                                                                                                              | COVID-19 Genomics UK (COG-UK) Consortium                                   | CUTINO-MOGUEL, Maria-Teresa; HARRINGTON, David; OWOYEMI, Dola; KULASEGARAN-SHYLINI, Raghavendran; BROAD, Claire; KELE, Beatrix                                                                                                                                                                                                                                            |
| EPI_ISL_949789, EPI_ISL_949790, EPI_ISL_950069, EPI_ISL_950070, EPI_ISL_950072, EPI_ISL_950074, EPI_ISL_950075, EPI_ISL_950077, EPI_ISL_950079, EPI_ISL_950080, EPI_ISL_950083, EPI_ISL_950084, EPI_ISL_950085, EPI_ISL_950097, EPI_ISL_950098, EPI_ISL_950100, EPI_ISL_950102, EPI_ISL_950110, EPI_ISL_950112, EPI_ISL_950115, EPI_ISL_950126, EPI_ISL_950150, EPI_ISL_950162, EPI_ISL_950163, EPI_ISL_950164, EPI_ISL_950169                                                                                                                                                                                                                                                                                                                                                                                                                                                                                                                                                                                                                                                                                                                                                                                                                                                                                                                                                                                                                                                                                                                                                                                                                                                                                                                                                                                                                                                                                                                                                                                                                                                                                                                                                                                                                                                                                                                                                                                                 | see above | University College London, Great Ormond Street Hospital for Children NHS Foundation Trust, Imperial College Healthcare NHS Trust                                                                                    | COVID-19 Genomics UK (COG-UK) Consortium                                   | Sergi Castellano, Rachel Williams, Mark Kristiansen, Paola Resende Silva, Sunando Roy, Tony Brooks, Helena Tutili, Paola Niola, Patricia Dyal, Charlotte Williams, Leysa Forrest, Yasmin Panchbhaya, Jacqueline Findlay, Samuel Weeks, Julianne Brown, Kathryn Harris, Paul Randell, James Price, Alison Holmes, Judith Breuer                                            |
| EPI_ISL_950272, EPI_ISL_950280, EPI_ISL_950282, EPI_ISL_950283, EPI_ISL_950284, EPI_ISL_950285, EPI_ISL_950289, EPI_ISL_950290, EPI_ISL_950291, EPI_ISL_950292, EPI_ISL_950293, EPI_ISL_950294, EPI_ISL_950297, EPI_ISL_950298, EPI_ISL_950304, EPI_ISL_950305, EPI_ISL_950306, EPI_ISL_950307, EPI_ISL_950308, EPI_ISL_950309, EPI_ISL_950310, EPI_ISL_950311, EPI_ISL_950312, EPI_ISL_950313, EPI_ISL_950331, EPI_ISL_950332, EPI_ISL_950333, EPI_ISL_950334, EPI_ISL_950335, EPI_ISL_950336                                                                                                                                                                                                                                                                                                                                                                                                                                                                                                                                                                                                                                                                                                                                                                                                                                                                                                                                                                                                                                                                                                                                                                                                                                                                                                                                                                                                                                                                                                                                                                                                                                                                                                                                                                                                                                                                                                                                 | see above | Northumbria University / South Tees Hospitals NHS Foundation Trust / North Cumbria Integrated Care NHS Foundation Trust / North Tees and Hartlepool NHS Foundation Trust / Newcastle Hospitals NHS Foundation Trust | COVID-19 Genomics UK (COG-UK) Consortium                                   | Darren L Smith, Andrew Nelson, Matthew Bashton, Greg R Young, Joshua Loh, John Allan, Mohammad A Tariq, Giles S Holt, Gary Black, Wen C Yew, Lynn Dover, Paul Baker, Steve Liggett, Sarah Essex, Jane Greenaway, Debra Padgett, Clive Graham, Garren Scott, Edward Barton, Emma Swindells, Brendan Payne, Jennifer Collins, Yusrî Taha, Gary Eltringham                   |
| EPI_ISL_950713                                                                                                                                                                                                                                                                                                                                                                                                                                                                                                                                                                                                                                                                                                                                                                                                                                                                                                                                                                                                                                                                                                                                                                                                                                                                                                                                                                                                                                                                                                                                                                                                                                                                                                                                                                                                                                                                                                                                                                                                                                                                                                                                                                                                                                                                                                                                                                                                                 |           | Lincolnshire Hospitals and DeepSeq Nottingham                                                                                                                                                                       | COVID-19 Genomics UK (COG-UK) Consortium                                   | Nichola Duckworth, Tim Sloan, Sarah Walsh, Jonathan Ball, Patrick McClure, Joseph Chappell, Nadine Holmes, Matthew Carlisle, Christopher Moore, Fei Sang, Johnny Debebe, Victoria Wright, Matthew Loose                                                                                                                                                                   |
| EPI_ISL_951231, EPI_ISL_951232, EPI_ISL_951239, EPI_ISL_951245, EPI_ISL_951246, EPI_ISL_951247, EPI_ISL_951248, EPI_ISL_951252, EPI_ISL_951254, EPI_ISL_951255, EPI_ISL_951256, EPI_ISL_951258, EPI_ISL_951265, EPI_ISL_951268, EPI_ISL_951269, EPI_ISL_951270, EPI_ISL_951271, EPI_ISL_951272, EPI_ISL_951273, EPI_ISL_951274, EPI_ISL_951275, EPI_ISL_951276, EPI_ISL_951277, EPI_ISL_951281, EPI_ISL_951282, EPI_ISL_951283, EPI_ISL_951286, EPI_ISL_951287, EPI_ISL_951288, EPI_ISL_951289, EPI_ISL_951290, EPI_ISL_951291, EPI_ISL_951293, EPI_ISL_951294, EPI_ISL_951297, EPI_ISL_951299, EPI_ISL_951300, EPI_ISL_951304, EPI_ISL_951308, EPI_ISL_951309, EPI_ISL_951311, EPI_ISL_951313, EPI_ISL_951316, EPI_ISL_951317, EPI_ISL_951318, EPI_ISL_951356, EPI_ISL_951362, EPI_ISL_951363, EPI_ISL_951364, EPI_ISL_951366, EPI_ISL_951367, EPI_ISL_951374, EPI_ISL_951376, EPI_ISL_951377, EPI_ISL_951383, EPI_ISL_951387, EPI_ISL_951388, EPI_ISL_951389, EPI_ISL_951391, EPI_ISL_951392, EPI_ISL_951393, EPI_ISL_951395, EPI_ISL_951396, EPI_ISL_951406, EPI_ISL_951407, EPI_ISL_951408, EPI_ISL_951409, EPI_ISL_951412, EPI_ISL_951413, EPI_ISL_951414, EPI_ISL_951415, EPI_ISL_951416, EPI_ISL_951417, EPI_ISL_951420, EPI_ISL_951421, EPI_ISL_951426, EPI_ISL_951427, EPI_ISL_951428, EPI_ISL_951439, EPI_ISL_951432, EPI_ISL_951438, EPI_ISL_951439, EPI_ISL_951442, EPI_ISL_951445, EPI_ISL_951451                                                                                                                                                                                                                                                                                                                                                                                                                                                                                                                                                                                                                                                                                                                                                                                                                                                                                                                                                                                                                 | see above | Oxford Viromics, NDM, University of Oxford; Oxford University Hospitals; Basingstoke and North Hampshire Hospital                                                                                                   | COVID-19 Genomics UK (COG-UK) Consortium                                   | Tanya Golubchik, David Bonsall, George Macintyre, Amy Trebes, Mariateresa de Cesare, Catrin Moore, Alex Mobbs, Anita Justice, Robert Shaw, Monique Andersson, Timothy Peto, Emma Wise, Nathan Moore, Jessica Lynch, Nick Cortes, Matilde Mori, Stephen Kidd, David Buck, John Todd, Christophe Fraser                                                                     |
| EPI_ISL_952381, EPI_ISL_952382, EPI_ISL_952383, EPI_ISL_952384, EPI_ISL_952388, EPI_ISL_952394, EPI_ISL_952396, EPI_ISL_952397, EPI_ISL_952400, EPI_ISL_952402, EPI_ISL_952406, EPI_ISL_952414, EPI_ISL_952419, EPI_ISL_952421, EPI_ISL_952422, EPI_ISL_952425, EPI_ISL_952426, EPI_ISL_952427, EPI_ISL_952429, EPI_ISL_952434, EPI_ISL_952559, EPI_ISL_952561, EPI_ISL_952563, EPI_ISL_952565, EPI_ISL_952566, EPI_ISL_952567, EPI_ISL_952568, EPI_ISL_952569, EPI_ISL_952570, EPI_ISL_952571, EPI_ISL_952572, EPI_ISL_952573, EPI_ISL_952574, EPI_ISL_952575, EPI_ISL_952576, EPI_ISL_952578, EPI_ISL_952580, EPI_ISL_952581, EPI_ISL_952585, EPI_ISL_952587, EPI_ISL_952588, EPI_ISL_952589, EPI_ISL_952777, EPI_ISL_952778, EPI_ISL_952779, EPI_ISL_952781, EPI_ISL_952782, EPI_ISL_952783, EPI_ISL_952784, EPI_ISL_952786, EPI_ISL_952787, EPI_ISL_952788, EPI_ISL_952790, EPI_ISL_952791, EPI_ISL_952792, EPI_ISL_952796, EPI_ISL_952797, EPI_ISL_952800, EPI_ISL_952801, EPI_ISL_952802, EPI_ISL_952803, EPI_ISL_952804, EPI_ISL_952805, EPI_ISL_952806, EPI_ISL_952807, EPI_ISL_952808, EPI_ISL_952809, EPI_ISL_952810, EPI_ISL_952811, EPI_ISL_952812, EPI_ISL_952819                                                                                                                                                                                                                                                                                                                                                                                                                                                                                                                                                                                                                                                                                                                                                                                                                                                                                                                                                                                                                                                                                                                                                                                                                                                 | see above | Centre for Enzyme Innovation, University of Portsmouth / Translational Research Laboratory, Portsmouth Hospitals NHS Trust                                                                                          | COVID-19 Genomics UK (COG-UK) Consortium                                   | Angela Beckett, Salman Goudarzi, Christopher Fearn, Kate Cook, Katie Loveson, Sharon Glaysheer, Scott Elliott, Samuel Robson                                                                                                                                                                                                                                              |

EPI\_ISL\_9530302, EPI\_ISL\_9530303, EPI\_ISL\_9530334, EPI\_ISL\_9530342, EPI\_ISL\_9531377, EPI\_ISL\_953180, EPI\_ISL\_953181, EPI\_ISL\_953182, EPI\_ISL\_953185, EPI\_ISL\_953187, EPI\_ISL\_953193, EPI\_ISL\_953199, EPI\_ISL\_953205, EPI\_ISL\_953207, EPI\_ISL\_953216, EPI\_ISL\_953217, EPI\_ISL\_953219, EPI\_ISL\_953222,

[illegible]

|                                                                                                                                                                                                                                                                                                                                                                                                                                                                                                                                                                                                                                                                                                                                                                                                                                                                                                                                                                                                |                                                                                                                                  |                                                                                                                                                                                                                                                                   |                                                                                                                                                                                                                                                                                                                                                                                                                                                                                                                                                                                                                                                                                        |
|------------------------------------------------------------------------------------------------------------------------------------------------------------------------------------------------------------------------------------------------------------------------------------------------------------------------------------------------------------------------------------------------------------------------------------------------------------------------------------------------------------------------------------------------------------------------------------------------------------------------------------------------------------------------------------------------------------------------------------------------------------------------------------------------------------------------------------------------------------------------------------------------------------------------------------------------------------------------------------------------|----------------------------------------------------------------------------------------------------------------------------------|-------------------------------------------------------------------------------------------------------------------------------------------------------------------------------------------------------------------------------------------------------------------|----------------------------------------------------------------------------------------------------------------------------------------------------------------------------------------------------------------------------------------------------------------------------------------------------------------------------------------------------------------------------------------------------------------------------------------------------------------------------------------------------------------------------------------------------------------------------------------------------------------------------------------------------------------------------------------|
| EPI_ISL_987589, EPI_ISL_987591                                                                                                                                                                                                                                                                                                                                                                                                                                                                                                                                                                                                                                                                                                                                                                                                                                                                                                                                                                 | Lighthouse Lab in Cambridge                                                                                                      | Wellcome Sanger Institute for the COVID-19 Genomics UK (COG-UK) Consortium                                                                                                                                                                                        | Rob Howes, The Lighthouse Lab in Cambridge and Alex Alderton, Roberto Amato, Sonia Goncalves, Ewan Harrison, David K. Jackson, Ian Johnston, Dominic Kwiatkowski, Cordelia Langford, John Sillitoe on behalf of the Wellcome Sanger Institute COVID-19 Surveillance Team<br>(http://www.sanger.ac.uk/covid-team)                                                                                                                                                                                                                                                                                                                                                                       |
| EPI_ISL_987592, EPI_ISL_987593, EPI_ISL_987600, EPI_ISL_987601, EPI_ISL_987608, EPI_ISL_987618, EPI_ISL_987626                                                                                                                                                                                                                                                                                                                                                                                                                                                                                                                                                                                                                                                                                                                                                                                                                                                                                 | Lighthouse Lab in Milton Keynes                                                                                                  | Wellcome Sanger Institute for the COVID-19 Genomics UK (COG-UK) Consortium                                                                                                                                                                                        | The Lighthouse Lab in Milton Keynes and Alex Alderton, Roberto Amato, Sonia Goncalves, Ewan Harrison, David K. Jackson, Ian Johnston, Dominic Kwiatkowski, Cordelia Langford, John Sillitoe on behalf of the Wellcome Sanger Institute COVID-19 Surveillance Team<br>(http://www.sanger.ac.uk/covid-team)                                                                                                                                                                                                                                                                                                                                                                              |
| EPI_ISL_987627, EPI_ISL_987628                                                                                                                                                                                                                                                                                                                                                                                                                                                                                                                                                                                                                                                                                                                                                                                                                                                                                                                                                                 | Lighthouse Lab in Cambridge                                                                                                      | Wellcome Sanger Institute for the COVID-19 Genomics UK (COG-UK) Consortium                                                                                                                                                                                        | Rob Howes, The Lighthouse Lab in Cambridge and Alex Alderton, Roberto Amato, Sonia Goncalves, Ewan Harrison, David K. Jackson, Ian Johnston, Dominic Kwiatkowski, Cordelia Langford, John Sillitoe on behalf of the Wellcome Sanger Institute COVID-19 Surveillance Team<br>(http://www.sanger.ac.uk/covid-team)                                                                                                                                                                                                                                                                                                                                                                       |
| EPI_ISL_987630                                                                                                                                                                                                                                                                                                                                                                                                                                                                                                                                                                                                                                                                                                                                                                                                                                                                                                                                                                                 | Lighthouse Lab in Milton Keynes                                                                                                  | Wellcome Sanger Institute for the COVID-19 Genomics UK (COG-UK) Consortium                                                                                                                                                                                        | The Lighthouse Lab in Milton Keynes and Alex Alderton, Roberto Amato, Sonia Goncalves, Ewan Harrison, David K. Jackson, Ian Johnston, Dominic Kwiatkowski, Cordelia Langford, John Sillitoe on behalf of the Wellcome Sanger Institute COVID-19 Surveillance Team<br>(http://www.sanger.ac.uk/covid-team)                                                                                                                                                                                                                                                                                                                                                                              |
| EPI_ISL_987631                                                                                                                                                                                                                                                                                                                                                                                                                                                                                                                                                                                                                                                                                                                                                                                                                                                                                                                                                                                 | Lighthouse Lab in Cambridge                                                                                                      | Wellcome Sanger Institute for the COVID-19 Genomics UK (COG-UK) Consortium                                                                                                                                                                                        | Rob Howes, The Lighthouse Lab in Cambridge and Alex Alderton, Roberto Amato, Sonia Goncalves, Ewan Harrison, David K. Jackson, Ian Johnston, Dominic Kwiatkowski, Cordelia Langford, John Sillitoe on behalf of the Wellcome Sanger Institute COVID-19 Surveillance Team<br>(http://www.sanger.ac.uk/covid-team)                                                                                                                                                                                                                                                                                                                                                                       |
| EPI_ISL_987632                                                                                                                                                                                                                                                                                                                                                                                                                                                                                                                                                                                                                                                                                                                                                                                                                                                                                                                                                                                 | Lighthouse Lab in Milton Keynes                                                                                                  | Wellcome Sanger Institute for the COVID-19 Genomics UK (COG-UK) Consortium                                                                                                                                                                                        | The Lighthouse Lab in Milton Keynes and Alex Alderton, Roberto Amato, Sonia Goncalves, Ewan Harrison, David K. Jackson, Ian Johnston, Dominic Kwiatkowski, Cordelia Langford, John Sillitoe on behalf of the Wellcome Sanger Institute COVID-19 Surveillance Team<br>(http://www.sanger.ac.uk/covid-team)                                                                                                                                                                                                                                                                                                                                                                              |
| EPI_ISL_987633                                                                                                                                                                                                                                                                                                                                                                                                                                                                                                                                                                                                                                                                                                                                                                                                                                                                                                                                                                                 | Lighthouse Lab in Cambridge                                                                                                      | Wellcome Sanger Institute for the COVID-19 Genomics UK (COG-UK) Consortium                                                                                                                                                                                        | Rob Howes, The Lighthouse Lab in Cambridge and Alex Alderton, Roberto Amato, Sonia Goncalves, Ewan Harrison, David K. Jackson, Ian Johnston, Dominic Kwiatkowski, Cordelia Langford, John Sillitoe on behalf of the Wellcome Sanger Institute COVID-19 Surveillance Team<br>(http://www.sanger.ac.uk/covid-team)                                                                                                                                                                                                                                                                                                                                                                       |
| EPI_ISL_987634, EPI_ISL_987635, EPI_ISL_987636                                                                                                                                                                                                                                                                                                                                                                                                                                                                                                                                                                                                                                                                                                                                                                                                                                                                                                                                                 | Lighthouse Lab in Milton Keynes                                                                                                  | Wellcome Sanger Institute for the COVID-19 Genomics UK (COG-UK) Consortium                                                                                                                                                                                        | The Lighthouse Lab in Milton Keynes and Alex Alderton, Roberto Amato, Sonia Goncalves, Ewan Harrison, David K. Jackson, Ian Johnston, Dominic Kwiatkowski, Cordelia Langford, John Sillitoe on behalf of the Wellcome Sanger Institute COVID-19 Surveillance Team<br>(http://www.sanger.ac.uk/covid-team)                                                                                                                                                                                                                                                                                                                                                                              |
| EPI_ISL_987637                                                                                                                                                                                                                                                                                                                                                                                                                                                                                                                                                                                                                                                                                                                                                                                                                                                                                                                                                                                 | Lighthouse Lab in Cambridge                                                                                                      | Wellcome Sanger Institute for the COVID-19 Genomics UK (COG-UK) Consortium                                                                                                                                                                                        | Rob Howes, The Lighthouse Lab in Cambridge and Alex Alderton, Roberto Amato, Sonia Goncalves, Ewan Harrison, David K. Jackson, Ian Johnston, Dominic Kwiatkowski, Cordelia Langford, John Sillitoe on behalf of the Wellcome Sanger Institute COVID-19 Surveillance Team<br>(http://www.sanger.ac.uk/covid-team)                                                                                                                                                                                                                                                                                                                                                                       |
| EPI_ISL_990545                                                                                                                                                                                                                                                                                                                                                                                                                                                                                                                                                                                                                                                                                                                                                                                                                                                                                                                                                                                 | Lighthouse Lab in Alderley Park                                                                                                  | Wellcome Sanger Institute for the COVID-19 Genomics UK (COG-UK) Consortium                                                                                                                                                                                        | Jacquelyn Wynn, Mairead Hyland, The Lighthouse Lab in Alderley Park and Alex Alderton, Roberto Amato, Sonia Goncalves, Ewan Harrison, David K. Jackson, Ian Johnston, Dominic Kwiatkowski, Cordelia Langford, John Sillitoe on behalf of the Wellcome Sanger Institute COVID-19 Surveillance Team                                                                                                                                                                                                                                                                                                                                                                                      |
| EPI_ISL_992647                                                                                                                                                                                                                                                                                                                                                                                                                                                                                                                                                                                                                                                                                                                                                                                                                                                                                                                                                                                 | Lighthouse Lab in Alderley Park                                                                                                  | Wellcome Sanger Institute for the COVID-19 Genomics UK (COG-UK) Consortium                                                                                                                                                                                        | Jacquelyn Wynn, Mairead Hyland, The Lighthouse Lab in Alderley Park and Alex Alderton, Roberto Amato, Sonia Goncalves, Ewan Harrison, David K. Jackson, Ian Johnston, Dominic Kwiatkowski, Cordelia Langford, John Sillitoe on behalf of the Wellcome Sanger Institute COVID-19 Surveillance Team<br>(http://www.sanger.ac.uk/covid-team)                                                                                                                                                                                                                                                                                                                                              |
| EPI_ISL_993737, EPI_ISL_993745, EPI_ISL_993748, EPI_ISL_993752, EPI_ISL_993759, EPI_ISL_993760, EPI_ISL_993764, EPI_ISL_993768, EPI_ISL_993769, EPI_ISL_993772, EPI_ISL_993773, EPI_ISL_993775, EPI_ISL_993777, EPI_ISL_993780, EPI_ISL_993781, EPI_ISL_993783, EPI_ISL_993785, EPI_ISL_993786, EPI_ISL_993788, EPI_ISL_993789, EPI_ISL_993790, EPI_ISL_993795, EPI_ISL_993800, EPI_ISL_993815, EPI_ISL_993818, EPI_ISL_993822, EPI_ISL_993825, EPI_ISL_993826, EPI_ISL_993828, EPI_ISL_993829, EPI_ISL_993834, EPI_ISL_993839, EPI_ISL_993840, EPI_ISL_993842, EPI_ISL_993845, EPI_ISL_993848, EPI_ISL_993852, EPI_ISL_993860, EPI_ISL_993862, EPI_ISL_993870, EPI_ISL_993874, EPI_ISL_993875, EPI_ISL_993876, EPI_ISL_993877, EPI_ISL_993880, EPI_ISL_993882, EPI_ISL_993883, EPI_ISL_993885, EPI_ISL_993888, EPI_ISL_993896, EPI_ISL_993897, EPI_ISL_993898, EPI_ISL_993901, EPI_ISL_993904, EPI_ISL_993905, EPI_ISL_993908, EPI_ISL_993910, EPI_ISL_993913, EPI_ISL_993917, EPI_ISL_993918 | Wellcome Sanger Institute for the COVID-19 Genomics UK (COG-UK) Consortium                                                       | The Lighthouse Lab in Milton Keynes and Alex Alderton, Roberto Amato, Sonia Goncalves, Ewan Harrison, David K. Jackson, Ian Johnston, Dominic Kwiatkowski, Cordelia Langford, John Sillitoe on behalf of the Wellcome Sanger Institute COVID-19 Surveillance Team |                                                                                                                                                                                                                                                                                                                                                                                                                                                                                                                                                                                                                                                                                        |
| see above                                                                                                                                                                                                                                                                                                                                                                                                                                                                                                                                                                                                                                                                                                                                                                                                                                                                                                                                                                                      | Lighthouse Lab in Milton Keynes                                                                                                  | Wellcome Sanger Institute for the COVID-19 Genomics UK (COG-UK) Consortium                                                                                                                                                                                        | The Lighthouse Lab in Milton Keynes and Alex Alderton, Roberto Amato, Sonia Goncalves, Ewan Harrison, David K. Jackson, Ian Johnston, Dominic Kwiatkowski, Cordelia Langford, John Sillitoe on behalf of the Wellcome Sanger Institute COVID-19 Surveillance Team                                                                                                                                                                                                                                                                                                                                                                                                                      |
| EPI_ISL_993923, EPI_ISL_993924, EPI_ISL_993929, EPI_ISL_993931, EPI_ISL_993932, EPI_ISL_993933, EPI_ISL_993935, EPI_ISL_993936, EPI_ISL_993938, EPI_ISL_993939, EPI_ISL_993940, EPI_ISL_993944, EPI_ISL_993947, EPI_ISL_993948, EPI_ISL_993950, EPI_ISL_993951, EPI_ISL_993952, EPI_ISL_993953, EPI_ISL_993958, EPI_ISL_993959, EPI_ISL_993964, EPI_ISL_993965, EPI_ISL_993970, EPI_ISL_993971, EPI_ISL_993974, EPI_ISL_993978, EPI_ISL_993985, EPI_ISL_993986, EPI_ISL_993989, EPI_ISL_993990, EPI_ISL_993993, EPI_ISL_993998, EPI_ISL_993999, EPI_ISL_994005, EPI_ISL_994012, EPI_ISL_994013, EPI_ISL_994017, EPI_ISL_994021, EPI_ISL_994023, EPI_ISL_994026, EPI_ISL_994027, EPI_ISL_994029, EPI_ISL_994030, EPI_ISL_994036, EPI_ISL_994037, EPI_ISL_994038, EPI_ISL_994041, EPI_ISL_994043, EPI_ISL_994049, EPI_ISL_994051, EPI_ISL_994054, EPI_ISL_994057, EPI_ISL_994062, EPI_ISL_994063, EPI_ISL_994065                                                                                 | Wellcome Sanger Institute for the COVID-19 Genomics UK (COG-UK) Consortium                                                       | The Lighthouse Lab in Milton Keynes and Alex Alderton, Roberto Amato, Sonia Goncalves, Ewan Harrison, David K. Jackson, Ian Johnston, Dominic Kwiatkowski, Cordelia Langford, John Sillitoe on behalf of the Wellcome Sanger Institute COVID-19 Surveillance Team |                                                                                                                                                                                                                                                                                                                                                                                                                                                                                                                                                                                                                                                                                        |
| see above                                                                                                                                                                                                                                                                                                                                                                                                                                                                                                                                                                                                                                                                                                                                                                                                                                                                                                                                                                                      | Lighthouse Lab in Milton Keynes                                                                                                  | Wellcome Sanger Institute for the COVID-19 Genomics UK (COG-UK) Consortium                                                                                                                                                                                        | The Lighthouse Lab in Milton Keynes and Alex Alderton, Roberto Amato, Sonia Goncalves, Ewan Harrison, David K. Jackson, Ian Johnston, Dominic Kwiatkowski, Cordelia Langford, John Sillitoe on behalf of the Wellcome Sanger Institute COVID-19 Surveillance Team<br>(http://www.sanger.ac.uk/covid-team)                                                                                                                                                                                                                                                                                                                                                                              |
| EPI_ISL_994649, EPI_ISL_994650                                                                                                                                                                                                                                                                                                                                                                                                                                                                                                                                                                                                                                                                                                                                                                                                                                                                                                                                                                 | Lighthouse Lab in Alderley Park                                                                                                  | Wellcome Sanger Institute for the COVID-19 Genomics UK (COG-UK) Consortium                                                                                                                                                                                        | Jacquelyn Wynn, Mairead Hyland, The Lighthouse Lab in Alderley Park and Alex Alderton, Roberto Amato, Sonia Goncalves, Ewan Harrison, David K. Jackson, Ian Johnston, Dominic Kwiatkowski, Cordelia Langford, John Sillitoe on behalf of the Wellcome Sanger Institute COVID-19 Surveillance Team                                                                                                                                                                                                                                                                                                                                                                                      |
| EPI_ISL_996427, EPI_ISL_996428, EPI_ISL_996429, EPI_ISL_996430, EPI_ISL_996431, EPI_ISL_996432, EPI_ISL_996436, EPI_ISL_996453                                                                                                                                                                                                                                                                                                                                                                                                                                                                                                                                                                                                                                                                                                                                                                                                                                                                 | University of Birmingham                                                                                                         | COVID-19 Genomics UK (COG-UK) Consortium                                                                                                                                                                                                                          | Institute of Microbiology, University of Birmingham: Claire McMurray, Joanne Stockton, Samuel Nicholls, Radoslaw Poplawski, Will Rowe, Josh Quick, Nicholas Loman, University of Birmingham Testing Laboratory: Celina M Whalley, Andrew Bosworth, Charlotte Poxon, Kasun Wanigasooriya, Oliver Pickles, Mike Kidd, Alex Richter, Andrew D Beggs PHE Heartlands Lab: Husam Osman, Andrew Bosworth. Queen Elizabeth Hospital: Anna Casey                                                                                                                                                                                                                                                |
| EPI_ISL_996514, EPI_ISL_996515, EPI_ISL_996516, EPI_ISL_996517, EPI_ISL_996518, EPI_ISL_996519, EPI_ISL_996520, EPI_ISL_996522, EPI_ISL_996523, EPI_ISL_996524, EPI_ISL_996525, EPI_ISL_996526, EPI_ISL_996531, EPI_ISL_996535, EPI_ISL_996580, EPI_ISL_996581, EPI_ISL_996583, EPI_ISL_996584, EPI_ISL_996592, EPI_ISL_996594                                                                                                                                                                                                                                                                                                                                                                                                                                                                                                                                                                                                                                                                 | University of Exeter                                                                                                             | COVID-19 Genomics UK (COG-UK) Consortium                                                                                                                                                                                                                          | Ben Temperton, Aaron Jeffries, Michelle Michelsen, Joanna Warwick-Dugdale, Audrey Farbos, Robyn Manley, Stephen Michell, Jane Masoli                                                                                                                                                                                                                                                                                                                                                                                                                                                                                                                                                   |
| EPI_ISL_997074                                                                                                                                                                                                                                                                                                                                                                                                                                                                                                                                                                                                                                                                                                                                                                                                                                                                                                                                                                                 | Virology Department, Royal Infirmary of Edinburgh, NHS Lothian / School of Biological Sciences, University of Edinburgh          | COVID-19 Genomics UK (COG-UK) Consortium                                                                                                                                                                                                                          | McHugh M, Dewar R, Cotton S, Rooke S, O'Toole A, Scher E, Hill V, McCrone JT, Colquhoun R, Yu X, Jackson B, Rambaut A, Templeton K                                                                                                                                                                                                                                                                                                                                                                                                                                                                                                                                                     |
| EPI_ISL_997326, EPI_ISL_997327                                                                                                                                                                                                                                                                                                                                                                                                                                                                                                                                                                                                                                                                                                                                                                                                                                                                                                                                                                 | University of Exeter                                                                                                             | COVID-19 Genomics UK (COG-UK) Consortium                                                                                                                                                                                                                          | Ben Temperton, Aaron Jeffries, Michelle Michelsen, Joanna Warwick-Dugdale, Audrey Farbos, Robyn Manley, Stephen Michell, Jane Masoli                                                                                                                                                                                                                                                                                                                                                                                                                                                                                                                                                   |
| EPI_ISL_997377, EPI_ISL_997384, EPI_ISL_997385, EPI_ISL_997386, EPI_ISL_997387, EPI_ISL_997388, EPI_ISL_997389, EPI_ISL_997390, EPI_ISL_997391, EPI_ISL_997392                                                                                                                                                                                                                                                                                                                                                                                                                                                                                                                                                                                                                                                                                                                                                                                                                                 | Liverpool Clinical Laboratories                                                                                                  | COVID-19 Genomics UK (COG-UK) Consortium                                                                                                                                                                                                                          | Sam Haldenby, Anita Lucaci, Steve Paterson, Julian Hiscox, Alistair Darby, M Almsaud, A Alrezaihi, Muhannad Alruwaili, Stuart D Armstrong, Jones Benjamin, Eleanor G Bentley, Anu Chawla, Jordan J Clark, Angela Cowell, Richard Eccles, Isabel Garcia-Dorival, Matthew Gemmell, Alessandro Gerada, PKF Gilmore, Richard Gregory, Ximeng Han, Catherine Hartley, Margaret Hughes, Miren Ituriza-Gomara, James Johnson, L Luu, Jenifer Manson, Charlotte Nelson, Elaine O'Toole, Cassie Olateju, Rebekah Penrice-Randal, Lucille Rainbow, N.P Randle, Trevor Ian Robinson, Parul Sharma, Ghada T Shawli, James P Stewart, Neil Swainston, Ecaterina Vamos, Joanne Watts, Mark Whitehead |
| EPI_ISL_997629, EPI_ISL_997675, EPI_ISL_997676                                                                                                                                                                                                                                                                                                                                                                                                                                                                                                                                                                                                                                                                                                                                                                                                                                                                                                                                                 | Barts Health NHS Trust                                                                                                           | COVID-19 Genomics UK (COG-UK) Consortium                                                                                                                                                                                                                          | CUTINO-MOGUEL, Maria-Teresa; HARRINGTON, David; OWOYEMI, Dola; KULASEGARAN-SHYLINI, Raghavendran; BROAD, Claire; KELE, Beatrix                                                                                                                                                                                                                                                                                                                                                                                                                                                                                                                                                         |
| EPI_ISL_997839, EPI_ISL_997842                                                                                                                                                                                                                                                                                                                                                                                                                                                                                                                                                                                                                                                                                                                                                                                                                                                                                                                                                                 | University College London, Great Ormond Street Hospital for Children NHS Foundation Trust, Imperial College Healthcare NHS Trust | COVID-19 Genomics UK (COG-UK) Consortium                                                                                                                                                                                                                          | Sergi Castellano, Rachel Williams, Mark Kristiansen, Paola Resende Silva, Sunando Roy, Tony Brooks, Helena Tutill, Paola Niola, Patricia Dyal, Charlotte Williams, Leysa Forrest, Yasmin Panchbhaya, Jacqueline Findlay, Samuel Weeks, Julianne Brown, Kathryn Harris, Paul Randell, James Price, Alison Holmes, Judith Breuer                                                                                                                                                                                                                                                                                                                                                         |
| EPI_ISL_998136, EPI_ISL_998140, EPI_ISL_998144, EPI_ISL_998154, EPI_ISL_998155, EPI_ISL_998158, EPI_ISL_998159, EPI_ISL_998163, EPI_ISL_998189, EPI_ISL_998190, EPI_ISL_998191, EPI_ISL_998192, EPI_ISL_998193, EPI_ISL_998194, EPI_ISL_998195, EPI_ISL_998196, EPI_ISL_998198, EPI_ISL_998200                                                                                                                                                                                                                                                                                                                                                                                                                                                                                                                                                                                                                                                                                                 | Regional Virus Laboratory, Belfast Health and Social Care Trust                                                                  | COVID-19 Genomics UK (COG-UK) Consortium                                                                                                                                                                                                                          | Conall McCaughey, James McKenna, Tanya Curran, Susan Feeney, Alison Watt, Ciara Cox, Mairead Connor, Zoltan Molnar, David Simpson, Derek Fairley                                                                                                                                                                                                                                                                                                                                                                                                                                                                                                                                       |
| EPI_ISL_998830, EPI_ISL_998832                                                                                                                                                                                                                                                                                                                                                                                                                                                                                                                                                                                                                                                                                                                                                                                                                                                                                                                                                                 | Quadram Institute Bioscience                                                                                                     | COVID-19 Genomics UK (COG-UK) Consortium                                                                                                                                                                                                                          | Dave J. Baker, Gemma L. Kay, Alp Aydin, Thanh Le-Viet, Steven Rudder, Ana P. Tedim, Anastasia Kolyva, Maria Diaz, Leonardo de Oliveira Martins,                                                                                                                                                                                                                                                                                                                                                                                                                                                                                                                                        |

|                                                                                                                                                                                                                                                                                                                                                                                                                                                                                                                                                                                                                                                                                                                                                                                                                                                                                                                                                                                                                                                                                                                                                                                                                                                                                                                                                                                                                                                                                                                                                                |                                                                                                                   |                                                                           |                                                                                                                                                                                                                                                                                                                                                                          |
|----------------------------------------------------------------------------------------------------------------------------------------------------------------------------------------------------------------------------------------------------------------------------------------------------------------------------------------------------------------------------------------------------------------------------------------------------------------------------------------------------------------------------------------------------------------------------------------------------------------------------------------------------------------------------------------------------------------------------------------------------------------------------------------------------------------------------------------------------------------------------------------------------------------------------------------------------------------------------------------------------------------------------------------------------------------------------------------------------------------------------------------------------------------------------------------------------------------------------------------------------------------------------------------------------------------------------------------------------------------------------------------------------------------------------------------------------------------------------------------------------------------------------------------------------------------|-------------------------------------------------------------------------------------------------------------------|---------------------------------------------------------------------------|--------------------------------------------------------------------------------------------------------------------------------------------------------------------------------------------------------------------------------------------------------------------------------------------------------------------------------------------------------------------------|
| EPI_ISL_998938, EPI_ISL_998939, EPI_ISL_998940, EPI_ISL_998941, EPI_ISL_998942, EPI_ISL_998943, EPI_ISL_998944, EPI_ISL_998945, EPI_ISL_998946, EPI_ISL_998947, EPI_ISL_998948                                                                                                                                                                                                                                                                                                                                                                                                                                                                                                                                                                                                                                                                                                                                                                                                                                                                                                                                                                                                                                                                                                                                                                                                                                                                                                                                                                                 |                                                                                                                   |                                                                           |                                                                                                                                                                                                                                                                                                                                                                          |
| see above                                                                                                                                                                                                                                                                                                                                                                                                                                                                                                                                                                                                                                                                                                                                                                                                                                                                                                                                                                                                                                                                                                                                                                                                                                                                                                                                                                                                                                                                                                                                                      | Lincolnshire Hospitals and DeepSeq Nottingham                                                                     | COVID-19 Genomics UK (COG-UK) Consortium                                  | Nichola Duckworth, Tim Sloan, Sarah Walsh, Jonathan Ball, Patrick McClure, Joeseeph Chappell, Nadine Holmes, Matthew Carlisle, Christopher Moore, Fei Sang, Johnny Debebe, Victoria Wright, Matthew Loose                                                                                                                                                                |
| EPI_ISL_999033, EPI_ISL_999034, EPI_ISL_999035, EPI_ISL_999036, EPI_ISL_999038, EPI_ISL_999039, EPI_ISL_999040, EPI_ISL_999041, EPI_ISL_999042, EPI_ISL_999044, EPI_ISL_999045, EPI_ISL_999048, EPI_ISL_999049, EPI_ISL_999050, EPI_ISL_999059, EPI_ISL_999060, EPI_ISL_999061, EPI_ISL_999062, EPI_ISL_999064, EPI_ISL_999065, EPI_ISL_999066, EPI_ISL_999067, EPI_ISL_999076, EPI_ISL_999077, EPI_ISL_999078, EPI_ISL_999080, EPI_ISL_999087, EPI_ISL_999088, EPI_ISL_999089, EPI_ISL_999093, EPI_ISL_999094, EPI_ISL_999095, EPI_ISL_999113, EPI_ISL_999114, EPI_ISL_999115, EPI_ISL_999116, EPI_ISL_999121, EPI_ISL_999122, EPI_ISL_999123, EPI_ISL_999127, EPI_ISL_999128, EPI_ISL_999129, EPI_ISL_999133, EPI_ISL_999148, EPI_ISL_999199, EPI_ISL_999207, EPI_ISL_999208, EPI_ISL_999210, EPI_ISL_999211, EPI_ISL_999212, EPI_ISL_999364, EPI_ISL_999365, EPI_ISL_999368, EPI_ISL_999369, EPI_ISL_999370, EPI_ISL_999371, EPI_ISL_999372, EPI_ISL_999373, EPI_ISL_999374, EPI_ISL_999377, EPI_ISL_999378, EPI_ISL_999379, EPI_ISL_999381, EPI_ISL_999382, EPI_ISL_999383, EPI_ISL_999384, EPI_ISL_999385, EPI_ISL_999388, EPI_ISL_999390, EPI_ISL_999391, EPI_ISL_999392, EPI_ISL_999393, EPI_ISL_999394, EPI_ISL_999395, EPI_ISL_999396, EPI_ISL_999397, EPI_ISL_999399, EPI_ISL_999403, EPI_ISL_999428, EPI_ISL_999431, EPI_ISL_999432, EPI_ISL_999433, EPI_ISL_999434, EPI_ISL_999446, EPI_ISL_999447, EPI_ISL_999449, EPI_ISL_999452, EPI_ISL_999455, EPI_ISL_999456, EPI_ISL_999457, EPI_ISL_999458, EPI_ISL_999460, EPI_ISL_999471, EPI_ISL_999513 |                                                                                                                   |                                                                           |                                                                                                                                                                                                                                                                                                                                                                          |
| see above                                                                                                                                                                                                                                                                                                                                                                                                                                                                                                                                                                                                                                                                                                                                                                                                                                                                                                                                                                                                                                                                                                                                                                                                                                                                                                                                                                                                                                                                                                                                                      | Oxford Viromics, NDM, University of Oxford; Oxford University Hospitals; Basingstoke and North Hampshire Hospital | COVID-19 Genomics UK (COG-UK) Consortium                                  | Tanya Golubchik, David Bonsall, George Macintyre, Amy Trebes, Mariateresa de Cesare, Catrin Moore, Alex Mobbs, Anita Justice, Robert Shaw, Monique Andersson, Timothy Peto, Emma Wise, Nathan Moore, Jessica Lynch, Nick Cortes, Matilde Mori, Stephen Kidd, David Buck, John Todd, Christophe Fraser                                                                    |
| EPI_ISL_999515                                                                                                                                                                                                                                                                                                                                                                                                                                                                                                                                                                                                                                                                                                                                                                                                                                                                                                                                                                                                                                                                                                                                                                                                                                                                                                                                                                                                                                                                                                                                                 | Originating lab: Wales Specialist Virology Centre Sequencing lab: Pathogen Genomics Unit                          | Public Health Wales Microbiology Cardiff Wales Specialist Virology Centre | Catherine Moore, Johnathan Evans, Laura Gifford, Malorie Perry, Simon Cottrell, Angela Marchbank, Alec Birchley, Alexander Adams, Amy Gaskin, Bree Gatica-Wilcox, Jason Coombes, Joel Southgate, Lauren Gilbert, Lee Graham, Nicole Pacchiarini, Sara Kumziene-Summerhayes, Sarah Taylor, Sophie Jones, Sara Rey, Matthew Bull, Joanne Watkins, Sally Corden, Tom Connor |
| EPI_ISL_999985                                                                                                                                                                                                                                                                                                                                                                                                                                                                                                                                                                                                                                                                                                                                                                                                                                                                                                                                                                                                                                                                                                                                                                                                                                                                                                                                                                                                                                                                                                                                                 | Wales Specialist Virology Centre Sequencing lab: Pathogen Genomics Unit                                           | Public Health Wales Microbiology Cardiff Wales Specialist Virology Centre | Catherine Moore, Johnathan Evans, Laura Gifford, Malorie Perry, Simon Cottrell, Angela Marchbank, Alec Birchley, Alexander Adams, Amy Gaskin, Bree Gatica-Wilcox, Jason Coombes, Joel Southgate, Lauren Gilbert, Lee Graham, Nicole Pacchiarini, Sara Kumziene-Summerhayes, Sarah Taylor, Sophie Jones, Sara Rey, Matthew Bull, Joanne Watkins, Sally Corden, Tom Connor |
