# Supplementary material for: Rapid evaluation of COVID-19 vaccine effectiveness against VOC/VOIs by genetic mismatch
Source: bioRxiv or medRxiv preprint supplement (doi:10.1101/2021.04.22.21254079), 2021-11-26
Supplement: Supplementary file [file media-2.zip]

We gratefully acknowledge the following Authors from the Originating laboratories responsible for obtaining the specimens, as well as the Submitting laboratories where the genome data were generated and shared via GISAID, on which this research is based.

All Submitters of data may be contacted directly via [www.gisaid.org](http://www.gisaid.org)

Authors are sorted alphabetically.

| Accession ID                                                                                                                                                                                                                                                                                                                                                                                                                                                                                                                                                                                                                                                                                                                                                                                                                                                                                                                                                                                                                                                                                                                                                                                                                                                           | Originating Laboratory                           | Submitting Laboratory                                      | Authors                                                                                                  |
|------------------------------------------------------------------------------------------------------------------------------------------------------------------------------------------------------------------------------------------------------------------------------------------------------------------------------------------------------------------------------------------------------------------------------------------------------------------------------------------------------------------------------------------------------------------------------------------------------------------------------------------------------------------------------------------------------------------------------------------------------------------------------------------------------------------------------------------------------------------------------------------------------------------------------------------------------------------------------------------------------------------------------------------------------------------------------------------------------------------------------------------------------------------------------------------------------------------------------------------------------------------------|--------------------------------------------------|------------------------------------------------------------|----------------------------------------------------------------------------------------------------------|
| EPI_ISL_1005491, EPI_ISL_1005492, EPI_ISL_1005493, EPI_ISL_1005494                                                                                                                                                                                                                                                                                                                                                                                                                                                                                                                                                                                                                                                                                                                                                                                                                                                                                                                                                                                                                                                                                                                                                                                                     | USC Clinical Lab                                 | Los Angeles County PHL                                     | P. Hemarajata et al.                                                                                     |
| EPI_ISL_1005583, EPI_ISL_1005584, EPI_ISL_1005585, EPI_ISL_1005586, EPI_ISL_1005587, EPI_ISL_1005588, EPI_ISL_1005589, EPI_ISL_1005590, EPI_ISL_1005591, EPI_ISL_1005592, EPI_ISL_1005593, EPI_ISL_1005594, EPI_ISL_1005595, EPI_ISL_1005596, EPI_ISL_1005597, EPI_ISL_1005598, EPI_ISL_1005599, EPI_ISL_1005600, EPI_ISL_1005601, EPI_ISL_1005602, EPI_ISL_1005603, EPI_ISL_1005604, EPI_ISL_1005605, EPI_ISL_1005606, EPI_ISL_1005607, EPI_ISL_1005608, EPI_ISL_1005609, EPI_ISL_1005610, EPI_ISL_1005611, EPI_ISL_1005612, EPI_ISL_1005613, EPI_ISL_1005614, EPI_ISL_1005615, EPI_ISL_1005616, EPI_ISL_1005617, EPI_ISL_1005618, EPI_ISL_1005619, EPI_ISL_1005620, EPI_ISL_1005621, EPI_ISL_1005622, EPI_ISL_1005623, EPI_ISL_1005624, EPI_ISL_1005625, EPI_ISL_1005626, EPI_ISL_1005627, EPI_ISL_1005628, EPI_ISL_1005629, EPI_ISL_1005630, EPI_ISL_1005631, EPI_ISL_1005632, EPI_ISL_1005633, EPI_ISL_1005634, EPI_ISL_1005635, EPI_ISL_1005636, EPI_ISL_1005637, EPI_ISL_1005638, EPI_ISL_1005639, EPI_ISL_1005640, EPI_ISL_1005641, EPI_ISL_1005642, EPI_ISL_1005643, EPI_ISL_1005644, EPI_ISL_1005645, EPI_ISL_1005646, EPI_ISL_1005647, EPI_ISL_1005648, EPI_ISL_1005649, EPI_ISL_1005650, EPI_ISL_1005651, EPI_ISL_1005652, EPI_ISL_1005653, EPI_ISL_1005654 | Fulgent Genetics                                 | Fulgent Genetics                                           | Harry Gao, Mickey Li, John Gao, Joseph Fierro, Benafsh Sapra, Becky Tsai, Yan Meng, Doreen Ng, James Xie |
| see above                                                                                                                                                                                                                                                                                                                                                                                                                                                                                                                                                                                                                                                                                                                                                                                                                                                                                                                                                                                                                                                                                                                                                                                                                                                              | Providence Saint Joseph Medical Center - Burbank | Providence St. Joseph Health Molecular Genomics Laboratory | Alexa K Dowdell, Brian D Piening, Fred L Robinson, Carlo B Bifulco, Mary Campbell                        |
| EPI_ISL_1017051                                                                                                                                                                                                                                                                                                                                                                                                                                                                                                                                                                                                                                                                                                                                                                                                                                                                                                                                                                                                                                                                                                                                                                                                                                                        | Providence Saint Joseph Medical Center - Burbank | Providence St. Joseph Health Molecular Genomics Laboratory | Alexa K Dowdell, Brian D Piening, Fred L Robinson, Carlo B Bifulco, Mary Campbell                        |
| EPI_ISL_1017058                                                                                                                                                                                                                                                                                                                                                                                                                                                                                                                                                                                                                                                                                                                                                                                                                                                                                                                                                                                                                                                                                                                                                                                                                                                        | Providence Saint Joseph Medical Center - Burbank | Providence St. Joseph Health Molecular Genomics Laboratory | Alexa K Dowdell, Brian D Piening, Fred L Robinson, Carlo B Bifulco, Mary Campbell                        |
| EPI_ISL_1017059, EPI_ISL_1017060, EPI_ISL_1017061, EPI_ISL_1017062, EPI_ISL_1017063, EPI_ISL_1017065                                                                                                                                                                                                                                                                                                                                                                                                                                                                                                                                                                                                                                                                                                                                                                                                                                                                                                                                                                                                                                                                                                                                                                   | Providence Saint Joseph Medical Center - Burbank | Providence St. Joseph Health Molecular Genomics Laboratory | Alexa K Dowdell, Brian D Piening, Fred L Robinson, Carlo B Bifulco, Mary Campbell                        |
| EPI_ISL_1017080, EPI_ISL_1017081, EPI_ISL_1017082, EPI_ISL_1017083, EPI_ISL_1017084, EPI_ISL_1017085, EPI_ISL_1017086, EPI_ISL_1017087, EPI_ISL_1017088, EPI_ISL_1017089, EPI_ISL_1017091, EPI_ISL_1017092, EPI_ISL_1017093, EPI_ISL_1017094, EPI_ISL_1017095                                                                                                                                                                                                                                                                                                                                                                                                                                                                                                                                                                                                                                                                                                                                                                                                                                                                                                                                                                                                          | Providence Saint Joseph Medical Center - Burbank | Providence St. Joseph Health Molecular Genomics Laboratory | Alexa K Dowdell, Brian D Piening, Fred L Robinson, Carlo B Bifulco, Mary Campbell                        |
| see above                                                                                                                                                                                                                                                                                                                                                                                                                                                                                                                                                                                                                                                                                                                                                                                                                                                                                                                                                                                                                                                                                                                                                                                                                                                              | Providence Saint Joseph Medical Center - Burbank | Providence St. Joseph Health Molecular Genomics Laboratory | Alexa K Dowdell, Brian D Piening, Fred L Robinson, Carlo B Bifulco, Mary Campbell                        |
| EPI_ISL_1017097, EPI_ISL_1017098, EPI_ISL_1017099                                                                                                                                                                                                                                                                                                                                                                                                                                                                                                                                                                                                                                                                                                                                                                                                                                                                                                                                                                                                                                                                                                                                                                                                                      | Providence Saint Joseph Medical Center - Burbank | Providence St. Joseph Health Molecular Genomics Laboratory | Alexa K Dowdell, Brian D Piening, Fred L Robinson, Carlo B Bifulco, Mary Campbell                        |
| EPI_ISL_1017106                                                                                                                                                                                                                                                                                                                                                                                                                                                                                                                                                                                                                                                                                                                                                                                                                                                                                                                                                                                                                                                                                                                                                                                                                                                        | Providence Saint Joseph Medical Center - Burbank | Providence St. Joseph Health Molecular Genomics Laboratory | Alexa K Dowdell, Brian D Piening, Fred L Robinson, Carlo B Bifulco, Mary Campbell                        |
| EPI_ISL_1017108, EPI_ISL_1017109, EPI_ISL_1017110, EPI_ISL_1017111, EPI_ISL_1017116, EPI_ISL_1017117                                                                                                                                                                                                                                                                                                                                                                                                                                                                                                                                                                                                                                                                                                                                                                                                                                                                                                                                                                                                                                                                                                                                                                   | Providence Saint Joseph Medical Center - Burbank | Providence St. Joseph Health Molecular Genomics Laboratory | Alexa K Dowdell, Brian D Piening, Fred L Robinson, Carlo B Bifulco, Mary Campbell                        |
| EPI_ISL_1017118, EPI_ISL_1017119                                                                                                                                                                                                                                                                                                                                                                                                                                                                                                                                                                                                                                                                                                                                                                                                                                                                                                                                                                                                                                                                                                                                                                                                                                       | Providence Saint Joseph Medical Center - Burbank | Providence St. Joseph Health Molecular Genomics Laboratory | Alexa K Dowdell, Brian D Piening, Fred L Robinson, Carlo B Bifulco, Mary Campbell                        |
| EPI_ISL_1017126, EPI_ISL_1017127, EPI_ISL_1017128, EPI_ISL_1017129, EPI_ISL_1017130, EPI_ISL_1017131, EPI_ISL_1017132                                                                                                                                                                                                                                                                                                                                                                                                                                                                                                                                                                                                                                                                                                                                                                                                                                                                                                                                                                                                                                                                                                                                                  | Providence Saint Joseph Medical Center - Burbank | Providence St. Joseph Health Molecular Genomics Laboratory | Alexa K Dowdell, Brian D Piening, Fred L Robinson, Carlo B Bifulco, Mary Campbell                        |
| EPI_ISL_1017133, EPI_ISL_1017134, EPI_ISL_1017135, EPI_ISL_1017136, EPI_ISL_1017137, EPI_ISL_1017138, EPI_ISL_1017139, EPI_ISL_1017140, EPI_ISL_1017141, EPI_ISL_1017142, EPI_ISL_1017143, EPI_ISL_1017144, EPI_ISL_1017145, EPI_ISL_1017146                                                                                                                                                                                                                                                                                                                                                                                                                                                                                                                                                                                                                                                                                                                                                                                                                                                                                                                                                                                                                           | Providence Saint Joseph Medical Center - Burbank | Providence St. Joseph Health Molecular Genomics Laboratory | Alexa K Dowdell, Brian D Piening, Fred L Robinson, Carlo B Bifulco, Mary Campbell                        |
| see above                                                                                                                                                                                                                                                                                                                                                                                                                                                                                                                                                                                                                                                                                                                                                                                                                                                                                                                                                                                                                                                                                                                                                                                                                                                              | Providence Saint Joseph Medical Center - Burbank | Providence St. Joseph Health Molecular Genomics Laboratory | Alexa K Dowdell, Brian D Piening, Fred L Robinson, Carlo B Bifulco, Mary Campbell                        |
| EPI_ISL_1017147, EPI_ISL_1017148, EPI_ISL_1017149, EPI_ISL_1017150, EPI_ISL_1017151, EPI_ISL_1017152, EPI_ISL_1017153, EPI_ISL_1017154, EPI_ISL_1017155, EPI_ISL_1017156, EPI_ISL_1017157, EPI_ISL_1017158, EPI_ISL_1017159, EPI_ISL_1017160                                                                                                                                                                                                                                                                                                                                                                                                                                                                                                                                                                                                                                                                                                                                                                                                                                                                                                                                                                                                                           | Providence Saint Joseph Medical Center - Burbank | Providence St. Joseph Health Molecular Genomics Laboratory | Alexa K Dowdell, Brian D Piening, Fred L Robinson, Carlo B Bifulco, Mary Campbell                        |
| see above                                                                                                                                                                                                                                                                                                                                                                                                                                                                                                                                                                                                                                                                                                                                                                                                                                                                                                                                                                                                                                                                                                                                                                                                                                                              | Providence Saint Joseph Medical Center - Burbank | Providence St. Joseph Health Molecular Genomics Laboratory | Alexa K Dowdell, Brian D Piening, Fred L Robinson, Carlo B Bifulco, Mary Campbell                        |
| EPI_ISL_1027178, EPI_ISL_1027179, EPI_ISL_1027180, EPI_ISL_1027181, EPI_ISL_1027182, EPI_ISL_1027183, EPI_ISL_1027184, EPI_ISL_1027185, EPI_ISL_1027186, EPI_ISL_1027187, EPI_ISL_1027188, EPI_ISL_1027189, EPI_ISL_1027190, EPI_ISL_1027191, EPI_ISL_1027192, EPI_ISL_1027193, EPI_ISL_1027194, EPI_ISL_1027195, EPI_ISL_1027196, EPI_ISL_1027197, EPI_ISL_1027198, EPI_ISL_1027199, EPI_ISL_1027200, EPI_ISL_1027201, EPI_ISL_1027202, EPI_ISL_1027203, EPI_ISL_1027204, EPI_ISL_1027205, EPI_ISL_1027206, EPI_ISL_1027207, EPI_ISL_1027208, EPI_ISL_1027209, EPI_ISL_1027210, EPI_ISL_1027211, EPI_ISL_1027212, EPI_ISL_1027213, EPI_ISL_1027214, EPI_ISL_1027215, EPI_ISL_1027216, EPI_ISL_1027217, EPI_ISL_1027218, EPI_ISL_1027219, EPI_ISL_1027220, EPI_ISL_1027221, EPI_ISL_1027222, EPI_ISL_1027223, EPI_ISL_1027224, EPI_ISL_1027225, EPI_ISL_1027226, EPI_ISL_1027227, EPI_ISL_1027228, EPI_ISL_1027229, EPI_ISL_1027230, EPI_ISL_1027231, EPI_ISL_1027232, EPI_ISL_1027233, EPI_ISL_1027234, EPI_ISL_1027235, EPI_ISL_1027236, EPI_ISL_1027237, EPI_ISL_1027238, EPI_ISL_1027239, EPI_ISL_1027240, EPI_ISL_1027241, EPI_ISL_1027242, EPI_ISL_1027243, EPI_ISL_1027244, EPI_ISL_1027245, EPI_ISL_1027246, EPI_ISL_1027247                                   | Fulgent Genetics                                 | Fulgent Genetics                                           | Harry Gao, Mickey Li, John Gao, Joseph Fierro, Benafsh Sapra, Becky Tsai, Yan Meng, Doreen Ng, James Xie |
| see above                                                                                                                                                                                                                                                                                                                                                                                                                                                                                                                                                                                                                                                                                                                                                                                                                                                                                                                                                                                                                                                                                                                                                                                                                                                              | Santa Clara County Public Health Laboratory      | Chan-Zuckerberg Biohub                                     | CZB Cliahub Consortium                                                                                   |
| EPI_ISL_1027293                                                                                                                                                                                                                                                                                                                                                                                                                                                                                                                                                                                                                                                                                                                                                                                                                                                                                                                                                                                                                                                                                                                                                                                                                                                        | Orange County Public Health Lab                  | Chan-Zuckerberg Biohub                                     | CZB Cliahub Consortium                                                                                   |
| EPI_ISL_1027294                                                                                                                                                                                                                                                                                                                                                                                                                                                                                                                                                                                                                                                                                                                                                                                                                                                                                                                                                                                                                                                                                                                                                                                                                                                        | Alameda County Public Health Lab                 | Chan-Zuckerberg Biohub                                     | CZB Cliahub Consortium                                                                                   |
| EPI_ISL_1027296, EPI_ISL_1027303                                                                                                                                                                                                                                                                                                                                                                                                                                                                                                                                                                                                                                                                                                                                                                                                                                                                                                                                                                                                                                                                                                                                                                                                                                       | Santa Clara County Public Health Laboratory      | Chan-Zuckerberg Biohub                                     | CZB Cliahub Consortium                                                                                   |
| EPI_ISL_1027306                                                                                                                                                                                                                                                                                                                                                                                                                                                                                                                                                                                                                                                                                                                                                                                                                                                                                                                                                                                                                                                                                                                                                                                                                                                        | Alameda County Public Health Lab                 | Chan-Zuckerberg Biohub                                     | CZB Cliahub Consortium                                                                                   |
| EPI_ISL_1027307, EPI_ISL_1027308, EPI_ISL_1027309                                                                                                                                                                                                                                                                                                                                                                                                                                                                                                                                                                                                                                                                                                                                                                                                                                                                                                                                                                                                                                                                                                                                                                                                                      | Santa Clara County Public Health Laboratory      | Chan-Zuckerberg Biohub                                     | CZB Cliahub Consortium                                                                                   |
| EPI_ISL_1027312, EPI_ISL_1027314, EPI_ISL_1027315, EPI_ISL_1027317, EPI_ISL_1027319, EPI_ISL_1027320                                                                                                                                                                                                                                                                                                                                                                                                                                                                                                                                                                                                                                                                                                                                                                                                                                                                                                                                                                                                                                                                                                                                                                   | Orange County Public Health Lab                  | Chan-Zuckerberg Biohub                                     | CZB Cliahub Consortium                                                                                   |
| EPI_ISL_1027321                                                                                                                                                                                                                                                                                                                                                                                                                                                                                                                                                                                                                                                                                                                                                                                                                                                                                                                                                                                                                                                                                                                                                                                                                                                        | Alameda County Public Health Lab                 | Chan-Zuckerberg Biohub                                     | CZB Cliahub Consortium                                                                                   |
| EPI_ISL_1027323, EPI_ISL_1027324                                                                                                                                                                                                                                                                                                                                                                                                                                                                                                                                                                                                                                                                                                                                                                                                                                                                                                                                                                                                                                                                                                                                                                                                                                       | Santa Clara County Public Health Laboratory      | Chan-Zuckerberg Biohub                                     | CZB Cliahub Consortium                                                                                   |
| EPI_ISL_1027325, EPI_ISL_1027326, EPI_ISL_1027327                                                                                                                                                                                                                                                                                                                                                                                                                                                                                                                                                                                                                                                                                                                                                                                                                                                                                                                                                                                                                                                                                                                                                                                                                      | Orange County Public Health Lab                  | Chan-Zuckerberg Biohub                                     | CZB Cliahub Consortium                                                                                   |
| EPI_ISL_1027329                                                                                                                                                                                                                                                                                                                                                                                                                                                                                                                                                                                                                                                                                                                                                                                                                                                                                                                                                                                                                                                                                                                                                                                                                                                        | Alameda County Public Health Lab                 | Chan-Zuckerberg Biohub                                     | CZB Cliahub Consortium                                                                                   |
| EPI_ISL_1027330                                                                                                                                                                                                                                                                                                                                                                                                                                                                                                                                                                                                                                                                                                                                                                                                                                                                                                                                                                                                                                                                                                                                                                                                                                                        | Orange County Public Health Lab                  | Chan-Zuckerberg Biohub                                     | CZB Cliahub Consortium                                                                                   |
| EPI_ISL_1027331                                                                                                                                                                                                                                                                                                                                                                                                                                                                                                                                                                                                                                                                                                                                                                                                                                                                                                                                                                                                                                                                                                                                                                                                                                                        | Santa Clara County Public Health Laboratory      | Chan-Zuckerberg Biohub                                     | CZB Cliahub Consortium                                                                                   |
| EPI_ISL_1027332                                                                                                                                                                                                                                                                                                                                                                                                                                                                                                                                                                                                                                                                                                                                                                                                                                                                                                                                                                                                                                                                                                                                                                                                                                                        | Alameda County Public Health Lab                 | Chan-Zuckerberg Biohub                                     | CZB Cliahub Consortium                                                                                   |
| EPI_ISL_1027333                                                                                                                                                                                                                                                                                                                                                                                                                                                                                                                                                                                                                                                                                                                                                                                                                                                                                                                                                                                                                                                                                                                                                                                                                                                        | Orange County Public Health Lab                  | Chan-Zuckerberg Biohub                                     | CZB Cliahub Consortium                                                                                   |
| EPI_ISL_1027335                                                                                                                                                                                                                                                                                                                                                                                                                                                                                                                                                                                                                                                                                                                                                                                                                                                                                                                                                                                                                                                                                                                                                                                                                                                        | Alameda County Public Health Lab                 | Chan-Zuckerberg Biohub                                     | CZB Cliahub Consortium                                                                                   |
| EPI_ISL_1027336                                                                                                                                                                                                                                                                                                                                                                                                                                                                                                                                                                                                                                                                                                                                                                                                                                                                                                                                                                                                                                                                                                                                                                                                                                                        | Santa Clara County Public Health Laboratory      | Chan-Zuckerberg Biohub                                     | CZB Cliahub Consortium                                                                                   |
| EPI_ISL_1027337, EPI_ISL_1027338                                                                                                                                                                                                                                                                                                                                                                                                                                                                                                                                                                                                                                                                                                                                                                                                                                                                                                                                                                                                                                                                                                                                                                                                                                       | Chan-Zuckerberg Biohub                           | Chan-Zuckerberg Biohub                                     | CZB Cliahub Consortium                                                                                   |

[illegible]

|                                                                                                                                                                                                                                                                                                                                                                                                                                                                                                                                                                                                                                                                                                                                                                                                                                                                                                                                                                                                                                                                                                                                                                                                                                                                                                                                                                                                                                                                                                                                       |                                                                                           |                                                                                                    |                                                                                                                                                                                                                                                                                                                                                |
|---------------------------------------------------------------------------------------------------------------------------------------------------------------------------------------------------------------------------------------------------------------------------------------------------------------------------------------------------------------------------------------------------------------------------------------------------------------------------------------------------------------------------------------------------------------------------------------------------------------------------------------------------------------------------------------------------------------------------------------------------------------------------------------------------------------------------------------------------------------------------------------------------------------------------------------------------------------------------------------------------------------------------------------------------------------------------------------------------------------------------------------------------------------------------------------------------------------------------------------------------------------------------------------------------------------------------------------------------------------------------------------------------------------------------------------------------------------------------------------------------------------------------------------|-------------------------------------------------------------------------------------------|----------------------------------------------------------------------------------------------------|------------------------------------------------------------------------------------------------------------------------------------------------------------------------------------------------------------------------------------------------------------------------------------------------------------------------------------------------|
| see above                                                                                                                                                                                                                                                                                                                                                                                                                                                                                                                                                                                                                                                                                                                                                                                                                                                                                                                                                                                                                                                                                                                                                                                                                                                                                                                                                                                                                                                                                                                             | Orange County Public Health Lab                                                           | Chan-Zuckerberg Biohub                                                                             | CZB Ciiahub Consortium                                                                                                                                                                                                                                                                                                                         |
| EPI_ISL_1030499                                                                                                                                                                                                                                                                                                                                                                                                                                                                                                                                                                                                                                                                                                                                                                                                                                                                                                                                                                                                                                                                                                                                                                                                                                                                                                                                                                                                                                                                                                                       | Humboldt County Public Health Laboratory                                                  | Chan-Zuckerberg Biohub                                                                             | CZB Ciiahub Consortium                                                                                                                                                                                                                                                                                                                         |
| EPI_ISL_1030500, EPI_ISL_1030501, EPI_ISL_1030502                                                                                                                                                                                                                                                                                                                                                                                                                                                                                                                                                                                                                                                                                                                                                                                                                                                                                                                                                                                                                                                                                                                                                                                                                                                                                                                                                                                                                                                                                     | Santa Clara County Public Health Laboratory                                               | Chan-Zuckerberg Biohub                                                                             | CZB Ciiahub Consortium                                                                                                                                                                                                                                                                                                                         |
| EPI_ISL_1040172, EPI_ISL_1040173, EPI_ISL_1040174, EPI_ISL_1040175, EPI_ISL_1040176, EPI_ISL_1040177, EPI_ISL_1040178, EPI_ISL_1040179, EPI_ISL_1040180, EPI_ISL_1040427, EPI_ISL_1040428, EPI_ISL_1040429, EPI_ISL_1040430, EPI_ISL_1040431, EPI_ISL_1040432, EPI_ISL_1040433, EPI_ISL_1040434, EPI_ISL_1040435, EPI_ISL_1040436, EPI_ISL_1040437                                                                                                                                                                                                                                                                                                                                                                                                                                                                                                                                                                                                                                                                                                                                                                                                                                                                                                                                                                                                                                                                                                                                                                                    |                                                                                           |                                                                                                    |                                                                                                                                                                                                                                                                                                                                                |
| see above                                                                                                                                                                                                                                                                                                                                                                                                                                                                                                                                                                                                                                                                                                                                                                                                                                                                                                                                                                                                                                                                                                                                                                                                                                                                                                                                                                                                                                                                                                                             | USC Clinical Lab                                                                          | Los Angeles County PHL                                                                             | P. Hemarajata et al.                                                                                                                                                                                                                                                                                                                           |
| EPI_ISL_1041034, EPI_ISL_1041035, EPI_ISL_1041036, EPI_ISL_1041037, EPI_ISL_1041038, EPI_ISL_1041039, EPI_ISL_1041040, EPI_ISL_1041041, EPI_ISL_1041042, EPI_ISL_1041043, EPI_ISL_1041044, EPI_ISL_1041045, EPI_ISL_1041046, EPI_ISL_1041047, EPI_ISL_1041048, EPI_ISL_1041049, EPI_ISL_1041050, EPI_ISL_1041051, EPI_ISL_1041052, EPI_ISL_1041053, EPI_ISL_1041055, EPI_ISL_1041056, EPI_ISL_1041057, EPI_ISL_1041058, EPI_ISL_1041059, EPI_ISL_1041060, EPI_ISL_1041061, EPI_ISL_1041062, EPI_ISL_1041063, EPI_ISL_1041064, EPI_ISL_1041065, EPI_ISL_1041066, EPI_ISL_1041067, EPI_ISL_1041068, EPI_ISL_1041069, EPI_ISL_1041070, EPI_ISL_1041071, EPI_ISL_1041072, EPI_ISL_1041073, EPI_ISL_1041074, EPI_ISL_1041075, EPI_ISL_1041076, EPI_ISL_1041077, EPI_ISL_1041078, EPI_ISL_1041079, EPI_ISL_1041080, EPI_ISL_1041081, EPI_ISL_1041082, EPI_ISL_1041083, EPI_ISL_1041084, EPI_ISL_1041085, EPI_ISL_1041086, EPI_ISL_1041087, EPI_ISL_1041088, EPI_ISL_1041089, EPI_ISL_1041090, EPI_ISL_1041091, EPI_ISL_1041092, EPI_ISL_1041093, EPI_ISL_1041094, EPI_ISL_1041095, EPI_ISL_1041096, EPI_ISL_1041097, EPI_ISL_1041098, EPI_ISL_1041099, EPI_ISL_1041100, EPI_ISL_1041101, EPI_ISL_1041102, EPI_ISL_1041103, EPI_ISL_1041104, EPI_ISL_1041105, EPI_ISL_1041106, EPI_ISL_1041107, EPI_ISL_1041181, EPI_ISL_1041182, EPI_ISL_1041183, EPI_ISL_1041184, EPI_ISL_1041185, EPI_ISL_1041186, EPI_ISL_1041187, EPI_ISL_1041188, EPI_ISL_1041189, EPI_ISL_1041190, EPI_ISL_1041191, EPI_ISL_1041192, EPI_ISL_1041193, EPI_ISL_1041194 |                                                                                           |                                                                                                    |                                                                                                                                                                                                                                                                                                                                                |
| see above                                                                                                                                                                                                                                                                                                                                                                                                                                                                                                                                                                                                                                                                                                                                                                                                                                                                                                                                                                                                                                                                                                                                                                                                                                                                                                                                                                                                                                                                                                                             | Innovative Genomics Institute, UC Berkeley                                                | Innovative Genomics Institute, UC Berkeley                                                         | Stacia Wyman, Haridha Shivram, Phil Frankino, Liana Lareau                                                                                                                                                                                                                                                                                     |
| EPI_ISL_1049262, EPI_ISL_1049263, EPI_ISL_1049264, EPI_ISL_1049265, EPI_ISL_1049266, EPI_ISL_1049267, EPI_ISL_1049268, EPI_ISL_1049269, EPI_ISL_1049270, EPI_ISL_1049271, EPI_ISL_1049272, EPI_ISL_1049273, EPI_ISL_1049274, EPI_ISL_1049275, EPI_ISL_1049276, EPI_ISL_1049277, EPI_ISL_1049278, EPI_ISL_1049279, EPI_ISL_1049280, EPI_ISL_1049281, EPI_ISL_1049282, EPI_ISL_1049283, EPI_ISL_1049284, EPI_ISL_1049285, EPI_ISL_1049286, EPI_ISL_1049287, EPI_ISL_1049288, EPI_ISL_1049289, EPI_ISL_1049290, EPI_ISL_1049291, EPI_ISL_1049292, EPI_ISL_1049293, EPI_ISL_1049294, EPI_ISL_1049295, EPI_ISL_1049296, EPI_ISL_1049297, EPI_ISL_1049298, EPI_ISL_1049299, EPI_ISL_1049300, EPI_ISL_1049301, EPI_ISL_1049302, EPI_ISL_1049303, EPI_ISL_1049304, EPI_ISL_1049305, EPI_ISL_1049306, EPI_ISL_1049307, EPI_ISL_1049308, EPI_ISL_1049309, EPI_ISL_1049310, EPI_ISL_1049311, EPI_ISL_1049312, EPI_ISL_1049313, EPI_ISL_1049314, EPI_ISL_1049315, EPI_ISL_1049316, EPI_ISL_1049317, EPI_ISL_1049318, EPI_ISL_1049319, EPI_ISL_1049320, EPI_ISL_1049321, EPI_ISL_1049322, EPI_ISL_1049323, EPI_ISL_1049324, EPI_ISL_1049325, EPI_ISL_1049326, EPI_ISL_1049327, EPI_ISL_1049328, EPI_ISL_1049329, EPI_ISL_1049330, EPI_ISL_1049331, EPI_ISL_1049332, EPI_ISL_1049333, EPI_ISL_1049334, EPI_ISL_1049335, EPI_ISL_1049336, EPI_ISL_1049337                                                                                                                                                                                            |                                                                                           |                                                                                                    |                                                                                                                                                                                                                                                                                                                                                |
| see above                                                                                                                                                                                                                                                                                                                                                                                                                                                                                                                                                                                                                                                                                                                                                                                                                                                                                                                                                                                                                                                                                                                                                                                                                                                                                                                                                                                                                                                                                                                             | Innovative Genomics Institute, UC Berkeley                                                | Innovative Genomics Institute, UC Berkeley                                                         | Stacia Wyman, Alison Ciling, Netravathi Krishnappa, Haridha Shivram, Phil Frankino, Liana Lareau                                                                                                                                                                                                                                               |
| EPI_ISL_1081192                                                                                                                                                                                                                                                                                                                                                                                                                                                                                                                                                                                                                                                                                                                                                                                                                                                                                                                                                                                                                                                                                                                                                                                                                                                                                                                                                                                                                                                                                                                       | Santa Clara County Public Health Laboratory                                               | Santa Clara County Public Health Laboratory                                                        | Santa Clara County Public Health Department                                                                                                                                                                                                                                                                                                    |
| EPI_ISL_1081457, EPI_ISL_1081458, EPI_ISL_1081619, EPI_ISL_1081620, EPI_ISL_1081621, EPI_ISL_1081622, EPI_ISL_1081623, EPI_ISL_1081624, EPI_ISL_1081625, EPI_ISL_1081626, EPI_ISL_1081627                                                                                                                                                                                                                                                                                                                                                                                                                                                                                                                                                                                                                                                                                                                                                                                                                                                                                                                                                                                                                                                                                                                                                                                                                                                                                                                                             |                                                                                           |                                                                                                    |                                                                                                                                                                                                                                                                                                                                                |
| see above                                                                                                                                                                                                                                                                                                                                                                                                                                                                                                                                                                                                                                                                                                                                                                                                                                                                                                                                                                                                                                                                                                                                                                                                                                                                                                                                                                                                                                                                                                                             | San Diego County Public Health Laboratory                                                 | Andersen lab at Scripps Research                                                                   | SEARCH Alliance San Diego with Tracy Basler, Jovan Shephard, Brett Austin                                                                                                                                                                                                                                                                      |
| EPI_ISL_1093144                                                                                                                                                                                                                                                                                                                                                                                                                                                                                                                                                                                                                                                                                                                                                                                                                                                                                                                                                                                                                                                                                                                                                                                                                                                                                                                                                                                                                                                                                                                       | Maya Juarez, Div. of Pulmonary, Critical Care and Sleep Medicine, UC Davis Medical Center | Díaz-Muñoz Lab, Department of Microbiology and Molecular Genetics, University of California, Davis | David A. Coil, Timothy Albertson, Shefali Banerjee, Greg Brennan, A.J. Campbell, Stuart H. Cohen, Satya Dandekar, Samuel L. Díaz-Muñoz, Jonathan A. Eisen, Tracey Goldstein, Ivy R. Jose, Maya Juarez, Brandt A Robinson, Stefan Rothenburg, Christian Sandrock, Ana M. M. Stoian, Daniel G Tompkins, Alexandre Tremeau-Bravard, Angela Haczku |
| EPI_ISL_1093547, EPI_ISL_1093548, EPI_ISL_1093549, EPI_ISL_1093550, EPI_ISL_1093553, EPI_ISL_1093554, EPI_ISL_1093555, EPI_ISL_1093556, EPI_ISL_1093563, EPI_ISL_1093565, EPI_ISL_1093566, EPI_ISL_1093568, EPI_ISL_1093569, EPI_ISL_1093571, EPI_ISL_1093573, EPI_ISL_1093574, EPI_ISL_1093575, EPI_ISL_1093576, EPI_ISL_1093577, EPI_ISL_1093578, EPI_ISL_1093579, EPI_ISL_1093580, EPI_ISL_1093581, EPI_ISL_1093582, EPI_ISL_1093583, EPI_ISL_1093584, EPI_ISL_1093585, EPI_ISL_1093586, EPI_ISL_1093587, EPI_ISL_1093588, EPI_ISL_1093589, EPI_ISL_1093590, EPI_ISL_1093591, EPI_ISL_1093592                                                                                                                                                                                                                                                                                                                                                                                                                                                                                                                                                                                                                                                                                                                                                                                                                                                                                                                                      |                                                                                           |                                                                                                    |                                                                                                                                                                                                                                                                                                                                                |
| see above                                                                                                                                                                                                                                                                                                                                                                                                                                                                                                                                                                                                                                                                                                                                                                                                                                                                                                                                                                                                                                                                                                                                                                                                                                                                                                                                                                                                                                                                                                                             | Alameda County Public Health Department                                                   | Alameda County Public Health Department                                                            | Kristna Hsieh, Maria Elma, Kevin Libuit                                                                                                                                                                                                                                                                                                        |
| EPI_ISL_1098638, EPI_ISL_1098643                                                                                                                                                                                                                                                                                                                                                                                                                                                                                                                                                                                                                                                                                                                                                                                                                                                                                                                                                                                                                                                                                                                                                                                                                                                                                                                                                                                                                                                                                                      | USC Clinical Lab                                                                          | Los Angeles County PHL                                                                             | P. Hemarajata et al.                                                                                                                                                                                                                                                                                                                           |
| EPI_ISL_1113761, EPI_ISL_1121043                                                                                                                                                                                                                                                                                                                                                                                                                                                                                                                                                                                                                                                                                                                                                                                                                                                                                                                                                                                                                                                                                                                                                                                                                                                                                                                                                                                                                                                                                                      | Kashi Clinical Laboratory                                                                 | Kashi Clinical Laboratory                                                                          | Zahra Kashi, Jenefer DeKoning                                                                                                                                                                                                                                                                                                                  |
| EPI_ISL_1137085, EPI_ISL_1137086, EPI_ISL_1137087, EPI_ISL_1137088, EPI_ISL_1137089                                                                                                                                                                                                                                                                                                                                                                                                                                                                                                                                                                                                                                                                                                                                                                                                                                                                                                                                                                                                                                                                                                                                                                                                                                                                                                                                                                                                                                                   | Alameda County Public Health Lab                                                          | Chan-Zuckerberg Biohub                                                                             | CZB Ciiahub Consortium                                                                                                                                                                                                                                                                                                                         |
| EPI_ISL_516745, EPI_ISL_516746, EPI_ISL_516747                                                                                                                                                                                                                                                                                                                                                                                                                                                                                                                                                                                                                                                                                                                                                                                                                                                                                                                                                                                                                                                                                                                                                                                                                                                                                                                                                                                                                                                                                        | UCSF Clinical Microbiology Laboratory                                                     | Chan-Zuckerberg Biohub                                                                             | CZB Ciiahub Consortium                                                                                                                                                                                                                                                                                                                         |
| EPI_ISL_536668, EPI_ISL_536678                                                                                                                                                                                                                                                                                                                                                                                                                                                                                                                                                                                                                                                                                                                                                                                                                                                                                                                                                                                                                                                                                                                                                                                                                                                                                                                                                                                                                                                                                                        | University of Wisconsin-Madison AIDS Vaccine Research Laboratories                        | University of Wisconsin-Madison AIDS Vaccine Research Laboratories                                 | Gage Moreno, Katarina Braun, et al. AIDS Vaccine Research Laboratories                                                                                                                                                                                                                                                                         |
| EPI_ISL_548337, EPI_ISL_548338, EPI_ISL_548339, EPI_ISL_548340, EPI_ISL_548341, EPI_ISL_548342, EPI_ISL_548343, EPI_ISL_548344                                                                                                                                                                                                                                                                                                                                                                                                                                                                                                                                                                                                                                                                                                                                                                                                                                                                                                                                                                                                                                                                                                                                                                                                                                                                                                                                                                                                        | County of Santa Clara Public Health Department                                            | Chan-Zuckerberg Biohub                                                                             | CZB Ciiahub Consortium                                                                                                                                                                                                                                                                                                                         |
| EPI_ISL_548347, EPI_ISL_548360, EPI_ISL_548365, EPI_ISL_548366, EPI_ISL_548370                                                                                                                                                                                                                                                                                                                                                                                                                                                                                                                                                                                                                                                                                                                                                                                                                                                                                                                                                                                                                                                                                                                                                                                                                                                                                                                                                                                                                                                        | County of San Luis Obispo Public Health Laboratory                                        | Chan-Zuckerberg Biohub                                                                             | CZB Ciiahub Consortium                                                                                                                                                                                                                                                                                                                         |
| EPI_ISL_548375, EPI_ISL_548381, EPI_ISL_548383, EPI_ISL_548387, EPI_ISL_548389, EPI_ISL_548405, EPI_ISL_548411, EPI_ISL_548412, EPI_ISL_548413                                                                                                                                                                                                                                                                                                                                                                                                                                                                                                                                                                                                                                                                                                                                                                                                                                                                                                                                                                                                                                                                                                                                                                                                                                                                                                                                                                                        | Orange County Public Health Laboratory                                                    | Chan-Zuckerberg Biohub                                                                             | CZB Ciiahub Consortium                                                                                                                                                                                                                                                                                                                         |
| EPI_ISL_548420, EPI_ISL_548434                                                                                                                                                                                                                                                                                                                                                                                                                                                                                                                                                                                                                                                                                                                                                                                                                                                                                                                                                                                                                                                                                                                                                                                                                                                                                                                                                                                                                                                                                                        | County of Santa Clara Public Health Department                                            | Chan-Zuckerberg Biohub                                                                             | CZB Ciiahub Consortium                                                                                                                                                                                                                                                                                                                         |
| EPI_ISL_548440, EPI_ISL_548441, EPI_ISL_548465, EPI_ISL_548467, EPI_ISL_548469                                                                                                                                                                                                                                                                                                                                                                                                                                                                                                                                                                                                                                                                                                                                                                                                                                                                                                                                                                                                                                                                                                                                                                                                                                                                                                                                                                                                                                                        | Orange County Public Health Laboratory                                                    | Chan-Zuckerberg Biohub                                                                             | CZB Ciiahub Consortium                                                                                                                                                                                                                                                                                                                         |
| EPI_ISL_548470                                                                                                                                                                                                                                                                                                                                                                                                                                                                                                                                                                                                                                                                                                                                                                                                                                                                                                                                                                                                                                                                                                                                                                                                                                                                                                                                                                                                                                                                                                                        | County of Santa Clara Public Health Department                                            | Chan-Zuckerberg Biohub                                                                             | CZB Ciiahub Consortium                                                                                                                                                                                                                                                                                                                         |
| EPI_ISL_548484                                                                                                                                                                                                                                                                                                                                                                                                                                                                                                                                                                                                                                                                                                                                                                                                                                                                                                                                                                                                                                                                                                                                                                                                                                                                                                                                                                                                                                                                                                                        | Orange County Public Health Laboratory                                                    | Chan-Zuckerberg Biohub                                                                             | CZB Ciiahub Consortium                                                                                                                                                                                                                                                                                                                         |
| EPI_ISL_548491, EPI_ISL_548492                                                                                                                                                                                                                                                                                                                                                                                                                                                                                                                                                                                                                                                                                                                                                                                                                                                                                                                                                                                                                                                                                                                                                                                                                                                                                                                                                                                                                                                                                                        | Contra Costa Public Health Lab                                                            | Chan-Zuckerberg Biohub                                                                             | CZB Ciiahub Consortium                                                                                                                                                                                                                                                                                                                         |
| EPI_ISL_548502, EPI_ISL_548504                                                                                                                                                                                                                                                                                                                                                                                                                                                                                                                                                                                                                                                                                                                                                                                                                                                                                                                                                                                                                                                                                                                                                                                                                                                                                                                                                                                                                                                                                                        | County of San Luis Obispo Public Health Laboratory                                        | Chan-Zuckerberg Biohub                                                                             | CZB Ciiahub Consortium                                                                                                                                                                                                                                                                                                                         |
| EPI_ISL_548505                                                                                                                                                                                                                                                                                                                                                                                                                                                                                                                                                                                                                                                                                                                                                                                                                                                                                                                                                                                                                                                                                                                                                                                                                                                                                                                                                                                                                                                                                                                        | UCSF Clinical Microbiology Laboratory                                                     | Chan-Zuckerberg Biohub                                                                             | CZB Ciiahub Consortium                                                                                                                                                                                                                                                                                                                         |
| EPI_ISL_548506, EPI_ISL_548507, EPI_ISL_548508, EPI_ISL_548510                                                                                                                                                                                                                                                                                                                                                                                                                                                                                                                                                                                                                                                                                                                                                                                                                                                                                                                                                                                                                                                                                                                                                                                                                                                                                                                                                                                                                                                                        | Contra Costa Public Health Lab                                                            | Chan-Zuckerberg Biohub                                                                             | CZB Ciiahub Consortium                                                                                                                                                                                                                                                                                                                         |
| EPI_ISL_548513                                                                                                                                                                                                                                                                                                                                                                                                                                                                                                                                                                                                                                                                                                                                                                                                                                                                                                                                                                                                                                                                                                                                                                                                                                                                                                                                                                                                                                                                                                                        | UCSF Clinical Microbiology Laboratory                                                     | Chan-Zuckerberg Biohub                                                                             | CZB Ciiahub Consortium                                                                                                                                                                                                                                                                                                                         |
| EPI_ISL_548515, EPI_ISL_548516, EPI_ISL_548520                                                                                                                                                                                                                                                                                                                                                                                                                                                                                                                                                                                                                                                                                                                                                                                                                                                                                                                                                                                                                                                                                                                                                                                                                                                                                                                                                                                                                                                                                        | Contra Costa Public Health Lab                                                            | Chan-Zuckerberg Biohub                                                                             | CZB Ciiahub Consortium                                                                                                                                                                                                                                                                                                                         |
| EPI_ISL_548522                                                                                                                                                                                                                                                                                                                                                                                                                                                                                                                                                                                                                                                                                                                                                                                                                                                                                                                                                                                                                                                                                                                                                                                                                                                                                                                                                                                                                                                                                                                        | UCSF Clinical Microbiology Laboratory                                                     | Chan-Zuckerberg Biohub                                                                             | CZB Ciiahub Consortium                                                                                                                                                                                                                                                                                                                         |
| EPI_ISL_548531                                                                                                                                                                                                                                                                                                                                                                                                                                                                                                                                                                                                                                                                                                                                                                                                                                                                                                                                                                                                                                                                                                                                                                                                                                                                                                                                                                                                                                                                                                                        | Contra Costa Public Health Lab                                                            | Chan-Zuckerberg Biohub                                                                             | CZB Ciiahub Consortium                                                                                                                                                                                                                                                                                                                         |
| EPI_ISL_548532                                                                                                                                                                                                                                                                                                                                                                                                                                                                                                                                                                                                                                                                                                                                                                                                                                                                                                                                                                                                                                                                                                                                                                                                                                                                                                                                                                                                                                                                                                                        | County of San Luis Obispo Public Health Laboratory                                        | Chan-Zuckerberg Biohub                                                                             | CZB Ciiahub Consortium                                                                                                                                                                                                                                                                                                                         |
| EPI_ISL_548534                                                                                                                                                                                                                                                                                                                                                                                                                                                                                                                                                                                                                                                                                                                                                                                                                                                                                                                                                                                                                                                                                                                                                                                                                                                                                                                                                                                                                                                                                                                        | Contra Costa Public Health Lab                                                            | Chan-Zuckerberg Biohub                                                                             | CZB Ciiahub Consortium                                                                                                                                                                                                                                                                                                                         |
| EPI_ISL_548544                                                                                                                                                                                                                                                                                                                                                                                                                                                                                                                                                                                                                                                                                                                                                                                                                                                                                                                                                                                                                                                                                                                                                                                                                                                                                                                                                                                                                                                                                                                        | County of San Luis Obispo Public Health Laboratory                                        | Chan-Zuckerberg Biohub                                                                             | CZB Ciiahub Consortium                                                                                                                                                                                                                                                                                                                         |

[illegible]

[illegible]



|                                                                                                                                                                                                                                                                                                                                                                                                                                                                                                                                                                                                                                                                                                                                                                                                                                                                                                                                                                                                                                                                                                                                                                                                                                                                                                                                                                                                                                                                                                                                                                                                                                                                                                                                                                                                                                                                                                                                                                                                                                                                                                                                                                                                                                                                                                                                                                                |                                             |                                             |                                                                                         |
|--------------------------------------------------------------------------------------------------------------------------------------------------------------------------------------------------------------------------------------------------------------------------------------------------------------------------------------------------------------------------------------------------------------------------------------------------------------------------------------------------------------------------------------------------------------------------------------------------------------------------------------------------------------------------------------------------------------------------------------------------------------------------------------------------------------------------------------------------------------------------------------------------------------------------------------------------------------------------------------------------------------------------------------------------------------------------------------------------------------------------------------------------------------------------------------------------------------------------------------------------------------------------------------------------------------------------------------------------------------------------------------------------------------------------------------------------------------------------------------------------------------------------------------------------------------------------------------------------------------------------------------------------------------------------------------------------------------------------------------------------------------------------------------------------------------------------------------------------------------------------------------------------------------------------------------------------------------------------------------------------------------------------------------------------------------------------------------------------------------------------------------------------------------------------------------------------------------------------------------------------------------------------------------------------------------------------------------------------------------------------------|---------------------------------------------|---------------------------------------------|-----------------------------------------------------------------------------------------|
| EPI_ISL_672098, EPI_ISL_672099, EPI_ISL_672100, EPI_ISL_672101, EPI_ISL_672102                                                                                                                                                                                                                                                                                                                                                                                                                                                                                                                                                                                                                                                                                                                                                                                                                                                                                                                                                                                                                                                                                                                                                                                                                                                                                                                                                                                                                                                                                                                                                                                                                                                                                                                                                                                                                                                                                                                                                                                                                                                                                                                                                                                                                                                                                                 | Madera County Department of Public Health   | Chan-Zuckerberg Biohub                      | CZB Ciiahub Consortium                                                                  |
| EPI_ISL_672103                                                                                                                                                                                                                                                                                                                                                                                                                                                                                                                                                                                                                                                                                                                                                                                                                                                                                                                                                                                                                                                                                                                                                                                                                                                                                                                                                                                                                                                                                                                                                                                                                                                                                                                                                                                                                                                                                                                                                                                                                                                                                                                                                                                                                                                                                                                                                                 | Orange County Public Health Lab             | Chan-Zuckerberg Biohub                      | CZB Ciiahub Consortium                                                                  |
| EPI_ISL_672104, EPI_ISL_672106, EPI_ISL_672107, EPI_ISL_672108                                                                                                                                                                                                                                                                                                                                                                                                                                                                                                                                                                                                                                                                                                                                                                                                                                                                                                                                                                                                                                                                                                                                                                                                                                                                                                                                                                                                                                                                                                                                                                                                                                                                                                                                                                                                                                                                                                                                                                                                                                                                                                                                                                                                                                                                                                                 | Santa Clara County Public Health Laboratory | Chan-Zuckerberg Biohub                      | CZB Ciiahub Consortium                                                                  |
| EPI_ISL_672109, EPI_ISL_672110                                                                                                                                                                                                                                                                                                                                                                                                                                                                                                                                                                                                                                                                                                                                                                                                                                                                                                                                                                                                                                                                                                                                                                                                                                                                                                                                                                                                                                                                                                                                                                                                                                                                                                                                                                                                                                                                                                                                                                                                                                                                                                                                                                                                                                                                                                                                                 | Orange County Public Health Lab             | Chan-Zuckerberg Biohub                      | CZB Ciiahub Consortium                                                                  |
| EPI_ISL_672111                                                                                                                                                                                                                                                                                                                                                                                                                                                                                                                                                                                                                                                                                                                                                                                                                                                                                                                                                                                                                                                                                                                                                                                                                                                                                                                                                                                                                                                                                                                                                                                                                                                                                                                                                                                                                                                                                                                                                                                                                                                                                                                                                                                                                                                                                                                                                                 | Santa Clara County Public Health Laboratory | Chan-Zuckerberg Biohub                      | CZB Ciiahub Consortium                                                                  |
| EPI_ISL_672113                                                                                                                                                                                                                                                                                                                                                                                                                                                                                                                                                                                                                                                                                                                                                                                                                                                                                                                                                                                                                                                                                                                                                                                                                                                                                                                                                                                                                                                                                                                                                                                                                                                                                                                                                                                                                                                                                                                                                                                                                                                                                                                                                                                                                                                                                                                                                                 | Alameda County Public Health Lab            | Chan-Zuckerberg Biohub                      | CZB Ciiahub Consortium                                                                  |
| EPI_ISL_672277, EPI_ISL_672278, EPI_ISL_672279, EPI_ISL_672280, EPI_ISL_672281, EPI_ISL_672282, EPI_ISL_672283, EPI_ISL_672284, EPI_ISL_672285, EPI_ISL_672286, EPI_ISL_672287, EPI_ISL_672288, EPI_ISL_672289, EPI_ISL_672290, EPI_ISL_672291, EPI_ISL_672292, EPI_ISL_672293, EPI_ISL_672294, EPI_ISL_672295, EPI_ISL_672296, EPI_ISL_672297, EPI_ISL_672298, EPI_ISL_672299, EPI_ISL_672300, EPI_ISL_672301, EPI_ISL_672302, EPI_ISL_672303, EPI_ISL_672304                                                                                                                                                                                                                                                                                                                                                                                                                                                                                                                                                                                                                                                                                                                                                                                                                                                                                                                                                                                                                                                                                                                                                                                                                                                                                                                                                                                                                                                                                                                                                                                                                                                                                                                                                                                                                                                                                                                 |                                             |                                             |                                                                                         |
| see above                                                                                                                                                                                                                                                                                                                                                                                                                                                                                                                                                                                                                                                                                                                                                                                                                                                                                                                                                                                                                                                                                                                                                                                                                                                                                                                                                                                                                                                                                                                                                                                                                                                                                                                                                                                                                                                                                                                                                                                                                                                                                                                                                                                                                                                                                                                                                                      | Santa Clara County Public Health Laboratory | Chan-Zuckerberg Biohub                      | CZB Ciiahub Consortium                                                                  |
| EPI_ISL_672361, EPI_ISL_672362, EPI_ISL_672363, EPI_ISL_672364, EPI_ISL_672365, EPI_ISL_672366, EPI_ISL_672367, EPI_ISL_672368, EPI_ISL_672369, EPI_ISL_672370, EPI_ISL_672371, EPI_ISL_672372, EPI_ISL_672373, EPI_ISL_672374                                                                                                                                                                                                                                                                                                                                                                                                                                                                                                                                                                                                                                                                                                                                                                                                                                                                                                                                                                                                                                                                                                                                                                                                                                                                                                                                                                                                                                                                                                                                                                                                                                                                                                                                                                                                                                                                                                                                                                                                                                                                                                                                                 |                                             |                                             |                                                                                         |
| see above                                                                                                                                                                                                                                                                                                                                                                                                                                                                                                                                                                                                                                                                                                                                                                                                                                                                                                                                                                                                                                                                                                                                                                                                                                                                                                                                                                                                                                                                                                                                                                                                                                                                                                                                                                                                                                                                                                                                                                                                                                                                                                                                                                                                                                                                                                                                                                      | Orange County Public Health Lab             | Chan-Zuckerberg Biohub                      | CZB Ciiahub Consortium                                                                  |
| EPI_ISL_672378, EPI_ISL_672380, EPI_ISL_672381                                                                                                                                                                                                                                                                                                                                                                                                                                                                                                                                                                                                                                                                                                                                                                                                                                                                                                                                                                                                                                                                                                                                                                                                                                                                                                                                                                                                                                                                                                                                                                                                                                                                                                                                                                                                                                                                                                                                                                                                                                                                                                                                                                                                                                                                                                                                 | San Francisco Public Health Laboratory      | Chan-Zuckerberg Biohub                      | CZB Ciiahub Consortium                                                                  |
| EPI_ISL_672388, EPI_ISL_672393                                                                                                                                                                                                                                                                                                                                                                                                                                                                                                                                                                                                                                                                                                                                                                                                                                                                                                                                                                                                                                                                                                                                                                                                                                                                                                                                                                                                                                                                                                                                                                                                                                                                                                                                                                                                                                                                                                                                                                                                                                                                                                                                                                                                                                                                                                                                                 | UCSF Clinical Microbiology Laboratory       | Chan-Zuckerberg Biohub                      | CZB Ciiahub Consortium                                                                  |
| EPI_ISL_672394, EPI_ISL_672395, EPI_ISL_672396, EPI_ISL_672397, EPI_ISL_672398, EPI_ISL_672399, EPI_ISL_672400, EPI_ISL_672401, EPI_ISL_672402, EPI_ISL_672403, EPI_ISL_672404, EPI_ISL_672405, EPI_ISL_672406, EPI_ISL_672407, EPI_ISL_672408, EPI_ISL_672409, EPI_ISL_672410, EPI_ISL_672411, EPI_ISL_672412, EPI_ISL_672413, EPI_ISL_672414, EPI_ISL_672415, EPI_ISL_672416, EPI_ISL_672417, EPI_ISL_672418, EPI_ISL_672419, EPI_ISL_672420, EPI_ISL_672421, EPI_ISL_672422                                                                                                                                                                                                                                                                                                                                                                                                                                                                                                                                                                                                                                                                                                                                                                                                                                                                                                                                                                                                                                                                                                                                                                                                                                                                                                                                                                                                                                                                                                                                                                                                                                                                                                                                                                                                                                                                                                 |                                             |                                             |                                                                                         |
| see above                                                                                                                                                                                                                                                                                                                                                                                                                                                                                                                                                                                                                                                                                                                                                                                                                                                                                                                                                                                                                                                                                                                                                                                                                                                                                                                                                                                                                                                                                                                                                                                                                                                                                                                                                                                                                                                                                                                                                                                                                                                                                                                                                                                                                                                                                                                                                                      | Madera County Department of Public Health   | Chan-Zuckerberg Biohub                      | CZB Ciiahub Consortium                                                                  |
| EPI_ISL_672423, EPI_ISL_672424, EPI_ISL_672425                                                                                                                                                                                                                                                                                                                                                                                                                                                                                                                                                                                                                                                                                                                                                                                                                                                                                                                                                                                                                                                                                                                                                                                                                                                                                                                                                                                                                                                                                                                                                                                                                                                                                                                                                                                                                                                                                                                                                                                                                                                                                                                                                                                                                                                                                                                                 | Fresno County Public Health Laboratory      | Chan-Zuckerberg Biohub                      | CZB Ciiahub Consortium                                                                  |
| EPI_ISL_672426, EPI_ISL_672427, EPI_ISL_672428                                                                                                                                                                                                                                                                                                                                                                                                                                                                                                                                                                                                                                                                                                                                                                                                                                                                                                                                                                                                                                                                                                                                                                                                                                                                                                                                                                                                                                                                                                                                                                                                                                                                                                                                                                                                                                                                                                                                                                                                                                                                                                                                                                                                                                                                                                                                 | UCSF Clinical Microbiology Laboratory       | Chan-Zuckerberg Biohub                      | CZB Ciiahub Consortium                                                                  |
| EPI_ISL_672429, EPI_ISL_672430, EPI_ISL_672431, EPI_ISL_672432, EPI_ISL_672433, EPI_ISL_672434, EPI_ISL_672435, EPI_ISL_672436, EPI_ISL_672437, EPI_ISL_672438                                                                                                                                                                                                                                                                                                                                                                                                                                                                                                                                                                                                                                                                                                                                                                                                                                                                                                                                                                                                                                                                                                                                                                                                                                                                                                                                                                                                                                                                                                                                                                                                                                                                                                                                                                                                                                                                                                                                                                                                                                                                                                                                                                                                                 | Santa Clara County Public Health Laboratory | Chan-Zuckerberg Biohub                      | CZB Ciiahub Consortium                                                                  |
| EPI_ISL_672454, EPI_ISL_672455, EPI_ISL_672456, EPI_ISL_672457, EPI_ISL_672458, EPI_ISL_672459, EPI_ISL_672460, EPI_ISL_672461, EPI_ISL_672462, EPI_ISL_672463, EPI_ISL_672464, EPI_ISL_672465, EPI_ISL_672466, EPI_ISL_672467, EPI_ISL_672468, EPI_ISL_672469, EPI_ISL_672470, EPI_ISL_672471, EPI_ISL_672472, EPI_ISL_672473, EPI_ISL_672474, EPI_ISL_672475, EPI_ISL_672476                                                                                                                                                                                                                                                                                                                                                                                                                                                                                                                                                                                                                                                                                                                                                                                                                                                                                                                                                                                                                                                                                                                                                                                                                                                                                                                                                                                                                                                                                                                                                                                                                                                                                                                                                                                                                                                                                                                                                                                                 |                                             |                                             |                                                                                         |
| see above                                                                                                                                                                                                                                                                                                                                                                                                                                                                                                                                                                                                                                                                                                                                                                                                                                                                                                                                                                                                                                                                                                                                                                                                                                                                                                                                                                                                                                                                                                                                                                                                                                                                                                                                                                                                                                                                                                                                                                                                                                                                                                                                                                                                                                                                                                                                                                      | Alameda County Public Health Lab            | Chan-Zuckerberg Biohub                      | CZB Ciiahub Consortium                                                                  |
| EPI_ISL_672477, EPI_ISL_672478, EPI_ISL_672479, EPI_ISL_672480, EPI_ISL_672481, EPI_ISL_672482, EPI_ISL_672483, EPI_ISL_672484, EPI_ISL_672485, EPI_ISL_672486, EPI_ISL_672487                                                                                                                                                                                                                                                                                                                                                                                                                                                                                                                                                                                                                                                                                                                                                                                                                                                                                                                                                                                                                                                                                                                                                                                                                                                                                                                                                                                                                                                                                                                                                                                                                                                                                                                                                                                                                                                                                                                                                                                                                                                                                                                                                                                                 |                                             |                                             |                                                                                         |
| see above                                                                                                                                                                                                                                                                                                                                                                                                                                                                                                                                                                                                                                                                                                                                                                                                                                                                                                                                                                                                                                                                                                                                                                                                                                                                                                                                                                                                                                                                                                                                                                                                                                                                                                                                                                                                                                                                                                                                                                                                                                                                                                                                                                                                                                                                                                                                                                      | Orange County Public Health Lab             | Chan-Zuckerberg Biohub                      | CZB Ciiahub Consortium                                                                  |
| EPI_ISL_672488, EPI_ISL_672489                                                                                                                                                                                                                                                                                                                                                                                                                                                                                                                                                                                                                                                                                                                                                                                                                                                                                                                                                                                                                                                                                                                                                                                                                                                                                                                                                                                                                                                                                                                                                                                                                                                                                                                                                                                                                                                                                                                                                                                                                                                                                                                                                                                                                                                                                                                                                 | Contra Costa County Public Health Lab       | Chan-Zuckerberg Biohub                      | CZB Ciiahub Consortium                                                                  |
| EPI_ISL_672501                                                                                                                                                                                                                                                                                                                                                                                                                                                                                                                                                                                                                                                                                                                                                                                                                                                                                                                                                                                                                                                                                                                                                                                                                                                                                                                                                                                                                                                                                                                                                                                                                                                                                                                                                                                                                                                                                                                                                                                                                                                                                                                                                                                                                                                                                                                                                                 | UCSF Clinical Microbiology Laboratory       | Chan-Zuckerberg Biohub                      | CZB Ciiahub Consortium                                                                  |
| EPI_ISL_672504, EPI_ISL_672505, EPI_ISL_672506, EPI_ISL_672507, EPI_ISL_672508, EPI_ISL_672509, EPI_ISL_672510, EPI_ISL_672511, EPI_ISL_672512, EPI_ISL_672513, EPI_ISL_672514, EPI_ISL_672515, EPI_ISL_672516, EPI_ISL_672517, EPI_ISL_672518, EPI_ISL_672519, EPI_ISL_672520, EPI_ISL_672521, EPI_ISL_672522, EPI_ISL_672523, EPI_ISL_672524, EPI_ISL_672525, EPI_ISL_672526, EPI_ISL_672527, EPI_ISL_672528, EPI_ISL_672529, EPI_ISL_672530                                                                                                                                                                                                                                                                                                                                                                                                                                                                                                                                                                                                                                                                                                                                                                                                                                                                                                                                                                                                                                                                                                                                                                                                                                                                                                                                                                                                                                                                                                                                                                                                                                                                                                                                                                                                                                                                                                                                 |                                             |                                             |                                                                                         |
| see above                                                                                                                                                                                                                                                                                                                                                                                                                                                                                                                                                                                                                                                                                                                                                                                                                                                                                                                                                                                                                                                                                                                                                                                                                                                                                                                                                                                                                                                                                                                                                                                                                                                                                                                                                                                                                                                                                                                                                                                                                                                                                                                                                                                                                                                                                                                                                                      | Madera County Department of Public Health   | Chan-Zuckerberg Biohub                      | CZB Ciiahub Consortium                                                                  |
| EPI_ISL_677826, EPI_ISL_677827, EPI_ISL_677828, EPI_ISL_677829, EPI_ISL_677830, EPI_ISL_677831, EPI_ISL_677832, EPI_ISL_677833, EPI_ISL_677834, EPI_ISL_677835, EPI_ISL_677836, EPI_ISL_677837, EPI_ISL_677838, EPI_ISL_677839, EPI_ISL_677840, EPI_ISL_677841, EPI_ISL_677842, EPI_ISL_677843, EPI_ISL_677844, EPI_ISL_677845, EPI_ISL_677846, EPI_ISL_677847, EPI_ISL_677848, EPI_ISL_677849, EPI_ISL_677850, EPI_ISL_677851, EPI_ISL_677852, EPI_ISL_677853, EPI_ISL_677854, EPI_ISL_677855, EPI_ISL_677856, EPI_ISL_677857, EPI_ISL_677858, EPI_ISL_677859, EPI_ISL_677860, EPI_ISL_677861, EPI_ISL_677862, EPI_ISL_677864, EPI_ISL_677865, EPI_ISL_677866, EPI_ISL_677867, EPI_ISL_677868, EPI_ISL_677869, EPI_ISL_677870, EPI_ISL_677871, EPI_ISL_677872, EPI_ISL_677873, EPI_ISL_677874, EPI_ISL_677875, EPI_ISL_677876, EPI_ISL_677878, EPI_ISL_677879, EPI_ISL_677880, EPI_ISL_677881, EPI_ISL_677882, EPI_ISL_677883, EPI_ISL_677884, EPI_ISL_677885, EPI_ISL_677886, EPI_ISL_677887, EPI_ISL_677888, EPI_ISL_677895, EPI_ISL_677904, EPI_ISL_677906                                                                                                                                                                                                                                                                                                                                                                                                                                                                                                                                                                                                                                                                                                                                                                                                                                                                                                                                                                                                                                                                                                                                                                                                                                                                                                                 |                                             |                                             |                                                                                         |
| see above                                                                                                                                                                                                                                                                                                                                                                                                                                                                                                                                                                                                                                                                                                                                                                                                                                                                                                                                                                                                                                                                                                                                                                                                                                                                                                                                                                                                                                                                                                                                                                                                                                                                                                                                                                                                                                                                                                                                                                                                                                                                                                                                                                                                                                                                                                                                                                      | Innovative Genomics Institute, UC Berkeley  | Innovative Genomics Institute, UC Berkeley  | Stacia Wyman, Haridha Shivram, Phil Frankino, Liana Lareau, Shana McDevitt, Justin Choi |
| EPI_ISL_694046                                                                                                                                                                                                                                                                                                                                                                                                                                                                                                                                                                                                                                                                                                                                                                                                                                                                                                                                                                                                                                                                                                                                                                                                                                                                                                                                                                                                                                                                                                                                                                                                                                                                                                                                                                                                                                                                                                                                                                                                                                                                                                                                                                                                                                                                                                                                                                 | Los Angeles County Public Health Laboratory | Los Angeles County Public Health Laboratory | Peera Hemarajata et al.                                                                 |
| EPI_ISL_707694, EPI_ISL_707695, EPI_ISL_707883, EPI_ISL_707884, EPI_ISL_707885, EPI_ISL_707886, EPI_ISL_707887, EPI_ISL_707888, EPI_ISL_707889                                                                                                                                                                                                                                                                                                                                                                                                                                                                                                                                                                                                                                                                                                                                                                                                                                                                                                                                                                                                                                                                                                                                                                                                                                                                                                                                                                                                                                                                                                                                                                                                                                                                                                                                                                                                                                                                                                                                                                                                                                                                                                                                                                                                                                 | Los Angeles County Public Health Laboratory | Los Angeles County Public Health Laboratory | P. Hemarajata et al.                                                                    |
| EPI_ISL_708182, EPI_ISL_708183                                                                                                                                                                                                                                                                                                                                                                                                                                                                                                                                                                                                                                                                                                                                                                                                                                                                                                                                                                                                                                                                                                                                                                                                                                                                                                                                                                                                                                                                                                                                                                                                                                                                                                                                                                                                                                                                                                                                                                                                                                                                                                                                                                                                                                                                                                                                                 | Los Angeles County PHL                      | Los Angeles County PHL                      | P. Hemarajata et al.                                                                    |
| EPI_ISL_708507                                                                                                                                                                                                                                                                                                                                                                                                                                                                                                                                                                                                                                                                                                                                                                                                                                                                                                                                                                                                                                                                                                                                                                                                                                                                                                                                                                                                                                                                                                                                                                                                                                                                                                                                                                                                                                                                                                                                                                                                                                                                                                                                                                                                                                                                                                                                                                 | Los Angeles County Public Health Laboratory | Los Angeles County Public Health Laboratory | P. Hemarajata et al.                                                                    |
| EPI_ISL_708528                                                                                                                                                                                                                                                                                                                                                                                                                                                                                                                                                                                                                                                                                                                                                                                                                                                                                                                                                                                                                                                                                                                                                                                                                                                                                                                                                                                                                                                                                                                                                                                                                                                                                                                                                                                                                                                                                                                                                                                                                                                                                                                                                                                                                                                                                                                                                                 | Los Angeles County PHL                      | Los Angeles County PHL                      | P. Hemarajata et al.                                                                    |
| EPI_ISL_708724, EPI_ISL_708727, EPI_ISL_708728, EPI_ISL_708729                                                                                                                                                                                                                                                                                                                                                                                                                                                                                                                                                                                                                                                                                                                                                                                                                                                                                                                                                                                                                                                                                                                                                                                                                                                                                                                                                                                                                                                                                                                                                                                                                                                                                                                                                                                                                                                                                                                                                                                                                                                                                                                                                                                                                                                                                                                 | Los Angeles County Public Health Laboratory | Los Angeles County Public Health Laboratory | P. Hemarajata et al.                                                                    |
| EPI_ISL_710099, EPI_ISL_710100, EPI_ISL_710101, EPI_ISL_710102, EPI_ISL_710103, EPI_ISL_710104, EPI_ISL_710105, EPI_ISL_710106, EPI_ISL_710107, EPI_ISL_710108, EPI_ISL_710109, EPI_ISL_710110, EPI_ISL_710111, EPI_ISL_710112, EPI_ISL_710113, EPI_ISL_710114, EPI_ISL_710115, EPI_ISL_710116, EPI_ISL_710117, EPI_ISL_710118, EPI_ISL_710416, EPI_ISL_710417, EPI_ISL_710418, EPI_ISL_710419, EPI_ISL_710421, EPI_ISL_710422, EPI_ISL_710423, EPI_ISL_710424, EPI_ISL_710425, EPI_ISL_710426, EPI_ISL_710427, EPI_ISL_710428, EPI_ISL_710429, EPI_ISL_710430, EPI_ISL_710431, EPI_ISL_710432                                                                                                                                                                                                                                                                                                                                                                                                                                                                                                                                                                                                                                                                                                                                                                                                                                                                                                                                                                                                                                                                                                                                                                                                                                                                                                                                                                                                                                                                                                                                                                                                                                                                                                                                                                                 |                                             |                                             |                                                                                         |
| see above                                                                                                                                                                                                                                                                                                                                                                                                                                                                                                                                                                                                                                                                                                                                                                                                                                                                                                                                                                                                                                                                                                                                                                                                                                                                                                                                                                                                                                                                                                                                                                                                                                                                                                                                                                                                                                                                                                                                                                                                                                                                                                                                                                                                                                                                                                                                                                      | Los Angeles County PHL                      | Los Angeles County PHL                      | P. Hemarajata et al.                                                                    |
| EPI_ISL_710433                                                                                                                                                                                                                                                                                                                                                                                                                                                                                                                                                                                                                                                                                                                                                                                                                                                                                                                                                                                                                                                                                                                                                                                                                                                                                                                                                                                                                                                                                                                                                                                                                                                                                                                                                                                                                                                                                                                                                                                                                                                                                                                                                                                                                                                                                                                                                                 | Los Angeles County Public Health Laboratory | Los Angeles County Public Health Laboratory | P. Hemarajata et al.                                                                    |
| EPI_ISL_730085, EPI_ISL_730086, EPI_ISL_730087, EPI_ISL_730089, EPI_ISL_730090, EPI_ISL_730091, EPI_ISL_730092, EPI_ISL_730093, EPI_ISL_730094, EPI_ISL_730095, EPI_ISL_730097, EPI_ISL_730098, EPI_ISL_730099, EPI_ISL_730100, EPI_ISL_730101, EPI_ISL_730102, EPI_ISL_730105, EPI_ISL_730106, EPI_ISL_730107, EPI_ISL_730108, EPI_ISL_730109, EPI_ISL_730110, EPI_ISL_730111, EPI_ISL_730112, EPI_ISL_730113, EPI_ISL_730114, EPI_ISL_730115, EPI_ISL_730116, EPI_ISL_730117, EPI_ISL_730120, EPI_ISL_730121, EPI_ISL_730122, EPI_ISL_730123, EPI_ISL_730124, EPI_ISL_730125, EPI_ISL_730161, EPI_ISL_730162, EPI_ISL_730163, EPI_ISL_730164, EPI_ISL_730165, EPI_ISL_730166, EPI_ISL_730167, EPI_ISL_730168, EPI_ISL_730169, EPI_ISL_730170, EPI_ISL_730171, EPI_ISL_730172, EPI_ISL_730173, EPI_ISL_730174, EPI_ISL_730175, EPI_ISL_730176, EPI_ISL_730177, EPI_ISL_730178, EPI_ISL_730179, EPI_ISL_730180, EPI_ISL_730181, EPI_ISL_730182, EPI_ISL_730183, EPI_ISL_730184, EPI_ISL_730185, EPI_ISL_730186, EPI_ISL_730187, EPI_ISL_730188, EPI_ISL_730189, EPI_ISL_730190, EPI_ISL_730191, EPI_ISL_730192, EPI_ISL_730193, EPI_ISL_730194, EPI_ISL_730195, EPI_ISL_730196, EPI_ISL_730291, EPI_ISL_730292, EPI_ISL_730293, EPI_ISL_730294, EPI_ISL_730295, EPI_ISL_730296, EPI_ISL_730297, EPI_ISL_730298, EPI_ISL_730299, EPI_ISL_730300, EPI_ISL_730301, EPI_ISL_730302, EPI_ISL_730303, EPI_ISL_730304, EPI_ISL_730305, EPI_ISL_730306, EPI_ISL_730307, EPI_ISL_730308, EPI_ISL_730309, EPI_ISL_730310, EPI_ISL_730311, EPI_ISL_730312, EPI_ISL_730313, EPI_ISL_730314, EPI_ISL_730315, EPI_ISL_730316, EPI_ISL_730317, EPI_ISL_730318, EPI_ISL_730319, EPI_ISL_730320, EPI_ISL_730322, EPI_ISL_730323, EPI_ISL_730324, EPI_ISL_730325, EPI_ISL_730326, EPI_ISL_730328, EPI_ISL_730329, EPI_ISL_730332, EPI_ISL_730333, EPI_ISL_730336, EPI_ISL_730337, EPI_ISL_730338, EPI_ISL_730340, EPI_ISL_730341, EPI_ISL_730342, EPI_ISL_730343, EPI_ISL_730344, EPI_ISL_730345, EPI_ISL_730346, EPI_ISL_730348, EPI_ISL_730349, EPI_ISL_730351, EPI_ISL_730352, EPI_ISL_730353, EPI_ISL_730354, EPI_ISL_730355, EPI_ISL_730356, EPI_ISL_730357, EPI_ISL_730358, EPI_ISL_730359, EPI_ISL_730360, EPI_ISL_730361, EPI_ISL_730362, EPI_ISL_730363, EPI_ISL_730364, EPI_ISL_730365, EPI_ISL_730366, EPI_ISL_730367, EPI_ISL_730368, EPI_ISL_730369, EPI_ISL_730370, EPI_ISL_730371 |                                             |                                             |                                                                                         |
| see above                                                                                                                                                                                                                                                                                                                                                                                                                                                                                                                                                                                                                                                                                                                                                                                                                                                                                                                                                                                                                                                                                                                                                                                                                                                                                                                                                                                                                                                                                                                                                                                                                                                                                                                                                                                                                                                                                                                                                                                                                                                                                                                                                                                                                                                                                                                                                                      | San Diego County Public Health Laboratory   | Andersen lab at Scripps Research            | SEARCH Alliance San Diego with Tracy Basler, Jovan Shephard, Brett Austin               |





[illegible]

|                                                                                                                                                                                                                   |                                                                                                                                                                                                                                       |                                                                                                                                |                                                                                                                                |
|-------------------------------------------------------------------------------------------------------------------------------------------------------------------------------------------------------------------|---------------------------------------------------------------------------------------------------------------------------------------------------------------------------------------------------------------------------------------|--------------------------------------------------------------------------------------------------------------------------------|--------------------------------------------------------------------------------------------------------------------------------|
| EPI_ISL_738695, EPI_ISL_738696,<br>EPI_ISL_738697, EPI_ISL_738698,<br>EPI_ISL_738700, EPI_ISL_738701,<br>EPI_ISL_738702                                                                                           | Santa Clara County Public Health Laboratory                                                                                                                                                                                           | Chan-Zuckerberg Biohub                                                                                                         | CZB Cliahub Consortium                                                                                                         |
| EPI_ISL_738703, EPI_ISL_738704<br>EPI_ISL_738705, EPI_ISL_738706<br>EPI_ISL_738707, EPI_ISL_738708                                                                                                                | Orange County Public Health Lab<br>Santa Clara County Public Health Laboratory<br>Madera County Department of Public Health                                                                                                           | Chan-Zuckerberg Biohub<br>Chan-Zuckerberg Biohub<br>Chan-Zuckerberg Biohub                                                     | CZB Cliahub Consortium<br>CZB Cliahub Consortium<br>CZB Cliahub Consortium                                                     |
| EPI_ISL_738709<br>EPI_ISL_738710<br>EPI_ISL_738711                                                                                                                                                                | Orange County Public Health Lab<br>Santa Clara County Public Health Laboratory<br>Alameda County Public Health Lab                                                                                                                    | Chan-Zuckerberg Biohub<br>Chan-Zuckerberg Biohub<br>Chan-Zuckerberg Biohub                                                     | CZB Cliahub Consortium<br>CZB Cliahub Consortium<br>CZB Cliahub Consortium                                                     |
| EPI_ISL_738712, EPI_ISL_738713,<br>EPI_ISL_738714                                                                                                                                                                 | Renegade                                                                                                                                                                                                                              | Chan-Zuckerberg Biohub                                                                                                         | CZB Cliahub Consortium                                                                                                         |
| EPI_ISL_738716, EPI_ISL_738717,<br>EPI_ISL_738718, EPI_ISL_738719,<br>EPI_ISL_738720                                                                                                                              | Santa Clara County Public Health Laboratory                                                                                                                                                                                           | Chan-Zuckerberg Biohub                                                                                                         | CZB Cliahub Consortium                                                                                                         |
| EPI_ISL_738721<br>EPI_ISL_738722                                                                                                                                                                                  | Alameda County Public Health Lab<br>Orange County Public Health Lab                                                                                                                                                                   | Chan-Zuckerberg Biohub<br>Chan-Zuckerberg Biohub                                                                               | CZB Cliahub Consortium<br>CZB Cliahub Consortium                                                                               |
| EPI_ISL_738723, EPI_ISL_738725<br>EPI_ISL_738726<br>EPI_ISL_738727                                                                                                                                                | Renegade<br>Santa Clara County Public Health Laboratory<br>Renegade                                                                                                                                                                   | Chan-Zuckerberg Biohub<br>Chan-Zuckerberg Biohub<br>Chan-Zuckerberg Biohub                                                     | CZB Cliahub Consortium<br>CZB Cliahub Consortium<br>CZB Cliahub Consortium                                                     |
| EPI_ISL_738728<br>EPI_ISL_738729<br>EPI_ISL_738730                                                                                                                                                                | Santa Clara County Public Health Laboratory<br>Orange County Public Health Lab<br>Santa Clara County Public Health Laboratory                                                                                                         | Chan-Zuckerberg Biohub<br>Chan-Zuckerberg Biohub<br>Chan-Zuckerberg Biohub                                                     | CZB Cliahub Consortium<br>CZB Cliahub Consortium<br>CZB Cliahub Consortium                                                     |
| EPI_ISL_738731, EPI_ISL_738732, EPI_ISL_738733, EPI_ISL_738734, EPI_ISL_738735, EPI_ISL_738736, EPI_ISL_738737, EPI_ISL_738738, EPI_ISL_738739, EPI_ISL_738740, EPI_ISL_738741<br><br>see above<br>EPI_ISL_738742 | Orange County Public Health Lab<br>Humboldt County Public Health Laboratory<br>Alameda County Public Health Lab                                                                                                                       | Chan-Zuckerberg Biohub<br>Chan-Zuckerberg Biohub<br>Chan-Zuckerberg Biohub                                                     | CZB Cliahub Consortium<br>CZB Cliahub Consortium<br>CZB Cliahub Consortium                                                     |
| EPI_ISL_738743, EPI_ISL_738744,<br>EPI_ISL_738745                                                                                                                                                                 | Alameda County Public Health Lab                                                                                                                                                                                                      | Chan-Zuckerberg Biohub                                                                                                         | CZB Cliahub Consortium                                                                                                         |
| EPI_ISL_738746, EPI_ISL_738747<br>EPI_ISL_738748<br>EPI_ISL_738750<br>EPI_ISL_738752<br>EPI_ISL_738754                                                                                                            | Santa Clara County Public Health Laboratory<br>Alameda County Public Health Lab<br>Santa Clara County Public Health Laboratory<br>Orange County Public Health Lab<br>Napa-Solano-Yolo- Marin County (NSYM) Public Health Laboratories | Chan-Zuckerberg Biohub<br>Chan-Zuckerberg Biohub<br>Chan-Zuckerberg Biohub<br>Chan-Zuckerberg Biohub<br>Chan-Zuckerberg Biohub | CZB Cliahub Consortium<br>CZB Cliahub Consortium<br>CZB Cliahub Consortium<br>CZB Cliahub Consortium<br>CZB Cliahub Consortium |
| EPI_ISL_738755<br>EPI_ISL_738756                                                                                                                                                                                  | Orange County Public Health Lab<br>Humboldt County Public Health Laboratory                                                                                                                                                           | Chan-Zuckerberg Biohub<br>Chan-Zuckerberg Biohub                                                                               | CZB Cliahub Consortium<br>CZB Cliahub Consortium                                                                               |
| EPI_ISL_738757, EPI_ISL_738758<br>EPI_ISL_738759                                                                                                                                                                  | Orange County Public Health Lab<br>Humboldt County Public Health Laboratory                                                                                                                                                           | Chan-Zuckerberg Biohub<br>Chan-Zuckerberg Biohub                                                                               | CZB Cliahub Consortium<br>CZB Cliahub Consortium                                                                               |
| EPI_ISL_738761, EPI_ISL_738762<br>EPI_ISL_738763, EPI_ISL_738764,<br>EPI_ISL_738765                                                                                                                               | Orange County Public Health Lab<br>Santa Clara County Public Health Laboratory                                                                                                                                                        | Chan-Zuckerberg Biohub<br>Chan-Zuckerberg Biohub                                                                               | CZB Cliahub Consortium<br>CZB Cliahub Consortium                                                                               |
| EPI_ISL_738766, EPI_ISL_738767<br>EPI_ISL_738769<br>EPI_ISL_738770                                                                                                                                                | Alameda County Public Health Lab<br>Santa Clara County Public Health Laboratory<br>Renegade                                                                                                                                           | Chan-Zuckerberg Biohub<br>Chan-Zuckerberg Biohub<br>Chan-Zuckerberg Biohub                                                     | CZB Cliahub Consortium<br>CZB Cliahub Consortium<br>CZB Cliahub Consortium                                                     |
| EPI_ISL_738771, EPI_ISL_738772<br>EPI_ISL_738774, EPI_ISL_738776<br>EPI_ISL_738778, EPI_ISL_738779                                                                                                                | Santa Clara County Public Health Laboratory<br>Alameda County Public Health Lab<br>Humboldt County Public Health Laboratory                                                                                                           | Chan-Zuckerberg Biohub<br>Chan-Zuckerberg Biohub<br>Chan-Zuckerberg Biohub                                                     | CZB Cliahub Consortium<br>CZB Cliahub Consortium<br>CZB Cliahub Consortium                                                     |
| EPI_ISL_738780<br>EPI_ISL_738782<br>EPI_ISL_738783<br>EPI_ISL_738784                                                                                                                                              | Santa Clara County Public Health Laboratory<br>Orange County Public Health Lab<br>Alameda County Public Health Lab<br>Orange County Public Health Lab                                                                                 | Chan-Zuckerberg Biohub<br>Chan-Zuckerberg Biohub<br>Chan-Zuckerberg Biohub<br>Chan-Zuckerberg Biohub                           | CZB Cliahub Consortium<br>CZB Cliahub Consortium<br>CZB Cliahub Consortium<br>CZB Cliahub Consortium                           |
| EPI_ISL_738785, EPI_ISL_738786<br>EPI_ISL_738787<br>EPI_ISL_738789<br>EPI_ISL_738790<br>EPI_ISL_738791                                                                                                            | Humboldt County Public Health Laboratory<br>Orange County Public Health Lab<br>Santa Clara County Public Health Laboratory<br>Orange County Public Health Lab<br>Santa Clara County Public Health Laboratory                          | Chan-Zuckerberg Biohub<br>Chan-Zuckerberg Biohub<br>Chan-Zuckerberg Biohub<br>Chan-Zuckerberg Biohub<br>Chan-Zuckerberg Biohub | CZB Cliahub Consortium<br>CZB Cliahub Consortium<br>CZB Cliahub Consortium<br>CZB Cliahub Consortium<br>CZB Cliahub Consortium |
| EPI_ISL_738792, EPI_ISL_738793<br>EPI_ISL_738794<br>EPI_ISL_738795                                                                                                                                                | Alameda County Public Health Lab<br>Santa Clara County Public Health Laboratory<br>Humboldt County Public Health Laboratory                                                                                                           | Chan-Zuckerberg Biohub<br>Chan-Zuckerberg Biohub<br>Chan-Zuckerberg Biohub                                                     | CZB Cliahub Consortium<br>CZB Cliahub Consortium<br>CZB Cliahub Consortium                                                     |
| EPI_ISL_738796, EPI_ISL_738797<br>EPI_ISL_738798<br>EPI_ISL_738799                                                                                                                                                | Alameda County Public Health Lab<br>Santa Clara County Public Health Laboratory<br>Orange County Public Health Lab                                                                                                                    | Chan-Zuckerberg Biohub<br>Chan-Zuckerberg Biohub<br>Chan-Zuckerberg Biohub                                                     | CZB Cliahub Consortium<br>CZB Cliahub Consortium<br>CZB Cliahub Consortium                                                     |

[illegible]

[illegible]

[illegible]

[illegible]

[illegible]

[illegible]



[illegible]

[illegible]

[illegible]

[illegible]

[illegible]

|                                                                                                                                                                                                                                                                                                                                                                                                                                                                                                                                                                                                                                                                                                                                                                                                                                                                                                                                                                                                                                                                                                                                                                                                                                                                                                                                                                                                                                                                                                                                                                                                                                                                                                                                                                                                                                                                                                                                                                                                                                                                                                                                                                                                                                                                                                                                                                                                                                                                                                                                                                                                                                                                                                                                                                                                                                                                                                                                                                                                                                                                                                                |                                                                                                                            |                                                                                                                                                                                                                                                                                                                                                                                                                                                                                                                                                                                 |                                                                                                                                                                                                                                                                                                                                                                                                                                                                                                                                                                                 |
|----------------------------------------------------------------------------------------------------------------------------------------------------------------------------------------------------------------------------------------------------------------------------------------------------------------------------------------------------------------------------------------------------------------------------------------------------------------------------------------------------------------------------------------------------------------------------------------------------------------------------------------------------------------------------------------------------------------------------------------------------------------------------------------------------------------------------------------------------------------------------------------------------------------------------------------------------------------------------------------------------------------------------------------------------------------------------------------------------------------------------------------------------------------------------------------------------------------------------------------------------------------------------------------------------------------------------------------------------------------------------------------------------------------------------------------------------------------------------------------------------------------------------------------------------------------------------------------------------------------------------------------------------------------------------------------------------------------------------------------------------------------------------------------------------------------------------------------------------------------------------------------------------------------------------------------------------------------------------------------------------------------------------------------------------------------------------------------------------------------------------------------------------------------------------------------------------------------------------------------------------------------------------------------------------------------------------------------------------------------------------------------------------------------------------------------------------------------------------------------------------------------------------------------------------------------------------------------------------------------------------------------------------------------------------------------------------------------------------------------------------------------------------------------------------------------------------------------------------------------------------------------------------------------------------------------------------------------------------------------------------------------------------------------------------------------------------------------------------------------|----------------------------------------------------------------------------------------------------------------------------|---------------------------------------------------------------------------------------------------------------------------------------------------------------------------------------------------------------------------------------------------------------------------------------------------------------------------------------------------------------------------------------------------------------------------------------------------------------------------------------------------------------------------------------------------------------------------------|---------------------------------------------------------------------------------------------------------------------------------------------------------------------------------------------------------------------------------------------------------------------------------------------------------------------------------------------------------------------------------------------------------------------------------------------------------------------------------------------------------------------------------------------------------------------------------|
| EPI_ISL_755134, EPI_ISL_755135, EPI_ISL_755136                                                                                                                                                                                                                                                                                                                                                                                                                                                                                                                                                                                                                                                                                                                                                                                                                                                                                                                                                                                                                                                                                                                                                                                                                                                                                                                                                                                                                                                                                                                                                                                                                                                                                                                                                                                                                                                                                                                                                                                                                                                                                                                                                                                                                                                                                                                                                                                                                                                                                                                                                                                                                                                                                                                                                                                                                                                                                                                                                                                                                                                                 | San Diego County Public Health Laboratory                                                                                  | Andersen lab at Scripps Research                                                                                                                                                                                                                                                                                                                                                                                                                                                                                                                                                | SEARCH Alliance San Diego with Tracy Basler, Jovan Shephard, Brett Austin                                                                                                                                                                                                                                                                                                                                                                                                                                                                                                       |
| EPI_ISL_755137                                                                                                                                                                                                                                                                                                                                                                                                                                                                                                                                                                                                                                                                                                                                                                                                                                                                                                                                                                                                                                                                                                                                                                                                                                                                                                                                                                                                                                                                                                                                                                                                                                                                                                                                                                                                                                                                                                                                                                                                                                                                                                                                                                                                                                                                                                                                                                                                                                                                                                                                                                                                                                                                                                                                                                                                                                                                                                                                                                                                                                                                                                 | UCSD EXCITE lab                                                                                                            | Andersen lab at Scripps Research                                                                                                                                                                                                                                                                                                                                                                                                                                                                                                                                                | SEARCH Alliance San Diego                                                                                                                                                                                                                                                                                                                                                                                                                                                                                                                                                       |
| EPI_ISL_755138, EPI_ISL_755139                                                                                                                                                                                                                                                                                                                                                                                                                                                                                                                                                                                                                                                                                                                                                                                                                                                                                                                                                                                                                                                                                                                                                                                                                                                                                                                                                                                                                                                                                                                                                                                                                                                                                                                                                                                                                                                                                                                                                                                                                                                                                                                                                                                                                                                                                                                                                                                                                                                                                                                                                                                                                                                                                                                                                                                                                                                                                                                                                                                                                                                                                 | San Diego County Public Health Laboratory                                                                                  | Andersen lab at Scripps Research                                                                                                                                                                                                                                                                                                                                                                                                                                                                                                                                                | SEARCH Alliance San Diego with Tracy Basler, Jovan Shephard, Brett Austin                                                                                                                                                                                                                                                                                                                                                                                                                                                                                                       |
| EPI_ISL_755140, EPI_ISL_755146, EPI_ISL_755147, EPI_ISL_755148, EPI_ISL_755149, EPI_ISL_755150, EPI_ISL_755151, EPI_ISL_755152, EPI_ISL_755153, EPI_ISL_755154, EPI_ISL_755155, EPI_ISL_755156, EPI_ISL_755157, EPI_ISL_755158, EPI_ISL_755159, EPI_ISL_755160, EPI_ISL_755161, EPI_ISL_755162, EPI_ISL_755163, EPI_ISL_755164, EPI_ISL_755165, EPI_ISL_755166, EPI_ISL_755167, EPI_ISL_755168, EPI_ISL_755169, EPI_ISL_755170, EPI_ISL_755171, EPI_ISL_755172, EPI_ISL_755173, EPI_ISL_755174, EPI_ISL_755175, EPI_ISL_755176, EPI_ISL_755177, EPI_ISL_755178, EPI_ISL_755179, EPI_ISL_755180, EPI_ISL_755181, EPI_ISL_755182, EPI_ISL_755183, EPI_ISL_755184, EPI_ISL_755185, EPI_ISL_755186, EPI_ISL_755187, EPI_ISL_755188, EPI_ISL_755189, EPI_ISL_755190, EPI_ISL_755191, EPI_ISL_755192, EPI_ISL_755193, EPI_ISL_755194, EPI_ISL_755195, EPI_ISL_755196, EPI_ISL_755197, EPI_ISL_755198, EPI_ISL_755199, EPI_ISL_755200, EPI_ISL_755201, EPI_ISL_755202, EPI_ISL_755203, EPI_ISL_755204, EPI_ISL_755205, EPI_ISL_755206, EPI_ISL_755207, EPI_ISL_755208, EPI_ISL_755209, EPI_ISL_755210, EPI_ISL_755211, EPI_ISL_755212, EPI_ISL_755217, EPI_ISL_755218, EPI_ISL_755219, EPI_ISL_755220, EPI_ISL_755221, EPI_ISL_755222, EPI_ISL_755223, EPI_ISL_755224, EPI_ISL_755225, EPI_ISL_755226, EPI_ISL_755227, EPI_ISL_755228, EPI_ISL_755229, EPI_ISL_755230, EPI_ISL_755231                                                                                                                                                                                                                                                                                                                                                                                                                                                                                                                                                                                                                                                                                                                                                                                                                                                                                                                                                                                                                                                                                                                                                                                                                                                                                                                                                                                                                                                                                                                                                                                                                                                                                                                                 | Andersen lab at Scripps Research                                                                                           | SEARCH Alliance San Diego                                                                                                                                                                                                                                                                                                                                                                                                                                                                                                                                                       |                                                                                                                                                                                                                                                                                                                                                                                                                                                                                                                                                                                 |
| see above                                                                                                                                                                                                                                                                                                                                                                                                                                                                                                                                                                                                                                                                                                                                                                                                                                                                                                                                                                                                                                                                                                                                                                                                                                                                                                                                                                                                                                                                                                                                                                                                                                                                                                                                                                                                                                                                                                                                                                                                                                                                                                                                                                                                                                                                                                                                                                                                                                                                                                                                                                                                                                                                                                                                                                                                                                                                                                                                                                                                                                                                                                      | UCSD EXCITE lab                                                                                                            | Andersen lab at Scripps Research                                                                                                                                                                                                                                                                                                                                                                                                                                                                                                                                                | SEARCH Alliance San Diego                                                                                                                                                                                                                                                                                                                                                                                                                                                                                                                                                       |
| EPI_ISL_755269, EPI_ISL_755270, EPI_ISL_755271, EPI_ISL_755272, EPI_ISL_755273, EPI_ISL_755274, EPI_ISL_755275, EPI_ISL_755276, EPI_ISL_755277, EPI_ISL_755278, EPI_ISL_755279, EPI_ISL_755280, EPI_ISL_755281, EPI_ISL_755282, EPI_ISL_755283, EPI_ISL_755284, EPI_ISL_755285, EPI_ISL_755286, EPI_ISL_755287, EPI_ISL_755288, EPI_ISL_755289, EPI_ISL_755290, EPI_ISL_755291, EPI_ISL_755292, EPI_ISL_755293, EPI_ISL_755294, EPI_ISL_755295, EPI_ISL_755296, EPI_ISL_755297, EPI_ISL_755298, EPI_ISL_755299, EPI_ISL_755300                                                                                                                                                                                                                                                                                                                                                                                                                                                                                                                                                                                                                                                                                                                                                                                                                                                                                                                                                                                                                                                                                                                                                                                                                                                                                                                                                                                                                                                                                                                                                                                                                                                                                                                                                                                                                                                                                                                                                                                                                                                                                                                                                                                                                                                                                                                                                                                                                                                                                                                                                                                 | Andersen lab at Scripps Research                                                                                           | SEARCH Alliance San Diego with Tracy Basler, Jovan Shephard, Brett Austin                                                                                                                                                                                                                                                                                                                                                                                                                                                                                                       |                                                                                                                                                                                                                                                                                                                                                                                                                                                                                                                                                                                 |
| see above                                                                                                                                                                                                                                                                                                                                                                                                                                                                                                                                                                                                                                                                                                                                                                                                                                                                                                                                                                                                                                                                                                                                                                                                                                                                                                                                                                                                                                                                                                                                                                                                                                                                                                                                                                                                                                                                                                                                                                                                                                                                                                                                                                                                                                                                                                                                                                                                                                                                                                                                                                                                                                                                                                                                                                                                                                                                                                                                                                                                                                                                                                      | San Diego County Public Health Laboratory                                                                                  | Andersen lab at Scripps Research                                                                                                                                                                                                                                                                                                                                                                                                                                                                                                                                                | SEARCH Alliance San Diego with Tracy Basler, Jovan Shephard, Brett Austin                                                                                                                                                                                                                                                                                                                                                                                                                                                                                                       |
| EPI_ISL_755594, EPI_ISL_755595, EPI_ISL_755596, EPI_ISL_755597, EPI_ISL_755602, EPI_ISL_755613                                                                                                                                                                                                                                                                                                                                                                                                                                                                                                                                                                                                                                                                                                                                                                                                                                                                                                                                                                                                                                                                                                                                                                                                                                                                                                                                                                                                                                                                                                                                                                                                                                                                                                                                                                                                                                                                                                                                                                                                                                                                                                                                                                                                                                                                                                                                                                                                                                                                                                                                                                                                                                                                                                                                                                                                                                                                                                                                                                                                                 | Helix/Illumina                                                                                                             | Genomics and Discovery, Respiratory Viruses Branch, Division of Viral Diseases, Centers for Disease Control and Prevention                                                                                                                                                                                                                                                                                                                                                                                                                                                      | Peter W. Cook, Dhwani Batra, Eileen de Feo, Jan Antico, Christine Tran, Matthew Tolentino, Shannon Wickline, Kim Gietzen, Brad Sickler, Jingtao Liu, Eric Allen, Phil Febbo, Summer Galloway, Nicole L. Washington, Simon White, Geraint Levan, Kelly Schiabor Barrett, Elizabeth Cirulli, Alexandre Bolze, Ary Ascencio, Charlotte Rivera-Garcia, Ryan Cho, Jason Nguyen, Sherry Wang, Jimmy Ramirez, Tyler Cassens, Efrén Sandoval, Magnus Isaksson, William Lee, David Becker, Marc Laurent, James Lu, Clinton R. Paden, Suxiang Tong, Duncan MacCannell                     |
| EPI_ISL_755940, EPI_ISL_755941, EPI_ISL_755942                                                                                                                                                                                                                                                                                                                                                                                                                                                                                                                                                                                                                                                                                                                                                                                                                                                                                                                                                                                                                                                                                                                                                                                                                                                                                                                                                                                                                                                                                                                                                                                                                                                                                                                                                                                                                                                                                                                                                                                                                                                                                                                                                                                                                                                                                                                                                                                                                                                                                                                                                                                                                                                                                                                                                                                                                                                                                                                                                                                                                                                                 | California Department of Public Health                                                                                     | Chiu Laboratory, University of California, San Francisco                                                                                                                                                                                                                                                                                                                                                                                                                                                                                                                        | Charles Chiu, Xianding (Wayne) Deng, Candace Wang, Jill Hacker, Debra Wadford                                                                                                                                                                                                                                                                                                                                                                                                                                                                                                   |
| EPI_ISL_756331, EPI_ISL_756332, EPI_ISL_756337                                                                                                                                                                                                                                                                                                                                                                                                                                                                                                                                                                                                                                                                                                                                                                                                                                                                                                                                                                                                                                                                                                                                                                                                                                                                                                                                                                                                                                                                                                                                                                                                                                                                                                                                                                                                                                                                                                                                                                                                                                                                                                                                                                                                                                                                                                                                                                                                                                                                                                                                                                                                                                                                                                                                                                                                                                                                                                                                                                                                                                                                 | Innovative Genomics Institute, UC Berkeley                                                                                 | Innovative Genomics Institute, UC Berkeley                                                                                                                                                                                                                                                                                                                                                                                                                                                                                                                                      | Stacia Wyman, Haridha Shivram, Phil Frankino, Liana Lareau, Shana McDevitt, Justin Choi                                                                                                                                                                                                                                                                                                                                                                                                                                                                                         |
| EPI_ISL_765987, EPI_ISL_765988, EPI_ISL_765989, EPI_ISL_765990, EPI_ISL_765991, EPI_ISL_765992, EPI_ISL_765993                                                                                                                                                                                                                                                                                                                                                                                                                                                                                                                                                                                                                                                                                                                                                                                                                                                                                                                                                                                                                                                                                                                                                                                                                                                                                                                                                                                                                                                                                                                                                                                                                                                                                                                                                                                                                                                                                                                                                                                                                                                                                                                                                                                                                                                                                                                                                                                                                                                                                                                                                                                                                                                                                                                                                                                                                                                                                                                                                                                                 | UCLA Clinical Micro Lab                                                                                                    | Los Angeles County PHL                                                                                                                                                                                                                                                                                                                                                                                                                                                                                                                                                          | P. Hemarajata et al.                                                                                                                                                                                                                                                                                                                                                                                                                                                                                                                                                            |
| EPI_ISL_765998, EPI_ISL_765999, EPI_ISL_766000, EPI_ISL_766001, EPI_ISL_766002, EPI_ISL_766003, EPI_ISL_766004, EPI_ISL_766005, EPI_ISL_766006, EPI_ISL_766007, EPI_ISL_766008, EPI_ISL_766009, EPI_ISL_766010, EPI_ISL_766011, EPI_ISL_766012, EPI_ISL_766013, EPI_ISL_766014, EPI_ISL_792655, EPI_ISL_792656, EPI_ISL_792657, EPI_ISL_792658, EPI_ISL_792659, EPI_ISL_792660, EPI_ISL_792661, EPI_ISL_792662, EPI_ISL_792663, EPI_ISL_792664, EPI_ISL_792665, EPI_ISL_792666, EPI_ISL_792667, EPI_ISL_792668, EPI_ISL_792669, EPI_ISL_792670, EPI_ISL_792671, EPI_ISL_792672, EPI_ISL_792673, EPI_ISL_792674, EPI_ISL_792675, EPI_ISL_792676, EPI_ISL_792677, EPI_ISL_792678                                                                                                                                                                                                                                                                                                                                                                                                                                                                                                                                                                                                                                                                                                                                                                                                                                                                                                                                                                                                                                                                                                                                                                                                                                                                                                                                                                                                                                                                                                                                                                                                                                                                                                                                                                                                                                                                                                                                                                                                                                                                                                                                                                                                                                                                                                                                                                                                                                 | Los Angeles County PHL                                                                                                     | Los Angeles County PHL                                                                                                                                                                                                                                                                                                                                                                                                                                                                                                                                                          | P. Hemarajata et al.                                                                                                                                                                                                                                                                                                                                                                                                                                                                                                                                                            |
| see above                                                                                                                                                                                                                                                                                                                                                                                                                                                                                                                                                                                                                                                                                                                                                                                                                                                                                                                                                                                                                                                                                                                                                                                                                                                                                                                                                                                                                                                                                                                                                                                                                                                                                                                                                                                                                                                                                                                                                                                                                                                                                                                                                                                                                                                                                                                                                                                                                                                                                                                                                                                                                                                                                                                                                                                                                                                                                                                                                                                                                                                                                                      | Los Angeles County PHL                                                                                                     | Los Angeles County PHL                                                                                                                                                                                                                                                                                                                                                                                                                                                                                                                                                          | P. Hemarajata et al.                                                                                                                                                                                                                                                                                                                                                                                                                                                                                                                                                            |
| EPI_ISL_792679                                                                                                                                                                                                                                                                                                                                                                                                                                                                                                                                                                                                                                                                                                                                                                                                                                                                                                                                                                                                                                                                                                                                                                                                                                                                                                                                                                                                                                                                                                                                                                                                                                                                                                                                                                                                                                                                                                                                                                                                                                                                                                                                                                                                                                                                                                                                                                                                                                                                                                                                                                                                                                                                                                                                                                                                                                                                                                                                                                                                                                                                                                 | Olive View Medical Center                                                                                                  | Los Angeles County PHL                                                                                                                                                                                                                                                                                                                                                                                                                                                                                                                                                          | P. Hemarajata et al.                                                                                                                                                                                                                                                                                                                                                                                                                                                                                                                                                            |
| EPI_ISL_802604, EPI_ISL_802605, EPI_ISL_802607, EPI_ISL_802608, EPI_ISL_802609, EPI_ISL_802610, EPI_ISL_802611, EPI_ISL_802612, EPI_ISL_802613, EPI_ISL_802614, EPI_ISL_802615, EPI_ISL_802616, EPI_ISL_802617, EPI_ISL_802618, EPI_ISL_802619, EPI_ISL_802620, EPI_ISL_802621, EPI_ISL_802622, EPI_ISL_802623, EPI_ISL_802624, EPI_ISL_802625, EPI_ISL_802626, EPI_ISL_802627, EPI_ISL_802628, EPI_ISL_802629, EPI_ISL_802630, EPI_ISL_802631, EPI_ISL_802632, EPI_ISL_802633, EPI_ISL_802634, EPI_ISL_802635, EPI_ISL_802636, EPI_ISL_802637, EPI_ISL_802638, EPI_ISL_802639, EPI_ISL_802640, EPI_ISL_802641, EPI_ISL_802642, EPI_ISL_802643, EPI_ISL_802644, EPI_ISL_802645, EPI_ISL_802646, EPI_ISL_802647, EPI_ISL_802648, EPI_ISL_802649, EPI_ISL_802650, EPI_ISL_802651, EPI_ISL_802652, EPI_ISL_802653, EPI_ISL_802654, EPI_ISL_802655, EPI_ISL_802656, EPI_ISL_802657, EPI_ISL_802658, EPI_ISL_802659, EPI_ISL_802660, EPI_ISL_802661, EPI_ISL_802662, EPI_ISL_802663, EPI_ISL_802664, EPI_ISL_802665, EPI_ISL_802720                                                                                                                                                                                                                                                                                                                                                                                                                                                                                                                                                                                                                                                                                                                                                                                                                                                                                                                                                                                                                                                                                                                                                                                                                                                                                                                                                                                                                                                                                                                                                                                                                                                                                                                                                                                                                                                                                                                                                                                                                                                                                 | Genomics and Discovery, Respiratory Viruses Branch, Division of Viral Diseases, Centers for Disease Control and Prevention | Peter W. Cook, Dhvani Batra, Ben L. Rambo-Martin Eileen de Feo, Jan Antico, Christine Tran, Matthew Tolentino, Shannon Wickline, Kim Gietzen, Brad Sickler, Jingtao Liu, Eric Allen, Phil Febbo, Summer Galloway, Nicole L. Washington, Simon White, Geraint Levan, Kelly Schiabor Barrett, Elizabeth Cirulli, Alexandre Bolze, Ary Ascencio, Charlotte Rivera-Garcia, Ryan Cho, Jason Nguyen, Sherry Wang, Jimmy Ramirez, Tyler Cassens, Efrén Sandoval, Magnus Isaksson, William Lee, David Becker, Marc Laurent, James Lu, Clinton R. Paden, Suxiang Tong, Duncan MacCannell |                                                                                                                                                                                                                                                                                                                                                                                                                                                                                                                                                                                 |
| see above                                                                                                                                                                                                                                                                                                                                                                                                                                                                                                                                                                                                                                                                                                                                                                                                                                                                                                                                                                                                                                                                                                                                                                                                                                                                                                                                                                                                                                                                                                                                                                                                                                                                                                                                                                                                                                                                                                                                                                                                                                                                                                                                                                                                                                                                                                                                                                                                                                                                                                                                                                                                                                                                                                                                                                                                                                                                                                                                                                                                                                                                                                      | Helix/Illumina                                                                                                             | Genomics and Discovery, Respiratory Viruses Branch, Division of Viral Diseases, Centers for Disease Control and Prevention                                                                                                                                                                                                                                                                                                                                                                                                                                                      | Peter W. Cook, Dhvani Batra, Ben L. Rambo-Martin Eileen de Feo, Jan Antico, Christine Tran, Matthew Tolentino, Shannon Wickline, Kim Gietzen, Brad Sickler, Jingtao Liu, Eric Allen, Phil Febbo, Summer Galloway, Nicole L. Washington, Simon White, Geraint Levan, Kelly Schiabor Barrett, Elizabeth Cirulli, Alexandre Bolze, Ary Ascencio, Charlotte Rivera-Garcia, Ryan Cho, Jason Nguyen, Sherry Wang, Jimmy Ramirez, Tyler Cassens, Efrén Sandoval, Magnus Isaksson, William Lee, David Becker, Marc Laurent, James Lu, Clinton R. Paden, Suxiang Tong, Duncan MacCannell |
| EPI_ISL_802996, EPI_ISL_802997, EPI_ISL_802998, EPI_ISL_802999, EPI_ISL_803000, EPI_ISL_803001, EPI_ISL_803002, EPI_ISL_803003, EPI_ISL_803004, EPI_ISL_803005, EPI_ISL_803006, EPI_ISL_803007, EPI_ISL_803008, EPI_ISL_803009, EPI_ISL_803010, EPI_ISL_803011, EPI_ISL_803012, EPI_ISL_803013, EPI_ISL_803014, EPI_ISL_803015, EPI_ISL_803016, EPI_ISL_803017, EPI_ISL_803018, EPI_ISL_803019, EPI_ISL_803020, EPI_ISL_803021, EPI_ISL_803022, EPI_ISL_803023, EPI_ISL_803024, EPI_ISL_803025, EPI_ISL_803026, EPI_ISL_803027, EPI_ISL_803028, EPI_ISL_803029, EPI_ISL_803030, EPI_ISL_803031, EPI_ISL_803032, EPI_ISL_803033, EPI_ISL_803034, EPI_ISL_803035, EPI_ISL_803036, EPI_ISL_803037, EPI_ISL_803038, EPI_ISL_803039, EPI_ISL_803040, EPI_ISL_803041, EPI_ISL_803042, EPI_ISL_803043, EPI_ISL_803044, EPI_ISL_803045, EPI_ISL_803046, EPI_ISL_803047, EPI_ISL_803048, EPI_ISL_803049, EPI_ISL_803050, EPI_ISL_803051, EPI_ISL_803052, EPI_ISL_803053, EPI_ISL_803054, EPI_ISL_803055, EPI_ISL_803056, EPI_ISL_803057, EPI_ISL_803058, EPI_ISL_803059, EPI_ISL_803060, EPI_ISL_803061, EPI_ISL_803062, EPI_ISL_803063, EPI_ISL_803064, EPI_ISL_803065, EPI_ISL_803066, EPI_ISL_803067, EPI_ISL_803068, EPI_ISL_803069, EPI_ISL_803070, EPI_ISL_803071, EPI_ISL_803072, EPI_ISL_803073, EPI_ISL_803074, EPI_ISL_803075, EPI_ISL_803076, EPI_ISL_803077, EPI_ISL_803078, EPI_ISL_803079, EPI_ISL_803080, EPI_ISL_803081, EPI_ISL_803082, EPI_ISL_803083, EPI_ISL_803084, EPI_ISL_803085, EPI_ISL_803086, EPI_ISL_803087, EPI_ISL_803088, EPI_ISL_803089, EPI_ISL_803090, EPI_ISL_803091, EPI_ISL_803092, EPI_ISL_803093, EPI_ISL_803094, EPI_ISL_803095, EPI_ISL_803096, EPI_ISL_803097                                                                                                                                                                                                                                                                                                                                                                                                                                                                                                                                                                                                                                                                                                                                                                                                                                                                                                                                                                                                                                                                                                                                                                                                                                                                                                                                                                                                                 | Quest Diagnostics                                                                                                          | Rosenthal,S.H., Gerasimova,A., Kagan,R.M., Anderson, B., Livingston, K.E., Hua, M., Liu Y., Shalhout, D.F., Owen, R., Lacbawan, F.                                                                                                                                                                                                                                                                                                                                                                                                                                              |                                                                                                                                                                                                                                                                                                                                                                                                                                                                                                                                                                                 |
| see above                                                                                                                                                                                                                                                                                                                                                                                                                                                                                                                                                                                                                                                                                                                                                                                                                                                                                                                                                                                                                                                                                                                                                                                                                                                                                                                                                                                                                                                                                                                                                                                                                                                                                                                                                                                                                                                                                                                                                                                                                                                                                                                                                                                                                                                                                                                                                                                                                                                                                                                                                                                                                                                                                                                                                                                                                                                                                                                                                                                                                                                                                                      | Quest Diagnostics                                                                                                          | Quest Diagnostics                                                                                                                                                                                                                                                                                                                                                                                                                                                                                                                                                               | Rosenthal,S.H., Gerasimova,A., Kagan,R.M., Anderson, B., Livingston, K.E., Hua, M., Liu Y., Shalhout, D.F., Owen, R., Lacbawan, F.                                                                                                                                                                                                                                                                                                                                                                                                                                              |
| EPI_ISL_806543                                                                                                                                                                                                                                                                                                                                                                                                                                                                                                                                                                                                                                                                                                                                                                                                                                                                                                                                                                                                                                                                                                                                                                                                                                                                                                                                                                                                                                                                                                                                                                                                                                                                                                                                                                                                                                                                                                                                                                                                                                                                                                                                                                                                                                                                                                                                                                                                                                                                                                                                                                                                                                                                                                                                                                                                                                                                                                                                                                                                                                                                                                 | Santa Clara County Public Health Laboratory                                                                                | Santa Clara County Public Health Laboratory                                                                                                                                                                                                                                                                                                                                                                                                                                                                                                                                     | Santa Clara Co Public Health Department                                                                                                                                                                                                                                                                                                                                                                                                                                                                                                                                         |
| EPI_ISL_806545                                                                                                                                                                                                                                                                                                                                                                                                                                                                                                                                                                                                                                                                                                                                                                                                                                                                                                                                                                                                                                                                                                                                                                                                                                                                                                                                                                                                                                                                                                                                                                                                                                                                                                                                                                                                                                                                                                                                                                                                                                                                                                                                                                                                                                                                                                                                                                                                                                                                                                                                                                                                                                                                                                                                                                                                                                                                                                                                                                                                                                                                                                 | Santa Clara County Public Health Laboratory                                                                                | Santa Clara County Public Health Laboratory                                                                                                                                                                                                                                                                                                                                                                                                                                                                                                                                     | Santa CLara County Public Health Department                                                                                                                                                                                                                                                                                                                                                                                                                                                                                                                                     |
| EPI_ISL_812115, EPI_ISL_812116, EPI_ISL_812119, EPI_ISL_812120, EPI_ISL_812121, EPI_ISL_812350, EPI_ISL_812351                                                                                                                                                                                                                                                                                                                                                                                                                                                                                                                                                                                                                                                                                                                                                                                                                                                                                                                                                                                                                                                                                                                                                                                                                                                                                                                                                                                                                                                                                                                                                                                                                                                                                                                                                                                                                                                                                                                                                                                                                                                                                                                                                                                                                                                                                                                                                                                                                                                                                                                                                                                                                                                                                                                                                                                                                                                                                                                                                                                                 | Santa Clara County Public Health Laboratory                                                                                | Santa Clara County Public Health Laboratory                                                                                                                                                                                                                                                                                                                                                                                                                                                                                                                                     | Santa Clara County Public Health Department                                                                                                                                                                                                                                                                                                                                                                                                                                                                                                                                     |
| EPI_ISL_812687                                                                                                                                                                                                                                                                                                                                                                                                                                                                                                                                                                                                                                                                                                                                                                                                                                                                                                                                                                                                                                                                                                                                                                                                                                                                                                                                                                                                                                                                                                                                                                                                                                                                                                                                                                                                                                                                                                                                                                                                                                                                                                                                                                                                                                                                                                                                                                                                                                                                                                                                                                                                                                                                                                                                                                                                                                                                                                                                                                                                                                                                                                 | United States Air Force School of Aerospace Medicine                                                                       | United States Air Force School of Aerospace Medicine                                                                                                                                                                                                                                                                                                                                                                                                                                                                                                                            | Anthony Fries, Jennifer Meyer, Amanda Javorina, Sarah Purves, William Gruner, Clarise Starr, Elizabeth Macias                                                                                                                                                                                                                                                                                                                                                                                                                                                                   |
| EPI_ISL_824390, EPI_ISL_824391, EPI_ISL_824392, EPI_ISL_824393, EPI_ISL_824394, EPI_ISL_824395, EPI_ISL_824396, EPI_ISL_824397, EPI_ISL_824398, EPI_ISL_824399, EPI_ISL_824400, EPI_ISL_824401, EPI_ISL_824402, EPI_ISL_824403, EPI_ISL_824404, EPI_ISL_824405, EPI_ISL_824406                                                                                                                                                                                                                                                                                                                                                                                                                                                                                                                                                                                                                                                                                                                                                                                                                                                                                                                                                                                                                                                                                                                                                                                                                                                                                                                                                                                                                                                                                                                                                                                                                                                                                                                                                                                                                                                                                                                                                                                                                                                                                                                                                                                                                                                                                                                                                                                                                                                                                                                                                                                                                                                                                                                                                                                                                                 | California Department of Public Health                                                                                     | California Department of Public Health                                                                                                                                                                                                                                                                                                                                                                                                                                                                                                                                          | CDPH IDLB COVIDNet                                                                                                                                                                                                                                                                                                                                                                                                                                                                                                                                                              |
| see above                                                                                                                                                                                                                                                                                                                                                                                                                                                                                                                                                                                                                                                                                                                                                                                                                                                                                                                                                                                                                                                                                                                                                                                                                                                                                                                                                                                                                                                                                                                                                                                                                                                                                                                                                                                                                                                                                                                                                                                                                                                                                                                                                                                                                                                                                                                                                                                                                                                                                                                                                                                                                                                                                                                                                                                                                                                                                                                                                                                                                                                                                                      | California Department of Public Health                                                                                     | California Department of Public Health                                                                                                                                                                                                                                                                                                                                                                                                                                                                                                                                          | CDPH IDLB COVIDNet                                                                                                                                                                                                                                                                                                                                                                                                                                                                                                                                                              |
| EPI_ISL_824555, EPI_ISL_824556, EPI_ISL_824557, EPI_ISL_824558, EPI_ISL_824559, EPI_ISL_824560, EPI_ISL_824561, EPI_ISL_824562, EPI_ISL_824563, EPI_ISL_824564, EPI_ISL_824565, EPI_ISL_824566, EPI_ISL_824567, EPI_ISL_824568, EPI_ISL_824569, EPI_ISL_824570, EPI_ISL_824571, EPI_ISL_824572, EPI_ISL_824573, EPI_ISL_824574, EPI_ISL_824575, EPI_ISL_824576, EPI_ISL_824577, EPI_ISL_824578, EPI_ISL_824579, EPI_ISL_824580, EPI_ISL_824581, EPI_ISL_824582, EPI_ISL_824583, EPI_ISL_824584, EPI_ISL_824585, EPI_ISL_824586, EPI_ISL_824587, EPI_ISL_824588, EPI_ISL_824589, EPI_ISL_824590, EPI_ISL_824591, EPI_ISL_824592, EPI_ISL_824593, EPI_ISL_824594, EPI_ISL_824595, EPI_ISL_824596, EPI_ISL_824597, EPI_ISL_824598, EPI_ISL_824599, EPI_ISL_824600, EPI_ISL_824601, EPI_ISL_824602, EPI_ISL_824603, EPI_ISL_824604, EPI_ISL_824605, EPI_ISL_824606, EPI_ISL_824607, EPI_ISL_824608, EPI_ISL_824609, EPI_ISL_824610, EPI_ISL_824611, EPI_ISL_824612, EPI_ISL_824613, EPI_ISL_824614, EPI_ISL_824615, EPI_ISL_824616, EPI_ISL_824617, EPI_ISL_824618, EPI_ISL_824619, EPI_ISL_824620, EPI_ISL_824621, EPI_ISL_824622, EPI_ISL_824623, EPI_ISL_824624, EPI_ISL_824625, EPI_ISL_824626, EPI_ISL_824627, EPI_ISL_824628, EPI_ISL_824629, EPI_ISL_824630, EPI_ISL_824631, EPI_ISL_824632, EPI_ISL_824633, EPI_ISL_824634, EPI_ISL_824635, EPI_ISL_824636, EPI_ISL_824637, EPI_ISL_824638, EPI_ISL_824639, EPI_ISL_824640, EPI_ISL_824641, EPI_ISL_824642, EPI_ISL_824643, EPI_ISL_824644, EPI_ISL_824645, EPI_ISL_824646, EPI_ISL_824647, EPI_ISL_824648, EPI_ISL_824649, EPI_ISL_824650, EPI_ISL_824651, EPI_ISL_824652, EPI_ISL_824653, EPI_ISL_824654, EPI_ISL_824655, EPI_ISL_824656, EPI_ISL_824657, EPI_ISL_824658, EPI_ISL_824659, EPI_ISL_824660, EPI_ISL_824661, EPI_ISL_824662, EPI_ISL_824663, EPI_ISL_824664, EPI_ISL_824665, EPI_ISL_824666, EPI_ISL_824667, EPI_ISL_824668, EPI_ISL_824669, EPI_ISL_824670, EPI_ISL_824671, EPI_ISL_824672, EPI_ISL_824673, EPI_ISL_824674, EPI_ISL_824675, EPI_ISL_824676, EPI_ISL_824677, EPI_ISL_824678, EPI_ISL_824679, EPI_ISL_824680, EPI_ISL_824681, EPI_ISL_824682, EPI_ISL_824683, EPI_ISL_824684, EPI_ISL_824685, EPI_ISL_824686, EPI_ISL_824687, EPI_ISL_824688, EPI_ISL_824689, EPI_ISL_824690, EPI_ISL_824691, EPI_ISL_824692, EPI_ISL_824693, EPI_ISL_824694, EPI_ISL_824695, EPI_ISL_824696, EPI_ISL_824697, EPI_ISL_824698, EPI_ISL_824699, EPI_ISL_824700, EPI_ISL_824701, EPI_ISL_824702, EPI_ISL_824703, EPI_ISL_824704, EPI_ISL_824705, EPI_ISL_824706, EPI_ISL_824707, EPI_ISL_824708, EPI_ISL_824709, EPI_ISL_824710, EPI_ISL_824711, EPI_ISL_824712, EPI_ISL_824713, EPI_ISL_824714, EPI_ISL_824715, EPI_ISL_824716, EPI_ISL_824717, EPI_ISL_824718, EPI_ISL_824719, EPI_ISL_824720, EPI_ISL_824721, EPI_ISL_824722, EPI_ISL_824723, EPI_ISL_824724, EPI_ISL_824725, EPI_ISL_824726, EPI_ISL_824727, EPI_ISL_824728, EPI_ISL_824729, EPI_ISL_824730, EPI_ISL_824731, EPI_ISL_824732, EPI_ISL_824733, EPI_ISL_824734, EPI_ISL_824735, EPI_ISL_824736, EPI_ISL_824737, EPI_ISL_824738, EPI_ISL_824739, EPI_ISL_824740, EPI_ISL_824741 | Cedars-Sinai Medical Center, Department of Pathology & Laboratory Medicine, Molecular Pathology Laboratory                 | Cedars-Sinai Medical Center, Molecular Pathology Laboratory of Department of Pathology & Laboratory Medicine and Genomic Core                                                                                                                                                                                                                                                                                                                                                                                                                                                   | Wenjuan Zhang, Brian Davis, Stephanie Chen, Jorge Mario Sincuir Martinez, Jasmine T Plummer, Eric Vail                                                                                                                                                                                                                                                                                                                                                                                                                                                                          |
| see above                                                                                                                                                                                                                                                                                                                                                                                                                                                                                                                                                                                                                                                                                                                                                                                                                                                                                                                                                                                                                                                                                                                                                                                                                                                                                                                                                                                                                                                                                                                                                                                                                                                                                                                                                                                                                                                                                                                                                                                                                                                                                                                                                                                                                                                                                                                                                                                                                                                                                                                                                                                                                                                                                                                                                                                                                                                                                                                                                                                                                                                                                                      | Cedars-Sinai Medical Center, Department of Pathology & Laboratory Medicine, Molecular Pathology Laboratory                 | Cedars-Sinai Medical Center, Molecular Pathology Laboratory of Department of Pathology & Laboratory Medicine and Genomic Core                                                                                                                                                                                                                                                                                                                                                                                                                                                   | Wenjuan Zhang, Brian Davis, Stephanie Chen, Jorge Mario Sincuir Martinez, Jasmine T Plummer, Eric Vail                                                                                                                                                                                                                                                                                                                                                                                                                                                                          |
| EPI_ISL_831648, EPI_ISL_831662, EPI_ISL_831684, EPI_ISL_831687                                                                                                                                                                                                                                                                                                                                                                                                                                                                                                                                                                                                                                                                                                                                                                                                                                                                                                                                                                                                                                                                                                                                                                                                                                                                                                                                                                                                                                                                                                                                                                                                                                                                                                                                                                                                                                                                                                                                                                                                                                                                                                                                                                                                                                                                                                                                                                                                                                                                                                                                                                                                                                                                                                                                                                                                                                                                                                                                                                                                                                                 | Santa Clara County Public Health Laboratory                                                                                | Santa Clara County Public Health Laboratory                                                                                                                                                                                                                                                                                                                                                                                                                                                                                                                                     | Santa Clara County Public Health Department                                                                                                                                                                                                                                                                                                                                                                                                                                                                                                                                     |
| EPI_ISL_831700, EPI_ISL_831737, EPI_ISL_831784, EPI_ISL_831816, EPI_ISL_831840, EPI_ISL_831849, EPI_ISL_831864, EPI_ISL_831880                                                                                                                                                                                                                                                                                                                                                                                                                                                                                                                                                                                                                                                                                                                                                                                                                                                                                                                                                                                                                                                                                                                                                                                                                                                                                                                                                                                                                                                                                                                                                                                                                                                                                                                                                                                                                                                                                                                                                                                                                                                                                                                                                                                                                                                                                                                                                                                                                                                                                                                                                                                                                                                                                                                                                                                                                                                                                                                                                                                 | United States Air Force School of Aerospace Medicine                                                                       | United States Air Force School of Aerospace Medicine                                                                                                                                                                                                                                                                                                                                                                                                                                                                                                                            | Anthony Fries, Jennifer Meyer, William Gruner, Amanda Javorina, Sarah Purves, Clarise Starr, Elizabeth Macias                                                                                                                                                                                                                                                                                                                                                                                                                                                                   |
| EPI_ISL_831893, EPI_ISL_831894, EPI_ISL_831895, EPI_ISL_831896, EPI_ISL_831897, EPI_ISL_831899, EPI_ISL_832066, EPI_ISL_832068, EPI_ISL_832075, EPI_ISL_832076, EPI_ISL_832078, EPI_ISL_832099                                                                                                                                                                                                                                                                                                                                                                                                                                                                                                                                                                                                                                                                                                                                                                                                                                                                                                                                                                                                                                                                                                                                                                                                                                                                                                                                                                                                                                                                                                                                                                                                                                                                                                                                                                                                                                                                                                                                                                                                                                                                                                                                                                                                                                                                                                                                                                                                                                                                                                                                                                                                                                                                                                                                                                                                                                                                                                                 |                                                                                                                            |                                                                                                                                                                                                                                                                                                                                                                                                                                                                                                                                                                                 |                                                                                                                                                                                                                                                                                                                                                                                                                                                                                                                                                                                 |

|                                                                                                                                                                                                                                                                                                                                                                                                                                                                                                                                                                                                                                                                                                                                                                                                                                                                                                                                                                                                                                                                                                                                                                                |                                                          |                                                          |                                                                                                                                                                                              |
|--------------------------------------------------------------------------------------------------------------------------------------------------------------------------------------------------------------------------------------------------------------------------------------------------------------------------------------------------------------------------------------------------------------------------------------------------------------------------------------------------------------------------------------------------------------------------------------------------------------------------------------------------------------------------------------------------------------------------------------------------------------------------------------------------------------------------------------------------------------------------------------------------------------------------------------------------------------------------------------------------------------------------------------------------------------------------------------------------------------------------------------------------------------------------------|----------------------------------------------------------|----------------------------------------------------------|----------------------------------------------------------------------------------------------------------------------------------------------------------------------------------------------|
| see above                                                                                                                                                                                                                                                                                                                                                                                                                                                                                                                                                                                                                                                                                                                                                                                                                                                                                                                                                                                                                                                                                                                                                                      | Santa Clara County Public Health Laboratory              | Santa Clara County Public Health Laboratory              | Santa Clara County Public Health Department                                                                                                                                                  |
| EPI_ISL_832105, EPI_ISL_832106, EPI_ISL_832107, EPI_ISL_832108, EPI_ISL_832109, EPI_ISL_832110, EPI_ISL_832111, EPI_ISL_832112, EPI_ISL_832113, EPI_ISL_832114, EPI_ISL_832115, EPI_ISL_832116, EPI_ISL_832117, EPI_ISL_832118, EPI_ISL_832119, EPI_ISL_832120                                                                                                                                                                                                                                                                                                                                                                                                                                                                                                                                                                                                                                                                                                                                                                                                                                                                                                                 |                                                          |                                                          |                                                                                                                                                                                              |
| see above                                                                                                                                                                                                                                                                                                                                                                                                                                                                                                                                                                                                                                                                                                                                                                                                                                                                                                                                                                                                                                                                                                                                                                      | MD Laboratories                                          | Los Angeles County PHL                                   | P. Hemarajata et al.                                                                                                                                                                         |
| EPI_ISL_832375, EPI_ISL_832376, EPI_ISL_832377, EPI_ISL_832379, EPI_ISL_832380, EPI_ISL_832381, EPI_ISL_832382, EPI_ISL_832383, EPI_ISL_832386, EPI_ISL_832387, EPI_ISL_832388, EPI_ISL_832391, EPI_ISL_832392, EPI_ISL_832394, EPI_ISL_832395, EPI_ISL_832396, EPI_ISL_832398, EPI_ISL_832399, EPI_ISL_832400, EPI_ISL_832401, EPI_ISL_832402, EPI_ISL_832403, EPI_ISL_832404                                                                                                                                                                                                                                                                                                                                                                                                                                                                                                                                                                                                                                                                                                                                                                                                 |                                                          |                                                          |                                                                                                                                                                                              |
| see above                                                                                                                                                                                                                                                                                                                                                                                                                                                                                                                                                                                                                                                                                                                                                                                                                                                                                                                                                                                                                                                                                                                                                                      | Santa Clara County Public Health Laboratory              | Santa Clara County Public Health Laboratory              | Santa Clara County Public Health Department                                                                                                                                                  |
| EPI_ISL_832675, EPI_ISL_832758                                                                                                                                                                                                                                                                                                                                                                                                                                                                                                                                                                                                                                                                                                                                                                                                                                                                                                                                                                                                                                                                                                                                                 | OHSU Lab Services Molecular Microbiology Lab             | Oregon SARS-CoV-2 Genome Sequencing Center               | Brendan L. O'Connell, Ruth V. Nichols, Sally Grindstaff, Alec J. Hirsch, Donna Hansel, Guang Fan, Daniel N. Streblow, William B. Messer, Andrew C. Adey, Benjamin N. Bimber, Brian J. O'Roak |
| EPI_ISL_845544                                                                                                                                                                                                                                                                                                                                                                                                                                                                                                                                                                                                                                                                                                                                                                                                                                                                                                                                                                                                                                                                                                                                                                 | Santa Clara County Public Health Laboratory              | Santa Clara County Public Health Laboratory              | Santa Clara County Public Health Department                                                                                                                                                  |
| EPI_ISL_845657, EPI_ISL_845659, EPI_ISL_845660, EPI_ISL_845661                                                                                                                                                                                                                                                                                                                                                                                                                                                                                                                                                                                                                                                                                                                                                                                                                                                                                                                                                                                                                                                                                                                 | Quest Diagnostics                                        | Quest Diagnostics                                        | Rosenthal,S.H., Gerasimova,A., Kagan,R.M., Anderson, B., Bernstein, L.E., Livingston, K.E., Hua, M., Liu Y., Shalhout, D.F., Shlyakhter, I.A., Owen, R., Lacbawan, F.                        |
| EPI_ISL_847515                                                                                                                                                                                                                                                                                                                                                                                                                                                                                                                                                                                                                                                                                                                                                                                                                                                                                                                                                                                                                                                                                                                                                                 | Chiu Laboratory, University of California, San Francisco | Chiu Laboratory, University of California, San Francisco | Charles Chiu, Xianding (Wayne) Deng, Candace Wang, Brian Bushnell, Scot Federman, Jill Hacker, Debra Wadford                                                                                 |
| EPI_ISL_847516                                                                                                                                                                                                                                                                                                                                                                                                                                                                                                                                                                                                                                                                                                                                                                                                                                                                                                                                                                                                                                                                                                                                                                 | California Department of Public Health                   | Chiu Laboratory, University of California, San Francisco | Charles Chiu, Xianding (Wayne) Deng, Candace Wang, Brian Bushnell, Scot Federman, Jill Hacker, Debra Wadford                                                                                 |
| EPI_ISL_847517                                                                                                                                                                                                                                                                                                                                                                                                                                                                                                                                                                                                                                                                                                                                                                                                                                                                                                                                                                                                                                                                                                                                                                 | Chiu Laboratory, University of California, San Francisco | Chiu Laboratory, University of California, San Francisco | Charles Chiu, Xianding (Wayne) Deng, Candace Wang, Brian Bushnell, Scot Federman, Jill Hacker, Debra Wadford                                                                                 |
| EPI_ISL_847518, EPI_ISL_847519, EPI_ISL_847520, EPI_ISL_847521, EPI_ISL_847522, EPI_ISL_847523, EPI_ISL_847524, EPI_ISL_847525, EPI_ISL_847526, EPI_ISL_847527, EPI_ISL_847528, EPI_ISL_847529, EPI_ISL_847530, EPI_ISL_847531, EPI_ISL_847532, EPI_ISL_847533, EPI_ISL_847534, EPI_ISL_847535                                                                                                                                                                                                                                                                                                                                                                                                                                                                                                                                                                                                                                                                                                                                                                                                                                                                                 | California Department of Public Health                   | Chiu Laboratory, University of California, San Francisco | Charles Chiu, Xianding (Wayne) Deng, Candace Wang, Brian Bushnell, Scot Federman, Jill Hacker, Debra Wadford                                                                                 |
| see above                                                                                                                                                                                                                                                                                                                                                                                                                                                                                                                                                                                                                                                                                                                                                                                                                                                                                                                                                                                                                                                                                                                                                                      | Chiu Laboratory, University of California, San Francisco | Chiu Laboratory, University of California, San Francisco | Charles Chiu, Xianding (Wayne) Deng, Candace Wang, Brian Bushnell, Scot Federman, Jill Hacker, Debra Wadford                                                                                 |
| EPI_ISL_847536                                                                                                                                                                                                                                                                                                                                                                                                                                                                                                                                                                                                                                                                                                                                                                                                                                                                                                                                                                                                                                                                                                                                                                 | California Department of Public Health                   | Chiu Laboratory, University of California, San Francisco | Charles Chiu, Xianding (Wayne) Deng, Candace Wang, Brian Bushnell, Scot Federman, Jill Hacker, Debra Wadford                                                                                 |
| EPI_ISL_847537, EPI_ISL_847538, EPI_ISL_847539                                                                                                                                                                                                                                                                                                                                                                                                                                                                                                                                                                                                                                                                                                                                                                                                                                                                                                                                                                                                                                                                                                                                 | Chiu Laboratory, University of California, San Francisco | Chiu Laboratory, University of California, San Francisco | Charles Chiu, Xianding (Wayne) Deng, Candace Wang, Brian Bushnell, Scot Federman, Jill Hacker, Debra Wadford                                                                                 |
| EPI_ISL_847540                                                                                                                                                                                                                                                                                                                                                                                                                                                                                                                                                                                                                                                                                                                                                                                                                                                                                                                                                                                                                                                                                                                                                                 | Chiu Laboratory, University of California, San Francisco | Chiu Laboratory, University of California, San Francisco | Charles Chiu, Xianding (Wayne) Deng, Candace Wang, Brian Bushnell, Scot Federman, Jill Hacker, Debra Wadford                                                                                 |
| EPI_ISL_847541, EPI_ISL_847542, EPI_ISL_847543, EPI_ISL_847544                                                                                                                                                                                                                                                                                                                                                                                                                                                                                                                                                                                                                                                                                                                                                                                                                                                                                                                                                                                                                                                                                                                 | California Department of Public Health                   | Chiu Laboratory, University of California, San Francisco | Charles Chiu, Xianding (Wayne) Deng, Candace Wang, Brian Bushnell, Scot Federman, Jill Hacker, Debra Wadford                                                                                 |
| EPI_ISL_847545, EPI_ISL_847546                                                                                                                                                                                                                                                                                                                                                                                                                                                                                                                                                                                                                                                                                                                                                                                                                                                                                                                                                                                                                                                                                                                                                 | Chiu Laboratory, University of California, San Francisco | Chiu Laboratory, University of California, San Francisco | Charles Chiu, Xianding (Wayne) Deng, Candace Wang, Brian Bushnell, Scot Federman, Jill Hacker, Debra Wadford                                                                                 |
| EPI_ISL_847547, EPI_ISL_847548, EPI_ISL_847549, EPI_ISL_847550, EPI_ISL_847551, EPI_ISL_847552                                                                                                                                                                                                                                                                                                                                                                                                                                                                                                                                                                                                                                                                                                                                                                                                                                                                                                                                                                                                                                                                                 | California Department of Public Health                   | Chiu Laboratory, University of California, San Francisco | Charles Chiu, Xianding (Wayne) Deng, Candace Wang, Brian Bushnell, Scot Federman, Jill Hacker, Debra Wadford                                                                                 |
| EPI_ISL_847553                                                                                                                                                                                                                                                                                                                                                                                                                                                                                                                                                                                                                                                                                                                                                                                                                                                                                                                                                                                                                                                                                                                                                                 | Chiu Laboratory, University of California, San Francisco | Chiu Laboratory, University of California, San Francisco | Charles Chiu, Xianding (Wayne) Deng, Candace Wang, Brian Bushnell, Scot Federman, Jill Hacker, Debra Wadford                                                                                 |
| EPI_ISL_847554, EPI_ISL_847555, EPI_ISL_847556, EPI_ISL_847557, EPI_ISL_847558, EPI_ISL_847559, EPI_ISL_847560, EPI_ISL_847561, EPI_ISL_847562                                                                                                                                                                                                                                                                                                                                                                                                                                                                                                                                                                                                                                                                                                                                                                                                                                                                                                                                                                                                                                 | California Department of Public Health                   | Chiu Laboratory, University of California, San Francisco | Charles Chiu, Xianding (Wayne) Deng, Candace Wang, Brian Bushnell, Scot Federman, Jill Hacker, Debra Wadford                                                                                 |
| EPI_ISL_847563                                                                                                                                                                                                                                                                                                                                                                                                                                                                                                                                                                                                                                                                                                                                                                                                                                                                                                                                                                                                                                                                                                                                                                 | Chiu Laboratory, University of California, San Francisco | Chiu Laboratory, University of California, San Francisco | Charles Chiu, Xianding (Wayne) Deng, Candace Wang, Brian Bushnell, Scot Federman, Jill Hacker, Debra Wadford                                                                                 |
| EPI_ISL_847565, EPI_ISL_847566, EPI_ISL_847567, EPI_ISL_847569, EPI_ISL_847570, EPI_ISL_847571, EPI_ISL_847572, EPI_ISL_847573, EPI_ISL_847574, EPI_ISL_847575, EPI_ISL_847576, EPI_ISL_847577, EPI_ISL_847578                                                                                                                                                                                                                                                                                                                                                                                                                                                                                                                                                                                                                                                                                                                                                                                                                                                                                                                                                                 | California Department of Public Health                   | Chiu Laboratory, University of California, San Francisco | Charles Chiu, Xianding (Wayne) Deng, Candace Wang, Brian Bushnell, Scot Federman, Jill Hacker, Debra Wadford                                                                                 |
| see above                                                                                                                                                                                                                                                                                                                                                                                                                                                                                                                                                                                                                                                                                                                                                                                                                                                                                                                                                                                                                                                                                                                                                                      | Chiu Laboratory, University of California, San Francisco | Chiu Laboratory, University of California, San Francisco | Charles Chiu, Xianding (Wayne) Deng, Candace Wang, Brian Bushnell, Scot Federman, Jill Hacker, Debra Wadford                                                                                 |
| EPI_ISL_847579                                                                                                                                                                                                                                                                                                                                                                                                                                                                                                                                                                                                                                                                                                                                                                                                                                                                                                                                                                                                                                                                                                                                                                 | Chiu Laboratory, University of California, San Francisco | Chiu Laboratory, University of California, San Francisco | Charles Chiu, Xianding (Wayne) Deng, Candace Wang, Brian Bushnell, Scot Federman, Jill Hacker, Debra Wadford                                                                                 |
| EPI_ISL_847580, EPI_ISL_847581, EPI_ISL_847582, EPI_ISL_847583, EPI_ISL_847584, EPI_ISL_847585, EPI_ISL_847586, EPI_ISL_847587, EPI_ISL_847588, EPI_ISL_847595, EPI_ISL_847596, EPI_ISL_847597, EPI_ISL_847598, EPI_ISL_847599, EPI_ISL_847600, EPI_ISL_847601, EPI_ISL_847602, EPI_ISL_847603, EPI_ISL_847604, EPI_ISL_847605, EPI_ISL_847606, EPI_ISL_847607, EPI_ISL_847608, EPI_ISL_847609, EPI_ISL_847610, EPI_ISL_847611, EPI_ISL_847612, EPI_ISL_847613, EPI_ISL_847614, EPI_ISL_847615, EPI_ISL_847616, EPI_ISL_847617, EPI_ISL_847618                                                                                                                                                                                                                                                                                                                                                                                                                                                                                                                                                                                                                                 | California Department of Public Health                   | Chiu Laboratory, University of California, San Francisco | Charles Chiu, Xianding (Wayne) Deng, Candace Wang, Brian Bushnell, Scot Federman, Jill Hacker, Debra Wadford                                                                                 |
| see above                                                                                                                                                                                                                                                                                                                                                                                                                                                                                                                                                                                                                                                                                                                                                                                                                                                                                                                                                                                                                                                                                                                                                                      | Chiu Laboratory, University of California, San Francisco | Chiu Laboratory, University of California, San Francisco | Charles Chiu, Xianding (Wayne) Deng, Candace Wang, Brian Bushnell, Scot Federman, Jill Hacker, Debra Wadford                                                                                 |
| EPI_ISL_847619, EPI_ISL_847620, EPI_ISL_847621, EPI_ISL_847622                                                                                                                                                                                                                                                                                                                                                                                                                                                                                                                                                                                                                                                                                                                                                                                                                                                                                                                                                                                                                                                                                                                 | Chiu Laboratory, University of California, San Francisco | Chiu Laboratory, University of California, San Francisco | Charles Chiu, Xianding (Wayne) Deng, Candace Wang, Brian Bushnell, Scot Federman, Jill Hacker, Debra Wadford                                                                                 |
| EPI_ISL_847623, EPI_ISL_847624, EPI_ISL_847625, EPI_ISL_847626, EPI_ISL_847627, EPI_ISL_847628, EPI_ISL_847629, EPI_ISL_847630, EPI_ISL_847631, EPI_ISL_847632, EPI_ISL_847633, EPI_ISL_847634, EPI_ISL_847635, EPI_ISL_847636, EPI_ISL_847637, EPI_ISL_847638, EPI_ISL_847639                                                                                                                                                                                                                                                                                                                                                                                                                                                                                                                                                                                                                                                                                                                                                                                                                                                                                                 | California Department of Public Health                   | Chiu Laboratory, University of California, San Francisco | Charles Chiu, Xianding (Wayne) Deng, Candace Wang, Brian Bushnell, Scot Federman, Jill Hacker, Debra Wadford                                                                                 |
| see above                                                                                                                                                                                                                                                                                                                                                                                                                                                                                                                                                                                                                                                                                                                                                                                                                                                                                                                                                                                                                                                                                                                                                                      | Chiu Laboratory, University of California, San Francisco | Chiu Laboratory, University of California, San Francisco | Charles Chiu, Xianding (Wayne) Deng, Candace Wang, Brian Bushnell, Scot Federman, Jill Hacker, Debra Wadford                                                                                 |
| EPI_ISL_847640, EPI_ISL_847641, EPI_ISL_847642, EPI_ISL_847643, EPI_ISL_847644                                                                                                                                                                                                                                                                                                                                                                                                                                                                                                                                                                                                                                                                                                                                                                                                                                                                                                                                                                                                                                                                                                 | Chiu Laboratory, University of California, San Francisco | Chiu Laboratory, University of California, San Francisco | Charles Chiu, Xianding (Wayne) Deng, Candace Wang, Brian Bushnell, Scot Federman, Jill Hacker, Debra Wadford                                                                                 |
| EPI_ISL_847645, EPI_ISL_847646, EPI_ISL_847647, EPI_ISL_847648, EPI_ISL_847649, EPI_ISL_847650, EPI_ISL_847651, EPI_ISL_847652, EPI_ISL_847653, EPI_ISL_847654, EPI_ISL_847655, EPI_ISL_847656, EPI_ISL_847657, EPI_ISL_847658, EPI_ISL_847659, EPI_ISL_847660, EPI_ISL_847661, EPI_ISL_847662, EPI_ISL_847663, EPI_ISL_847664, EPI_ISL_847665, EPI_ISL_847666, EPI_ISL_847667, EPI_ISL_847668, EPI_ISL_847669, EPI_ISL_847670, EPI_ISL_847671, EPI_ISL_847672, EPI_ISL_847673, EPI_ISL_847674, EPI_ISL_847675, EPI_ISL_847676, EPI_ISL_847677, EPI_ISL_847678, EPI_ISL_847679, EPI_ISL_847680, EPI_ISL_847681, EPI_ISL_847682, EPI_ISL_847683, EPI_ISL_847684, EPI_ISL_847685, EPI_ISL_847686, EPI_ISL_847687, EPI_ISL_847688, EPI_ISL_847689, EPI_ISL_847690, EPI_ISL_847691, EPI_ISL_847692, EPI_ISL_847693, EPI_ISL_847694, EPI_ISL_847695, EPI_ISL_847696, EPI_ISL_847697, EPI_ISL_847698, EPI_ISL_847699, EPI_ISL_847700, EPI_ISL_847701, EPI_ISL_847702, EPI_ISL_847703, EPI_ISL_847704, EPI_ISL_847705, EPI_ISL_847706, EPI_ISL_847707, EPI_ISL_847708, EPI_ISL_847709, EPI_ISL_847710, EPI_ISL_847711, EPI_ISL_847712, EPI_ISL_847713, EPI_ISL_847714, EPI_ISL_847715 | California Department of Public Health                   | Chiu Laboratory, University of California, San Francisco | Charles Chiu, Xianding (Wayne) Deng, Candace Wang, Brian Bushnell, Scot Federman, Jill Hacker, Debra Wadford                                                                                 |
| see above                                                                                                                                                                                                                                                                                                                                                                                                                                                                                                                                                                                                                                                                                                                                                                                                                                                                                                                                                                                                                                                                                                                                                                      | Chiu Laboratory, University of California, San Francisco | Chiu Laboratory, University of California, San Francisco | Charles Chiu, Xianding (Wayne) Deng, Candace Wang, Brian Bushnell, Scot Federman, Jill Hacker, Debra Wadford                                                                                 |
| EPI_ISL_847716                                                                                                                                                                                                                                                                                                                                                                                                                                                                                                                                                                                                                                                                                                                                                                                                                                                                                                                                                                                                                                                                                                                                                                 | California Department of Public Health                   | Chiu Laboratory, University of California, San Francisco | Charles Chiu, Xianding (Wayne) Deng, Candace Wang, Brian Bushnell, Scot Federman, Jill Hacker, Debra Wadford                                                                                 |
| EPI_ISL_847717, EPI_ISL_847718, EPI_ISL_847719                                                                                                                                                                                                                                                                                                                                                                                                                                                                                                                                                                                                                                                                                                                                                                                                                                                                                                                                                                                                                                                                                                                                 | Chiu Laboratory, University of California, San Francisco | Chiu Laboratory, University of California, San Francisco | Charles Chiu, Xianding (Wayne) Deng, Candace Wang, Brian Bushnell, Scot Federman, Jill Hacker, Debra Wadford                                                                                 |
| EPI_ISL_847720                                                                                                                                                                                                                                                                                                                                                                                                                                                                                                                                                                                                                                                                                                                                                                                                                                                                                                                                                                                                                                                                                                                                                                 | California Department of Public Health                   | Chiu Laboratory, University of California, San Francisco | Charles Chiu, Xianding (Wayne) Deng, Candace Wang, Brian Bushnell, Scot Federman, Jill Hacker, Debra Wadford                                                                                 |
| EPI_ISL_847721, EPI_ISL_847722, EPI_ISL_847723, EPI_ISL_847724, EPI_ISL_847725, EPI_ISL_847726, EPI_ISL_847727, EPI_ISL_847728, EPI_ISL_847729                                                                                                                                                                                                                                                                                                                                                                                                                                                                                                                                                                                                                                                                                                                                                                                                                                                                                                                                                                                                                                 | Chiu Laboratory, University of California, San Francisco | Chiu Laboratory, University of California, San Francisco | Charles Chiu, Xianding (Wayne) Deng, Candace Wang, Brian Bushnell, Scot Federman, Jill Hacker, Debra Wadford                                                                                 |
| EPI_ISL_847731                                                                                                                                                                                                                                                                                                                                                                                                                                                                                                                                                                                                                                                                                                                                                                                                                                                                                                                                                                                                                                                                                                                                                                 | California Department of Public Health                   | Chiu Laboratory, University of California, San Francisco | Charles Chiu, Xianding (Wayne) Deng, Candace Wang, Brian Bushnell, Scot Federman, Jill Hacker, Debra Wadford                                                                                 |
| EPI_ISL_847732, EPI_ISL_847733, EPI_ISL_847734, EPI_ISL_847735                                                                                                                                                                                                                                                                                                                                                                                                                                                                                                                                                                                                                                                                                                                                                                                                                                                                                                                                                                                                                                                                                                                 | Chiu Laboratory, University of California, San Francisco | Chiu Laboratory, University of California, San Francisco | Charles Chiu, Xianding (Wayne) Deng, Candace Wang, Brian Bushnell, Scot Federman, Jill Hacker, Debra Wadford                                                                                 |
| EPI_ISL_847736                                                                                                                                                                                                                                                                                                                                                                                                                                                                                                                                                                                                                                                                                                                                                                                                                                                                                                                                                                                                                                                                                                                                                                 | California Department of Public Health                   | Chiu Laboratory, University of California, San Francisco | Charles Chiu, Xianding (Wayne) Deng, Candace Wang, Brian Bushnell, Scot Federman, Jill Hacker, Debra Wadford                                                                                 |
| EPI_ISL_847737                                                                                                                                                                                                                                                                                                                                                                                                                                                                                                                                                                                                                                                                                                                                                                                                                                                                                                                                                                                                                                                                                                                                                                 | Chiu Laboratory, University of California, San Francisco | Chiu Laboratory, University of California, San Francisco | Charles Chiu, Xianding (Wayne) Deng, Candace Wang, Brian Bushnell, Scot Federman, Jill Hacker, Debra Wadford                                                                                 |
| EPI_ISL_847738                                                                                                                                                                                                                                                                                                                                                                                                                                                                                                                                                                                                                                                                                                                                                                                                                                                                                                                                                                                                                                                                                                                                                                 | California Department of Public Health                   | Chiu Laboratory, University of California, San Francisco | Charles Chiu, Xianding (Wayne) Deng, Candace Wang, Brian Bushnell, Scot Federman, Jill Hacker, Debra Wadford                                                                                 |
| EPI_ISL_847739, EPI_ISL_847740                                                                                                                                                                                                                                                                                                                                                                                                                                                                                                                                                                                                                                                                                                                                                                                                                                                                                                                                                                                                                                                                                                                                                 | Chiu Laboratory, University of California, San Francisco | Chiu Laboratory, University of California, San Francisco | Charles Chiu, Xianding (Wayne) Deng, Candace Wang, Brian Bushnell, Scot Federman, Jill Hacker, Debra Wadford                                                                                 |

|                                                                                                                                                                                                                                                                                                                                                                                                                                                                                                                                                                                                                                                                                                                                                                                                                                                                                                                                                                                                                                                                                                                                                                                                                                                                                                                                                                                                                                                                                                                                                                                                                                                                                                                                                                                                                                                                                                                                                                                                                                                                                                                                                                                                                                                                                                                                                                                                                                                                                                                                                                                                                                                                                |                                                           |                                                                                                              |                                                                                                                                                                                                                                                                                                                                                                                                                                                                                      |
|--------------------------------------------------------------------------------------------------------------------------------------------------------------------------------------------------------------------------------------------------------------------------------------------------------------------------------------------------------------------------------------------------------------------------------------------------------------------------------------------------------------------------------------------------------------------------------------------------------------------------------------------------------------------------------------------------------------------------------------------------------------------------------------------------------------------------------------------------------------------------------------------------------------------------------------------------------------------------------------------------------------------------------------------------------------------------------------------------------------------------------------------------------------------------------------------------------------------------------------------------------------------------------------------------------------------------------------------------------------------------------------------------------------------------------------------------------------------------------------------------------------------------------------------------------------------------------------------------------------------------------------------------------------------------------------------------------------------------------------------------------------------------------------------------------------------------------------------------------------------------------------------------------------------------------------------------------------------------------------------------------------------------------------------------------------------------------------------------------------------------------------------------------------------------------------------------------------------------------------------------------------------------------------------------------------------------------------------------------------------------------------------------------------------------------------------------------------------------------------------------------------------------------------------------------------------------------------------------------------------------------------------------------------------------------|-----------------------------------------------------------|--------------------------------------------------------------------------------------------------------------|--------------------------------------------------------------------------------------------------------------------------------------------------------------------------------------------------------------------------------------------------------------------------------------------------------------------------------------------------------------------------------------------------------------------------------------------------------------------------------------|
| EPI_ISL_847741, EPI_ISL_847742, EPI_ISL_847744                                                                                                                                                                                                                                                                                                                                                                                                                                                                                                                                                                                                                                                                                                                                                                                                                                                                                                                                                                                                                                                                                                                                                                                                                                                                                                                                                                                                                                                                                                                                                                                                                                                                                                                                                                                                                                                                                                                                                                                                                                                                                                                                                                                                                                                                                                                                                                                                                                                                                                                                                                                                                                 | Chiu Laboratory, University of California, San Francisco  | Chiu Laboratory, University of California, San Francisco                                                     | Charles Chiu, Xianding (Wayne) Deng, Candace Wang, Brian Bushnell, Scot Federman, Jill Hacker, Debra Wadford                                                                                                                                                                                                                                                                                                                                                                         |
| EPI_ISL_847745                                                                                                                                                                                                                                                                                                                                                                                                                                                                                                                                                                                                                                                                                                                                                                                                                                                                                                                                                                                                                                                                                                                                                                                                                                                                                                                                                                                                                                                                                                                                                                                                                                                                                                                                                                                                                                                                                                                                                                                                                                                                                                                                                                                                                                                                                                                                                                                                                                                                                                                                                                                                                                                                 | California Department of Public Health                    | Chiu Laboratory, University of California, San Francisco                                                     | Charles Chiu, Xianding (Wayne) Deng, Candace Wang, Brian Bushnell, Scot Federman, Jill Hacker, Debra Wadford                                                                                                                                                                                                                                                                                                                                                                         |
| EPI_ISL_847746, EPI_ISL_847747                                                                                                                                                                                                                                                                                                                                                                                                                                                                                                                                                                                                                                                                                                                                                                                                                                                                                                                                                                                                                                                                                                                                                                                                                                                                                                                                                                                                                                                                                                                                                                                                                                                                                                                                                                                                                                                                                                                                                                                                                                                                                                                                                                                                                                                                                                                                                                                                                                                                                                                                                                                                                                                 | Chiu Laboratory, University of California, San Francisco  | Chiu Laboratory, University of California, San Francisco                                                     | Charles Chiu, Xianding (Wayne) Deng, Candace Wang, Brian Bushnell, Scot Federman, Jill Hacker, Debra Wadford                                                                                                                                                                                                                                                                                                                                                                         |
| EPI_ISL_847748, EPI_ISL_847749, EPI_ISL_847750, EPI_ISL_847751, EPI_ISL_847752, EPI_ISL_847753, EPI_ISL_847754, EPI_ISL_847755, EPI_ISL_847756, EPI_ISL_847757, EPI_ISL_847760, EPI_ISL_847761, EPI_ISL_847762, EPI_ISL_847763, EPI_ISL_847764, EPI_ISL_847765, EPI_ISL_847766, EPI_ISL_847767, EPI_ISL_847768, EPI_ISL_847769, EPI_ISL_847770, EPI_ISL_847771, EPI_ISL_847772, EPI_ISL_847773, EPI_ISL_847774, EPI_ISL_847775, EPI_ISL_847776, EPI_ISL_847777, EPI_ISL_847778, EPI_ISL_847779, EPI_ISL_847780, EPI_ISL_847781                                                                                                                                                                                                                                                                                                                                                                                                                                                                                                                                                                                                                                                                                                                                                                                                                                                                                                                                                                                                                                                                                                                                                                                                                                                                                                                                                                                                                                                                                                                                                                                                                                                                                                                                                                                                                                                                                                                                                                                                                                                                                                                                                 | Chiu Laboratory, University of California, San Francisco  | Charles Chiu, Xianding (Wayne) Deng, Candace Wang, Brian Bushnell, Scot Federman, Jill Hacker, Debra Wadford |                                                                                                                                                                                                                                                                                                                                                                                                                                                                                      |
| see above                                                                                                                                                                                                                                                                                                                                                                                                                                                                                                                                                                                                                                                                                                                                                                                                                                                                                                                                                                                                                                                                                                                                                                                                                                                                                                                                                                                                                                                                                                                                                                                                                                                                                                                                                                                                                                                                                                                                                                                                                                                                                                                                                                                                                                                                                                                                                                                                                                                                                                                                                                                                                                                                      | California Department of Public Health                    | Chiu Laboratory, University of California, San Francisco                                                     | Charles Chiu, Xianding (Wayne) Deng, Candace Wang, Brian Bushnell, Scot Federman, Jill Hacker, Debra Wadford                                                                                                                                                                                                                                                                                                                                                                         |
| EPI_ISL_847782                                                                                                                                                                                                                                                                                                                                                                                                                                                                                                                                                                                                                                                                                                                                                                                                                                                                                                                                                                                                                                                                                                                                                                                                                                                                                                                                                                                                                                                                                                                                                                                                                                                                                                                                                                                                                                                                                                                                                                                                                                                                                                                                                                                                                                                                                                                                                                                                                                                                                                                                                                                                                                                                 | Chiu Laboratory, University of California, San Francisco  | Chiu Laboratory, University of California, San Francisco                                                     | Charles Chiu, Xianding (Wayne) Deng, Candace Wang, Brian Bushnell, Scot Federman, Jill Hacker, Debra Wadford                                                                                                                                                                                                                                                                                                                                                                         |
| EPI_ISL_847783, EPI_ISL_847784, EPI_ISL_847785, EPI_ISL_847786, EPI_ISL_847787, EPI_ISL_847788, EPI_ISL_847789, EPI_ISL_847790, EPI_ISL_847791, EPI_ISL_847792, EPI_ISL_847793, EPI_ISL_847794, EPI_ISL_847795, EPI_ISL_847796, EPI_ISL_847797, EPI_ISL_847798, EPI_ISL_847799, EPI_ISL_847800, EPI_ISL_847801, EPI_ISL_847802, EPI_ISL_847803, EPI_ISL_847804, EPI_ISL_847805, EPI_ISL_847806, EPI_ISL_847807, EPI_ISL_847808, EPI_ISL_847809, EPI_ISL_847810, EPI_ISL_847811, EPI_ISL_847812, EPI_ISL_847813, EPI_ISL_847814, EPI_ISL_847815, EPI_ISL_847816, EPI_ISL_847817, EPI_ISL_847818                                                                                                                                                                                                                                                                                                                                                                                                                                                                                                                                                                                                                                                                                                                                                                                                                                                                                                                                                                                                                                                                                                                                                                                                                                                                                                                                                                                                                                                                                                                                                                                                                                                                                                                                                                                                                                                                                                                                                                                                                                                                                 | Chiu Laboratory, University of California, San Francisco  | Charles Chiu, Xianding (Wayne) Deng, Candace Wang, Brian Bushnell, Scot Federman, Jill Hacker, Debra Wadford |                                                                                                                                                                                                                                                                                                                                                                                                                                                                                      |
| see above                                                                                                                                                                                                                                                                                                                                                                                                                                                                                                                                                                                                                                                                                                                                                                                                                                                                                                                                                                                                                                                                                                                                                                                                                                                                                                                                                                                                                                                                                                                                                                                                                                                                                                                                                                                                                                                                                                                                                                                                                                                                                                                                                                                                                                                                                                                                                                                                                                                                                                                                                                                                                                                                      | California Department of Public Health                    | Chiu Laboratory, University of California, San Francisco                                                     | Charles Chiu, Xianding (Wayne) Deng, Candace Wang, Brian Bushnell, Scot Federman, Jill Hacker, Debra Wadford                                                                                                                                                                                                                                                                                                                                                                         |
| EPI_ISL_849577                                                                                                                                                                                                                                                                                                                                                                                                                                                                                                                                                                                                                                                                                                                                                                                                                                                                                                                                                                                                                                                                                                                                                                                                                                                                                                                                                                                                                                                                                                                                                                                                                                                                                                                                                                                                                                                                                                                                                                                                                                                                                                                                                                                                                                                                                                                                                                                                                                                                                                                                                                                                                                                                 | Washington State Department of Health                     | Seattle Flu Study                                                                                            | Deborah A. Nickerson, Chris D. Frazier, Jover Lee, Benjamin Pelle, Matthew Richardson, Amanda Adler, Elisabeth Brandstetter, Peter D. Han, Kairsten Fay, Misja Ilicsin, Kirsten Lacombe, Thomas R. Sibley, Melissa Truong, Caitlin R. Wolf, Romesh Gautam, Geoff Melly, Brian Hiatt, Philip Dykema, Scott Lindquist, Michael Boeckh, Janet A. Englund, Michael Famulare, Barry R. Lutz, Mark J. Rieder, Lea M. Starita, Matthew Thompson, Helen Y. Chu, Jay Shendure, Trevor Bedford |
| EPI_ISL_849926                                                                                                                                                                                                                                                                                                                                                                                                                                                                                                                                                                                                                                                                                                                                                                                                                                                                                                                                                                                                                                                                                                                                                                                                                                                                                                                                                                                                                                                                                                                                                                                                                                                                                                                                                                                                                                                                                                                                                                                                                                                                                                                                                                                                                                                                                                                                                                                                                                                                                                                                                                                                                                                                 | UCSF Clinical Microbiology Laboratory                     | Chan-Zuckerberg Biohub                                                                                       | CZB Cliahub Consortium                                                                                                                                                                                                                                                                                                                                                                                                                                                               |
| EPI_ISL_849939, EPI_ISL_849940, EPI_ISL_849941, EPI_ISL_849942, EPI_ISL_849943, EPI_ISL_849944, EPI_ISL_849945, EPI_ISL_849946, EPI_ISL_849948, EPI_ISL_849950, EPI_ISL_849951, EPI_ISL_849952                                                                                                                                                                                                                                                                                                                                                                                                                                                                                                                                                                                                                                                                                                                                                                                                                                                                                                                                                                                                                                                                                                                                                                                                                                                                                                                                                                                                                                                                                                                                                                                                                                                                                                                                                                                                                                                                                                                                                                                                                                                                                                                                                                                                                                                                                                                                                                                                                                                                                 | UC Davis- Department of Pathology and Laboratory Medicine | Chan-Zuckerberg Biohub                                                                                       | CZB Cliahub Consortium                                                                                                                                                                                                                                                                                                                                                                                                                                                               |
| see above                                                                                                                                                                                                                                                                                                                                                                                                                                                                                                                                                                                                                                                                                                                                                                                                                                                                                                                                                                                                                                                                                                                                                                                                                                                                                                                                                                                                                                                                                                                                                                                                                                                                                                                                                                                                                                                                                                                                                                                                                                                                                                                                                                                                                                                                                                                                                                                                                                                                                                                                                                                                                                                                      | UC Davis- Department of Pathology and Laboratory Medicine | Chan-Zuckerberg Biohub                                                                                       | CZB Cliahub Consortium                                                                                                                                                                                                                                                                                                                                                                                                                                                               |
| EPI_ISL_849953, EPI_ISL_849954, EPI_ISL_849955, EPI_ISL_849956, EPI_ISL_849957, EPI_ISL_849958, EPI_ISL_849959, EPI_ISL_849960, EPI_ISL_849961, EPI_ISL_849962, EPI_ISL_849963, EPI_ISL_849964, EPI_ISL_849965, EPI_ISL_849966, EPI_ISL_849967, EPI_ISL_849968, EPI_ISL_849969, EPI_ISL_849970, EPI_ISL_849971, EPI_ISL_849972, EPI_ISL_849973, EPI_ISL_849974, EPI_ISL_849975, EPI_ISL_849976, EPI_ISL_849977, EPI_ISL_849978, EPI_ISL_849979, EPI_ISL_849980, EPI_ISL_849981, EPI_ISL_849982, EPI_ISL_849983, EPI_ISL_849984, EPI_ISL_849985, EPI_ISL_849986, EPI_ISL_849987, EPI_ISL_849988, EPI_ISL_849989, EPI_ISL_849990, EPI_ISL_849991, EPI_ISL_849992, EPI_ISL_849993, EPI_ISL_849994, EPI_ISL_849995, EPI_ISL_849996, EPI_ISL_849997, EPI_ISL_849998, EPI_ISL_849999, EPI_ISL_850000, EPI_ISL_850001, EPI_ISL_850002, EPI_ISL_850003, EPI_ISL_850004, EPI_ISL_850005, EPI_ISL_850006, EPI_ISL_850007, EPI_ISL_850008, EPI_ISL_850009, EPI_ISL_850010, EPI_ISL_850011, EPI_ISL_850012, EPI_ISL_850013, EPI_ISL_850014, EPI_ISL_850015, EPI_ISL_850016, EPI_ISL_850017, EPI_ISL_850018                                                                                                                                                                                                                                                                                                                                                                                                                                                                                                                                                                                                                                                                                                                                                                                                                                                                                                                                                                                                                                                                                                                                                                                                                                                                                                                                                                                                                                                                                                                                                                                 | Chan-Zuckerberg Biohub                                    | CZB Cliahub Consortium                                                                                       |                                                                                                                                                                                                                                                                                                                                                                                                                                                                                      |
| see above                                                                                                                                                                                                                                                                                                                                                                                                                                                                                                                                                                                                                                                                                                                                                                                                                                                                                                                                                                                                                                                                                                                                                                                                                                                                                                                                                                                                                                                                                                                                                                                                                                                                                                                                                                                                                                                                                                                                                                                                                                                                                                                                                                                                                                                                                                                                                                                                                                                                                                                                                                                                                                                                      | Santa Clara County Public Health Laboratory               | Chan-Zuckerberg Biohub                                                                                       | CZB Cliahub Consortium                                                                                                                                                                                                                                                                                                                                                                                                                                                               |
| EPI_ISL_850019, EPI_ISL_850020, EPI_ISL_850021, EPI_ISL_850022, EPI_ISL_850023, EPI_ISL_850024, EPI_ISL_850025, EPI_ISL_850026, EPI_ISL_850027, EPI_ISL_850028, EPI_ISL_850029, EPI_ISL_850030, EPI_ISL_850031, EPI_ISL_850032, EPI_ISL_850033, EPI_ISL_850034, EPI_ISL_850035, EPI_ISL_850036, EPI_ISL_850037, EPI_ISL_850038, EPI_ISL_850039, EPI_ISL_850040, EPI_ISL_850041, EPI_ISL_850042, EPI_ISL_850043, EPI_ISL_850044, EPI_ISL_850045, EPI_ISL_850046, EPI_ISL_850047, EPI_ISL_850048, EPI_ISL_850049, EPI_ISL_850050, EPI_ISL_850051, EPI_ISL_850052, EPI_ISL_850053, EPI_ISL_850054, EPI_ISL_850055, EPI_ISL_850056, EPI_ISL_850057, EPI_ISL_850058, EPI_ISL_850059, EPI_ISL_850060, EPI_ISL_850061, EPI_ISL_850062, EPI_ISL_850063, EPI_ISL_850064, EPI_ISL_850065, EPI_ISL_850066, EPI_ISL_850067, EPI_ISL_850068, EPI_ISL_850069, EPI_ISL_850070, EPI_ISL_850071, EPI_ISL_850072, EPI_ISL_850073, EPI_ISL_850074, EPI_ISL_850075, EPI_ISL_850076, EPI_ISL_850077, EPI_ISL_850078, EPI_ISL_850079, EPI_ISL_850080, EPI_ISL_850081, EPI_ISL_850082, EPI_ISL_850083, EPI_ISL_850084, EPI_ISL_850085, EPI_ISL_850086, EPI_ISL_850087, EPI_ISL_850088, EPI_ISL_850089, EPI_ISL_850090, EPI_ISL_850091, EPI_ISL_850092, EPI_ISL_850093, EPI_ISL_850094, EPI_ISL_850095, EPI_ISL_850096, EPI_ISL_850097, EPI_ISL_850098, EPI_ISL_850099, EPI_ISL_850100, EPI_ISL_850101, EPI_ISL_850102, EPI_ISL_850103, EPI_ISL_850104, EPI_ISL_850105, EPI_ISL_850106, EPI_ISL_850107, EPI_ISL_850108, EPI_ISL_850109, EPI_ISL_850110, EPI_ISL_850111, EPI_ISL_850112, EPI_ISL_850113, EPI_ISL_850114, EPI_ISL_850115, EPI_ISL_850116, EPI_ISL_850117, EPI_ISL_850118, EPI_ISL_850119, EPI_ISL_850120, EPI_ISL_850121, EPI_ISL_850122, EPI_ISL_850123, EPI_ISL_850124, EPI_ISL_850125, EPI_ISL_850126, EPI_ISL_850127, EPI_ISL_850128, EPI_ISL_850129, EPI_ISL_850130, EPI_ISL_850131, EPI_ISL_850132, EPI_ISL_850133, EPI_ISL_850134, EPI_ISL_850135, EPI_ISL_850136, EPI_ISL_850137, EPI_ISL_850138, EPI_ISL_850139, EPI_ISL_850140, EPI_ISL_850141, EPI_ISL_850142, EPI_ISL_850143, EPI_ISL_850144, EPI_ISL_850145, EPI_ISL_850146, EPI_ISL_850147, EPI_ISL_850148, EPI_ISL_850149, EPI_ISL_850150, EPI_ISL_850151, EPI_ISL_850152, EPI_ISL_850153, EPI_ISL_850154, EPI_ISL_850155, EPI_ISL_850156, EPI_ISL_850157, EPI_ISL_850158, EPI_ISL_850159, EPI_ISL_850160, EPI_ISL_850161, EPI_ISL_850162, EPI_ISL_850163, EPI_ISL_850164, EPI_ISL_850165, EPI_ISL_850166, EPI_ISL_850167, EPI_ISL_850168, EPI_ISL_850169, EPI_ISL_850170, EPI_ISL_850171, EPI_ISL_850172, EPI_ISL_850173, EPI_ISL_850174, EPI_ISL_850175, EPI_ISL_850176, EPI_ISL_850177, EPI_ISL_850178, EPI_ISL_850179 | Chan-Zuckerberg Biohub                                    | CZB Cliahub Consortium                                                                                       |                                                                                                                                                                                                                                                                                                                                                                                                                                                                                      |
| see above                                                                                                                                                                                                                                                                                                                                                                                                                                                                                                                                                                                                                                                                                                                                                                                                                                                                                                                                                                                                                                                                                                                                                                                                                                                                                                                                                                                                                                                                                                                                                                                                                                                                                                                                                                                                                                                                                                                                                                                                                                                                                                                                                                                                                                                                                                                                                                                                                                                                                                                                                                                                                                                                      | Renegade                                                  | Chan-Zuckerberg Biohub                                                                                       | CZB Cliahub Consortium                                                                                                                                                                                                                                                                                                                                                                                                                                                               |
| EPI_ISL_853417, EPI_ISL_853418, EPI_ISL_853419, EPI_ISL_853420, EPI_ISL_853421, EPI_ISL_853422, EPI_ISL_853423, EPI_ISL_853424, EPI_ISL_853425, EPI_ISL_853426, EPI_ISL_853427, EPI_ISL_853428, EPI_ISL_853429, EPI_ISL_853430, EPI_ISL_853431, EPI_ISL_853432, EPI_ISL_853433, EPI_ISL_853434, EPI_ISL_853435, EPI_ISL_853436, EPI_ISL_853437, EPI_ISL_853438, EPI_ISL_853439, EPI_ISL_853440, EPI_ISL_853441, EPI_ISL_853442, EPI_ISL_853443, EPI_ISL_853444, EPI_ISL_853445, EPI_ISL_853446, EPI_ISL_853447, EPI_ISL_853448, EPI_ISL_853449, EPI_ISL_853450, EPI_ISL_853451, EPI_ISL_853452, EPI_ISL_853453, EPI_ISL_853454, EPI_ISL_853455, EPI_ISL_853456, EPI_ISL_853457, EPI_ISL_853458, EPI_ISL_853459, EPI_ISL_853460, EPI_ISL_853461, EPI_ISL_853462, EPI_ISL_853463, EPI_ISL_853464, EPI_ISL_853465, EPI_ISL_853466, EPI_ISL_853467, EPI_ISL_853468, EPI_ISL_853469, EPI_ISL_853470, EPI_ISL_853471, EPI_ISL_853472, EPI_ISL_853473, EPI_ISL_853474, EPI_ISL_853475, EPI_ISL_853476, EPI_ISL_853477, EPI_ISL_853478, EPI_ISL_853479, EPI_ISL_853480, EPI_ISL_853481, EPI_ISL_853482, EPI_ISL_853483, EPI_ISL_853484, EPI_ISL_853485, EPI_ISL_853486, EPI_ISL_853487, EPI_ISL_853488, EPI_ISL_853489, EPI_ISL_853490, EPI_ISL_853491, EPI_ISL_853492, EPI_ISL_853493, EPI_ISL_853494, EPI_ISL_853495, EPI_ISL_853496, EPI_ISL_853497, EPI_ISL_853498, EPI_ISL_853499, EPI_ISL_853500, EPI_ISL_853501, EPI_ISL_853502, EPI_ISL_853503, EPI_ISL_853504, EPI_ISL_853505, EPI_ISL_853506, EPI_ISL_853507, EPI_ISL_853508, EPI_ISL_853509, EPI_ISL_853510, EPI_ISL_853511, EPI_ISL_853512, EPI_ISL_853513, EPI_ISL_853514, EPI_ISL_853515, EPI_ISL_853516, EPI_ISL_853517, EPI_ISL_853518, EPI_ISL_853519, EPI_ISL_853520, EPI_ISL_853521, EPI_ISL_853522, EPI_ISL_853523, EPI_ISL_853524, EPI_ISL_853525, EPI_ISL_853526, EPI_ISL_853527, EPI_ISL_853528, EPI_ISL_853529, EPI_ISL_853530, EPI_ISL_853531, EPI_ISL_853532, EPI_ISL_853533, EPI_ISL_853534, EPI_ISL_853535, EPI_ISL_853536, EPI_ISL_853537, EPI_ISL_853538, EPI_ISL_853539, EPI_ISL_853540, EPI_ISL_853541, EPI_ISL_853542, EPI_ISL_853543, EPI_ISL_853544, EPI_ISL_853545, EPI_ISL_853546, EPI_ISL_853547, EPI_ISL_853548, EPI_ISL_853549, EPI_ISL_853550, EPI_ISL_853551, EPI_ISL_853552, EPI_ISL_853553, EPI_ISL_853554, EPI_ISL_853555, EPI_ISL_853556, EPI_ISL_853557, EPI_ISL_853558, EPI_ISL_853559, EPI_ISL_853560, EPI_ISL_853561, EPI_ISL_853562, EPI_ISL_853563, EPI_ISL_853564, EPI_ISL_853565                                                                                                                                                                                                 | Chan-Zuckerberg Biohub                                    | CZB Cliahub Consortium                                                                                       |                                                                                                                                                                                                                                                                                                                                                                                                                                                                                      |
| see above                                                                                                                                                                                                                                                                                                                                                                                                                                                                                                                                                                                                                                                                                                                                                                                                                                                                                                                                                                                                                                                                                                                                                                                                                                                                                                                                                                                                                                                                                                                                                                                                                                                                                                                                                                                                                                                                                                                                                                                                                                                                                                                                                                                                                                                                                                                                                                                                                                                                                                                                                                                                                                                                      | Santa Clara County Public Health Laboratory               | Chan-Zuckerberg Biohub                                                                                       | CZB Cliahub Consortium                                                                                                                                                                                                                                                                                                                                                                                                                                                               |
| EPI_ISL_855016, EPI_ISL_855019, EPI_ISL_855023, EPI_ISL_855027, EPI_ISL_855030, EPI_ISL_855031, EPI_ISL_855033, EPI_ISL_855034, EPI_ISL_855037, EPI_ISL_855038, EPI_ISL_855039, EPI_ISL_855041, EPI_ISL_855046, EPI_ISL_855047, EPI_ISL_855049, EPI_ISL_855050, EPI_ISL_855052, EPI_ISL_855053, EPI_ISL_855054, EPI_ISL_855057, EPI_ISL_855059, EPI_ISL_855060, EPI_ISL_855061, EPI_ISL_855062, EPI_ISL_855063                                                                                                                                                                                                                                                                                                                                                                                                                                                                                                                                                                                                                                                                                                                                                                                                                                                                                                                                                                                                                                                                                                                                                                                                                                                                                                                                                                                                                                                                                                                                                                                                                                                                                                                                                                                                                                                                                                                                                                                                                                                                                                                                                                                                                                                                 | Quest Diagnostics                                         | Quest Diagnostics                                                                                            | Rosenthal,S.H., Gerasimova,A., Kagan,R.M., Anderson, B., Hua, M., Liu Y., Bernstein, L.E., Livingston, K.E., Perez, A., Shalhout, D.F., Shlyakhter, I.A., Owen, R., Tanpaiboon, P., Lacbawan, F.                                                                                                                                                                                                                                                                                     |
| EPI_ISL_855389, EPI_ISL_855390, EPI_ISL_855391, EPI_ISL_855392, EPI_ISL_855393, EPI_ISL_855394, EPI_ISL_855395, EPI_ISL_855396, EPI_ISL_855397, EPI_ISL_855398                                                                                                                                                                                                                                                                                                                                                                                                                                                                                                                                                                                                                                                                                                                                                                                                                                                                                                                                                                                                                                                                                                                                                                                                                                                                                                                                                                                                                                                                                                                                                                                                                                                                                                                                                                                                                                                                                                                                                                                                                                                                                                                                                                                                                                                                                                                                                                                                                                                                                                                 | California Department of Public Health                    | Chiu Laboratory, University of California, San Francisco                                                     | Charles Chiu, Xianding (Wayne) Deng, Candace Wang, Brian Bushnell, Scot Federman, Jill Hacker, Debra Wadford                                                                                                                                                                                                                                                                                                                                                                         |
| EPI_ISL_855399, EPI_ISL_855400, EPI_ISL_855401                                                                                                                                                                                                                                                                                                                                                                                                                                                                                                                                                                                                                                                                                                                                                                                                                                                                                                                                                                                                                                                                                                                                                                                                                                                                                                                                                                                                                                                                                                                                                                                                                                                                                                                                                                                                                                                                                                                                                                                                                                                                                                                                                                                                                                                                                                                                                                                                                                                                                                                                                                                                                                 | Chiu Laboratory, University of California, San Francisco  | Chiu Laboratory, University of California, San Francisco                                                     | Charles Chiu, Xianding (Wayne) Deng, Candace Wang, Brian Bushnell, Scot Federman, Jill Hacker, Debra Wadford                                                                                                                                                                                                                                                                                                                                                                         |
| EPI_ISL_861698, EPI_ISL_861699                                                                                                                                                                                                                                                                                                                                                                                                                                                                                                                                                                                                                                                                                                                                                                                                                                                                                                                                                                                                                                                                                                                                                                                                                                                                                                                                                                                                                                                                                                                                                                                                                                                                                                                                                                                                                                                                                                                                                                                                                                                                                                                                                                                                                                                                                                                                                                                                                                                                                                                                                                                                                                                 | Los Angeles County PHL                                    | Los Angeles County PHL                                                                                       | P. Hemarajata et al.                                                                                                                                                                                                                                                                                                                                                                                                                                                                 |
| EPI_ISL_876827, EPI_ISL_876828, EPI_ISL_876882, EPI_ISL_876887, EPI_ISL_876888, EPI_ISL_876894, EPI_ISL_876905, EPI_ISL_876910, EPI_ISL_876913, EPI_ISL_876926, EPI_ISL_876930, EPI_ISL_876936, EPI_ISL_876950, EPI_ISL_877186, EPI_ISL_877188                                                                                                                                                                                                                                                                                                                                                                                                                                                                                                                                                                                                                                                                                                                                                                                                                                                                                                                                                                                                                                                                                                                                                                                                                                                                                                                                                                                                                                                                                                                                                                                                                                                                                                                                                                                                                                                                                                                                                                                                                                                                                                                                                                                                                                                                                                                                                                                                                                 | Quest Diagnostics                                         | Quest Diagnostics                                                                                            | Rosenthal,S.H., Gerasimova,A., Kagan,R.M., Anderson, B., Hua, M., Liu Y., Bernstein, L.E., Livingston, K.E., Perez, A., Shalhout, D.F., Shlyakhter, I.A., Owen, R., Tanpaiboon, P., Lacbawan, F.                                                                                                                                                                                                                                                                                     |
| EPI_ISL_878152, EPI_ISL_878155, EPI_ISL_878157, EPI_ISL_878159, EPI_ISL_878162, EPI_ISL_878165, EPI_ISL_878167, EPI_ISL_878170, EPI_ISL_878172, EPI_ISL_878175, EPI_ISL_878178, EPI_ISL_878180, EPI_ISL_878183, EPI_ISL_878186, EPI_ISL_878189, EPI_ISL_878191, EPI_ISL_878194, EPI_ISL_878197, EPI_ISL_878199, EPI_ISL_878202, EPI_ISL_878205, EPI_ISL_878207, EPI_ISL_878209, EPI_ISL_878215, EPI_ISL_878217, EPI_ISL_878221, EPI_ISL_878223, EPI_ISL_878229, EPI_ISL_878232, EPI_ISL_878234, EPI_ISL_878237, EPI_ISL_878242, EPI_ISL_878248, EPI_ISL_878250, EPI_ISL_878253, EPI_ISL_878256, EPI_ISL_878258, EPI_ISL_878260, EPI_ISL_878263, EPI_ISL_878266, EPI_ISL_878268, EPI_ISL_878271, EPI_ISL_878274, EPI_ISL_878276, EPI_ISL_878279, EPI_ISL_878281, EPI_ISL_878284, EPI_ISL_878287, EPI_ISL_878292, EPI_ISL_878295, EPI_ISL_878298, EPI_ISL_878303, EPI_ISL_878305, EPI_ISL_878308, EPI_ISL_878311, EPI_ISL_878314, EPI_ISL_878316, EPI_ISL_878319, EPI_ISL_878321, EPI_ISL_878325, EPI_ISL_878327, EPI_ISL_878330, EPI_ISL_878333, EPI_ISL_878336, EPI_ISL_878338, EPI_ISL_878341, EPI_ISL_878343, EPI_ISL_878344, EPI_ISL_878345, EPI_ISL_878346, EPI_ISL_878347, EPI_ISL_878348, EPI_ISL_878349, EPI_ISL_878350, EPI_ISL_878351, EPI_ISL_878352, EPI_ISL_878353, EPI_ISL_878354, EPI_ISL_878355, EPI_ISL_878356, EPI_ISL_878357, EPI_ISL_878358, EPI_ISL_878359, EPI_ISL_878360, EPI_ISL_878361, EPI_ISL_878362, EPI_ISL_878363, EPI_ISL_878364, EPI_ISL_878365, EPI_ISL_878366, EPI_ISL_878368, EPI_ISL_878369, EPI_ISL_878370, EPI_ISL_878371, EPI_ISL_878372, EPI_ISL_878373, EPI_ISL_878374, EPI_ISL_878376, EPI_ISL_878377, EPI_ISL_878378, EPI_ISL_878379, EPI_ISL_878380, EPI_ISL_878381, EPI_ISL_878382, EPI_ISL_878383, EPI_ISL_878384, EPI_ISL_878385, EPI_ISL_878386, EPI_ISL_878387, EPI_ISL_878388, EPI_ISL_878389, EPI_ISL_878390, EPI_ISL_878391, EPI_ISL_878392, EPI_ISL_878393, EPI_ISL_878394, EPI_ISL_878395, EPI_ISL_878396, EPI_ISL_878397, EPI_ISL_878398, EPI_ISL_878399, EPI_ISL_878400, EPI_ISL_878401, EPI_ISL_878402, EPI_ISL_878403, EPI_ISL_878404, EPI_ISL_878406, EPI_ISL_878407, EPI_ISL_878411, EPI_ISL_878413, EPI_ISL_878414, EPI_ISL_878418, EPI_ISL_878419, EPI_ISL_878421, EPI_ISL_878423, EPI_ISL_878426, EPI_ISL_878429, EPI_ISL_878431, EPI_ISL_878434, EPI_ISL_878584, EPI_ISL_878587, EPI_ISL_878589, EPI_ISL_878592, EPI_ISL_878593, EPI_ISL_878597, EPI_ISL_878600, EPI_ISL_878603, EPI_ISL_878605, EPI_ISL_878608, EPI_ISL_878611, EPI_ISL_878613, EPI_ISL_878616, EPI_ISL_878619, EPI_ISL_878624, EPI_ISL_878629, EPI_ISL_878632, EPI_ISL_878635                                                                 | Andersen lab at Scripps Research                          | SEARCH Alliance San Diego with Tracy Basler, Jovan Shephard, Brett Austin                                    |                                                                                                                                                                                                                                                                                                                                                                                                                                                                                      |
| EPI_ISL_878637, EPI_ISL_878640, EPI_ISL_878643, EPI_ISL_878645, EPI_ISL_878648, EPI_ISL_878651, EPI_ISL_878653, EPI_ISL_878656, EPI_ISL_878658, EPI_ISL_878661, EPI_ISL_878664, EPI_ISL_878666, EPI_ISL_878669, EPI_ISL_878671, EPI_ISL_878674, EPI_ISL_878677, EPI_ISL_878679, EPI_ISL_878682, EPI_ISL_878684, EPI_ISL_878687, EPI_ISL_878690, EPI_ISL_878693, EPI_ISL_878697, EPI_ISL_878700, EPI_ISL_878702, EPI_ISL_878705, EPI_ISL_878707, EPI_ISL_878710, EPI_ISL_878713, EPI_ISL_878716, EPI_ISL_878719, EPI_ISL_878721, EPI_ISL_878724, EPI_ISL_878726, EPI_ISL_878729, EPI_ISL_878732, EPI_ISL_878736, EPI_ISL_878739, EPI_ISL_878742, EPI_ISL_878747, EPI_ISL_878755, EPI_ISL_878757, EPI_ISL_878760, EPI_ISL_878763, EPI_ISL_878765, EPI_ISL_878768, EPI_ISL_878771, EPI_ISL_878773, EPI_ISL_878776, EPI_ISL_878779, EPI_ISL_878781, EPI_ISL_878786, EPI_ISL_878789, EPI_ISL_878791, EPI_ISL_878797                                                                                                                                                                                                                                                                                                                                                                                                                                                                                                                                                                                                                                                                                                                                                                                                                                                                                                                                                                                                                                                                                                                                                                                                                                                                                                                                                                                                                                                                                                                                                                                                                                                                                                                                                                 | Rady's Childrens Hospital                                 | Andersen lab at Scripps Research                                                                             | SEARCH Alliance San Diego with Nanda Radamchar, David Dimmock, Linda Luo, Christina Clarke, Kathryn Bouic, Teresa Mueller, Denise Malicki                                                                                                                                                                                                                                                                                                                                            |
| EPI_ISL_879924, EPI_ISL_879926, EPI_ISL_879929, EPI_ISL_879932, EPI_ISL_879934, EPI_ISL_879937, EPI_ISL_879939, EPI_ISL_879942, EPI_ISL_879945, EPI_ISL_879947, EPI_ISL_879953, EPI_ISL_879956, EPI_ISL_879959, EPI_ISL_879961, EPI_ISL_879964, EPI_ISL_879967, EPI_ISL_879969, EPI_ISL_879972,                                                                                                                                                                                                                                                                                                                                                                                                                                                                                                                                                                                                                                                                                                                                                                                                                                                                                                                                                                                                                                                                                                                                                                                                                                                                                                                                                                                                                                                                                                                                                                                                                                                                                                                                                                                                                                                                                                                                                                                                                                                                                                                                                                                                                                                                                                                                                                                |                                                           |                                                                                                              |                                                                                                                                                                                                                                                                                                                                                                                                                                                                                      |



|                                                                                                                                                                                                                                                                                                                                                                                                                                                                                                                                                                                                                                                                                                                                                                                                                                                                                                                                                                                                                                                                                                                                                                                                                                                                                                                                                                                                                                                                                                                                                                                                                                                                                                                                                                                                                                                                                                                                                                                                                                                                                                                                                                                                                                                                                                                                                                                                                                |                                                           |                                                                                                                            |                                                                                                                                                                                                                                                                                                                                                                                                                                                                                                                                                                                                                                                                                                                                                                                                                                                     |
|--------------------------------------------------------------------------------------------------------------------------------------------------------------------------------------------------------------------------------------------------------------------------------------------------------------------------------------------------------------------------------------------------------------------------------------------------------------------------------------------------------------------------------------------------------------------------------------------------------------------------------------------------------------------------------------------------------------------------------------------------------------------------------------------------------------------------------------------------------------------------------------------------------------------------------------------------------------------------------------------------------------------------------------------------------------------------------------------------------------------------------------------------------------------------------------------------------------------------------------------------------------------------------------------------------------------------------------------------------------------------------------------------------------------------------------------------------------------------------------------------------------------------------------------------------------------------------------------------------------------------------------------------------------------------------------------------------------------------------------------------------------------------------------------------------------------------------------------------------------------------------------------------------------------------------------------------------------------------------------------------------------------------------------------------------------------------------------------------------------------------------------------------------------------------------------------------------------------------------------------------------------------------------------------------------------------------------------------------------------------------------------------------------------------------------|-----------------------------------------------------------|----------------------------------------------------------------------------------------------------------------------------|-----------------------------------------------------------------------------------------------------------------------------------------------------------------------------------------------------------------------------------------------------------------------------------------------------------------------------------------------------------------------------------------------------------------------------------------------------------------------------------------------------------------------------------------------------------------------------------------------------------------------------------------------------------------------------------------------------------------------------------------------------------------------------------------------------------------------------------------------------|
| EPI_ISL_879975, EPI_ISL_879980, EPI_ISL_879982, EPI_ISL_879985, EPI_ISL_879987, EPI_ISL_879990, EPI_ISL_879993, EPI_ISL_879995, EPI_ISL_879998, EPI_ISL_880000, EPI_ISL_880003, EPI_ISL_880006, EPI_ISL_880009, EPI_ISL_880011, EPI_ISL_880014, EPI_ISL_880017, EPI_ISL_880019, EPI_ISL_880022, EPI_ISL_880024, EPI_ISL_880027, EPI_ISL_880029, EPI_ISL_880032, EPI_ISL_880034                                                                                                                                                                                                                                                                                                                                                                                                                                                                                                                                                                                                                                                                                                                                                                                                                                                                                                                                                                                                                                                                                                                                                                                                                                                                                                                                                                                                                                                                                                                                                                                                                                                                                                                                                                                                                                                                                                                                                                                                                                                 |                                                           |                                                                                                                            |                                                                                                                                                                                                                                                                                                                                                                                                                                                                                                                                                                                                                                                                                                                                                                                                                                                     |
| see above                                                                                                                                                                                                                                                                                                                                                                                                                                                                                                                                                                                                                                                                                                                                                                                                                                                                                                                                                                                                                                                                                                                                                                                                                                                                                                                                                                                                                                                                                                                                                                                                                                                                                                                                                                                                                                                                                                                                                                                                                                                                                                                                                                                                                                                                                                                                                                                                                      | San Diego County Public Health Laboratory                 | Andersen lab at Scripps Research                                                                                           | SEARCH Alliance San Diego with Tracy Basler, Jovan Shephard, Brett Austin                                                                                                                                                                                                                                                                                                                                                                                                                                                                                                                                                                                                                                                                                                                                                                           |
| EPI_ISL_880172, EPI_ISL_880173, EPI_ISL_880174, EPI_ISL_880175, EPI_ISL_880180, EPI_ISL_880181, EPI_ISL_880184, EPI_ISL_880185, EPI_ISL_880186, EPI_ISL_880187, EPI_ISL_880188, EPI_ISL_880189, EPI_ISL_880190, EPI_ISL_880191, EPI_ISL_880193, EPI_ISL_880194, EPI_ISL_880195, EPI_ISL_880196, EPI_ISL_880197, EPI_ISL_880198, EPI_ISL_880199, EPI_ISL_880200                                                                                                                                                                                                                                                                                                                                                                                                                                                                                                                                                                                                                                                                                                                                                                                                                                                                                                                                                                                                                                                                                                                                                                                                                                                                                                                                                                                                                                                                                                                                                                                                                                                                                                                                                                                                                                                                                                                                                                                                                                                                 |                                                           |                                                                                                                            |                                                                                                                                                                                                                                                                                                                                                                                                                                                                                                                                                                                                                                                                                                                                                                                                                                                     |
| see above                                                                                                                                                                                                                                                                                                                                                                                                                                                                                                                                                                                                                                                                                                                                                                                                                                                                                                                                                                                                                                                                                                                                                                                                                                                                                                                                                                                                                                                                                                                                                                                                                                                                                                                                                                                                                                                                                                                                                                                                                                                                                                                                                                                                                                                                                                                                                                                                                      | Rady's Childrens Hospital                                 | Andersen lab at Scripps Research                                                                                           | SEARCH Alliance San Diego with Nanda Radamchar, David Dimmock, Linda Luo, Christina Clarke, Kathryn Bouic, Teresa Mueller, Denise Malicki                                                                                                                                                                                                                                                                                                                                                                                                                                                                                                                                                                                                                                                                                                           |
| EPI_ISL_884308, EPI_ISL_884309, EPI_ISL_884310, EPI_ISL_884311, EPI_ISL_884312, EPI_ISL_884313, EPI_ISL_884314, EPI_ISL_884315                                                                                                                                                                                                                                                                                                                                                                                                                                                                                                                                                                                                                                                                                                                                                                                                                                                                                                                                                                                                                                                                                                                                                                                                                                                                                                                                                                                                                                                                                                                                                                                                                                                                                                                                                                                                                                                                                                                                                                                                                                                                                                                                                                                                                                                                                                 | Infectious Diseases, Quest Diagnostics                    | Infectious Diseases, Quest Diagnostics                                                                                     | Rosenthal,S.H., Gerasimova,A., Kagan,R.M., Anderson,B., Bernstein,L.E., Livingston,K.E., Hua,M., Liu,Y., Shalhout,D.F., Owen,R., Lacbawan,F.                                                                                                                                                                                                                                                                                                                                                                                                                                                                                                                                                                                                                                                                                                        |
| EPI_ISL_884866, EPI_ISL_884867, EPI_ISL_884868, EPI_ISL_884869, EPI_ISL_884870                                                                                                                                                                                                                                                                                                                                                                                                                                                                                                                                                                                                                                                                                                                                                                                                                                                                                                                                                                                                                                                                                                                                                                                                                                                                                                                                                                                                                                                                                                                                                                                                                                                                                                                                                                                                                                                                                                                                                                                                                                                                                                                                                                                                                                                                                                                                                 | CA DPH Viral and Rickettsial Disease Laboratory           | Chan-Zuckerberg Biohub                                                                                                     | CZB Cliahub Consortium                                                                                                                                                                                                                                                                                                                                                                                                                                                                                                                                                                                                                                                                                                                                                                                                                              |
| EPI_ISL_884871, EPI_ISL_884872, EPI_ISL_884873, EPI_ISL_884874, EPI_ISL_884875, EPI_ISL_884876, EPI_ISL_884877, EPI_ISL_884878, EPI_ISL_884879, EPI_ISL_884880, EPI_ISL_884881, EPI_ISL_884882, EPI_ISL_884883, EPI_ISL_884884, EPI_ISL_884885, EPI_ISL_884886, EPI_ISL_884887, EPI_ISL_884888, EPI_ISL_884889, EPI_ISL_884890, EPI_ISL_884891, EPI_ISL_884892, EPI_ISL_884893, EPI_ISL_884894, EPI_ISL_884895, EPI_ISL_884896, EPI_ISL_884897, EPI_ISL_884898, EPI_ISL_884899, EPI_ISL_884900, EPI_ISL_884901, EPI_ISL_884902, EPI_ISL_884903, EPI_ISL_884904, EPI_ISL_884905, EPI_ISL_884906, EPI_ISL_884907, EPI_ISL_884908, EPI_ISL_884909, EPI_ISL_884910, EPI_ISL_884911, EPI_ISL_884912, EPI_ISL_884913, EPI_ISL_884914, EPI_ISL_884915, EPI_ISL_884916, EPI_ISL_884917, EPI_ISL_884918, EPI_ISL_884919, EPI_ISL_884920, EPI_ISL_884921, EPI_ISL_884922, EPI_ISL_884923, EPI_ISL_884924, EPI_ISL_884925, EPI_ISL_884926, EPI_ISL_884927, EPI_ISL_884928, EPI_ISL_884929, EPI_ISL_884930, EPI_ISL_884931, EPI_ISL_884932, EPI_ISL_884933, EPI_ISL_884934, EPI_ISL_884935, EPI_ISL_884936, EPI_ISL_884937, EPI_ISL_884938, EPI_ISL_884939, EPI_ISL_884940, EPI_ISL_884941, EPI_ISL_884942, EPI_ISL_884943, EPI_ISL_884944, EPI_ISL_884945, EPI_ISL_884946, EPI_ISL_884947, EPI_ISL_884948, EPI_ISL_884949, EPI_ISL_884950, EPI_ISL_884951, EPI_ISL_884952, EPI_ISL_884953, EPI_ISL_884954, EPI_ISL_884955, EPI_ISL_884956, EPI_ISL_884957, EPI_ISL_884958, EPI_ISL_884959, EPI_ISL_884960, EPI_ISL_884961, EPI_ISL_884962, EPI_ISL_884963, EPI_ISL_884964, EPI_ISL_884965, EPI_ISL_884966, EPI_ISL_884967, EPI_ISL_884968, EPI_ISL_884969, EPI_ISL_884970, EPI_ISL_884971, EPI_ISL_884972, EPI_ISL_884973, EPI_ISL_884974, EPI_ISL_884975, EPI_ISL_884976, EPI_ISL_884977, EPI_ISL_884978, EPI_ISL_884979, EPI_ISL_884980, EPI_ISL_884981, EPI_ISL_884982, EPI_ISL_884983, EPI_ISL_884984, EPI_ISL_884985, EPI_ISL_884986, EPI_ISL_884987, EPI_ISL_884988, EPI_ISL_884989, EPI_ISL_884990, EPI_ISL_884991, EPI_ISL_884992, EPI_ISL_884993, EPI_ISL_884994, EPI_ISL_884995, EPI_ISL_884996, EPI_ISL_884997, EPI_ISL_884998, EPI_ISL_884999, EPI_ISL_885000, EPI_ISL_885001, EPI_ISL_885002, EPI_ISL_885003, EPI_ISL_885004, EPI_ISL_885005, EPI_ISL_885006, EPI_ISL_885007, EPI_ISL_885008, EPI_ISL_885009, EPI_ISL_885010, EPI_ISL_885011, EPI_ISL_885012, EPI_ISL_885013, EPI_ISL_885014, EPI_ISL_885018, EPI_ISL_885051 |                                                           |                                                                                                                            |                                                                                                                                                                                                                                                                                                                                                                                                                                                                                                                                                                                                                                                                                                                                                                                                                                                     |
| see above                                                                                                                                                                                                                                                                                                                                                                                                                                                                                                                                                                                                                                                                                                                                                                                                                                                                                                                                                                                                                                                                                                                                                                                                                                                                                                                                                                                                                                                                                                                                                                                                                                                                                                                                                                                                                                                                                                                                                                                                                                                                                                                                                                                                                                                                                                                                                                                                                      | Santa Clara County Public Health Laboratory               | Chan-Zuckerberg Biohub                                                                                                     | CZB Cliahub Consortium                                                                                                                                                                                                                                                                                                                                                                                                                                                                                                                                                                                                                                                                                                                                                                                                                              |
| EPI_ISL_885052, EPI_ISL_885053, EPI_ISL_885054, EPI_ISL_885055, EPI_ISL_885056, EPI_ISL_885057, EPI_ISL_885058, EPI_ISL_885059, EPI_ISL_885060, EPI_ISL_885061, EPI_ISL_885062, EPI_ISL_885063, EPI_ISL_885064, EPI_ISL_885065, EPI_ISL_885066, EPI_ISL_885067, EPI_ISL_885068, EPI_ISL_885069, EPI_ISL_885070, EPI_ISL_885071, EPI_ISL_885072, EPI_ISL_885073, EPI_ISL_885074, EPI_ISL_885075, EPI_ISL_885076, EPI_ISL_885077, EPI_ISL_885078, EPI_ISL_885079, EPI_ISL_885080, EPI_ISL_885081, EPI_ISL_885082, EPI_ISL_885083, EPI_ISL_885084, EPI_ISL_885085, EPI_ISL_885086, EPI_ISL_885087, EPI_ISL_885088, EPI_ISL_885089, EPI_ISL_885090, EPI_ISL_885091, EPI_ISL_885092, EPI_ISL_885093, EPI_ISL_885094, EPI_ISL_885095, EPI_ISL_885096, EPI_ISL_885097, EPI_ISL_885098, EPI_ISL_885099, EPI_ISL_885100, EPI_ISL_885101, EPI_ISL_885102, EPI_ISL_885103, EPI_ISL_885104, EPI_ISL_885105, EPI_ISL_885106, EPI_ISL_885107, EPI_ISL_885108, EPI_ISL_885109, EPI_ISL_885110, EPI_ISL_885111, EPI_ISL_885112, EPI_ISL_885113, EPI_ISL_885114, EPI_ISL_885115, EPI_ISL_885116, EPI_ISL_885117, EPI_ISL_885118, EPI_ISL_885119, EPI_ISL_885120, EPI_ISL_885121, EPI_ISL_885122, EPI_ISL_885123, EPI_ISL_885124, EPI_ISL_885125, EPI_ISL_885126, EPI_ISL_885127                                                                                                                                                                                                                                                                                                                                                                                                                                                                                                                                                                                                                                                                                                                                                                                                                                                                                                                                                                                                                                                                                                                                                                 |                                                           |                                                                                                                            |                                                                                                                                                                                                                                                                                                                                                                                                                                                                                                                                                                                                                                                                                                                                                                                                                                                     |
| see above                                                                                                                                                                                                                                                                                                                                                                                                                                                                                                                                                                                                                                                                                                                                                                                                                                                                                                                                                                                                                                                                                                                                                                                                                                                                                                                                                                                                                                                                                                                                                                                                                                                                                                                                                                                                                                                                                                                                                                                                                                                                                                                                                                                                                                                                                                                                                                                                                      | Orange County Public Health Lab                           | Chan-Zuckerberg Biohub                                                                                                     | CZB Cliahub Consortium                                                                                                                                                                                                                                                                                                                                                                                                                                                                                                                                                                                                                                                                                                                                                                                                                              |
| EPI_ISL_885128, EPI_ISL_885129, EPI_ISL_885130, EPI_ISL_885131, EPI_ISL_885132, EPI_ISL_885133, EPI_ISL_885134, EPI_ISL_885135, EPI_ISL_885136, EPI_ISL_885137, EPI_ISL_885138                                                                                                                                                                                                                                                                                                                                                                                                                                                                                                                                                                                                                                                                                                                                                                                                                                                                                                                                                                                                                                                                                                                                                                                                                                                                                                                                                                                                                                                                                                                                                                                                                                                                                                                                                                                                                                                                                                                                                                                                                                                                                                                                                                                                                                                 |                                                           |                                                                                                                            |                                                                                                                                                                                                                                                                                                                                                                                                                                                                                                                                                                                                                                                                                                                                                                                                                                                     |
| see above                                                                                                                                                                                                                                                                                                                                                                                                                                                                                                                                                                                                                                                                                                                                                                                                                                                                                                                                                                                                                                                                                                                                                                                                                                                                                                                                                                                                                                                                                                                                                                                                                                                                                                                                                                                                                                                                                                                                                                                                                                                                                                                                                                                                                                                                                                                                                                                                                      | California Institute of Technology                        | Chan-Zuckerberg Biohub                                                                                                     | CZB Cliahub Consortium                                                                                                                                                                                                                                                                                                                                                                                                                                                                                                                                                                                                                                                                                                                                                                                                                              |
| EPI_ISL_887678, EPI_ISL_887696, EPI_ISL_887698, EPI_ISL_887762, EPI_ISL_887766, EPI_ISL_887779, EPI_ISL_887831, EPI_ISL_887859, EPI_ISL_887890, EPI_ISL_887891, EPI_ISL_887901, EPI_ISL_887903, EPI_ISL_887905, EPI_ISL_887953, EPI_ISL_887960, EPI_ISL_887971, EPI_ISL_887994, EPI_ISL_888015, EPI_ISL_888018, EPI_ISL_888019, EPI_ISL_888024, EPI_ISL_888030, EPI_ISL_888057, EPI_ISL_888066, EPI_ISL_888116, EPI_ISL_888117, EPI_ISL_888122, EPI_ISL_888139, EPI_ISL_888151, EPI_ISL_888163, EPI_ISL_888199, EPI_ISL_888221, EPI_ISL_888225, EPI_ISL_888241, EPI_ISL_888272, EPI_ISL_888274, EPI_ISL_888280, EPI_ISL_888325, EPI_ISL_888330, EPI_ISL_888334, EPI_ISL_888373, EPI_ISL_888382, EPI_ISL_888454, EPI_ISL_888486, EPI_ISL_888547, EPI_ISL_888567, EPI_ISL_888582                                                                                                                                                                                                                                                                                                                                                                                                                                                                                                                                                                                                                                                                                                                                                                                                                                                                                                                                                                                                                                                                                                                                                                                                                                                                                                                                                                                                                                                                                                                                                                                                                                                 |                                                           |                                                                                                                            |                                                                                                                                                                                                                                                                                                                                                                                                                                                                                                                                                                                                                                                                                                                                                                                                                                                     |
| see above                                                                                                                                                                                                                                                                                                                                                                                                                                                                                                                                                                                                                                                                                                                                                                                                                                                                                                                                                                                                                                                                                                                                                                                                                                                                                                                                                                                                                                                                                                                                                                                                                                                                                                                                                                                                                                                                                                                                                                                                                                                                                                                                                                                                                                                                                                                                                                                                                      | Labcorp                                                   | Genomics and Discovery, Respiratory Viruses Branch, Division of Viral Diseases, Centers for Disease Control and Prevention | Peter W. Cook,Dhwani Batra,Ben L. Rambo-Martin,Summer Galloway,Brian Krueger,Minoo Agarwal,Eyad Almasri,Debbie Boles,Ayla Burns,Nuthawin Charoensri,Oren Cohen,Susan Countryman,Mary Ann Cristobal,Bobbi Croy,Suzanne Dale,Hrushikesh Deshmukh,Amanda Douglas,Vincent Drouillon,Marcia Eisenberg,Howard Engler,Rama Ghatti,Prashant Gupta,Susan Hicks,Jake Humphrey,Lax Iyer,Manoj Jain,Mohan Kolli,Tim Kuphal,Stanley Letovsky,Michael Levandoski,Craig Lukasik,Jonathan Meltzer,Brian Norvell,Mindy Nye,Scott Parker,Christos Petropoulos,John Pruitt,Steven Ragan,Scott Ryan,Mike Sapeta,Jana Schroth,Suresh Babu Selvaraju,Goran Stevovic,Amanda Suchanek,Andrea Throop,Lyndon Tilson,Thomas Urban,Joe Voshell,Kimberly Wagner,Jonathan Williams,Mary Williamson,Qian Zeng,Tricia Zwiefelhofer,Clinton R. Paden,Suxiang Tong,Duncan MacCannell, |
| EPI_ISL_903367, EPI_ISL_903368, EPI_ISL_903369, EPI_ISL_903370                                                                                                                                                                                                                                                                                                                                                                                                                                                                                                                                                                                                                                                                                                                                                                                                                                                                                                                                                                                                                                                                                                                                                                                                                                                                                                                                                                                                                                                                                                                                                                                                                                                                                                                                                                                                                                                                                                                                                                                                                                                                                                                                                                                                                                                                                                                                                                 | Los Angeles County PHL                                    | Los Angeles County PHL                                                                                                     | P. Hemarajata et al.                                                                                                                                                                                                                                                                                                                                                                                                                                                                                                                                                                                                                                                                                                                                                                                                                                |
| EPI_ISL_912187, EPI_ISL_912188, EPI_ISL_912189, EPI_ISL_912190, EPI_ISL_912191, EPI_ISL_912192, EPI_ISL_912193, EPI_ISL_912194                                                                                                                                                                                                                                                                                                                                                                                                                                                                                                                                                                                                                                                                                                                                                                                                                                                                                                                                                                                                                                                                                                                                                                                                                                                                                                                                                                                                                                                                                                                                                                                                                                                                                                                                                                                                                                                                                                                                                                                                                                                                                                                                                                                                                                                                                                 | California Institute of Technology                        | Chan-Zuckerberg Biohub                                                                                                     | CZB Cliahub Consortium                                                                                                                                                                                                                                                                                                                                                                                                                                                                                                                                                                                                                                                                                                                                                                                                                              |
| EPI_ISL_914646                                                                                                                                                                                                                                                                                                                                                                                                                                                                                                                                                                                                                                                                                                                                                                                                                                                                                                                                                                                                                                                                                                                                                                                                                                                                                                                                                                                                                                                                                                                                                                                                                                                                                                                                                                                                                                                                                                                                                                                                                                                                                                                                                                                                                                                                                                                                                                                                                 | Santa Clara County Public Health Laboratory               | Santa Clara County Public Health Laboratory                                                                                | Santa Clara County Public Health Department                                                                                                                                                                                                                                                                                                                                                                                                                                                                                                                                                                                                                                                                                                                                                                                                         |
| EPI_ISL_915438                                                                                                                                                                                                                                                                                                                                                                                                                                                                                                                                                                                                                                                                                                                                                                                                                                                                                                                                                                                                                                                                                                                                                                                                                                                                                                                                                                                                                                                                                                                                                                                                                                                                                                                                                                                                                                                                                                                                                                                                                                                                                                                                                                                                                                                                                                                                                                                                                 | Los Angeles County PHL                                    | Los Angeles County PHL                                                                                                     | P. Hemarajata et al.                                                                                                                                                                                                                                                                                                                                                                                                                                                                                                                                                                                                                                                                                                                                                                                                                                |
| EPI_ISL_918178, EPI_ISL_918184, EPI_ISL_918186, EPI_ISL_918193, EPI_ISL_918197, EPI_ISL_918202, EPI_ISL_918205, EPI_ISL_918206, EPI_ISL_918207, EPI_ISL_918208, EPI_ISL_918209, EPI_ISL_918210, EPI_ISL_918211, EPI_ISL_918212, EPI_ISL_918213, EPI_ISL_918214, EPI_ISL_918215, EPI_ISL_918216, EPI_ISL_918217, EPI_ISL_918218, EPI_ISL_918219, EPI_ISL_918220, EPI_ISL_918221, EPI_ISL_918222, EPI_ISL_918223, EPI_ISL_918224, EPI_ISL_918225, EPI_ISL_918228, EPI_ISL_918229, EPI_ISL_918230, EPI_ISL_918231, EPI_ISL_918232, EPI_ISL_918233, EPI_ISL_918239, EPI_ISL_918240, EPI_ISL_918241, EPI_ISL_918242, EPI_ISL_918244, EPI_ISL_918248, EPI_ISL_918250, EPI_ISL_918261                                                                                                                                                                                                                                                                                                                                                                                                                                                                                                                                                                                                                                                                                                                                                                                                                                                                                                                                                                                                                                                                                                                                                                                                                                                                                                                                                                                                                                                                                                                                                                                                                                                                                                                                                 |                                                           |                                                                                                                            |                                                                                                                                                                                                                                                                                                                                                                                                                                                                                                                                                                                                                                                                                                                                                                                                                                                     |
| see above                                                                                                                                                                                                                                                                                                                                                                                                                                                                                                                                                                                                                                                                                                                                                                                                                                                                                                                                                                                                                                                                                                                                                                                                                                                                                                                                                                                                                                                                                                                                                                                                                                                                                                                                                                                                                                                                                                                                                                                                                                                                                                                                                                                                                                                                                                                                                                                                                      | Innovative Genomics Institute, UC Berkeley                | Innovative Genomics Institute, UC Berkeley                                                                                 | Stacia Wyman, Haridha Shivram, Phil Frankino, Liana Lareau, Shana McDevitt, Justin Choi                                                                                                                                                                                                                                                                                                                                                                                                                                                                                                                                                                                                                                                                                                                                                             |
| EPI_ISL_937027, EPI_ISL_937028, EPI_ISL_937029, EPI_ISL_937030, EPI_ISL_937031, EPI_ISL_937032, EPI_ISL_937033, EPI_ISL_937034                                                                                                                                                                                                                                                                                                                                                                                                                                                                                                                                                                                                                                                                                                                                                                                                                                                                                                                                                                                                                                                                                                                                                                                                                                                                                                                                                                                                                                                                                                                                                                                                                                                                                                                                                                                                                                                                                                                                                                                                                                                                                                                                                                                                                                                                                                 | Quest Diagnostics                                         | Quest Diagnostics                                                                                                          | Rosenthal,S.H., Gerasimova,A., Kagan,R.M., Anderson, B., Livingston, K.E., Hua, M., Liu Y., Shalhout, D.F., Owen, R., Lacbawan, F.                                                                                                                                                                                                                                                                                                                                                                                                                                                                                                                                                                                                                                                                                                                  |
| EPI_ISL_939619, EPI_ISL_939620, EPI_ISL_939621, EPI_ISL_939622, EPI_ISL_939623, EPI_ISL_939624, EPI_ISL_939625                                                                                                                                                                                                                                                                                                                                                                                                                                                                                                                                                                                                                                                                                                                                                                                                                                                                                                                                                                                                                                                                                                                                                                                                                                                                                                                                                                                                                                                                                                                                                                                                                                                                                                                                                                                                                                                                                                                                                                                                                                                                                                                                                                                                                                                                                                                 | USC Clinical Lab                                          | Los Angeles County PHL                                                                                                     | P. Hemarajata et al.                                                                                                                                                                                                                                                                                                                                                                                                                                                                                                                                                                                                                                                                                                                                                                                                                                |
| EPI_ISL_955126, EPI_ISL_955128                                                                                                                                                                                                                                                                                                                                                                                                                                                                                                                                                                                                                                                                                                                                                                                                                                                                                                                                                                                                                                                                                                                                                                                                                                                                                                                                                                                                                                                                                                                                                                                                                                                                                                                                                                                                                                                                                                                                                                                                                                                                                                                                                                                                                                                                                                                                                                                                 | Innovative Genomics Institute, UC Berkeley                | Innovative Genomics Institute, UC Berkeley                                                                                 | Stacia Wyman, Haridha Shivram, Phil Frankino, Liana Lareau, Shana McDevitt, Justin Choi                                                                                                                                                                                                                                                                                                                                                                                                                                                                                                                                                                                                                                                                                                                                                             |
| EPI_ISL_955261, EPI_ISL_955263                                                                                                                                                                                                                                                                                                                                                                                                                                                                                                                                                                                                                                                                                                                                                                                                                                                                                                                                                                                                                                                                                                                                                                                                                                                                                                                                                                                                                                                                                                                                                                                                                                                                                                                                                                                                                                                                                                                                                                                                                                                                                                                                                                                                                                                                                                                                                                                                 | Fulgent Genetics                                          | Fulgent Genetics                                                                                                           | Harry Gao, Mickey Li, John Gao, Joseph Fierro, Benafsh Sapra, Becky Tsai, Yan Meng, Doreen Ng, James Xie                                                                                                                                                                                                                                                                                                                                                                                                                                                                                                                                                                                                                                                                                                                                            |
| EPI_ISL_955337, EPI_ISL_955338, EPI_ISL_955339, EPI_ISL_955340, EPI_ISL_955341, EPI_ISL_955342, EPI_ISL_955343, EPI_ISL_955344, EPI_ISL_955345, EPI_ISL_955346, EPI_ISL_955347, EPI_ISL_955348, EPI_ISL_955349, EPI_ISL_955350, EPI_ISL_955351, EPI_ISL_955352                                                                                                                                                                                                                                                                                                                                                                                                                                                                                                                                                                                                                                                                                                                                                                                                                                                                                                                                                                                                                                                                                                                                                                                                                                                                                                                                                                                                                                                                                                                                                                                                                                                                                                                                                                                                                                                                                                                                                                                                                                                                                                                                                                 |                                                           |                                                                                                                            |                                                                                                                                                                                                                                                                                                                                                                                                                                                                                                                                                                                                                                                                                                                                                                                                                                                     |
| see above                                                                                                                                                                                                                                                                                                                                                                                                                                                                                                                                                                                                                                                                                                                                                                                                                                                                                                                                                                                                                                                                                                                                                                                                                                                                                                                                                                                                                                                                                                                                                                                                                                                                                                                                                                                                                                                                                                                                                                                                                                                                                                                                                                                                                                                                                                                                                                                                                      | UC Davis- Department of Pathology and Laboratory Medicine | Chan-Zuckerberg Biohub                                                                                                     | CZB Cliahub Consortium                                                                                                                                                                                                                                                                                                                                                                                                                                                                                                                                                                                                                                                                                                                                                                                                                              |
| EPI_ISL_955353, EPI_ISL_955354, EPI_ISL_955355, EPI_ISL_955356, EPI_ISL_955357, EPI_ISL_955358, EPI_ISL_955359, EPI_ISL_955360, EPI_ISL_955361, EPI_ISL_955362, EPI_ISL_955363, EPI_ISL_955364, EPI_ISL_955365, EPI_ISL_955366, EPI_ISL_955367, EPI_ISL_955368, EPI_ISL_955369, EPI_ISL_955370, EPI_ISL_955371, EPI_ISL_955372, EPI_ISL_955373, EPI_ISL_955374, EPI_ISL_955375, EPI_ISL_955376, EPI_ISL_955377, EPI_ISL_955378, EPI_ISL_955379, EPI_ISL_955380, EPI_ISL_955381, EPI_ISL_955382, EPI_ISL_955383, EPI_ISL_955384, EPI_ISL_955385                                                                                                                                                                                                                                                                                                                                                                                                                                                                                                                                                                                                                                                                                                                                                                                                                                                                                                                                                                                                                                                                                                                                                                                                                                                                                                                                                                                                                                                                                                                                                                                                                                                                                                                                                                                                                                                                                 |                                                           |                                                                                                                            |                                                                                                                                                                                                                                                                                                                                                                                                                                                                                                                                                                                                                                                                                                                                                                                                                                                     |
| see above                                                                                                                                                                                                                                                                                                                                                                                                                                                                                                                                                                                                                                                                                                                                                                                                                                                                                                                                                                                                                                                                                                                                                                                                                                                                                                                                                                                                                                                                                                                                                                                                                                                                                                                                                                                                                                                                                                                                                                                                                                                                                                                                                                                                                                                                                                                                                                                                                      | Santa Clara County Public Health Laboratory               | Chan-Zuckerberg Biohub                                                                                                     | CZB Cliahub Consortium                                                                                                                                                                                                                                                                                                                                                                                                                                                                                                                                                                                                                                                                                                                                                                                                                              |
| EPI_ISL_955386, EPI_ISL_955387, EPI_ISL_955388, EPI_ISL_955389, EPI_ISL_955390                                                                                                                                                                                                                                                                                                                                                                                                                                                                                                                                                                                                                                                                                                                                                                                                                                                                                                                                                                                                                                                                                                                                                                                                                                                                                                                                                                                                                                                                                                                                                                                                                                                                                                                                                                                                                                                                                                                                                                                                                                                                                                                                                                                                                                                                                                                                                 | Alameda County Public Health Lab                          | Chan-Zuckerberg Biohub                                                                                                     | CZB Cliahub Consortium                                                                                                                                                                                                                                                                                                                                                                                                                                                                                                                                                                                                                                                                                                                                                                                                                              |
| EPI_ISL_955496, EPI_ISL_955497, EPI_ISL_955498, EPI_ISL_955499, EPI_ISL_955500, EPI_ISL_955501, EPI_ISL_955502, EPI_ISL_955503, EPI_ISL_955504, EPI_ISL_955505, EPI_ISL_955506, EPI_ISL_955507, EPI_ISL_955508, EPI_ISL_955509, EPI_ISL_955510, EPI_ISL_955511, EPI_ISL_955512, EPI_ISL_955513, EPI_ISL_955514, EPI_ISL_955515, EPI_ISL_955516, EPI_ISL_955517, EPI_ISL_955518, EPI_ISL_955519, EPI_ISL_955520, EPI_ISL_955521, EPI_ISL_955522, EPI_ISL_955523, EPI_ISL_955524, EPI_ISL_955525, EPI_ISL_955526, EPI_ISL_955527, EPI_ISL_955528, EPI_ISL_955529, EPI_ISL_955530, EPI_ISL_955531, EPI_ISL_955532, EPI_ISL_955533, EPI_ISL_955534, EPI_ISL_955535, EPI_ISL_955536, EPI_ISL_955537, EPI_ISL_955538, EPI_ISL_955539, EPI_ISL_955540, EPI_ISL_955541, EPI_ISL_955542, EPI_ISL_955543, EPI_ISL_955544, EPI_ISL_955545, EPI_ISL_955546, EPI_ISL_955547, EPI_ISL_955548, EPI_ISL_955549,                                                                                                                                                                                                                                                                                                                                                                                                                                                                                                                                                                                                                                                                                                                                                                                                                                                                                                                                                                                                                                                                                                                                                                                                                                                                                                                                                                                                                                                                                                                                |                                                           |                                                                                                                            |                                                                                                                                                                                                                                                                                                                                                                                                                                                                                                                                                                                                                                                                                                                                                                                                                                                     |



|                                                                                                                                                                                                                                                                                                                                                                                                                                                                                                                                                                                                                                                                                                                                                                                                                                                                                                                                                                                                                                                                                                                                                                                                                                                                                                                                                                                                                                                                |                                 |                        |                        |
|----------------------------------------------------------------------------------------------------------------------------------------------------------------------------------------------------------------------------------------------------------------------------------------------------------------------------------------------------------------------------------------------------------------------------------------------------------------------------------------------------------------------------------------------------------------------------------------------------------------------------------------------------------------------------------------------------------------------------------------------------------------------------------------------------------------------------------------------------------------------------------------------------------------------------------------------------------------------------------------------------------------------------------------------------------------------------------------------------------------------------------------------------------------------------------------------------------------------------------------------------------------------------------------------------------------------------------------------------------------------------------------------------------------------------------------------------------------|---------------------------------|------------------------|------------------------|
| see above                                                                                                                                                                                                                                                                                                                                                                                                                                                                                                                                                                                                                                                                                                                                                                                                                                                                                                                                                                                                                                                                                                                                                                                                                                                                                                                                                                                                                                                      | Orange County Public Health Lab | Chan-Zuckerberg Biohub | CZB Ciiahub Consortium |
| EPI_ISL_979710, EPI_ISL_979711, EPI_ISL_979712, EPI_ISL_979713, EPI_ISL_979714, EPI_ISL_979715, EPI_ISL_979716, EPI_ISL_979717, EPI_ISL_979718, EPI_ISL_979719, EPI_ISL_979720, EPI_ISL_979721, EPI_ISL_979722, EPI_ISL_979723, EPI_ISL_979724, EPI_ISL_979725, EPI_ISL_979726, EPI_ISL_979727, EPI_ISL_979728, EPI_ISL_979729, EPI_ISL_979730, EPI_ISL_979731, EPI_ISL_979732, EPI_ISL_979733, EPI_ISL_979734, EPI_ISL_979735, EPI_ISL_979736, EPI_ISL_979737, EPI_ISL_979738, EPI_ISL_979739, EPI_ISL_979740, EPI_ISL_979741, EPI_ISL_979742, EPI_ISL_979743, EPI_ISL_979744, EPI_ISL_979745, EPI_ISL_979746, EPI_ISL_979747, EPI_ISL_979748, EPI_ISL_979749, EPI_ISL_979750, EPI_ISL_979751, EPI_ISL_979752, EPI_ISL_979753, EPI_ISL_979754, EPI_ISL_979755, EPI_ISL_979756, EPI_ISL_979757, EPI_ISL_979758, EPI_ISL_979759, EPI_ISL_979760, EPI_ISL_979761, EPI_ISL_979762, EPI_ISL_979763, EPI_ISL_979764, EPI_ISL_979765, EPI_ISL_979766, EPI_ISL_979767, EPI_ISL_979768, EPI_ISL_979769, EPI_ISL_979770, EPI_ISL_979771, EPI_ISL_979772, EPI_ISL_979773, EPI_ISL_979774, EPI_ISL_979775, EPI_ISL_979776, EPI_ISL_979777, EPI_ISL_979778, EPI_ISL_979779, EPI_ISL_979780, EPI_ISL_979781, EPI_ISL_979782, EPI_ISL_979783, EPI_ISL_979784, EPI_ISL_979785, EPI_ISL_979786, EPI_ISL_979787, EPI_ISL_979788, EPI_ISL_979789, EPI_ISL_979790, EPI_ISL_979791, EPI_ISL_979792, EPI_ISL_979793, EPI_ISL_979794, EPI_ISL_979795, EPI_ISL_979796, EPI_ISL_979797 |                                 |                        |                        |

|                                                                                                                                                                                                                                                                                                                                                                                                                                                                                                                                                                                                                                                                                                                                                                                                                                                                                                                                                                                                                                                                                                                                                                                                                                                                                                                                                                                                                                                                                                                                                                                                                                                                                                                                                                                                                                                                                                                                                                                                                                                                                                                                                                                                                                                                                                                                                                                                                                                                                                                                                                                                                                                                                                                                                                                                                                                                                                                                                                                                                                                                                                                                                                                                                                                                                                                                                                                                                                                                                                                                                                                                                                                                                                                                                                                                                                |                                            |                                            |                                                            |
|--------------------------------------------------------------------------------------------------------------------------------------------------------------------------------------------------------------------------------------------------------------------------------------------------------------------------------------------------------------------------------------------------------------------------------------------------------------------------------------------------------------------------------------------------------------------------------------------------------------------------------------------------------------------------------------------------------------------------------------------------------------------------------------------------------------------------------------------------------------------------------------------------------------------------------------------------------------------------------------------------------------------------------------------------------------------------------------------------------------------------------------------------------------------------------------------------------------------------------------------------------------------------------------------------------------------------------------------------------------------------------------------------------------------------------------------------------------------------------------------------------------------------------------------------------------------------------------------------------------------------------------------------------------------------------------------------------------------------------------------------------------------------------------------------------------------------------------------------------------------------------------------------------------------------------------------------------------------------------------------------------------------------------------------------------------------------------------------------------------------------------------------------------------------------------------------------------------------------------------------------------------------------------------------------------------------------------------------------------------------------------------------------------------------------------------------------------------------------------------------------------------------------------------------------------------------------------------------------------------------------------------------------------------------------------------------------------------------------------------------------------------------------------------------------------------------------------------------------------------------------------------------------------------------------------------------------------------------------------------------------------------------------------------------------------------------------------------------------------------------------------------------------------------------------------------------------------------------------------------------------------------------------------------------------------------------------------------------------------------------------------------------------------------------------------------------------------------------------------------------------------------------------------------------------------------------------------------------------------------------------------------------------------------------------------------------------------------------------------------------------------------------------------------------------------------------------------|--------------------------------------------|--------------------------------------------|------------------------------------------------------------|
| see above                                                                                                                                                                                                                                                                                                                                                                                                                                                                                                                                                                                                                                                                                                                                                                                                                                                                                                                                                                                                                                                                                                                                                                                                                                                                                                                                                                                                                                                                                                                                                                                                                                                                                                                                                                                                                                                                                                                                                                                                                                                                                                                                                                                                                                                                                                                                                                                                                                                                                                                                                                                                                                                                                                                                                                                                                                                                                                                                                                                                                                                                                                                                                                                                                                                                                                                                                                                                                                                                                                                                                                                                                                                                                                                                                                                                                      | Humboldt County Public Health Laboratory   | Chan-Zuckerberg Biohub                     | CZB Ciiahub Consortium                                     |
| EPI_ISL_980974                                                                                                                                                                                                                                                                                                                                                                                                                                                                                                                                                                                                                                                                                                                                                                                                                                                                                                                                                                                                                                                                                                                                                                                                                                                                                                                                                                                                                                                                                                                                                                                                                                                                                                                                                                                                                                                                                                                                                                                                                                                                                                                                                                                                                                                                                                                                                                                                                                                                                                                                                                                                                                                                                                                                                                                                                                                                                                                                                                                                                                                                                                                                                                                                                                                                                                                                                                                                                                                                                                                                                                                                                                                                                                                                                                                                                 | Innovative Genomics Institute, UC Berkeley | Innovative Genomics Institute, UC Berkeley | Stacia Wyman, Haridha Shivrām, Phil Frankino, Liana Lareau |
| EPI_ISL_984318, EPI_ISL_984319, EPI_ISL_984320, EPI_ISL_984321, EPI_ISL_984322, EPI_ISL_984323, EPI_ISL_984324, EPI_ISL_984325, EPI_ISL_984326, EPI_ISL_984327, EPI_ISL_984328, EPI_ISL_984329, EPI_ISL_984330, EPI_ISL_984331, EPI_ISL_984333, EPI_ISL_984334, EPI_ISL_984335, EPI_ISL_984336, EPI_ISL_984337, EPI_ISL_984338, EPI_ISL_984339, EPI_ISL_984340, EPI_ISL_984341, EPI_ISL_984342, EPI_ISL_984343, EPI_ISL_984344, EPI_ISL_984345, EPI_ISL_984346, EPI_ISL_984348, EPI_ISL_984349, EPI_ISL_984350, EPI_ISL_984351, EPI_ISL_984352, EPI_ISL_984353, EPI_ISL_984355, EPI_ISL_984356, EPI_ISL_984357, EPI_ISL_984359, EPI_ISL_984361, EPI_ISL_984362, EPI_ISL_984365, EPI_ISL_984366, EPI_ISL_984367, EPI_ISL_984368, EPI_ISL_984369, EPI_ISL_984370, EPI_ISL_984375, EPI_ISL_984376, EPI_ISL_984377, EPI_ISL_984378, EPI_ISL_984380, EPI_ISL_984384, EPI_ISL_984385, EPI_ISL_984386, EPI_ISL_984389, EPI_ISL_984390, EPI_ISL_984391, EPI_ISL_984393, EPI_ISL_984394, EPI_ISL_984395, EPI_ISL_984396, EPI_ISL_984397, EPI_ISL_984398, EPI_ISL_984399, EPI_ISL_984400, EPI_ISL_984401, EPI_ISL_984402, EPI_ISL_984403, EPI_ISL_984404, EPI_ISL_984405, EPI_ISL_984406, EPI_ISL_984407, EPI_ISL_984408, EPI_ISL_984409, EPI_ISL_984410, EPI_ISL_984411, EPI_ISL_984412, EPI_ISL_984413, EPI_ISL_984414, EPI_ISL_984415, EPI_ISL_984416, EPI_ISL_984417, EPI_ISL_984418, EPI_ISL_984420, EPI_ISL_984421, EPI_ISL_984422, EPI_ISL_984423, EPI_ISL_984424, EPI_ISL_984425, EPI_ISL_984426, EPI_ISL_984427, EPI_ISL_984428, EPI_ISL_984429, EPI_ISL_984430, EPI_ISL_984431, EPI_ISL_984432, EPI_ISL_984433, EPI_ISL_984434, EPI_ISL_984435, EPI_ISL_984437, EPI_ISL_984439, EPI_ISL_984440, EPI_ISL_984441, EPI_ISL_984442, EPI_ISL_984443, EPI_ISL_984444, EPI_ISL_984490, EPI_ISL_984491, EPI_ISL_984492, EPI_ISL_984493, EPI_ISL_984494, EPI_ISL_984495, EPI_ISL_984496, EPI_ISL_984497, EPI_ISL_984498, EPI_ISL_984499, EPI_ISL_984500, EPI_ISL_984501, EPI_ISL_984502, EPI_ISL_984503, EPI_ISL_984504, EPI_ISL_984505, EPI_ISL_984506, EPI_ISL_984507, EPI_ISL_984508, EPI_ISL_984509, EPI_ISL_984510, EPI_ISL_984511, EPI_ISL_984512, EPI_ISL_984513, EPI_ISL_984514, EPI_ISL_984515, EPI_ISL_984516, EPI_ISL_984517, EPI_ISL_984518, EPI_ISL_984519, EPI_ISL_984520, EPI_ISL_984521, EPI_ISL_984522, EPI_ISL_984523, EPI_ISL_984524, EPI_ISL_984525, EPI_ISL_984526, EPI_ISL_984527, EPI_ISL_984528, EPI_ISL_984529, EPI_ISL_984530, EPI_ISL_984531, EPI_ISL_984532, EPI_ISL_984533, EPI_ISL_984534, EPI_ISL_984535, EPI_ISL_984536, EPI_ISL_984537, EPI_ISL_984538, EPI_ISL_984539, EPI_ISL_984540, EPI_ISL_984541, EPI_ISL_984542, EPI_ISL_984543, EPI_ISL_984544, EPI_ISL_984545, EPI_ISL_984546, EPI_ISL_984547, EPI_ISL_984548, EPI_ISL_984549, EPI_ISL_984550, EPI_ISL_984551, EPI_ISL_984552, EPI_ISL_984553, EPI_ISL_984554, EPI_ISL_984555, EPI_ISL_984556, EPI_ISL_984557, EPI_ISL_984558, EPI_ISL_984559, EPI_ISL_984560, EPI_ISL_984561, EPI_ISL_984562, EPI_ISL_984563, EPI_ISL_984564, EPI_ISL_984565, EPI_ISL_984566, EPI_ISL_984567, EPI_ISL_984568, EPI_ISL_984569, EPI_ISL_984570, EPI_ISL_984571, EPI_ISL_984572, EPI_ISL_984573, EPI_ISL_984574, EPI_ISL_984575, EPI_ISL_984576, EPI_ISL_984577, EPI_ISL_984578, EPI_ISL_984579, EPI_ISL_984580, EPI_ISL_984581, EPI_ISL_984582, EPI_ISL_984583, EPI_ISL_984584, EPI_ISL_984585, EPI_ISL_984586, EPI_ISL_984587, EPI_ISL_984588, EPI_ISL_984589, EPI_ISL_984590, EPI_ISL_984591, EPI_ISL_984592, EPI_ISL_984593, EPI_ISL_984594, EPI_ISL_984595, EPI_ISL_984596, EPI_ISL_984597, EPI_ISL_984598, EPI_ISL_984599, EPI_ISL_984600, EPI_ISL_984601, EPI_ISL_984602, EPI_ISL_984603, EPI_ISL_984604, EPI_ISL_984605, EPI_ISL_984606, EPI_ISL_984607, EPI_ISL_984608, EPI_ISL_984609, EPI_ISL_984610, EPI_ISL_984611, EPI_ISL_984612, EPI_ISL_984613 |                                            |                                            |                                                            |

|           |                                        |                                                          |                                                                                                  |
|-----------|----------------------------------------|----------------------------------------------------------|--------------------------------------------------------------------------------------------------|
| see above | California Department of Public Health | Chiu Laboratory, University of California, San Francisco | Charles Chiu, Xianding (Wayne) Deng, Candace Wang, Venice Servellita, Jill Hacker, Debra Wadford |
|-----------|----------------------------------------|----------------------------------------------------------|--------------------------------------------------------------------------------------------------|
