# Supplementary material for: Rapid evaluation of COVID-19 vaccine effectiveness against VOC/VOIs by genetic mismatch
Source: bioRxiv or medRxiv preprint supplement (doi:10.1101/2021.04.22.21254079), 2021-11-26
Supplement: Supplementary file [file media-2.zip]

We gratefully acknowledge the following Authors from the Originating laboratories responsible for obtaining the specimens, as well as the Submitting laboratories where the genome data were generated and shared via GISAID, on which this research is based.

All Submitters of data may be contacted directly via [www.gisaid.org](http://www.gisaid.org)

Authors are sorted alphabetically.

| Accession ID                                                                                                                                                                                                                                                                                                                                                                                                                                                                                                                                                                                                                                                                                                                                                                                                                                                                                                                                                                                                                                                                                                                                                                                                                                                                                                                                                                                                                                                                                                                                                                                                                                                                                                                                                                                                                                                                                                                                                                                                                                                                                                                                                                                                                                                                                                                                                                                                                                                                                                                                                                                                                                                                                                                                                                                                                                                                                                                                                                                                                                                                                                                                                                                                                                                                                                                                                                                                                                                                                                                                                                                                                                                                                                                                                                                                                                                                                                                                                                                                                                                                                                                                                                                                                                                                                                                                                                                                                                                                                                                                                                                                                                                                                                                                                                                                                                                                                                                                                                                                                                                                                                                                                   | Originating Laboratory      | Submitting Laboratory                                  | Authors                                                                                      |
|----------------------------------------------------------------------------------------------------------------------------------------------------------------------------------------------------------------------------------------------------------------------------------------------------------------------------------------------------------------------------------------------------------------------------------------------------------------------------------------------------------------------------------------------------------------------------------------------------------------------------------------------------------------------------------------------------------------------------------------------------------------------------------------------------------------------------------------------------------------------------------------------------------------------------------------------------------------------------------------------------------------------------------------------------------------------------------------------------------------------------------------------------------------------------------------------------------------------------------------------------------------------------------------------------------------------------------------------------------------------------------------------------------------------------------------------------------------------------------------------------------------------------------------------------------------------------------------------------------------------------------------------------------------------------------------------------------------------------------------------------------------------------------------------------------------------------------------------------------------------------------------------------------------------------------------------------------------------------------------------------------------------------------------------------------------------------------------------------------------------------------------------------------------------------------------------------------------------------------------------------------------------------------------------------------------------------------------------------------------------------------------------------------------------------------------------------------------------------------------------------------------------------------------------------------------------------------------------------------------------------------------------------------------------------------------------------------------------------------------------------------------------------------------------------------------------------------------------------------------------------------------------------------------------------------------------------------------------------------------------------------------------------------------------------------------------------------------------------------------------------------------------------------------------------------------------------------------------------------------------------------------------------------------------------------------------------------------------------------------------------------------------------------------------------------------------------------------------------------------------------------------------------------------------------------------------------------------------------------------------------------------------------------------------------------------------------------------------------------------------------------------------------------------------------------------------------------------------------------------------------------------------------------------------------------------------------------------------------------------------------------------------------------------------------------------------------------------------------------------------------------------------------------------------------------------------------------------------------------------------------------------------------------------------------------------------------------------------------------------------------------------------------------------------------------------------------------------------------------------------------------------------------------------------------------------------------------------------------------------------------------------------------------------------------------------------------------------------------------------------------------------------------------------------------------------------------------------------------------------------------------------------------------------------------------------------------------------------------------------------------------------------------------------------------------------------------------------------------------------------------------------------------------------|-----------------------------|--------------------------------------------------------|----------------------------------------------------------------------------------------------|
| EPI_ISL_582642, EPI_ISL_582643, EPI_ISL_582644, EPI_ISL_582645, EPI_ISL_582646, EPI_ISL_582647, EPI_ISL_582648, EPI_ISL_582649, EPI_ISL_582650, EPI_ISL_582651, EPI_ISL_582652, EPI_ISL_582653, EPI_ISL_582654, EPI_ISL_582655, EPI_ISL_582656, EPI_ISL_582657, EPI_ISL_582658, EPI_ISL_582659, EPI_ISL_582660, EPI_ISL_582661, EPI_ISL_582662, EPI_ISL_582663, EPI_ISL_582664, EPI_ISL_582665, EPI_ISL_582666, EPI_ISL_582667, EPI_ISL_582668, EPI_ISL_582669, EPI_ISL_582670, EPI_ISL_582671, EPI_ISL_582672, EPI_ISL_582673, EPI_ISL_582674, EPI_ISL_582675, EPI_ISL_582676, EPI_ISL_582677, EPI_ISL_582678, EPI_ISL_582679, EPI_ISL_582680, EPI_ISL_582681, EPI_ISL_582682, EPI_ISL_582683, EPI_ISL_582684, EPI_ISL_582685, EPI_ISL_582686, EPI_ISL_582687, EPI_ISL_582688, EPI_ISL_582689, EPI_ISL_582690, EPI_ISL_582691                                                                                                                                                                                                                                                                                                                                                                                                                                                                                                                                                                                                                                                                                                                                                                                                                                                                                                                                                                                                                                                                                                                                                                                                                                                                                                                                                                                                                                                                                                                                                                                                                                                                                                                                                                                                                                                                                                                                                                                                                                                                                                                                                                                                                                                                                                                                                                                                                                                                                                                                                                                                                                                                                                                                                                                                                                                                                                                                                                                                                                                                                                                                                                                                                                                                                                                                                                                                                                                                                                                                                                                                                                                                                                                                                                                                                                                                                                                                                                                                                                                                                                                                                                                                                                                                                                                                 |                             |                                                        |                                                                                              |
| see above                                                                                                                                                                                                                                                                                                                                                                                                                                                                                                                                                                                                                                                                                                                                                                                                                                                                                                                                                                                                                                                                                                                                                                                                                                                                                                                                                                                                                                                                                                                                                                                                                                                                                                                                                                                                                                                                                                                                                                                                                                                                                                                                                                                                                                                                                                                                                                                                                                                                                                                                                                                                                                                                                                                                                                                                                                                                                                                                                                                                                                                                                                                                                                                                                                                                                                                                                                                                                                                                                                                                                                                                                                                                                                                                                                                                                                                                                                                                                                                                                                                                                                                                                                                                                                                                                                                                                                                                                                                                                                                                                                                                                                                                                                                                                                                                                                                                                                                                                                                                                                                                                                                                                      | Sheikh Khalifa Medical City | Molecular/Surveillance lab Sheikh Khalifa Medical City | Amirtharaj Francis, Sajeed Abdul, Hala Imambaccus, Sahar Almarzooqi, Hiba Saud, Stefan Weber |
| EPI_ISL_859561, EPI_ISL_859562, EPI_ISL_859563, EPI_ISL_859564, EPI_ISL_859565, EPI_ISL_859566, EPI_ISL_859567, EPI_ISL_859568, EPI_ISL_859569, EPI_ISL_859570, EPI_ISL_859571, EPI_ISL_859572, EPI_ISL_859573, EPI_ISL_859574, EPI_ISL_859575, EPI_ISL_859576, EPI_ISL_859577, EPI_ISL_859601, EPI_ISL_859602, EPI_ISL_859603, EPI_ISL_859604, EPI_ISL_859605, EPI_ISL_859607, EPI_ISL_859609, EPI_ISL_859610, EPI_ISL_859619, EPI_ISL_859622, EPI_ISL_859637, EPI_ISL_859656, EPI_ISL_859657, EPI_ISL_859658, EPI_ISL_859659, EPI_ISL_859660, EPI_ISL_859661, EPI_ISL_859662, EPI_ISL_859663, EPI_ISL_859664, EPI_ISL_859665, EPI_ISL_859666, EPI_ISL_859667, EPI_ISL_859668, EPI_ISL_859669, EPI_ISL_859670, EPI_ISL_859671, EPI_ISL_859672, EPI_ISL_859673, EPI_ISL_859674, EPI_ISL_859675, EPI_ISL_859676, EPI_ISL_859677, EPI_ISL_859678, EPI_ISL_859679, EPI_ISL_859680, EPI_ISL_859681, EPI_ISL_859682, EPI_ISL_859683, EPI_ISL_859684, EPI_ISL_859685, EPI_ISL_859686, EPI_ISL_859687, EPI_ISL_859688, EPI_ISL_859689, EPI_ISL_859690, EPI_ISL_859691, EPI_ISL_859692, EPI_ISL_859693, EPI_ISL_859694, EPI_ISL_859695, EPI_ISL_859696, EPI_ISL_859697, EPI_ISL_859698, EPI_ISL_859699, EPI_ISL_859700, EPI_ISL_859701, EPI_ISL_859702, EPI_ISL_859703, EPI_ISL_859704, EPI_ISL_859705, EPI_ISL_859706, EPI_ISL_859707, EPI_ISL_859708, EPI_ISL_859709, EPI_ISL_859710, EPI_ISL_859711, EPI_ISL_859712, EPI_ISL_859713, EPI_ISL_859714, EPI_ISL_859715, EPI_ISL_859716, EPI_ISL_859717, EPI_ISL_859718, EPI_ISL_859719, EPI_ISL_859720, EPI_ISL_859721, EPI_ISL_859722, EPI_ISL_859723, EPI_ISL_859724, EPI_ISL_859725, EPI_ISL_859726, EPI_ISL_859727, EPI_ISL_859728, EPI_ISL_859729, EPI_ISL_859730, EPI_ISL_859731, EPI_ISL_859732, EPI_ISL_859733, EPI_ISL_859734, EPI_ISL_859735, EPI_ISL_859736, EPI_ISL_859737, EPI_ISL_859738, EPI_ISL_859739, EPI_ISL_859740, EPI_ISL_859741, EPI_ISL_859742, EPI_ISL_859743, EPI_ISL_859744, EPI_ISL_859745, EPI_ISL_859746, EPI_ISL_859747, EPI_ISL_859748, EPI_ISL_859749, EPI_ISL_859750, EPI_ISL_859751, EPI_ISL_859752, EPI_ISL_859753, EPI_ISL_859754, EPI_ISL_859755, EPI_ISL_859756, EPI_ISL_859757, EPI_ISL_859758, EPI_ISL_859759, EPI_ISL_859760, EPI_ISL_859761, EPI_ISL_859762, EPI_ISL_859763, EPI_ISL_859764, EPI_ISL_859765, EPI_ISL_859766, EPI_ISL_859767, EPI_ISL_859768, EPI_ISL_859769, EPI_ISL_859770, EPI_ISL_859771, EPI_ISL_859772, EPI_ISL_859773, EPI_ISL_859774, EPI_ISL_859775, EPI_ISL_859776, EPI_ISL_859777, EPI_ISL_859778, EPI_ISL_859779, EPI_ISL_859780, EPI_ISL_859781, EPI_ISL_859782, EPI_ISL_859783, EPI_ISL_859784, EPI_ISL_859785, EPI_ISL_859786, EPI_ISL_859787, EPI_ISL_859788, EPI_ISL_859789, EPI_ISL_859790, EPI_ISL_859791, EPI_ISL_859792, EPI_ISL_859793, EPI_ISL_859794, EPI_ISL_859795, EPI_ISL_859796, EPI_ISL_859797, EPI_ISL_859798, EPI_ISL_859799, EPI_ISL_859800, EPI_ISL_859801, EPI_ISL_859802, EPI_ISL_859803, EPI_ISL_859804, EPI_ISL_859805, EPI_ISL_859806, EPI_ISL_859807, EPI_ISL_859808, EPI_ISL_859809, EPI_ISL_859810, EPI_ISL_859811, EPI_ISL_859812, EPI_ISL_859813, EPI_ISL_859814, EPI_ISL_859815, EPI_ISL_859816, EPI_ISL_859817, EPI_ISL_859818, EPI_ISL_859819, EPI_ISL_859820, EPI_ISL_859821, EPI_ISL_859822, EPI_ISL_859823, EPI_ISL_859824, EPI_ISL_859825, EPI_ISL_859826, EPI_ISL_859827, EPI_ISL_859828, EPI_ISL_859829, EPI_ISL_859830, EPI_ISL_859831, EPI_ISL_859832, EPI_ISL_859833, EPI_ISL_859834, EPI_ISL_859835, EPI_ISL_859836, EPI_ISL_859837, EPI_ISL_859838, EPI_ISL_859839, EPI_ISL_859840, EPI_ISL_859841, EPI_ISL_859842, EPI_ISL_859843, EPI_ISL_859844, EPI_ISL_859845, EPI_ISL_859846, EPI_ISL_859847, EPI_ISL_859848, EPI_ISL_859849, EPI_ISL_859850, EPI_ISL_859851, EPI_ISL_859852, EPI_ISL_859853, EPI_ISL_859854, EPI_ISL_859855, EPI_ISL_859856, EPI_ISL_859857, EPI_ISL_859858, EPI_ISL_859859, EPI_ISL_859860, EPI_ISL_859861, EPI_ISL_859862, EPI_ISL_859863, EPI_ISL_859864, EPI_ISL_859865, EPI_ISL_859866, EPI_ISL_859867, EPI_ISL_859868, EPI_ISL_859869, EPI_ISL_859870, EPI_ISL_859871, EPI_ISL_859872, EPI_ISL_859873, EPI_ISL_859874, EPI_ISL_859875, EPI_ISL_859876, EPI_ISL_859877, EPI_ISL_859878, EPI_ISL_859879, EPI_ISL_859880, EPI_ISL_859881, EPI_ISL_859882, EPI_ISL_859883, EPI_ISL_859884, EPI_ISL_859885, EPI_ISL_859886, EPI_ISL_859887, EPI_ISL_859888, EPI_ISL_859889, EPI_ISL_859890, EPI_ISL_859891, EPI_ISL_859892, EPI_ISL_859893, EPI_ISL_859894, EPI_ISL_859895, EPI_ISL_859896, EPI_ISL_859897, EPI_ISL_859898, EPI_ISL_859899, EPI_ISL_859900, EPI_ISL_859901, EPI_ISL_859902, EPI_ISL_859903, EPI_ISL_859904, EPI_ISL_859905, EPI_ISL_859906, EPI_ISL_859907, EPI_ISL_859908, EPI_ISL_859909, EPI_ISL_859910, EPI_ISL_859911, EPI_ISL_859912, EPI_ISL_859913, EPI_ISL_859914, EPI_ISL_859915, EPI_ISL_859916, EPI_ISL_859917, EPI_ISL_859918, EPI_ISL_859919, EPI_ISL_859920, EPI_ISL_859921, EPI_ISL_859922, EPI_ISL_859923, EPI_ISL_859924, EPI_ISL_859925, EPI_ISL_859926, EPI_ISL_859927, EPI_ISL_859928, EPI_ISL_859929, EPI_ISL_859930, EPI_ISL_859931, EPI_ISL_859932, EPI_ISL_859933, EPI_ISL_859934, EPI_ISL_859935, EPI_ISL_860090, EPI_ISL_860091 |                             |                                                        |                                                                                              |
| see above                                                                                                                                                                                                                                                                                                                                                                                                                                                                                                                                                                                                                                                                                                                                                                                                                                                                                                                                                                                                                                                                                                                                                                                                                                                                                                                                                                                                                                                                                                                                                                                                                                                                                                                                                                                                                                                                                                                                                                                                                                                                                                                                                                                                                                                                                                                                                                                                                                                                                                                                                                                                                                                                                                                                                                                                                                                                                                                                                                                                                                                                                                                                                                                                                                                                                                                                                                                                                                                                                                                                                                                                                                                                                                                                                                                                                                                                                                                                                                                                                                                                                                                                                                                                                                                                                                                                                                                                                                                                                                                                                                                                                                                                                                                                                                                                                                                                                                                                                                                                                                                                                                                                                      | BTC, Khalifa University     | BTC, Khalifa University                                | Al Safar et al                                                                               |
