# Supplementary material for: Rapid evaluation of COVID-19 vaccine effectiveness against VOC/VOIs by genetic mismatch
Source: bioRxiv or medRxiv preprint supplement (doi:10.1101/2021.04.22.21254079), 2021-11-26
Supplement: Supplementary file [file media-2.zip]

We gratefully acknowledge the following Authors from the Originating laboratories responsible for obtaining the specimens, as well as the Submitting laboratories where the genome data were generated and shared via GISAID, on which this research is based.

All Submitters of data may be contacted directly via [www.gisaid.org](http://www.gisaid.org)

Authors are sorted alphabetically.

| Accession ID                                                                                                                                                                                                                                                                                                                                                                                                                                                                                                                                                                   | Originating Laboratory                                           | Submitting Laboratory                                            | Authors                                                                                                                               |
|--------------------------------------------------------------------------------------------------------------------------------------------------------------------------------------------------------------------------------------------------------------------------------------------------------------------------------------------------------------------------------------------------------------------------------------------------------------------------------------------------------------------------------------------------------------------------------|------------------------------------------------------------------|------------------------------------------------------------------|---------------------------------------------------------------------------------------------------------------------------------------|
| EPI_ISL_730567, EPI_ISL_730569, EPI_ISL_730570                                                                                                                                                                                                                                                                                                                                                                                                                                                                                                                                 | Gazi University Faculty of Medicine, Medical Virology Laboratory | Gazi University Faculty of Medicine, Medical Virology Laboratory | Erdem ahin, Hager Muftah, Selin Yiit, Shaknoza Sarzhanova, Özlem Güzel Tunçcan, Murat Dizbay, Il Fidan, Kayhan Çalar, Gülendām Bozday |
| EPI_ISL_730575, EPI_ISL_730577, EPI_ISL_730620, EPI_ISL_984736, EPI_ISL_984737, EPI_ISL_984738, EPI_ISL_984739, EPI_ISL_984740, EPI_ISL_984741, EPI_ISL_984742, EPI_ISL_984743, EPI_ISL_984744, EPI_ISL_984745, EPI_ISL_984746, EPI_ISL_984747, EPI_ISL_984748, EPI_ISL_984749, EPI_ISL_984750, EPI_ISL_984751, EPI_ISL_984752, EPI_ISL_984980, EPI_ISL_984981, EPI_ISL_984982, EPI_ISL_984983, EPI_ISL_984984, EPI_ISL_984985, EPI_ISL_984986, EPI_ISL_984987, EPI_ISL_984988, EPI_ISL_984989, EPI_ISL_984990, EPI_ISL_984991, EPI_ISL_984992, EPI_ISL_984993, EPI_ISL_984994 | Gazi University Faculty of Medicine, Medical Virology Laboratory | Gazi University Faculty of Medicine, Medical Virology Laboratory | Erdem ahin, Gülendām Bozday, Hager Muftah, Selin Yiit, Shaknoza Sarzhanova, Özlem Güzel Tunçcan, Murat Dizbay, Il Fidan, Kayhan Çalar |
| see above                                                                                                                                                                                                                                                                                                                                                                                                                                                                                                                                                                      | Gazi University Faculty of Medicine, Medical Virology Laboratory | Gazi University Faculty of Medicine, Medical Virology Laboratory | Erdem ahin, Gülendām Bozday, Hager Muftah, Selin Yiit, Shaknoza Sarzhanova, Özlem Güzel Tunçcan, Murat Dizbay, Il Fidan, Kayhan Çalar |
